# Supplementary material for: A cellular and molecular analysis of SoxB-driven neurogenesis in a cnidarian
Source: eLife journal article supplement (doi:10.7554/elife.78793), 2022-05-24
Supplement: supp3 [file DEG_marker_overlap_analysis_normalised.xlsx]

## Sheet: DEG_marker_overlap_analysis_nor
G_v_S	S_v_G	icells	soxB2	Cluster Nr
0	0	0	0	cluster_1
2.08333	3.22581	4.58015	0	cluster_2
0	0	0	0	cluster_3
0	0	0	0	cluster_4
0	0	0	0	cluster_5
6.25	3.22581	3.81679	0	cluster_6
0	6.45161	5.34351	0	cluster_7
16.6667	6.45161	0	0	cluster_8
2.08333	9.67742	4.58015	7.69231	cluster_9
0	0	3.05344	0	cluster_10
10.4167	19.3548	3.81679	3.84615	cluster_11
2.08333	3.22581	6.10687	7.69231	cluster_12
4.16667	16.129	8.39695	15.3846	cluster_13
14.5833	3.22581	8.39695	19.2308	cluster_14
6.25	6.45161	7.63359	0	cluster_15
8.33333	3.22581	4.58015	7.69231	cluster_16
8.33333	12.9032	9.92366	11.5385	cluster_17
4.16667	0	0	3.84615	cluster_18
6.25	0	4.58015	11.5385	cluster_19
2.08333	3.22581	8.39695	0	cluster_20
4.16667	3.22581	7.63359	3.84615	cluster_21
2.08333	0	9.16031	7.69231	cluster_22
