# Supplementary material for: A cellular and molecular analysis of SoxB-driven neurogenesis in a cnidarian
Source: eLife journal article supplement (doi:10.7554/elife.78793), 2022-05-24
Supplement: supp3 [file G_v_S.xlsx]

## Sheet: G_v_S.csv
overlap with cluster	cluster_name		normalised	48
0	cluster_1		0
1	cluster_2		2.08333
0	cluster_3		0
0	cluster_4		0
0	cluster_5		0
3	cluster_6		6.25
0	cluster_7		0
8	cluster_8		16.6667
1	cluster_9		2.08333
0	cluster_10		0
5	cluster_11		10.4167
1	cluster_12		2.08333
2	cluster_13		4.16667
7	cluster_14		14.5833
3	cluster_15		6.25
4	cluster_16		8.33333
4	cluster_17		8.33333
2	cluster_18		4.16667
3	cluster_19		6.25
1	cluster_20		2.08333
2	cluster_21		4.16667
1	cluster_22		2.08333
		SUM	100
