# Supplementary material for: A cellular and molecular analysis of SoxB-driven neurogenesis in a cnidarian
Source: eLife journal article supplement (doi:10.7554/elife.78793), 2022-05-24
Supplement: supp3 [file icells.xlsx]

## Sheet: icells.csv
overlap with cluster	cluster_name		normalised	131
0	cluster_1		0
6	cluster_2		4.58015
0	cluster_3		0
0	cluster_4		0
0	cluster_5		0
5	cluster_6		3.81679
7	cluster_7		5.34351
0	cluster_8		0
6	cluster_9		4.58015
4	cluster_10		3.05344
5	cluster_11		3.81679
8	cluster_12		6.10687
11	cluster_13		8.39695
11	cluster_14		8.39695
10	cluster_15		7.63359
6	cluster_16		4.58015
13	cluster_17		9.92366
0	cluster_18		0
6	cluster_19		4.58015
11	cluster_20		8.39695
10	cluster_21		7.63359
12	cluster_22		9.16031
		SUM	100
