# Supplementary material for: A cellular and molecular analysis of SoxB-driven neurogenesis in a cnidarian
Source: eLife journal article supplement (doi:10.7554/elife.78793), 2022-05-24
Supplement: supp3 [file RNA_quant_icells.xlsx]

## Sheet: RNA_quant_icells.csv
overlap with cluster	cluster_name		normalised	107
1	cluster_1		0.934579
5	cluster_2		4.6729
0	cluster_3		0
1	cluster_4		0.934579
0	cluster_5		0
3	cluster_6		2.80374
9	cluster_7		8.41121
1	cluster_8		0.934579
8	cluster_9		7.47664
2	cluster_10		1.86916
12	cluster_11		11.215
1	cluster_12		0.934579
10	cluster_13		9.34579
9	cluster_14		8.41121
6	cluster_15		5.60748
4	cluster_16		3.73832
8	cluster_17		7.47664
3	cluster_18		2.80374
7	cluster_19		6.54206
6	cluster_20		5.60748
1	cluster_21		0.934579
10	cluster_22		9.34579
		SUM	100
