# Supplementary material for: A cellular and molecular analysis of SoxB-driven neurogenesis in a cnidarian
Source: eLife journal article supplement (doi:10.7554/elife.78793), 2022-05-24
Supplement: supp3 [file RNA_quant_icells_CONTROL.xlsx]

## Sheet: RNA_quant_icells_CONTROL.csv
overlap with cluster	cluster_name		normalised	95
0	cluster_1		0
10	cluster_2		10.5263
0	cluster_3		0
1	cluster_4		1.05263
0	cluster_5		0
11	cluster_6		11.5789
2	cluster_7		2.10526
8	cluster_8		8.42105
1	cluster_9		1.05263
2	cluster_10		2.10526
8	cluster_11		8.42105
1	cluster_12		1.05263
12	cluster_13		12.6316
3	cluster_14		3.15789
3	cluster_15		3.15789
5	cluster_16		5.26316
3	cluster_17		3.15789
9	cluster_18		9.47368
2	cluster_19		2.10526
4	cluster_20		4.21053
6	cluster_21		6.31579
4	cluster_22		4.21053
		SUM	100
