# Supplementary material for: A cellular and molecular analysis of SoxB-driven neurogenesis in a cnidarian
Source: eLife journal article supplement (doi:10.7554/elife.78793), 2022-05-24
Supplement: supp3 [file RNA_quant_icells_prog.xlsx]

## Sheet: RNA_quant_icells_prog.csv
overlap with cluster	cluster_name		normalised	94
0	cluster_1		0
9	cluster_2		9.57447
0	cluster_3		0
1	cluster_4		1.06383
0	cluster_5		0
11	cluster_6		11.7021
1	cluster_7		1.06383
14	cluster_8		14.8936
3	cluster_9		3.19149
2	cluster_10		2.12766
5	cluster_11		5.31915
2	cluster_12		2.12766
10	cluster_13		10.6383
6	cluster_14		6.38298
4	cluster_15		4.25532
7	cluster_16		7.44681
1	cluster_17		1.06383
5	cluster_18		5.31915
6	cluster_19		6.38298
2	cluster_20		2.12766
3	cluster_21		3.19149
2	cluster_22		2.12766
		SUM	100
