# Supplementary material for: A cellular and molecular analysis of SoxB-driven neurogenesis in a cnidarian
Source: eLife journal article supplement (doi:10.7554/elife.78793), 2022-05-24
Supplement: supp3 [file RNA_quant_marker_overlap_analysis_normalised.xlsx]

## Sheet: Sheet1
icells	prog	soxb2	RF1	RF2	icells-CONTROL	soxb2-CONTROL	RF-CONTROL	Cluster Nr
0.934579	0	0.970874	0	0.735294	0	0	0	cluster_1
4.6729	9.57447	7.76699	6.76692	8.08824	10.5263	6.0241	8.44156	cluster_2
0	0	0	0	0	0	0	0	cluster_3
0.934579	1.06383	1.94175	0.75188	0.735294	1.05263	1.20482	1.2987	cluster_4
0	0	0	0	0	0	0	0	cluster_5
2.80374	11.7021	7.76699	8.27068	8.82353	11.5789	10.8434	11.039	cluster_6
8.41121	1.06383	2.91262	7.5188	7.35294	2.10526	1.20482	4.54545	cluster_7
0.934579	14.8936	2.91262	1.50376	1.47059	8.42105	16.8675	17.5325	cluster_8
7.47664	3.19149	1.94175	3.7594	2.94118	1.05263	2.40964	2.5974	cluster_9
1.86916	2.12766	1.94175	3.00752	1.47059	2.10526	1.20482	1.94805	cluster_10
11.215	5.31915	7.76699	9.77444	10.2941	8.42105	10.8434	9.74026	cluster_11
0.934579	2.12766	5.82524	5.26316	4.41176	1.05263	4.81928	3.8961	cluster_12
9.34579	10.6383	10.6796	9.77444	10.2941	12.6316	4.81928	6.49351	cluster_13
8.41121	6.38298	12.6214	7.5188	8.82353	3.15789	3.61446	7.79221	cluster_14
5.60748	4.25532	2.91262	3.00752	4.41176	3.15789	8.43373	1.94805	cluster_15
3.73832	7.44681	5.82524	4.51128	4.41176	5.26316	2.40964	3.8961	cluster_16
7.47664	1.06383	3.8835	4.51128	3.67647	3.15789	2.40964	2.5974	cluster_17
2.80374	5.31915	4.85437	3.7594	4.41176	9.47368	7.22892	3.8961	cluster_18
6.54206	6.38298	4.85437	7.5188	5.88235	2.10526	4.81928	3.8961	cluster_19
5.60748	2.12766	0	0.75188	2.20588	4.21053	3.61446	1.2987	cluster_20
0.934579	3.19149	4.85437	6.01504	5.88235	6.31579	6.0241	3.24675	cluster_21
9.34579	2.12766	7.76699	6.01504	3.67647	4.21053	1.20482	3.8961	cluster_22
