# Supplementary material for: A cellular and molecular analysis of SoxB-driven neurogenesis in a cnidarian
Source: eLife journal article supplement (doi:10.7554/elife.78793), 2022-05-24
Supplement: supp3 [file RNA_quant_RF1.xlsx]

## Sheet: RNA_quant_RF1.csv
overlap with cluster	cluster_name		normalised	133
0	cluster_1		0
9	cluster_2		6.76692
0	cluster_3		0
1	cluster_4		0.75188
0	cluster_5		0
11	cluster_6		8.27068
10	cluster_7		7.5188
2	cluster_8		1.50376
5	cluster_9		3.7594
4	cluster_10		3.00752
13	cluster_11		9.77444
7	cluster_12		5.26316
13	cluster_13		9.77444
10	cluster_14		7.5188
4	cluster_15		3.00752
6	cluster_16		4.51128
6	cluster_17		4.51128
5	cluster_18		3.7594
10	cluster_19		7.5188
1	cluster_20		0.75188
8	cluster_21		6.01504
8	cluster_22		6.01504
		SUM	100
