# Supplementary material for: A cellular and molecular analysis of SoxB-driven neurogenesis in a cnidarian
Source: eLife journal article supplement (doi:10.7554/elife.78793), 2022-05-24
Supplement: supp3 [file RNA_quant_RF2.xlsx]

## Sheet: RNA_quant_RF2.csv
overlap with cluster	cluster_name		normalised	136
1	cluster_1		0.735294
11	cluster_2		8.08824
0	cluster_3		0
1	cluster_4		0.735294
0	cluster_5		0
12	cluster_6		8.82353
10	cluster_7		7.35294
2	cluster_8		1.47059
4	cluster_9		2.94118
2	cluster_10		1.47059
14	cluster_11		10.2941
6	cluster_12		4.41176
14	cluster_13		10.2941
12	cluster_14		8.82353
6	cluster_15		4.41176
6	cluster_16		4.41176
5	cluster_17		3.67647
6	cluster_18		4.41176
8	cluster_19		5.88235
3	cluster_20		2.20588
8	cluster_21		5.88235
5	cluster_22		3.67647
		SUM	100
