# Supplementary material for: A cellular and molecular analysis of SoxB-driven neurogenesis in a cnidarian
Source: eLife journal article supplement (doi:10.7554/elife.78793), 2022-05-24
Supplement: supp3 [file RNA_quant_RF_CONTROL.xlsx]

## Sheet: RNA_quant_RF_CONTROL.csv
overlap with cluster	cluster_name		normalised	154
0	cluster_1		0
13	cluster_2		8.44156
0	cluster_3		0
2	cluster_4		1.2987
0	cluster_5		0
17	cluster_6		11.039
7	cluster_7		4.54545
27	cluster_8		17.5325
4	cluster_9		2.5974
3	cluster_10		1.94805
15	cluster_11		9.74026
6	cluster_12		3.8961
10	cluster_13		6.49351
12	cluster_14		7.79221
3	cluster_15		1.94805
6	cluster_16		3.8961
4	cluster_17		2.5974
6	cluster_18		3.8961
6	cluster_19		3.8961
2	cluster_20		1.2987
5	cluster_21		3.24675
6	cluster_22		3.8961
		SUM	100
