# Supplementary material for: A cellular and molecular analysis of SoxB-driven neurogenesis in a cnidarian
Source: eLife journal article supplement (doi:10.7554/elife.78793), 2022-05-24
Supplement: supp3 [file RNA_quant_soxb2.xls]

## Sheet: RNA_quant_soxb2.csv
overlap with cluster	cluster_name		normalised	103
1	cluster_1		0.970874
8	cluster_2		7.76699
0	cluster_3		0
2	cluster_4		1.94175
0	cluster_5		0
8	cluster_6		7.76699
3	cluster_7		2.91262
3	cluster_8		2.91262
2	cluster_9		1.94175
2	cluster_10		1.94175
8	cluster_11		7.76699
6	cluster_12		5.82524
11	cluster_13		10.6796
13	cluster_14		12.6214
3	cluster_15		2.91262
6	cluster_16		5.82524
4	cluster_17		3.8835
5	cluster_18		4.85437
5	cluster_19		4.85437
0	cluster_20		0
5	cluster_21		4.85437
8	cluster_22		7.76699
		SUM	100
