# Supplementary material for: A cellular and molecular analysis of SoxB-driven neurogenesis in a cnidarian
Source: eLife journal article supplement (doi:10.7554/elife.78793), 2022-05-24
Supplement: supp3 [file RNA_quant_soxb2_CONTROL.xlsx]

## Sheet: RNA_quant_soxb2_CONTROL.csv
overlap with cluster	cluster_name		normalised	83
0	cluster_1		0
5	cluster_2		6.0241
0	cluster_3		0
1	cluster_4		1.20482
0	cluster_5		0
9	cluster_6		10.8434
1	cluster_7		1.20482
14	cluster_8		16.8675
2	cluster_9		2.40964
1	cluster_10		1.20482
9	cluster_11		10.8434
4	cluster_12		4.81928
4	cluster_13		4.81928
3	cluster_14		3.61446
7	cluster_15		8.43373
2	cluster_16		2.40964
2	cluster_17		2.40964
6	cluster_18		7.22892
4	cluster_19		4.81928
3	cluster_20		3.61446
5	cluster_21		6.0241
1	cluster_22		1.20482
		SUM	100
