# Supplementary material for: A cellular and molecular analysis of SoxB-driven neurogenesis in a cnidarian
Source: eLife journal article supplement (doi:10.7554/elife.78793), 2022-05-24
Supplement: supp3 [file S_v_G.xlsx]

## Sheet: S_v_G.csv
overlap with cluster	cluster_name		normalised	31
0	cluster_1		0
1	cluster_2		3.22581
0	cluster_3		0
0	cluster_4		0
0	cluster_5		0
1	cluster_6		3.22581
2	cluster_7		6.45161
2	cluster_8		6.45161
3	cluster_9		9.67742
0	cluster_10		0
6	cluster_11		19.3548
1	cluster_12		3.22581
5	cluster_13		16.129
1	cluster_14		3.22581
2	cluster_15		6.45161
1	cluster_16		3.22581
4	cluster_17		12.9032
0	cluster_18		0
0	cluster_19		0
1	cluster_20		3.22581
1	cluster_21		3.22581
0	cluster_22		0
		SUM	100
