# Supplementary material for: A cellular and molecular analysis of SoxB-driven neurogenesis in a cnidarian
Source: eLife journal article supplement (doi:10.7554/elife.78793), 2022-05-24
Supplement: supp3 [file soxB2.xlsx]

## Sheet: soxB2.csv
overlap with cluster	cluster_name		normalised	26
0	cluster_1		0
0	cluster_2		0
0	cluster_3		0
0	cluster_4		0
0	cluster_5		0
0	cluster_6		0
0	cluster_7		0
0	cluster_8		0
2	cluster_9		7.69231
0	cluster_10		0
1	cluster_11		3.84615
2	cluster_12		7.69231
4	cluster_13		15.3846
5	cluster_14		19.2308
0	cluster_15		0
2	cluster_16		7.69231
3	cluster_17		11.5385
1	cluster_18		3.84615
3	cluster_19		11.5385
0	cluster_20		0
1	cluster_21		3.84615
2	cluster_22		7.69231
		SUM	100
