# Supplementary material for: A cellular and molecular analysis of SoxB-driven neurogenesis in a cnidarian
Source: eLife. 2022 May 24;11:e78793. doi: 10.7554/eLife.78793 (PMC9173746; doi:10.7554/eLife.78793)
Supplement: Supplementary file 2. [file elife-78793-supp2.xlsx]

## Sheet: RFamide-low vs RFamide-high
gene_id	log2_fc	log2_FC_SE	pval	padj	transcript_id	best_BLAST_hit	eval	pannzer_description	pannzer_gene_name	molecular_function	biological_processes	cellular_component
GENE.evgHyS_ScswcV5_4367.g20353.t1~~evgHyS_ScswcV5_4367.g20353.t1.p1	-11.5618	0.752838	3.14907e-53	5.45923e-49	evgHyS_ScswcV5_4367.g20353.t1.p1	PREDICTED: fibrinogen alpha-1 chain-like isoform X2 [Salmo salar]	2.34e-13	NA	NA	NA	NA	NA
GENE.evgtrinLocDN38197c0g1t6~~evgtrinLocDN38197c0g1t6.p1	-11.2675	0.956301	4.81291e-32	4.17183e-28	evgtrinLocDN38197c0g1t6.p1	hypothetical protein [Flavobacterium sp. Root901]	0.036	NA	NA	NA	NA	NA
GENE.evgtrinLocDN4684c1g4t1~~evgtrinLocDN4684c1g4t1.p1	-9.20074	0.808837	5.55313e-30	3.20897e-26	evgtrinLocDN4684c1g4t1.p1	PREDICTED: plasma kallikrein-like [Hydra vulgaris]	4.08e-67	Similar to Plasma kallikrein precursor (Plasma prekallikrein) (Kininogenin) (Fletcher factor)	NA	serine-type endopeptidase activity	blood coagulation, intrinsic pathway	extracellular region
GENE.evgHyS_ScswcV5_457.g1627.t1~~evgHyS_ScswcV5_457.g1627.t1.p1	-13.647	1.26516	3.97646e-27	1.7234e-23	evgHyS_ScswcV5_457.g1627.t1.p1	Protein IWS1, partial [Aptenodytes forsteri]	2.48e-59	NA	NA	NA	NA	NA
GENE.evgMSTRG.15957.1~~evgMSTRG.15957.1.p1	-7.30127	0.709531	7.79442e-25	2.70248e-21	evgMSTRG.15957.1.p1	PREDICTED: ras and EF-hand domain-containing protein homolog [Hydra vulgaris]	0	EF-hand calcium-binding domain-containing protein 4A	NA	GTPase activity	Rab protein signal transduction	neuronal cell body
GENE.evgHyS_ScswcV5_2707.g11136.t1~~evgHyS_ScswcV5_2707.g11136.t1.p1	-9.69178	0.950031	1.95167e-24	5.63902e-21	evgHyS_ScswcV5_2707.g11136.t1.p1	hypothetical protein IQ07DRAFT_585183 [Pyrenochaeta sp. DS3sAY3a]	1.02e-05	NA	NA	NA	NA	NA
GENE.evgHyS_ScswcV5_2444.g9401.t1~~evgHyS_ScswcV5_2444.g9401.t1.p1	-9.19918	0.921738	1.85976e-23	4.60582e-20	evgHyS_ScswcV5_2444.g9401.t1.p1	PREDICTED: fibroblast growth factor receptor 2-like, partial [Hydra vulgaris]	4.81e-101	NA	NA	NA	NA	NA
GENE.evgHyS_ScswcV5_2444.g9339.t1~~evgHyS_ScswcV5_2444.g9339.t1.p1	-7.83444	0.920285	1.69392e-17	3.67071e-14	evgHyS_ScswcV5_2444.g9339.t1.p1	PREDICTED: fibroblast growth factor receptor 2-like [Acropora digitifera]	1.82e-108	NA	NA	NA	NA	NA
GENE.evgHyS_ScswcV5_4378.g20892.t1~~evgHyS_ScswcV5_4378.g20892.t1.p1	-7.17799	0.87126	1.74196e-16	3.35541e-13	evgHyS_ScswcV5_4378.g20892.t1.p1	Ash [Hydractinia echinata]	7.98e-87	Cnidarian achaete-scute homolog	NA	protein dimerization activity	regulation of transcription by RNA polymerase II	neuronal cell body
GENE.evgHyS_ScswcV5_1088.g4210.t1~~evgHyS_ScswcV5_1088.g4210.t1.p1	-23.1918	2.82108	2.01999e-16	3.50186e-13	evgHyS_ScswcV5_1088.g4210.t1.p1	PREDICTED: macrophage mannose receptor 1-like [Acropora digitifera]	5.39e-05	NA	NA	NA	NA	NA
GENE.evgMSTRG.116101.3~~evgMSTRG.116101.3.p1	-6.15059	0.779964	3.12688e-15	4.4819e-12	evgMSTRG.116101.3.p1	PREDICTED: neuronal acetylcholine receptor subunit alpha-3-like [Hydra vulgaris]	2.62e-149	Nicotinic acetylcholine receptor subunit type G	NA	acetylcholine-gated cation-selective channel activity	excitatory postsynaptic potential	postsynaptic membrane
GENE.evgMSTRG.119948.1~~evgMSTRG.119948.1.p1	-9.96847	1.27335	4.93519e-15	6.11117e-12	evgMSTRG.119948.1.p1	PREDICTED: cysteine-rich motor neuron 1 protein-like [Branchiostoma belcheri]	7.64e-07	NA	NA	NA	NA	NA
GENE.evgHyS_ScswcV5_2988.g11739.t1~~evgHyS_ScswcV5_2988.g11739.t1.p1	-9.99036	1.31173	2.6134e-14	3.02039e-11	evgHyS_ScswcV5_2988.g11739.t1.p1	PREDICTED: uncharacterized protein LOC100197998 [Hydra vulgaris]	1.94e-07	NA	NA	NA	NA	NA
GENE.evgHyS_ScswcV5_4509.g21416.t1~~evgHyS_ScswcV5_4509.g21416.t1.p1	-6.31702	0.838738	5.01306e-14	5.11214e-11	evgHyS_ScswcV5_4509.g21416.t1.p1	venom toxin [Hemiscorpius lepturus]	1.58e-13	Cysteine-rich motor neuron 1 protein (Fragment)	CRIM1	insulin-like growth factor binding	negative regulation of endopeptidase activity	extracellular region
GENE.evgtrinLocDN10546c0g5t1~~evgtrinLocDN10546c0g5t1.p1	-22.114	2.94279	5.70654e-14	5.49603e-11	evgtrinLocDN10546c0g5t1.p1	hypothetical protein AWC38_SpisGene21476 [Stylophora pistillata]	1.6e-40	NA	NA	NA	NA	NA
GENE.evgMSTRG.90414.6~~evgMSTRG.90414.6.p1	-5.79806	0.781248	1.15779e-13	1.05639e-10	evgMSTRG.90414.6.p1	PREDICTED: uncharacterized protein C05D11.1-like [Hydra vulgaris]	4.08e-47	NA	NA	NA	NA	NA
GENE.evgHyS_ScswcV5_17.g78.t1~~evgHyS_ScswcV5_17.g78.t1.p1	-4.37011	0.600508	3.40425e-13	2.9508e-10	evgHyS_ScswcV5_17.g78.t1.p1	predicted protein [Nematostella vectensis]	3.84e-100	NA	NA	NA	NA	NA
GENE.evgtrinLocDN64182c0g1t4~~evgtrinLocDN64182c0g1t4.p2	-10.5888	1.48074	8.61133e-13	7.10885e-10	evgtrinLocDN64182c0g1t4.p2	hypothetical protein [Papillibacter cinnamivorans]	2.3	NA	NA	NA	NA	NA
GENE.evgMSTRG.131677.1~~evgMSTRG.131677.1.p1	-9.0828	1.29201	2.06552e-12	1.62763e-09	evgMSTRG.131677.1.p1	PREDICTED: extracellular calcium-sensing receptor-like [Hydra vulgaris]	6.13e-163	NA	NA	NA	NA	NA
GENE.evgHyS_ScswcV5_664.g2805.t1~~evgHyS_ScswcV5_664.g2805.t1.p1	-5.81839	0.832314	2.73665e-12	1.97678e-09	evgHyS_ScswcV5_664.g2805.t1.p1	coiled-coil domain-containing protein 33-like [Stylophora pistillata]	9.69e-33	NA	NA	NA	NA	NA
GENE.evgtrinLocDN11732c0g2t2~~evgtrinLocDN11732c0g2t2.p1	-6.98803	1.0426	2.04905e-11	1.42089e-08	evgtrinLocDN11732c0g2t2.p1	hypothetical protein pdam_00016360 [Pocillopora damicornis]	2.56e-118	Voltage-dependent calcium channel subunit alpha-2/delta-4 (Fragment)	NA	NA	NA	integral component of membrane
GENE.evgtrinLocDN706c1g2t3~~evgtrinLocDN706c1g2t3.p1	-6.31941	0.949182	2.78066e-11	1.85406e-08	evgtrinLocDN706c1g2t3.p1	predicted protein [Nematostella vectensis]	4.72e-94	NA	NA	NA	NA	NA
GENE.evgHyS_ScswcV5_3339.g14057.t1~~evgHyS_ScswcV5_3339.g14057.t1.p1	-4.8214	0.725478	3.01537e-11	1.93609e-08	evgHyS_ScswcV5_3339.g14057.t1.p1	PREDICTED: tyrosyl-DNA phosphodiesterase 1-like [Hydra vulgaris]	1.25e-142	NA	NA	NA	NA	NA
GENE.evgHyS_ScswcV5_3896.g17191.t1~~evgHyS_ScswcV5_3896.g17191.t1.p1	-7.45765	1.1262	3.5439e-11	2.19418e-08	evgHyS_ScswcV5_3896.g17191.t1.p1	PREDICTED: uncharacterized protein LOC105845533 [Hydra vulgaris]	1.46e-45	NA	NA	NA	NA	NA
GENE.evgHyS_ScswcV5_4270.g19758.t1~~evgHyS_ScswcV5_4270.g19758.t1.p1	-9.99462	1.52577	5.73218e-11	3.42666e-08	evgHyS_ScswcV5_4270.g19758.t1.p1	PREDICTED: uncharacterized protein LOC100204652 isoform X1 [Hydra vulgaris]	2.35e-67	NA	NA	NA	NA	NA
GENE.evgHyS_ScswcV5_1783.g7260.t1~~evgHyS_ScswcV5_1783.g7260.t1.p1	-9.99308	1.5517	1.1942e-10	6.69887e-08	evgHyS_ScswcV5_1783.g7260.t1.p1	hypothetical protein EPR50_G00126520 [Perca flavescens]	1.61e-39	Aquaporin	NA	channel activity	transmembrane transport	integral component of membrane
GENE.evgHyS_ScswcV5_3978.g17863.t1~~evgHyS_ScswcV5_3978.g17863.t1.p1	-7.85522	1.27035	6.26916e-10	3.10521e-07	evgHyS_ScswcV5_3978.g17863.t1.p1	atrial natriuretic peptide receptor 1-like [Orbicella faveolata]	0	Guanylate cyclase	NA	guanylate cyclase activity	cGMP biosynthetic process	integral component of membrane
GENE.evgHyS_ScswcV5_3153.g12412.t1~~evgHyS_ScswcV5_3153.g12412.t1.p1	-6.43558	1.04675	7.83759e-10	3.77424e-07	evgHyS_ScswcV5_3153.g12412.t1.p1	PREDICTED: uncharacterized protein LOC100205211 [Hydra vulgaris]	2.46e-166	NA	NA	NA	NA	NA
GENE.evgMSTRG.114516.1~~evgMSTRG.114516.1.p2	-8.00913	1.30966	9.63063e-10	4.51234e-07	evgMSTRG.114516.1.p2	unnamed protein product [Anisakis simplex]	6.3	NA	NA	NA	NA	NA
GENE.evgHyS_ScswcV5_2604.g10730.t1~~evgHyS_ScswcV5_2604.g10730.t1.p1	-6.30726	1.04436	1.54741e-09	6.87843e-07	evgHyS_ScswcV5_2604.g10730.t1.p1	PREDICTED: uncharacterized protein LOC105850084 [Hydra vulgaris]	0.24	NA	NA	NA	NA	NA
GENE.evgHyS_ScswcV5_3298.g13424.t1~~evgHyS_ScswcV5_3298.g13424.t1.p1	-23.0515	3.90806	3.66892e-09	1.37696e-06	evgHyS_ScswcV5_3298.g13424.t1.p1	uncharacterized protein LOC100211719 precursor [Hydra vulgaris]	5.85e-50	Endonuclease	NA	exonuclease activity	nucleic acid phosphodiester bond hydrolysis	NA
GENE.evgtrinLocDN29857c0g1t4~~evgtrinLocDN29857c0g1t4.p1	-5.07305	0.86048	3.73311e-09	1.37696e-06	evgtrinLocDN29857c0g1t4.p1	hypothetical protein AB205_0165870 [Rana catesbeiana]	4.87e-49	NA	NA	NA	NA	NA
GENE.evgHyS_ScswcV5_4378.g20850.t1~~evgHyS_ScswcV5_4378.g20850.t1.p1	-5.72876	0.973337	3.96397e-09	1.43165e-06	evgHyS_ScswcV5_4378.g20850.t1.p1	PREDICTED: uncharacterized protein LOC100203426 isoform X1 [Hydra vulgaris]	0	NA	NA	NA	NA	NA
GENE.evgHyS_ScswcV5_50.g284.t1~~evgHyS_ScswcV5_50.g284.t1.p1	-22.8857	3.90807	4.74121e-09	1.67742e-06	evgHyS_ScswcV5_50.g284.t1.p1	transcription factor Ash2 [Podocoryna carnea]	1.12e-61	Achaete-scute complex protein 2	ASCL3	protein dimerization activity	regulation of transcription by RNA polymerase II	transcription factor complex
GENE.evgHyS_ScswcV5_3339.g14071.t1~~evgHyS_ScswcV5_3339.g14071.t1.p1	-4.87995	0.836755	5.47693e-09	1.89896e-06	evgHyS_ScswcV5_3339.g14071.t1.p1	PREDICTED: keratin-associated protein 10-4-like isoform X2 [Hydra vulgaris]	1.24e-16	B-hordein	NA	nutrient reservoir activity	transcription elongation from RNA polymerase II promoter	Cdc73/Paf1 complex
GENE.evgMSTRG.25563.4~~evgMSTRG.25563.4.p1	-7.6708	1.31908	6.05337e-09	2.05767e-06	evgMSTRG.25563.4.p1	Extracellular calcium-sensing receptor [Stylophora pistillata]	1.72e-25	NA	NA	NA	NA	NA
GENE.evgtrinLocDN6229c1g1t5~~evgtrinLocDN6229c1g1t5.p1	-5.62271	0.970643	6.92328e-09	2.30812e-06	evgtrinLocDN6229c1g1t5.p1	Alpha-tectorin, partial [Anabarilius grahami]	3.58e-70	NA	NA	NA	NA	NA
GENE.evgHyS_ScswcV5_3896.g17165.t1~~evgHyS_ScswcV5_3896.g17165.t1.p1	-5.38566	0.935178	8.463e-09	2.7682e-06	evgHyS_ScswcV5_3896.g17165.t1.p1	PREDICTED: protein kinase C and casein kinase substrate in neurons protein 1-like [Hydra vulgaris]	2.8e-90	Kinase C and casein kinase substrate in neurons protein (Fragment)	PACSIN3	kinase activity	plasma membrane tubulation	cytoskeleton
GENE.evgHyS_ScswcV5_2750.g11446.t1~~evgHyS_ScswcV5_2750.g11446.t1.p1	-9.15143	1.6024	1.12264e-08	3.47536e-06	NA	NA	NA	NA	NA	NA	NA	NA
GENE.evgMSTRG.14970.1~~evgMSTRG.14970.1.p1	-4.04126	0.71117	1.32706e-08	4.03611e-06	evgMSTRG.14970.1.p1	MULTISPECIES: hypothetical protein [Marinobacter]	0.84	NA	NA	NA	NA	NA
GENE.evgtrinLocDN30446c1g1t16~~evgtrinLocDN30446c1g1t16.p1	-10.1146	1.8294	3.22224e-08	9.00981e-06	evgtrinLocDN30446c1g1t16.p1	gamma-aminobutyric acid receptor subunit beta-1-like [Stylophora pistillata]	4.61e-51	Gamma-aminobutyric acid receptor subunit beta	NA	extracellular ligand-gated ion channel activity	ion transmembrane transport	plasma membrane
GENE.evgHyS_ScswcV5_3574.g15637.t1~~evgHyS_ScswcV5_3574.g15637.t1.p1	-9.66157	1.74842	3.27825e-08	9.02091e-06	evgHyS_ScswcV5_3574.g15637.t1.p1	PREDICTED: leucine-rich repeat-containing protein 74A-like [Hydra vulgaris]	4.22e-126	leucine-rich repeat-containing protein 74B	NA	calcium ion binding	NA	NA
GENE.evgMSTRG.20581.1~~evgMSTRG.20581.1.p1	-11.0544	2.00487	3.51243e-08	9.5143e-06	evgMSTRG.20581.1.p1	adenosine receptor A2a-like [Orbicella faveolata]	0.12	NA	NA	NA	NA	NA
GENE.evgHyS_ScswcV5_644.g2371.t1~~evgHyS_ScswcV5_644.g2371.t1.p1	-5.17269	0.947272	4.74488e-08	1.2655e-05	evgHyS_ScswcV5_644.g2371.t1.p1	PREDICTED: endochitinase 4-like [Hydra vulgaris]	0	Glycoside hydrolase	CHN50	chitinase activity	chitin catabolic process	integral component of membrane
GENE.evgMSTRG.78944.7~~evgMSTRG.78944.7.p1	-4.64138	0.850962	4.91745e-08	1.29165e-05	evgMSTRG.78944.7.p1	PREDICTED: uncharacterized protein LOC100212316 [Hydra vulgaris]	0	von Willebrand factor A domain-containing protein 7	NA	calcium ion binding	negative regulation of angiogenesis	membrane attack complex
GENE.evgHyS_ScswcV5_457.g1680.t1~~evgHyS_ScswcV5_457.g1680.t1.p1	-6.08638	1.12074	5.61349e-08	1.43111e-05	evgHyS_ScswcV5_457.g1680.t1.p1	acid-sensing ion channel 4-like [Stylophora pistillata]	1.39e-22	NA	NA	NA	NA	NA
GENE.evgHyS_ScswcV5_3964.g17506.t1~~evgHyS_ScswcV5_3964.g17506.t1.p1	-5.9549	1.10576	7.23141e-08	1.79091e-05	evgHyS_ScswcV5_3964.g17506.t1.p1	major facilitator superfamily domain-containing protein 12-like isoform X2 [Exaiptasia pallida]	1.2e-62	NA	NA	NA	NA	NA
GENE.evgMSTRG.39001.1~~evgMSTRG.39001.1.p1	-4.4386	0.827379	8.1108e-08	1.98041e-05	evgMSTRG.39001.1.p1	TPA_exp: minicollagen 1 [Hydractinia echinata]	2.55e-09	Mini-collagen	NA	extracellular matrix structural constituent	extracellular matrix organization	collagen trimer
GENE.evgHyS_ScswcV5_1983.g8090.t1~~evgHyS_ScswcV5_1983.g8090.t1.p1	-6.44615	1.20598	9.03405e-08	2.10369e-05	evgHyS_ScswcV5_1983.g8090.t1.p1	PREDICTED: spindle assembly abnormal protein 6 homolog [Hydra vulgaris]	3.12e-137	Spindle assembly abnormal protein 6	SASS6	cytoskeletal protein binding	centriole replication	deuterosome
GENE.evgHyS_ScswcV5_4418.g21052.t1~~evgHyS_ScswcV5_4418.g21052.t1.p1	-5.35255	1.00163	9.10038e-08	2.10369e-05	evgHyS_ScswcV5_4418.g21052.t1.p1	PREDICTED: probable glutamate receptor [Hydra vulgaris]	5.27e-51	NA	NA	NA	NA	NA
GENE.evgtrinLocDN31559c0g1t14~~evgtrinLocDN31559c0g1t14.p1	-9.98943	1.86935	9.10111e-08	2.10369e-05	evgtrinLocDN31559c0g1t14.p1	PREDICTED: tigger transposable element-derived protein 4-like [Acropora digitifera]	2.71e-19	NA	NA	NA	NA	NA
GENE.evgMSTRG.44165.1~~evgMSTRG.44165.1.p1	-9.08769	1.74681	1.96685e-07	4.37146e-05	evgMSTRG.44165.1.p1	adenosine receptor A3-like [Stylophora pistillata]	0.006	NA	NA	NA	NA	NA
GENE.evgHyS_ScswcV5_17.g30.t1~~evgHyS_ScswcV5_17.g30.t1.p1	-10.0355	1.93515	2.14962e-07	4.71718e-05	NA	NA	NA	NA	NA	NA	NA	NA
GENE.evgHyS_ScswcV5_4475.g21251.t1~~evgHyS_ScswcV5_4475.g21251.t1.p1	-6.59789	1.27575	2.31892e-07	5.02509e-05	evgHyS_ScswcV5_4475.g21251.t1.p1	predicted protein [Nematostella vectensis]	3.38e-99	NA	NA	NA	NA	NA
GENE.evgHyS_ScswcV5_704.g3231.t1~~evgHyS_ScswcV5_704.g3231.t1.p1	-6.75514	1.32126	3.17685e-07	6.55641e-05	NA	NA	NA	NA	NA	NA	NA	NA
GENE.evgHyS_ScswcV5_66.g573.t1~~evgHyS_ScswcV5_66.g573.t1.p1	-8.81329	1.72704	3.34082e-07	6.65739e-05	NA	NA	NA	NA	NA	NA	NA	NA
GENE.evgtrinLocDN4524c3g1t11~~evgtrinLocDN4524c3g1t11.p1	-6.30309	1.23521	3.34591e-07	6.65739e-05	evgtrinLocDN4524c3g1t11.p1	adrenocorticotropic hormone receptor-like [Pocillopora damicornis]	0.011	NA	NA	NA	NA	NA
GENE.evgHyS_ScswcV5_2461.g9647.t1~~evgHyS_ScswcV5_2461.g9647.t1.p1	-5.14434	1.01207	3.71593e-07	7.07904e-05	evgHyS_ScswcV5_2461.g9647.t1.p1	PREDICTED: uncharacterized protein DDB_G0284459-like [Branchiostoma belcheri]	7.14e-13	NA	NA	NA	NA	NA
GENE.evgHyS_ScswcV5_1983.g8087.t1~~evgHyS_ScswcV5_1983.g8087.t1.p1	-4.35344	0.863407	4.60299e-07	8.39973e-05	evgHyS_ScswcV5_1983.g8087.t1.p1	PREDICTED: uncharacterized protein LOC101239033, partial [Hydra vulgaris]	1.94e-94	NA	NA	NA	NA	NA
GENE.evgHyS_ScswcV5_3094.g12176.t1~~evgHyS_ScswcV5_3094.g12176.t1.p1	-7.05066	1.40121	4.85762e-07	8.77204e-05	evgHyS_ScswcV5_3094.g12176.t1.p1	allorecognition 1 [Hydractinia symbiolongicarpus]	2.35e-11	NA	NA	NA	NA	NA
GENE.evgHyS_ScswcV5_4261.g19280.t1~~evgHyS_ScswcV5_4261.g19280.t1.p1	-7.27669	1.47049	7.47951e-07	0.000129665	evgHyS_ScswcV5_4261.g19280.t1.p1	uncharacterized protein LOC111323405 isoform X2 [Stylophora pistillata]	5.76e-60	Rho guanine nucleotide exchange factor 25	ARHGEF25	Rho guanyl-nucleotide exchange factor activity	regulation of Rho protein signal transduction	cytoskeleton
GENE.evgtrinLocDN6210c0g1t3~~evgtrinLocDN6210c0g1t3.p1	-3.20668	0.649043	7.78684e-07	0.000133656	evgtrinLocDN6210c0g1t3.p1	endothelin-converting enzyme 1-like [Hydra vulgaris]	0	Membrane metallo-endopeptidase	MME	metalloendopeptidase activity	proteolysis	brush border
GENE.evgHyS_ScswcV5_4378.g20717.t1~~evgHyS_ScswcV5_4378.g20717.t1.p1	-6.1232	1.24089	8.03459e-07	0.000136557	evgHyS_ScswcV5_4378.g20717.t1.p1	PREDICTED: uncharacterized protein LOC100206840 isoform X1 [Hydra vulgaris]	3.37e-163	NA	NA	NA	NA	NA
GENE.evgHyS_ScswcV5_3298.g13554.t1~~evgHyS_ScswcV5_3298.g13554.t1.p1	-7.37958	1.49664	8.19122e-07	0.000137867	evgHyS_ScswcV5_3298.g13554.t1.p1	PREDICTED: protein FAN-like [Hydra vulgaris]	0	Factor associated with neutral sphingomyelinase activation	NSMAF	sphingomyelin phosphodiesterase activator activity	leukocyte chemotaxis involved in immune response	cytosol
GENE.evgtrinLocDN29494c0g1t2~~evgtrinLocDN29494c0g1t2.p1	-5.0389	1.02376	8.56887e-07	0.000142836	evgtrinLocDN29494c0g1t2.p1	PREDICTED: uncharacterized protein LOC105847494, partial [Hydra vulgaris]	3.7	NA	NA	NA	NA	NA
GENE.evgHyS_ScswcV5_1734.g6065.t1~~evgHyS_ScswcV5_1734.g6065.t1.p1	-7.7806	1.60759	1.29885e-06	0.000212423	evgHyS_ScswcV5_1734.g6065.t1.p1	PREDICTED: nudix hydrolase 24, chloroplastic-like isoform X2 [Hydra vulgaris]	2.52e-174	Isopentenyl-diphosphate delta-isomerase	NA	8-oxo-dGDP phosphatase activity	phosphorylation	cytosol
GENE.evgMSTRG.62977.2~~evgMSTRG.62977.2.p1	-5.3658	1.11361	1.44713e-06	0.000234007	evgMSTRG.62977.2.p1	PREDICTED: uncharacterized protein LOC100209382 [Hydra vulgaris]	5.65e-70	NA	NA	NA	NA	NA
GENE.evgHyS_ScswcV5_4378.g20884.t1~~evgHyS_ScswcV5_4378.g20884.t1.p1	-4.22086	0.876254	1.45782e-06	0.000234007	evgHyS_ScswcV5_4378.g20884.t1.p1	PREDICTED: mucin-16-like [Hydra vulgaris]	1.08e-85	NA	NA	NA	NA	NA
GENE.evgtrinLocDN84010c0g1t7~~evgtrinLocDN84010c0g1t7.p1	-5.93584	1.23751	1.61385e-06	0.000256676	evgtrinLocDN84010c0g1t7.p1	PREDICTED: rhodopsin, GQ-coupled-like [Hydra vulgaris]	2.42e-26	NA	NA	NA	NA	NA
GENE.evgtrinLocDN12728c0g1t9~~evgtrinLocDN12728c0g1t9.p2	-9.00501	1.88556	1.79013e-06	0.000282124	NA	NA	NA	NA	NA	NA	NA	NA
GENE.evgtrinLocDN24389c1g1t4~~evgtrinLocDN24389c1g1t4.p4	-5.10788	1.07026	1.81895e-06	0.000282224	NA	NA	NA	NA	NA	NA	NA	NA
GENE.evgHyS_ScswcV5_4062.g18422.t1~~evgHyS_ScswcV5_4062.g18422.t1.p1	-4.10385	0.864025	2.03733e-06	0.000312558	evgHyS_ScswcV5_4062.g18422.t1.p1	uncharacterized protein C4orf22 homolog isoform X1 [Orbicella faveolata]	5.03e-129	cilia- and flagella-associated protein 299	CFAP299	NA	NA	motile cilium
GENE.evgHyS_ScswcV5_2427.g9210.t1~~evgHyS_ScswcV5_2427.g9210.t1.p1	-3.46125	0.733275	2.35547e-06	0.000358196	evgHyS_ScswcV5_2427.g9210.t1.p1	PREDICTED: unconventional myosin-VI-like [Hydra vulgaris]	0	Unconventional myosin-VI	MYO6	motor activity	DNA damage response, signal transduction by p53 class mediator	myosin complex
GENE.evgtrinLocDN14119c0g1t6~~evgtrinLocDN14119c0g1t6.p2	-9.86998	2.10103	2.63133e-06	0.000393247	evgtrinLocDN14119c0g1t6.p2	hypothetical protein AC249_AIPGENE21915, partial [Exaiptasia pallida]	2.97e-08	NA	NA	NA	NA	NA
GENE.evgMSTRG.128787.1~~evgMSTRG.128787.1.p1	-9.17765	1.95843	2.78294e-06	0.000408856	evgMSTRG.128787.1.p1	PREDICTED: histamine H2 receptor-like [Acropora digitifera]	0.003	NA	NA	NA	NA	NA
GENE.evgHyS_ScswcV5_3094.g12284.t1~~evgHyS_ScswcV5_3094.g12284.t1.p1	-6.43544	1.37523	2.87526e-06	0.000415379	evgHyS_ScswcV5_3094.g12284.t1.p1	Contactin-associated protein 4 [Hydra vulgaris]	5.91e-150	NA	NA	NA	NA	NA
GENE.evgMSTRG.114058.1~~evgMSTRG.114058.1.p1	-9.98413	2.13694	2.98047e-06	0.00042702	evgMSTRG.114058.1.p1	epoxide hydrolase [Sphingomonas sp. KC8]	0.84	NA	NA	NA	NA	NA
GENE.evgtrinLocDN303c1g1t14~~evgtrinLocDN303c1g1t14.p1	-4.28219	0.919739	3.22599e-06	0.000458408	evgtrinLocDN303c1g1t14.p1	kinesin-like protein KIN-14Q isoform X1 [Hevea brasiliensis]	3.6	NA	NA	NA	NA	NA
GENE.evgMSTRG.62340.1~~evgMSTRG.62340.1.p1	-3.6276	0.782181	3.5214e-06	0.000496317	evgMSTRG.62340.1.p1	predicted protein [Nematostella vectensis]	4.23e-97	NA	NA	NA	NA	NA
GENE.evgMSTRG.108646.1~~evgMSTRG.108646.1.p1	-6.10784	1.31813	3.59159e-06	0.000502127	evgMSTRG.108646.1.p1	adenosine receptor A2b-like [Orbicella faveolata]	1.13e-08	NA	NA	NA	NA	NA
GENE.evgMSTRG.132763.1~~evgMSTRG.132763.1.p1	-8.38748	1.81317	3.73056e-06	0.000517384	evgMSTRG.132763.1.p1	muscle, skeletal receptor tyrosine-protein kinase [Gouania willdenowi]	1.85e-14	NA	NA	NA	NA	NA
GENE.evgHyS_ScswcV5_1325.g4933.t1~~evgHyS_ScswcV5_1325.g4933.t1.p1	-7.04156	1.52468	3.86748e-06	0.000532117	evgHyS_ScswcV5_1325.g4933.t1.p1	PREDICTED: endo-1,4-beta-xylanase A-like [Acropora digitifera]	4.09e-145	Glycoside hydrolase	NA	hydrolase activity, hydrolyzing O-glycosyl compounds	carbohydrate metabolic process	integral component of membrane
GENE.evgMSTRG.126141.9~~evgMSTRG.126141.9.p1	-5.01567	1.09018	4.2096e-06	0.000564489	evgMSTRG.126141.9.p1	minicollagen 8 precursor [Hydra vulgaris]	0.07	Mini-collagen	NA	extracellular matrix structural constituent	epithelial cell proliferation	collagen trimer
GENE.evgMSTRG.101606.1~~evgMSTRG.101606.1.p1	-3.83851	0.834531	4.23302e-06	0.000564489	evgMSTRG.101606.1.p1	PREDICTED: gamma-glutamyltranspeptidase 1-like [Hydra vulgaris]	1.21e-172	Gamma-glutamyltranspeptidase periplasmic	GGT	glutathione hydrolase activity	glutathione catabolic process	integral component of membrane
GENE.evgHyS_ScswcV5_1750.g6573.t1~~evgHyS_ScswcV5_1750.g6573.t1.p1	-6.86817	1.49564	4.38753e-06	0.000576229	evgHyS_ScswcV5_1750.g6573.t1.p1	PREDICTED: mast cell carboxypeptidase A-like [Hydra vulgaris]	1.62e-71	Zinc carboxypeptidase	NA	metallocarboxypeptidase activity	proteolysis	extracellular space
GENE.evgMSTRG.40081.3~~evgMSTRG.40081.3.p1	-9.71211	2.1203	4.63775e-06	0.000604511	evgMSTRG.40081.3.p1	hypothetical protein FIESC28_06008 [Fusarium sp. FIESC_28]	7.1	NA	NA	NA	NA	NA
GENE.evgMSTRG.124673.2~~evgMSTRG.124673.2.p1	-4.69593	1.02601	4.71928e-06	0.000610549	evgMSTRG.124673.2.p1	PREDICTED: uncharacterized protein LOC105846392 [Hydra vulgaris]	1.1e-14	NA	NA	NA	NA	NA
GENE.evgHyS_ScswcV5_3470.g14685.t1~~evgHyS_ScswcV5_3470.g14685.t1.p1	-7.398	1.61762	4.79908e-06	0.000613576	evgHyS_ScswcV5_3470.g14685.t1.p1	PREDICTED: low choriolytic enzyme-like [Hydra vulgaris]	3.31e-86	Metalloendopeptidase	NA	metalloendopeptidase activity	proteolysis	membrane
GENE.evgtrinLocDN20232c0g1t3~~evgtrinLocDN20232c0g1t3.p1	-7.73675	1.69192	4.81347e-06	0.000613576	evgtrinLocDN20232c0g1t3.p1	PREDICTED: LOW QUALITY PROTEIN: uncharacterized protein LOC100207700 [Hydra vulgaris]	2.12e-17	NA	NA	NA	NA	NA
GENE.evgHyS_ScswcV5_4915.g21995.t1~~evgHyS_ScswcV5_4915.g21995.t1.p1	-3.71297	0.816202	5.38817e-06	0.000676879	evgHyS_ScswcV5_4915.g21995.t1.p1	PREDICTED: uncharacterized protein LOC102810139 [Saccoglossus kowalevskii]	1.52e-85	NA	NA	NA	NA	NA
GENE.evgtrinLocDN6531c0g1t8~~evgtrinLocDN6531c0g1t8.p1	-5.25043	1.15561	5.5344e-06	0.000685316	evgtrinLocDN6531c0g1t8.p1	nopaline dehydrogenase [Fusibacter sp. A1]	8.33e-65	Nopaline dehydrogenase	NA	glycerol-3-phosphate dehydrogenase [NAD(P)+] activity	glycerol-3-phosphate catabolic process	cytoplasm
GENE.evgMSTRG.66037.2~~evgMSTRG.66037.2.p1	-5.39249	1.19341	6.22594e-06	0.00076009	evgMSTRG.66037.2.p1	PREDICTED: uncharacterized protein LOC100201983 [Hydra vulgaris]	4.29e-101	NA	NA	NA	NA	NA
GENE.evgMSTRG.16951.1~~evgMSTRG.16951.1.p1	-3.89142	0.862564	6.43845e-06	0.000780538	evgMSTRG.16951.1.p1	PREDICTED: zinc finger protein 528-like [Hydra vulgaris]	2.62e-141	Zinc finger protein 226	NA	nucleic acid binding	negative regulation of transcription by RNA polymerase II	nucleus
GENE.evgMSTRG.9687.1~~evgMSTRG.9687.1.p1	-8.33595	1.85245	6.79675e-06	0.00081261	evgMSTRG.9687.1.p1	FAD-dependent thymidylate synthase [Helicobacter sp. 12S02634-8]	0.096	NA	NA	NA	NA	NA
GENE.evgHyS_ScswcV5_4418.g21107.t1~~evgHyS_ScswcV5_4418.g21107.t1.p1	-7.86054	1.75079	7.13214e-06	0.000843691	evgHyS_ScswcV5_4418.g21107.t1.p1	PREDICTED: glycine receptor subunit alpha-2-like [Hydra vulgaris]	1.24e-89	LOW QUALITY PROTEIN: glycine receptor subunit alpha-3	GLRA3	glycine binding	excitatory postsynaptic potential	postsynapse
GENE.evgMSTRG.117483.14~~evgMSTRG.117483.14.p1	-4.51612	1.00603	7.15405e-06	0.000843691	evgMSTRG.117483.14.p1	PREDICTED: uncharacterized protein LOC100205133 [Hydra vulgaris]	1.36e-49	NA	NA	NA	NA	NA
GENE.evgMSTRG.40622.1~~evgMSTRG.40622.1.p1	-8.91157	1.99606	8.02213e-06	0.000939673	NA	NA	NA	NA	NA	NA	NA	NA
GENE.evgtrinLocDN36027c0g1t10~~evgtrinLocDN36027c0g1t10.p1	-8.0903	1.81802	8.58426e-06	0.000979978	NA	NA	NA	NA	NA	NA	NA	NA
GENE.evgtrinLocDN12680c1g1t4~~evgtrinLocDN12680c1g1t4.p1	-5.12676	1.15309	8.74467e-06	0.000990834	evgtrinLocDN12680c1g1t4.p1	predicted protein [Nematostella vectensis]	4.59e-14	Ligand-gated ion channel family protein	NA	voltage-gated potassium channel activity	ionotropic glutamate receptor signaling pathway	voltage-gated potassium channel complex
GENE.evgHyS_ScswcV5_366.g1356.t1~~evgHyS_ScswcV5_366.g1356.t1.p1	-3.77605	0.84975	8.84172e-06	0.000995325	evgHyS_ScswcV5_366.g1356.t1.p1	DUF4850 domain-containing protein [Pasteurella dagmatis]	1.1	NA	NA	NA	NA	NA
GENE.evgtrinLocDN6273c0g1t9~~evgtrinLocDN6273c0g1t9.p1	-6.62875	1.49726	9.54392e-06	0.0010606	evgtrinLocDN6273c0g1t9.p1	PREDICTED: uncharacterized protein PF11_0213-like [Hydra vulgaris]	5.75e-80	NA	NA	NA	NA	NA
GENE.evgtrinLocDN1310c0g1t8~~evgtrinLocDN1310c0g1t8.p1	-9.75169	2.20892	1.01153e-05	0.00111567	evgtrinLocDN1310c0g1t8.p1	hypothetical protein DRR08_10715 [Gammaproteobacteria bacterium]	2.4	NA	NA	NA	NA	NA
GENE.evgHyS_ScswcV5_1325.g4755.t1~~evgHyS_ScswcV5_1325.g4755.t1.p1	-4.79601	1.09042	1.0909e-05	0.00118943	evgHyS_ScswcV5_1325.g4755.t1.p1	ryncolin-2-like [Exaiptasia pallida]	4.12e-44	fibrinogen C domain-containing protein 1-B	NA	chitin binding	collagen fibril organization	collagen-containing extracellular matrix
GENE.evgHyS_ScswcV5_3215.g13004.t1~~evgHyS_ScswcV5_3215.g13004.t1.p1	-6.57198	1.49704	1.13367e-05	0.00122833	evgHyS_ScswcV5_3215.g13004.t1.p1	PREDICTED: gamma-aminobutyric acid receptor subunit rho-2-like [Hydra vulgaris]	1.04e-93	gamma-aminobutyric acid receptor subunit theta	NA	extracellular ligand-gated ion channel activity	ion transmembrane transport	plasma membrane
GENE.evgtrinLocDN6804c0g1t13~~evgtrinLocDN6804c0g1t13.p1	-5.53577	1.2621	1.15375e-05	0.00124233	evgtrinLocDN6804c0g1t13.p1	PREDICTED: LOW QUALITY PROTEIN: homeobox protein SMOX-4-like [Hydra vulgaris]	6.91e-24	NA	NA	NA	NA	NA
GENE.evgtrinLocDN2742c0g8t1~~evgtrinLocDN2742c0g8t1.p1	-6.39113	1.45988	1.19859e-05	0.00126699	NA	NA	NA	NA	NA	NA	NA	NA
GENE.evgMSTRG.130878.1~~evgMSTRG.130878.1.p1	-6.14397	1.41082	1.33137e-05	0.0013904	evgMSTRG.130878.1.p1	predicted protein [Nematostella vectensis]	1.62e-05	NA	NA	NA	NA	NA
GENE.evgMSTRG.66903.1~~evgMSTRG.66903.1.p1	-5.46664	1.25994	1.4325e-05	0.00146946	NA	NA	NA	NA	NA	NA	NA	NA
GENE.evgMSTRG.75167.1~~evgMSTRG.75167.1.p1	-6.86086	1.58721	1.5421e-05	0.00155429	evgMSTRG.75167.1.p1	hypothetical protein ASC65_11255 [Brevundimonas sp. Root1279]	1.4	NA	NA	NA	NA	NA
GENE.evgHyS_ScswcV5_4418.g21137.t1~~evgHyS_ScswcV5_4418.g21137.t1.p1	-6.39866	1.48702	1.68498e-05	0.00166918	evgHyS_ScswcV5_4418.g21137.t1.p1	prepropeptide [Tripedalia cystophora]	0.005	NA	NA	NA	NA	NA
GENE.evgtrinLocDN562c0g1t10~~evgtrinLocDN562c0g1t10.p1	-8.65801	2.01489	1.73108e-05	0.00170511	NA	NA	NA	NA	NA	NA	NA	NA
GENE.evgtrinLocDN5008c0g1t8~~evgtrinLocDN5008c0g1t8.p1	-3.85536	0.899307	1.81073e-05	0.00177349	evgtrinLocDN5008c0g1t8.p1	hypothetical protein RP20_CCG014570 [Aedes albopictus]	5.22e-58	Integrase core domain protein (Fragment)	NA	nucleic acid binding	DNA integration	NA
GENE.evgMSTRG.121872.2~~evgMSTRG.121872.2.p1	-5.81968	1.35834	1.83232e-05	0.00178456	evgMSTRG.121872.2.p1	PREDICTED: structure-specific endonuclease subunit slx1-like [Hydra vulgaris]	6.55e-103	Structure-specific endonuclease subunit SLX1	SLX1	5'-flap endonuclease activity	DNA recombination	Slx1-Slx4 complex
GENE.evgtrinLocDN32013c0g2t5~~evgtrinLocDN32013c0g2t5.p1	-4.73618	1.10998	1.98206e-05	0.00190895	evgtrinLocDN32013c0g2t5.p1	mAch receptor 1 [Hydra vulgaris]	7.82e-103	MAch receptor 1	NA	G protein-coupled receptor activity	G protein-coupled receptor signaling pathway	integral component of plasma membrane
GENE.evgHyS_ScswcV5_1325.g4930.t1~~evgHyS_ScswcV5_1325.g4930.t1.p1	-3.33562	0.782581	2.0231e-05	0.00192833	evgHyS_ScswcV5_1325.g4930.t1.p1	uncharacterized protein LOC110244097 isoform X2 [Exaiptasia pallida]	0	Potassium voltage-gated channel protein eag	NA	voltage-gated potassium channel activity	regulation of ion transmembrane transport	integral component of plasma membrane
GENE.evgMSTRG.107353.1~~evgMSTRG.107353.1.p1	-3.32507	0.786991	2.38903e-05	0.00223871	evgMSTRG.107353.1.p1	PREDICTED: mucin-2-like [Hydra vulgaris]	1.3e-30	NA	NA	NA	NA	NA
GENE.evgHyS_ScswcV5_4378.g20482.t1~~evgHyS_ScswcV5_4378.g20482.t1.p1	-4.54722	1.07929	2.51811e-05	0.00234426	evgHyS_ScswcV5_4378.g20482.t1.p1	Innexin 4, partial [Hydra vulgaris]	1.54e-47	NA	NA	NA	NA	NA
GENE.evgMSTRG.126143.23~~evgMSTRG.126143.23.p1	-4.3992	1.04469	2.54223e-05	0.00234426	evgMSTRG.126143.23.p1	minicollagen 3-4a [Clytia hemisphaerica]	3.42e-05	Cuticle collagen lon-3	NA	structural constituent of cuticle	epithelial cell proliferation	collagen trimer
GENE.evgMSTRG.97611.9~~evgMSTRG.97611.9.p2	-3.59644	0.856306	2.6698e-05	0.00241602	evgMSTRG.97611.9.p2	conserved exported protein of unknown function [Candidatus Nitrosopumilus piranensis]	3.3	NA	NA	NA	NA	NA
GENE.evgMSTRG.40783.1~~evgMSTRG.40783.1.p1	-8.10886	1.93094	2.67579e-05	0.00241602	evgMSTRG.40783.1.p1	predicted protein [Nematostella vectensis]	1.68e-26	NA	NA	NA	NA	NA
GENE.evgHyS_ScswcV5_3781.g16313.t1~~evgHyS_ScswcV5_3781.g16313.t1.p1	-7.89864	1.88253	2.71968e-05	0.00244292	evgHyS_ScswcV5_3781.g16313.t1.p1	PREDICTED: carbohydrate sulfotransferase 1-like [Hydra vulgaris]	0	Carbohydrate sulfotransferase 1	NA	sulfotransferase activity	N-acetylglucosamine metabolic process	Golgi membrane
GENE.evgMSTRG.108730.1~~evgMSTRG.108730.1.p1	-8.62694	2.05731	2.7491e-05	0.00245662	evgMSTRG.108730.1.p1	beta-1 adrenergic receptor-like [Pocillopora damicornis]	0.000106	NA	NA	NA	NA	NA
GENE.evgMSTRG.79652.2~~evgMSTRG.79652.2.p3	-7.13368	1.70631	2.9053e-05	0.0025697	NA	NA	NA	NA	NA	NA	NA	NA
GENE.evgHyS_ScswcV5_664.g2857.t1~~evgHyS_ScswcV5_664.g2857.t1.p1	-4.23993	1.01573	2.9896e-05	0.00262363	evgHyS_ScswcV5_664.g2857.t1.p1	hypothetical protein BRAFLDRAFT_128400 [Branchiostoma floridae]	1.32e-56	Rac gtpase	NA	GTPase activity	small GTPase mediated signal transduction	cell projection
GENE.evgHyS_ScswcV5_4270.g19947.t1~~evgHyS_ScswcV5_4270.g19947.t1.p1	-8.47046	2.02947	2.99653e-05	0.00262363	evgHyS_ScswcV5_4270.g19947.t1.p1	boule-like protein 2, partial [Hydra vulgaris]	1.67e-26	DAZ-associated protein	NA	RNA binding	negative regulation of response to water deprivation	chloroplast envelope
GENE.evgtrinLocDN9752c0g1t9~~evgtrinLocDN9752c0g1t9.p1	-4.67638	1.12185	3.06689e-05	0.00265838	evgtrinLocDN9752c0g1t9.p1	hypothetical protein B6I25_07565 [Planctomycetales bacterium 4572_13]	7.73e-17	NA	NA	NA	NA	NA
GENE.evgtrinLocDN113187c0g1t18~~evgtrinLocDN113187c0g1t18.p1	-7.19668	1.72997	3.1824e-05	0.00271774	evgtrinLocDN113187c0g1t18.p1	hypothetical protein OESDEN_03796 [Oesophagostomum dentatum]	1.1	NA	NA	NA	NA	NA
GENE.evgMSTRG.46347.1~~evgMSTRG.46347.1.p1	-7.35481	1.7693	3.22575e-05	0.00274126	evgMSTRG.46347.1.p1	PREDICTED: uncharacterized protein LOC105843510 [Hydra vulgaris]	2	NA	NA	NA	NA	NA
GENE.evgtrinLocDN26357c0g1t4~~evgtrinLocDN26357c0g1t4.p1	-5.50502	1.3263	3.3153e-05	0.00279	evgtrinLocDN26357c0g1t4.p1	PREDICTED: extracellular calcium-sensing receptor-like [Hydra vulgaris]	2.73e-74	Glutamate receptor, metabotropic 3	NA	G protein-coupled receptor activity	G protein-coupled receptor signaling pathway	plasma membrane
GENE.evgHyS_ScswcV5_3209.g12932.t1~~evgHyS_ScswcV5_3209.g12932.t1.p1	-5.175	1.2498	3.46298e-05	0.00287245	evgHyS_ScswcV5_3209.g12932.t1.p1	PREDICTED: protein MMS22-like isoform X1 [Hydra vulgaris]	4.06e-128	NA	NA	NA	NA	NA
GENE.evgMSTRG.72481.2~~evgMSTRG.72481.2.p1	-6.56284	1.58628	3.51499e-05	0.00290171	evgMSTRG.72481.2.p1	PREDICTED: dimethylaniline monooxygenase [N-oxide-forming] 2-like [Hydra vulgaris]	0	Flavin-containing monooxygenase	NA	N,N-dimethylaniline monooxygenase activity	oxidation-reduction process	endoplasmic reticulum membrane
GENE.evgHyS_ScswcV5_1630.g5459.t1~~evgHyS_ScswcV5_1630.g5459.t1.p1	-5.1839	1.2534	3.53598e-05	0.00290362	evgHyS_ScswcV5_1630.g5459.t1.p1	hypothetical protein pdam_00021282, partial [Pocillopora damicornis]	6.77e-124	NA	NA	NA	NA	NA
GENE.evgMSTRG.72907.10~~evgMSTRG.72907.10.p1	-4.61986	1.11728	3.5508e-05	0.00290362	NA	NA	NA	NA	NA	NA	NA	NA
GENE.evgMSTRG.119887.1~~evgMSTRG.119887.1.p1	-4.01905	0.975763	3.80713e-05	0.00305557	evgMSTRG.119887.1.p1	PREDICTED: E3 ubiquitin-protein ligase SH3RF1-like isoform X2 [Hydra vulgaris]	2.32e-109	SH3 domain-containing RING finger protein 3	NA	metal ion binding	regulation of JNK cascade	cytosol
GENE.evgtrinLocDN1838c0g2t2~~evgtrinLocDN1838c0g2t2.p1	-8.38619	2.04209	4.01408e-05	0.00320682	NA	NA	NA	NA	NA	NA	NA	NA
GENE.evgHyS_ScswcV5_3493.g15064.t1~~evgHyS_ScswcV5_3493.g15064.t1.p1	-5.55838	1.35572	4.13252e-05	0.0032713	evgHyS_ScswcV5_3493.g15064.t1.p1	PREDICTED: probable glutamate receptor [Hydra vulgaris]	3.73e-35	NA	NA	NA	NA	NA
GENE.evgHyS_ScswcV5_2457.g9556.t1~~evgHyS_ScswcV5_2457.g9556.t1.p1	-6.41709	1.56861	4.29624e-05	0.00337824	evgHyS_ScswcV5_2457.g9556.t1.p1	PREDICTED: protein DVR-1 homolog [Hydra vulgaris]	2.61e-61	Transforming growth factor 4 protein (Fragment)	NA	growth factor activity	regulation of signaling receptor activity	extracellular region
GENE.evgtrinLocDN28443c0g1t1~~evgtrinLocDN28443c0g1t1.p1	-6.38573	1.56116	4.30659e-05	0.00337824	evgtrinLocDN28443c0g1t1.p1	PREDICTED: alpha-1A adrenergic receptor-like [Hydra vulgaris]	1.75e-07	NA	NA	NA	NA	NA
GENE.evgtrinLocDN17766c1g2t4~~evgtrinLocDN17766c1g2t4.p1	-3.06973	0.755016	4.78718e-05	0.00372155	evgtrinLocDN17766c1g2t4.p1	degenerin mec-4-like isoform X1 [Orbicella faveolata]	1.55e-54	Amiloride-sensitive sodium channel subunit alpha	NA	sodium channel activity	sodium ion transmembrane transport	integral component of membrane
GENE.evgHyS_ScswcV5_1733.g5615.t1~~evgHyS_ScswcV5_1733.g5615.t1.p1	-6.64264	1.64188	5.21536e-05	0.00398297	evgHyS_ScswcV5_1733.g5615.t1.p1	PREDICTED: neurogenic locus notch homolog protein 2-like [Hydra vulgaris]	0	Fibropellin-1	NA	calcium ion binding	Notch signaling pathway	integral component of membrane
GENE.evgHyS_ScswcV5_2548.g10136.t1~~evgHyS_ScswcV5_2548.g10136.t1.p1	-5.77535	1.43036	5.39813e-05	0.00410447	evgHyS_ScswcV5_2548.g10136.t1.p1	PREDICTED: arrestin domain-containing protein 3-like [Hydra vulgaris]	4.71e-36	NA	NA	NA	NA	NA
GENE.evgHyS_ScswcV5_2556.g10465.t1~~evgHyS_ScswcV5_2556.g10465.t1.p1	-6.29575	1.56095	5.50012e-05	0.00414316	evgHyS_ScswcV5_2556.g10465.t1.p1	Alkylated DNA repair protein alkB-8-like protein [Morus notabilis]	1.16e-39	S-adenosyl-L-methionine-dependent methyltransferase	NA	tRNA (uracil) methyltransferase activity	tRNA wobble uridine modification	nucleus
GENE.evgHyS_ScswcV5_4378.g20625.t1~~evgHyS_ScswcV5_4378.g20625.t1.p1	-8.54313	2.11856	5.51806e-05	0.00414316	evgHyS_ScswcV5_4378.g20625.t1.p1	PREDICTED: zinc metalloproteinase nas-13-like [Hydra vulgaris]	5.57e-97	Zinc metalloproteinase	NA	metalloendopeptidase activity	proteolysis	extracellular region
GENE.evgHyS_ScswcV5_66.g385.t1~~evgHyS_ScswcV5_66.g385.t1.p1	-5.10648	1.2719	5.94864e-05	0.00439217	evgHyS_ScswcV5_66.g385.t1.p1	PREDICTED: uncharacterized protein LOC100202039 [Hydra vulgaris]	5.8e-23	NA	NA	NA	NA	NA
GENE.evgHyS_ScswcV5_1748.g6351.t1~~evgHyS_ScswcV5_1748.g6351.t1.p1	-7.14164	1.7789	5.95385e-05	0.00439217	evgHyS_ScswcV5_1748.g6351.t1.p1	hypothetical protein RF11_07293 [Thelohanellus kitauei]	0.000478	NA	NA	NA	NA	NA
GENE.evgHyS_ScswcV5_457.g1666.t1~~evgHyS_ScswcV5_457.g1666.t1.p1	-8.3513	2.08231	6.05679e-05	0.00440054	evgHyS_ScswcV5_457.g1666.t1.p1	PREDICTED: galactoside 3(4)-L-fucosyltransferase-like [Hydra vulgaris]	5.5e-168	NA	NA	NA	NA	NA
GENE.evgHyS_ScswcV5_4270.g20208.t1~~evgHyS_ScswcV5_4270.g20208.t1.p1	-5.36685	1.3383	6.06673e-05	0.00440054	evgHyS_ScswcV5_4270.g20208.t1.p1	actin related protein 8-like protein [Hydractinia symbiolongicarpus]	0	Actin-related protein 8	ACTR8	ATP binding	chromatin remodeling	Ino80 complex
GENE.evgHyS_ScswcV5_2402.g9002.t1~~evgHyS_ScswcV5_2402.g9002.t1.p1	-4.65969	1.16254	6.11794e-05	0.00441919	evgHyS_ScswcV5_2402.g9002.t1.p1	PREDICTED: kinectin-like [Hydra vulgaris]	5.24e-116	NA	NA	NA	NA	NA
GENE.evgHyS_ScswcV5_3203.g12715.t1~~evgHyS_ScswcV5_3203.g12715.t1.p1	-8.54663	2.13427	6.21547e-05	0.00445307	evgHyS_ScswcV5_3203.g12715.t1.p1	blastula protease 10-like isoform X1 [Orbicella faveolata]	2.58e-45	Metalloendopeptidase	NA	metalloendopeptidase activity	proteolysis	membrane
GENE.evgtrinLocDN9147c1g1t9~~evgtrinLocDN9147c1g1t9.p1	-7.37823	1.84258	6.2204e-05	0.00445307	evgtrinLocDN9147c1g1t9.p1	uncharacterized protein LOC110251108 [Exaiptasia pallida]	3.7e-47	NA	NA	NA	NA	NA
GENE.evgHyS_ScswcV5_1750.g6561.t1~~evgHyS_ScswcV5_1750.g6561.t1.p1	-6.21417	1.55296	6.29423e-05	0.004472	evgHyS_ScswcV5_1750.g6561.t1.p1	PREDICTED: gamma-glutamyltranspeptidase 1-like [Hydra vulgaris]	0	Glutathione hydrolase 1 proenzyme	GGT1	glutathione hydrolase activity	glutathione catabolic process	fungal-type vacuole
GENE.evgMSTRG.6863.1~~evgMSTRG.6863.1.p1	-5.94014	1.48556	6.37198e-05	0.00450876	evgMSTRG.6863.1.p1	PREDICTED: uncharacterized protein LOC105846192 [Hydra vulgaris]	1e-21	NA	NA	NA	NA	NA
GENE.evgtrinLocDN55184c0g1t2~~evgtrinLocDN55184c0g1t2.p2	-8.65017	2.16984	6.70395e-05	0.00468628	evgtrinLocDN55184c0g1t2.p2	pleckstrin homology-like domain family B member 1 isoform X1 [Ceratitis capitata]	5.7	NA	NA	NA	NA	NA
GENE.evgMSTRG.107034.1~~evgMSTRG.107034.1.p1	-4.82573	1.21094	6.7447e-05	0.00469583	evgMSTRG.107034.1.p1	trace amine-associated receptor 13c-like [Seriola dumerili]	0.055	NA	NA	NA	NA	NA
GENE.evgHyS_ScswcV5_807.g3579.t1~~evgHyS_ScswcV5_807.g3579.t1.p1	-4.1979	1.05479	6.89594e-05	0.004738	evgHyS_ScswcV5_807.g3579.t1.p1	PREDICTED: endothelin-converting enzyme 1-like [Hydra vulgaris]	0	phosphate-regulating neutral endopeptidase	NA	metalloendopeptidase activity	proteolysis	integral component of membrane
GENE.evgtrinLocDN30898c0g1t10~~evgtrinLocDN30898c0g1t10.p1	-2.65161	0.666287	6.90066e-05	0.004738	evgtrinLocDN30898c0g1t10.p1	PREDICTED: uncharacterized protein LOC100214616 [Hydra vulgaris]	6.4	NA	NA	NA	NA	NA
GENE.evgMSTRG.79541.1~~evgMSTRG.79541.1.p1	-6.83727	1.71912	6.97334e-05	0.00474185	evgMSTRG.79541.1.p1	aminotransferase class I/II-fold pyridoxal phosphate-dependent enzyme [Nocardia fluminea]	1.2	NA	NA	NA	NA	NA
GENE.evgtrinLocDN1009c0g1t11~~evgtrinLocDN1009c0g1t11.p1	-3.19258	0.805452	7.37918e-05	0.00495835	evgtrinLocDN1009c0g1t11.p1	Sushi, von Willebrand factor type A, EGF and pentraxin domain-containing protein 1 [Exaiptasia pallida]	2.26e-07	NA	NA	NA	NA	NA
GENE.evgMSTRG.97606.1~~evgMSTRG.97606.1.p1	-8.28208	2.09326	7.6044e-05	0.00507038	NA	NA	NA	NA	NA	NA	NA	NA
GENE.evgMSTRG.63035.1~~evgMSTRG.63035.1.p1	-5.84047	1.48729	8.60392e-05	0.00567139	evgMSTRG.63035.1.p1	hypothetical protein AC249_AIPGENE6090 [Exaiptasia pallida]	0.067	NA	NA	NA	NA	NA
GENE.evgHyS_ScswcV5_216.g939.t1~~evgHyS_ScswcV5_216.g939.t1.p1	-5.65614	1.44224	8.78962e-05	0.00575007	evgHyS_ScswcV5_216.g939.t1.p1	PREDICTED: putative ammonium transporter 1, partial [Hydra vulgaris]	2.99e-90	Ammonium transporter	NA	ammonium transmembrane transporter activity	ammonium transmembrane transport	integral component of plasma membrane
GENE.evgtrinLocDN26783c0g1t7~~evgtrinLocDN26783c0g1t7.p1	-2.80392	0.715865	8.97223e-05	0.00584747	evgtrinLocDN26783c0g1t7.p1	PREDICTED: GTP-binding protein 1-like [Hydra vulgaris]	0	GTP-binding protein 1	GTPBP1	GTPase activity	translational elongation	cytoplasmic exosome (RNase complex)
GENE.evgHyS_ScswcV5_3309.g13758.t1~~evgHyS_ScswcV5_3309.g13758.t1.p1	-4.51857	1.1553	9.18466e-05	0.00596349	evgHyS_ScswcV5_3309.g13758.t1.p1	PREDICTED: PC3-like endoprotease variant B [Hydra vulgaris]	0	Proprotein convertase subtilisin/kexin type 1	PCSK6	serine-type endopeptidase activity	proteolysis	trans-Golgi network
GENE.evgHyS_ScswcV5_1342.g5110.t1~~evgHyS_ScswcV5_1342.g5110.t1.p1	-3.21426	0.822144	9.2447e-05	0.00598008	evgHyS_ScswcV5_1342.g5110.t1.p1	PREDICTED: uncharacterized protein LOC101241534 [Hydra vulgaris]	2.68e-111	NA	NA	NA	NA	NA
GENE.evgtrinLocDN33255c0g1t2~~evgtrinLocDN33255c0g1t2.p1	-6.85834	1.75476	9.29058e-05	0.00598742	evgtrinLocDN33255c0g1t2.p1	PREDICTED: uncharacterized protein LOC105845533 [Hydra vulgaris]	1.62e-30	Amino acid ABC transporter substrate-binding protein	NA	potassium channel activity	potassium ion transport	voltage-gated potassium channel complex
GENE.evgtrinLocDN67501c0g2t2~~evgtrinLocDN67501c0g2t2.p1	-6.91347	1.78211	0.000104724	0.00666565	evgtrinLocDN67501c0g2t2.p1	predicted protein [Nematostella vectensis]	3.81e-05	NA	NA	NA	NA	NA
GENE.evgHyS_ScswcV5_807.g3645.t1~~evgHyS_ScswcV5_807.g3645.t1.p1	-2.65497	0.68448	0.000104968	0.00666565	evgHyS_ScswcV5_807.g3645.t1.p1	creatine kinase, flagellar-like isoform X1 [Ciona intestinalis]	0	NA	NA	NA	NA	NA
GENE.evgMSTRG.63097.1~~evgMSTRG.63097.1.p1	-9.41529	2.43168	0.00010798	0.00680703	evgMSTRG.63097.1.p1	PREDICTED: N-acetylglucosaminyl-phosphatidylinositol de-N-acetylase isoform X1 [Apteryx australis mantelli]	9.3	NA	NA	NA	NA	NA
GENE.evgMSTRG.112176.1~~evgMSTRG.112176.1.p2	-7.49731	1.94189	0.000113002	0.00709785	evgMSTRG.112176.1.p2	hypothetical protein SAMN04488694_13213 [Haloterrigena hispanica]	0.14	NA	NA	NA	NA	NA
GENE.evgHyS_ScswcV5_4367.g20410.t1~~evgHyS_ScswcV5_4367.g20410.t1.p1	-3.01299	0.783334	0.000119882	0.00747583	evgHyS_ScswcV5_4367.g20410.t1.p1	PREDICTED: uncharacterized protein LOC100215884 [Hydra vulgaris]	1.66e-34	NA	NA	NA	NA	NA
GENE.evgMSTRG.22796.1~~evgMSTRG.22796.1.p2	-6.55783	1.70558	0.000120593	0.00748832	evgMSTRG.22796.1.p2	hypothetical protein A2Y80_00655 [Deltaproteobacteria bacterium RBG_13_58_19]	1.7	NA	NA	NA	NA	NA
GENE.evgHyS_ScswcV5_1783.g7274.t1~~evgHyS_ScswcV5_1783.g7274.t1.p1	-4.09256	1.06461	0.000120947	0.00748832	evgHyS_ScswcV5_1783.g7274.t1.p1	PREDICTED: protein RFT1 homolog [Hydra vulgaris]	3.34e-60	NA	NA	NA	NA	NA
GENE.evgtrinLocDN14159c0g1t7~~evgtrinLocDN14159c0g1t7.p1	-5.06865	1.32445	0.000129716	0.00786123	evgtrinLocDN14159c0g1t7.p1	synaptotagmin-1-like [Orbicella faveolata]	5.32e-76	Synaptotagmin XII	SYT12	calcium-dependent phospholipid binding	long-term synaptic potentiation	exocytic vesicle
GENE.evgMSTRG.59768.1~~evgMSTRG.59768.1.p1	-6.21702	1.62486	0.000130144	0.00786123	evgMSTRG.59768.1.p1	2,4-dihydroxyhept-2-ene-1,7-dioic acid aldolase [Desulfobacteraceae bacterium]	0.16	NA	NA	NA	NA	NA
GENE.evgMSTRG.84786.1~~evgMSTRG.84786.1.p1	-4.46196	1.16997	0.000136881	0.00821096	NA	NA	NA	NA	NA	NA	NA	NA
GENE.evgtrinLocDN3089c0g2t8~~evgtrinLocDN3089c0g2t8.p1	-5.86014	1.53867	0.000139767	0.00832993	evgtrinLocDN3089c0g2t8.p1	uncharacterized protein LOC111085920 [Limulus polyphemus]	6.04e-09	NA	NA	NA	NA	NA
GENE.evgMSTRG.51117.1~~evgMSTRG.51117.1.p1	-7.54535	1.98565	0.000144729	0.0085632	evgMSTRG.51117.1.p1	PREDICTED: zinc metalloproteinase nas-15-like [Hydra vulgaris]	1.29e-98	Zinc metalloproteinase	NA	metalloendopeptidase activity	proteolysis	extracellular region
GENE.evgtrinLocDN35020c0g1t17~~evgtrinLocDN35020c0g1t17.p1	-4.45968	1.17427	0.000145959	0.00860659	evgtrinLocDN35020c0g1t17.p1	PREDICTED: LOW QUALITY PROTEIN: tigger transposable element-derived protein 4-like, partial [Acropora digitifera]	0.34	NA	NA	NA	NA	NA
GENE.evgtrinLocDN1817c0g1t7~~evgtrinLocDN1817c0g1t7.p1	-4.31876	1.14009	0.000151819	0.00892182	evgtrinLocDN1817c0g1t7.p1	uncharacterized protein LOC111330387 [Stylophora pistillata]	8.21e-34	Provirus ancestral Pol-like protein (Fragment)	NA	nucleic acid binding	DNA integration	NA
GENE.evgMSTRG.119678.1~~evgMSTRG.119678.1.p3	-3.68023	0.971959	0.000152845	0.00895179	evgMSTRG.119678.1.p3	uncharacterized protein LOC110231226, partial [Exaiptasia pallida]	2.69e-22	NA	NA	NA	NA	NA
GENE.evgtrinLocDN20038c5g1t1~~evgtrinLocDN20038c5g1t1.p1	-8.29425	2.19141	0.00015377	0.00897559	evgtrinLocDN20038c5g1t1.p1	glyoxylase-like metal-dependent hydrolase (beta-lactamase superfamily II) [Rhizobium sullae]	1	NA	NA	NA	NA	NA
GENE.evgHyS_ScswcV5_26.g216.t1~~evgHyS_ScswcV5_26.g216.t1.p1	-5.55718	1.46865	0.000154416	0.00898307	evgHyS_ScswcV5_26.g216.t1.p1	PREDICTED: ATP-sensitive inward rectifier potassium channel 12-like [Pundamilia nyererei]	9.2e-99	Inwardly-rectifying potassium channel	KCNJ12	inward rectifier potassium channel activity	regulation of ion transmembrane transport	integral component of membrane
GENE.evgMSTRG.57281.1~~evgMSTRG.57281.1.p1	-7.62078	2.01818	0.00015932	0.00923739	NA	NA	NA	NA	NA	NA	NA	NA
GENE.evgMSTRG.17598.1~~evgMSTRG.17598.1.p1	-8.93979	2.37077	0.000162701	0.00940196	evgMSTRG.17598.1.p1	uncharacterized protein LOC111691962 [Anoplophora glabripennis]	0.001	NA	NA	NA	NA	NA
GENE.evgHyS_ScswcV5_4378.g20923.t1~~evgHyS_ScswcV5_4378.g20923.t1.p1	-7.02571	1.8653	0.000165531	0.00950213	evgHyS_ScswcV5_4378.g20923.t1.p1	PREDICTED: replication protein A 32 kDa subunit-like [Hydra vulgaris]	1.21e-114	Replication protein A subunit	RPA2	G-rich strand telomeric DNA binding	DNA replication	DNA replication factor A complex
GENE.evgHyS_ScswcV5_1219.g4454.t1~~evgHyS_ScswcV5_1219.g4454.t1.p1	-4.26033	1.13228	0.000168159	0.00962111	evgHyS_ScswcV5_1219.g4454.t1.p1	zinc finger protein 16-like [Hydra vulgaris]	2.77e-141	Zinc finger protein 184	NA	nucleic acid binding	regulation of transcription, DNA-templated	nucleus
GENE.evgHyS_ScswcV5_2556.g10356.t1~~evgHyS_ScswcV5_2556.g10356.t1.p1	-3.1854	0.847962	0.000172281	0.00982454	evgHyS_ScswcV5_2556.g10356.t1.p1	PREDICTED: nucleoporin NUP188 homolog [Hydra vulgaris]	0	NA	NA	NA	NA	NA
GENE.evgHyS_ScswcV5_4037.g18151.t1~~evgHyS_ScswcV5_4037.g18151.t1.p1	-9.3924	2.50195	0.000174015	0.0098586	NA	NA	NA	NA	NA	NA	NA	NA
GENE.evgHyS_ScswcV5_290.g1056.t1~~evgHyS_ScswcV5_290.g1056.t1.p1	-3.7669	1.00433	0.00017638	0.00993231	evgHyS_ScswcV5_290.g1056.t1.p1	PREDICTED: gamma-aminobutyric acid receptor subunit rho-2-like [Hydra vulgaris]	2.15e-94	gamma-aminobutyric acid receptor subunit theta	NA	extracellular ligand-gated ion channel activity	ion transmembrane transport	plasma membrane
GENE.evgtrinLocDN76562c0g1t1~~evgtrinLocDN76562c0g1t1.p1	-5.15388	1.37567	0.000179356	0.0100625	evgtrinLocDN76562c0g1t1.p1	PREDICTED: uncharacterized protein LOC106811605 [Priapulus caudatus]	6.61e-18	NA	NA	NA	NA	NA
GENE.evgHyS_ScswcV5_4265.g19490.t1~~evgHyS_ScswcV5_4265.g19490.t1.p1	-3.21837	0.860152	0.00018283	0.0102243	evgHyS_ScswcV5_4265.g19490.t1.p1	PREDICTED: J domain-containing protein DDB_G0295729-like isoform X2 [Hydra vulgaris]	2.34e-13	NA	NA	NA	NA	NA
GENE.evgtrinLocDN37984c1g1t2~~evgtrinLocDN37984c1g1t2.p1	-7.01285	1.87606	0.000185434	0.010333	evgtrinLocDN37984c1g1t2.p1	PREDICTED: uncharacterized protein LOC105847536, partial [Hydra vulgaris]	0.026	NA	NA	NA	NA	NA
GENE.evgtrinLocDN100134c0g1t2~~evgtrinLocDN100134c0g1t2.p1	-8.15093	2.19621	0.000206154	0.0113097	evgtrinLocDN100134c0g1t2.p1	PREDICTED: uncharacterized protein LOC107344729 [Acropora digitifera]	1.1e-15	NA	NA	NA	NA	NA
GENE.evgHyS_ScswcV5_936.g3811.t1~~evgHyS_ScswcV5_936.g3811.t1.p1	-4.40804	1.18819	0.000207361	0.0113247	evgHyS_ScswcV5_936.g3811.t1.p1	extracellular calcium-sensing receptor-like [Pocillopora damicornis]	1.1e-37	NA	NA	NA	NA	NA
GENE.evgtrinLocDN3602c0g1t12~~evgtrinLocDN3602c0g1t12.p1	-6.83449	1.84247	0.000207733	0.0113247	evgtrinLocDN3602c0g1t12.p1	predicted protein [Nematostella vectensis]	1.45e-06	NA	NA	NA	NA	NA
GENE.evgtrinLocDN5800c10g1t2~~evgtrinLocDN5800c10g1t2.p1	-8.20559	2.2132	0.00020926	0.0113722	NA	NA	NA	NA	NA	NA	NA	NA
GENE.evgtrinLocDN19374c0g1t6~~evgtrinLocDN19374c0g1t6.p2	-3.67047	0.991548	0.000214115	0.0115635	NA	NA	NA	NA	NA	NA	NA	NA
GENE.evgHyS_ScswcV5_66.g596.t1~~evgHyS_ScswcV5_66.g596.t1.p1	-3.16476	0.855193	0.000215054	0.0115782	evgHyS_ScswcV5_66.g596.t1.p1	PREDICTED: uncharacterized protein LOC100212597 [Hydra vulgaris]	0	NA	NA	NA	NA	NA
GENE.evgtrinLocDN24596c0g1t1~~evgtrinLocDN24596c0g1t1.p1	-8.18802	2.21431	0.000217502	0.0116737	evgtrinLocDN24596c0g1t1.p1	uncharacterized protein LOC105204222 [Solenopsis invicta]	2.38e-11	NA	NA	NA	NA	NA
GENE.evgtrinLocDN20910c0g1t11~~evgtrinLocDN20910c0g1t11.p1	-7.36932	1.99566	0.00022191	0.0118736	evgtrinLocDN20910c0g1t11.p1	hypothetical protein ROHU_022151 [Labeo rohita]	2.13e-11	NA	NA	NA	NA	NA
GENE.evgtrinLocDN10361c0g1t23~~evgtrinLocDN10361c0g1t23.p1	-5.74335	1.55926	0.000230162	0.0122772	evgtrinLocDN10361c0g1t23.p1	PREDICTED: uncharacterized protein LOC105845339 [Hydra vulgaris]	1.54e-33	39S ribosomal protein L4,mitochondrial	RPLD	structural constituent of ribosome	translation	ribosome
GENE.evgMSTRG.135691.1~~evgMSTRG.135691.1.p1	-5.10261	1.38566	0.000231006	0.0122844	evgMSTRG.135691.1.p1	cnidarian egg lectin isoform a [Hydractinia echinata]	0	NA	NA	NA	NA	NA
GENE.evgtrinLocDN33181c0g1t17~~evgtrinLocDN33181c0g1t17.p1	-8.48971	2.30769	0.000234259	0.0123815	evgtrinLocDN33181c0g1t17.p1	elongation factor Tu [Desulfomicrobium baculatum]	0.85	NA	NA	NA	NA	NA
GENE.evgHyS_ScswcV5_2333.g8554.t1~~evgHyS_ScswcV5_2333.g8554.t1.p1	-6.4846	1.76649	0.000241708	0.0126977	evgHyS_ScswcV5_2333.g8554.t1.p1	PREDICTED: antistasin-like [Biomphalaria glabrata]	3.96e-46	NA	NA	NA	NA	NA
GENE.evgtrinLocDN25508c1g1t1~~evgtrinLocDN25508c1g1t1.p1	-3.58987	0.97818	0.000242603	0.0127062	evgtrinLocDN25508c1g1t1.p1	hypothetical protein C7M84_004917 [Penaeus vannamei]	9.3e-25	NA	NA	NA	NA	NA
GENE.evgHyS_ScswcV5_3574.g15470.t1~~evgHyS_ScswcV5_3574.g15470.t1.p1	-5.71593	1.56485	0.000259509	0.0133894	evgHyS_ScswcV5_3574.g15470.t1.p1	PREDICTED: sodium- and chloride-dependent GABA transporter 1-like [Hydra vulgaris]	0	Sodium- and chloride-dependent glycine transporter 2	NA	neurotransmitter:sodium symporter activity	neurotransmitter transport	integral component of membrane
GENE.evgtrinLocDN7876c0g1t11~~evgtrinLocDN7876c0g1t11.p1	-4.82173	1.32165	0.00026401	0.0135812	NA	NA	NA	NA	NA	NA	NA	NA
GENE.evgMSTRG.16304.1~~evgMSTRG.16304.1.p1	-8.98916	2.47705	0.000284542	0.0144658	evgMSTRG.16304.1.p1	predicted protein [Nematostella vectensis]	6.31e-27	NA	NA	NA	NA	NA
GENE.evgMSTRG.18866.1~~evgMSTRG.18866.1.p1	-6.54561	1.80665	0.00029113	0.0147144	evgMSTRG.18866.1.p1	hypothetical protein AC249_AIPGENE3338, partial [Exaiptasia pallida]	1.17e-17	NA	NA	NA	NA	NA
GENE.evgtrinLocDN8829c0g1t6~~evgtrinLocDN8829c0g1t6.p1	-8.24776	2.28043	0.000298317	0.0149902	evgtrinLocDN8829c0g1t6.p1	PREDICTED: uncharacterized protein LOC105556022 [Vollenhovia emeryi]	1.42e-45	Probable DNA polymerase: PROVISIONAL	NA	NA	NA	NA
GENE.evgHyS_ScswcV5_4270.g19589.t1~~evgHyS_ScswcV5_4270.g19589.t1.p1	-6.80904	1.88562	0.000304982	0.0152368	evgHyS_ScswcV5_4270.g19589.t1.p1	PREDICTED: uncharacterized protein LOC100215981 [Hydra vulgaris]	5.06e-23	NA	NA	NA	NA	NA
GENE.evgHyS_ScswcV5_2604.g10811.t1~~evgHyS_ScswcV5_2604.g10811.t1.p1	-3.58525	0.993794	0.000308992	0.0153048	evgHyS_ScswcV5_2604.g10811.t1.p1	chitinase 1 precursor [Hydractinia echinata]	0	Acidic mammalian chitinase	NA	chitin binding	chitin metabolic process	extracellular region
GENE.evgMSTRG.14508.1~~evgMSTRG.14508.1.p1	-4.31876	1.19764	0.00031089	0.015355	evgMSTRG.14508.1.p1	hypothetical protein DMN91_009384, partial [Ooceraea biroi]	3.13e-50	Zinc finger protein 771	NA	DNA-directed DNA polymerase activity	DNA biosynthetic process	NA
GENE.evgtrinLocDN22179c0g1t2~~evgtrinLocDN22179c0g1t2.p1	-7.44267	2.06489	0.000312892	0.0153945	evgtrinLocDN22179c0g1t2.p1	PREDICTED: zinc finger HIT domain-containing protein 1-like [Hydra vulgaris]	3.32e-80	Zinc finger HIT domain-containing protein 1	NA	histone deacetylase binding	histone exchange	Swr1 complex
GENE.evgtrinLocDN11408c0g1t8~~evgtrinLocDN11408c0g1t8.p1	-3.54728	0.984287	0.000313467	0.0153945	evgtrinLocDN11408c0g1t8.p1	hypothetical protein DJ031_00320, partial [bacterium endosymbiont of Escarpia laminata]	5.08e-75	NA	NA	NA	NA	NA
GENE.evgMSTRG.90214.1~~evgMSTRG.90214.1.p1	-8.20304	2.27855	0.000318071	0.0155765	evgMSTRG.90214.1.p1	hypothetical protein AWC38_SpisGene2024 [Stylophora pistillata]	0.38	NA	NA	NA	NA	NA
GENE.evgtrinLocDN1353c2g1t13~~evgtrinLocDN1353c2g1t13.p1	-4.92317	1.3707	0.000328514	0.0160289	evgtrinLocDN1353c2g1t13.p1	PREDICTED: uncharacterized protein LOC107339685 [Acropora digitifera]	7.61e-37	NA	NA	NA	NA	NA
GENE.evgHyS_ScswcV5_2556.g10593.t1~~evgHyS_ScswcV5_2556.g10593.t1.p1	-4.31996	1.20293	0.000329158	0.0160289	evgHyS_ScswcV5_2556.g10593.t1.p1	PREDICTED: neuronal acetylcholine receptor subunit alpha-6-like [Hydra vulgaris]	4.81e-150	acetylcholine receptor subunit alpha	NA	acetylcholine-gated cation-selective channel activity	excitatory postsynaptic potential	postsynaptic membrane
GENE.evgHyS_ScswcV5_1734.g5908.t1~~evgHyS_ScswcV5_1734.g5908.t1.p1	-6.50306	1.81524	0.000340355	0.0164356	evgHyS_ScswcV5_1734.g5908.t1.p1	dickkopf-3 related protein precursor [Hydra vulgaris]	4.94e-116	Dickkopf protein 3	DKK3	NA	NA	NA
GENE.evgMSTRG.51955.1~~evgMSTRG.51955.1.p1	-3.15801	0.882763	0.000347006	0.0167103	evgMSTRG.51955.1.p1	PREDICTED: dnaJ homolog subfamily C member 16-like [Hydra vulgaris]	0	Putative molecular chaperone dnaj superfamily	DNAJC16	heat shock protein binding	cell redox homeostasis	cell
GENE.evgMSTRG.31352.1~~evgMSTRG.31352.1.p1	-4.98307	1.39767	0.000363461	0.017406	evgMSTRG.31352.1.p1	hypothetical protein AC249_AIPGENE21915, partial [Exaiptasia pallida]	0.006	NA	NA	NA	NA	NA
GENE.evgHyS_ScswcV5_3493.g15119.t1~~evgHyS_ScswcV5_3493.g15119.t1.p1	-3.47065	0.97766	0.000385289	0.0184005	evgHyS_ScswcV5_3493.g15119.t1.p1	atrial natriuretic peptide receptor 1-like [Stylophora pistillata]	0	Olfactory guanylyl cyclase GC-D	GUCY2F	guanylate cyclase activity	cGMP biosynthetic process	integral component of membrane
GENE.evgMSTRG.81504.1~~evgMSTRG.81504.1.p1	-5.54675	1.56369	0.000389317	0.0185418	evgMSTRG.81504.1.p1	hypothetical protein evm_013747 [Chilo suppressalis]	3.69e-09	NA	NA	NA	NA	NA
GENE.evgMSTRG.75238.5~~evgMSTRG.75238.5.p1	-3.17836	0.896243	0.000390668	0.0185551	evgMSTRG.75238.5.p1	PREDICTED: uncharacterized protein LOC100208163 isoform X2 [Hydra vulgaris]	1.8e-124	RNA-binding protein with multiple splicing	NA	RNA binding	hemidesmosome assembly	nucleus
GENE.evgHyS_ScswcV5_3964.g17734.t1~~evgHyS_ScswcV5_3964.g17734.t1.p1	-5.742	1.62353	0.000405108	0.0190912	evgHyS_ScswcV5_3964.g17734.t1.p1	group XV phospholipase A2-like [Stylophora pistillata]	9.43e-133	Phosphatidylcholine-sterol O-acyltransferase	PLA2G15	O-acyltransferase activity	lipid metabolic process	vacuole
GENE.evgMSTRG.91455.1~~evgMSTRG.91455.1.p1	-4.017	1.13583	0.000405259	0.0190912	evgMSTRG.91455.1.p1	PREDICTED: uncharacterized protein LOC100203068 isoform X1 [Hydra vulgaris]	1.68e-79	NA	NA	NA	NA	NA
GENE.evgHyS_ScswcV5_4378.g20861.t1~~evgHyS_ScswcV5_4378.g20861.t1.p1	-4.55748	1.28949	0.000408828	0.0192071	evgHyS_ScswcV5_4378.g20861.t1.p1	PREDICTED: uncharacterized protein LOC100213236 [Hydra vulgaris]	0	NA	NA	NA	NA	NA
GENE.evgtrinLocDN1578c0g1t16~~evgtrinLocDN1578c0g1t16.p1	-2.49614	0.708633	0.000427535	0.019924	evgtrinLocDN1578c0g1t16.p1	PREDICTED: uncharacterized protein LOC100208603 [Hydra vulgaris]	9.31e-128	NA	NA	NA	NA	NA
GENE.evgHyS_ScswcV5_664.g2716.t1~~evgHyS_ScswcV5_664.g2716.t1.p1	-7.26201	2.06811	0.000445706	0.0206598	evgHyS_ScswcV5_664.g2716.t1.p1	hypothetical protein BC937DRAFT_87754 [Endogone sp. FLAS-F59071]	4.18e-34	NA	NA	NA	NA	NA
GENE.evgHyS_ScswcV5_3964.g17725.t1~~evgHyS_ScswcV5_3964.g17725.t1.p1	-2.57936	0.734795	0.000447586	0.0206724	evgHyS_ScswcV5_3964.g17725.t1.p1	PREDICTED: uncharacterized protein LOC100203318 [Hydra vulgaris]	3.14e-10	NA	NA	NA	NA	NA
GENE.evgtrinLocDN80481c0g1t1~~evgtrinLocDN80481c0g1t1.p1	-8.18723	2.33295	0.000449145	0.0206724	evgtrinLocDN80481c0g1t1.p1	predicted protein [Nematostella vectensis]	5.89e-13	NA	NA	NA	NA	NA
GENE.evgHyS_ScswcV5_1000.g4078.t1~~evgHyS_ScswcV5_1000.g4078.t1.p1	-5.23644	1.49223	0.000449556	0.0206724	evgHyS_ScswcV5_1000.g4078.t1.p1	PREDICTED: MORN repeat-containing protein 4-like [Hydra vulgaris]	2.91e-62	MORN repeat-containing protein 4	NA	kinase activity	phosphorylation	axoneme
GENE.evgHyS_ScswcV5_3781.g16352.t1~~evgHyS_ScswcV5_3781.g16352.t1.p1	-8.90629	2.53925	0.000452432	0.0207496	evgHyS_ScswcV5_3781.g16352.t1.p1	PREDICTED: uncharacterized protein LOC105843588 [Hydra vulgaris]	6.39e-13	NA	NA	NA	NA	NA
GENE.evgHyS_ScswcV5_4051.g18250.t1~~evgHyS_ScswcV5_4051.g18250.t1.p1	-6.08908	1.73947	0.000464326	0.0210721	evgHyS_ScswcV5_4051.g18250.t1.p1	serine protease 1, partial [Aurelia aurita]	1.01e-65	Transmembrane serine protease 3	CTRL	serine-type endopeptidase activity	proteolysis	extracellular space
GENE.evgtrinLocDN24713c0g1t4~~evgtrinLocDN24713c0g1t4.p1	-4.25359	1.21633	0.000470409	0.0212924	evgtrinLocDN24713c0g1t4.p1	PREDICTED: protein N-terminal glutamine amidohydrolase-like [Hydra vulgaris]	7.41e-95	LOW QUALITY PROTEIN: protein N-terminal glutamine amidohydrolase	WDYHV1	protein-N-terminal glutamine amidohydrolase activity	cellular protein modification process	cytosol
GENE.evgtrinLocDN841c0g1t10~~evgtrinLocDN841c0g1t10.p1	-6.65981	1.9093	0.00048649	0.0218984	evgtrinLocDN841c0g1t10.p1	PREDICTED: craniofacial development protein 2-like [Saccoglossus kowalevskii]	6.49e-06	NA	NA	NA	NA	NA
GENE.evgMSTRG.75856.1~~evgMSTRG.75856.1.p1	-7.96902	2.28503	0.000487585	0.0218984	evgMSTRG.75856.1.p1	universal stress protein [Enteroscipio rubneri]	0.11	NA	NA	NA	NA	NA
GENE.evgHyS_ScswcV5_1325.g4921.t1~~evgHyS_ScswcV5_1325.g4921.t1.p1	-5.48767	1.58298	0.000526964	0.0232458	evgHyS_ScswcV5_1325.g4921.t1.p1	PREDICTED: mitogen-activated protein kinase kinase kinase 12-like [Hydra vulgaris]	0	Mitogen-activated protein kinase kinase kinase	MAP3K12	MAP kinase kinase kinase activity	activation of MAPKK activity	axon
GENE.evgMSTRG.16134.1~~evgMSTRG.16134.1.p1	-8.07228	2.32855	0.000526972	0.0232458	evgMSTRG.16134.1.p1	predicted protein [Nematostella vectensis]	1e-55	Chromodomain protein	NA	nucleic acid binding	DNA integration	nucleus
GENE.evgtrinLocDN43473c0g1t9~~evgtrinLocDN43473c0g1t9.p1	-5.28442	1.52647	0.000536468	0.0236046	evgtrinLocDN43473c0g1t9.p1	PREDICTED: uncharacterized protein K02A2.6-like [Priapulus caudatus]	1.4e-18	NA	NA	NA	NA	NA
GENE.evgtrinLocDN2468c2g1t6~~evgtrinLocDN2468c2g1t6.p1	-7.12707	2.06278	0.000550113	0.0240348	evgtrinLocDN2468c2g1t6.p1	hypothetical protein AC249_AIPGENE28114 [Exaiptasia pallida]	1.42e-31	NA	NA	NA	NA	NA
GENE.evgtrinLocDN23406c1g2t1~~evgtrinLocDN23406c1g2t1.p1	-8.07121	2.33613	0.000550404	0.0240348	evgtrinLocDN23406c1g2t1.p1	hypothetical protein DRQ32_08175 [bacterium]	5.9	NA	NA	NA	NA	NA
GENE.evgHyS_ScswcV5_4075.g18644.t1~~evgHyS_ScswcV5_4075.g18644.t1.p1	-6.24177	1.80964	0.000562309	0.0243809	evgHyS_ScswcV5_4075.g18644.t1.p1	PREDICTED: thymidylate synthase-like [Hydra vulgaris]	3.86e-170	Bifunctional dihydrofolate reductase-thymidylate synthase	NA	thymidylate synthase activity	dTMP biosynthetic process	mitochondrion
GENE.evgtrinLocDN34331c0g1t4~~evgtrinLocDN34331c0g1t4.p1	-4.87582	1.41367	0.00056255	0.0243809	evgtrinLocDN34331c0g1t4.p1	hypothetical protein [Bacillus smithii]	1.3	NA	NA	NA	NA	NA
GENE.evgMSTRG.34276.1~~evgMSTRG.34276.1.p1	-3.94594	1.14491	0.000567873	0.0245502	evgMSTRG.34276.1.p1	ankyrin repeat protein [Trichomonas vaginalis G3]	6.52e-12	NA	NA	NA	NA	NA
GENE.evgHyS_ScswcV5_3906.g17338.t1~~evgHyS_ScswcV5_3906.g17338.t1.p1	-7.28201	2.11477	0.000574449	0.0247113	evgHyS_ScswcV5_3906.g17338.t1.p1	PREDICTED: uncharacterized protein LOC105844041 [Hydra vulgaris]	1.12e-34	NA	NA	NA	NA	NA
GENE.evgHyS_ScswcV5_2832.g11524.t1~~evgHyS_ScswcV5_2832.g11524.t1.p1	-6.84984	1.98981	0.000576444	0.0247357	evgHyS_ScswcV5_2832.g11524.t1.p1	PREDICTED: alkaline phosphatase-like [Hydra vulgaris]	0	Embryonic alkaline phosphatase	ALPL	alkaline phosphatase activity	dephosphorylation	extracellular membrane-bounded organelle
GENE.evgMSTRG.112145.1~~evgMSTRG.112145.1.p1	-6.77945	1.97155	0.000584665	0.025025	evgMSTRG.112145.1.p1	PREDICTED: uncharacterized protein LOC100214133 [Hydra vulgaris]	9.23e-110	NA	NA	NA	NA	NA
GENE.evgMSTRG.9690.1~~evgMSTRG.9690.1.p1	-8.11425	2.36018	0.000586073	0.025025	evgMSTRG.9690.1.p1	pyruvate, phosphate dikinase family protein [Trichomonas vaginalis G3]	1.1	NA	NA	NA	NA	NA
GENE.evgtrinLocDN14728c0g1t5~~evgtrinLocDN14728c0g1t5.p1	-3.93475	1.14526	0.000591089	0.0251155	evgtrinLocDN14728c0g1t5.p1	allatostatin-A receptor-like [Pocillopora damicornis]	0.000201	NA	NA	NA	NA	NA
GENE.evgtrinLocDN22820c0g1t15~~evgtrinLocDN22820c0g1t15.p2	-3.62328	1.05731	0.000610527	0.0256896	NA	NA	NA	NA	NA	NA	NA	NA
GENE.evgMSTRG.46892.1~~evgMSTRG.46892.1.p2	-5.17452	1.51169	0.000619305	0.0257465	evgMSTRG.46892.1.p2	trace amine-associated receptor 13c-like [Mastacembelus armatus]	0.011	NA	NA	NA	NA	NA
GENE.evgtrinLocDN34057c0g1t4~~evgtrinLocDN34057c0g1t4.p1	-7.85008	2.29708	0.000632191	0.0261567	evgtrinLocDN34057c0g1t4.p1	uncharacterized protein LOC111323626 [Stylophora pistillata]	1.08e-13	NA	NA	NA	NA	NA
GENE.evgtrinLocDN29926c1g1t1~~evgtrinLocDN29926c1g1t1.p1	-5.03399	1.47455	0.000640372	0.0264292	evgtrinLocDN29926c1g1t1.p1	hypothetical protein CAEBREN_12401 [Caenorhabditis brenneri]	6.2	NA	NA	NA	NA	NA
GENE.evgMSTRG.37032.2~~evgMSTRG.37032.2.p1	-4.13176	1.21105	0.000645584	0.0265209	evgMSTRG.37032.2.p1	PREDICTED: uncharacterized protein LOC100201907 [Hydra vulgaris]	0	NA	NA	NA	NA	NA
GENE.evgHyS_ScswcV5_2402.g8865.t1~~evgHyS_ScswcV5_2402.g8865.t1.p1	-3.95735	1.16057	0.000650035	0.0266407	evgHyS_ScswcV5_2402.g8865.t1.p1	glycoprotein hormone-like secreted protein [Tripedalia cystophora]	0.000372	NA	NA	NA	NA	NA
GENE.evgMSTRG.57478.1~~evgMSTRG.57478.1.p1	-6.44409	1.89536	0.000674053	0.027495	evgMSTRG.57478.1.p1	PREDICTED: uncharacterized protein LOC107352686 [Acropora digitifera]	2.45e-44	NA	NA	NA	NA	NA
GENE.evgHyS_ScswcV5_3574.g15359.t1~~evgHyS_ScswcV5_3574.g15359.t1.p1	-4.12632	1.21441	0.000679291	0.0275867	evgHyS_ScswcV5_3574.g15359.t1.p1	PREDICTED: uncharacterized protein K02A2.6-like, partial [Priapulus caudatus]	1.83e-32	NA	NA	NA	NA	NA
GENE.evgtrinLocDN367c0g1t13~~evgtrinLocDN367c0g1t13.p1	-3.99251	1.17505	0.000679484	0.0275867	evgtrinLocDN367c0g1t13.p1	diacylglycerol kinase eta-like [Acanthochromis polyacanthus]	1.02e-112	Diacylglycerol kinase eta	NA	diacylglycerol kinase activity	protein kinase C-activating G protein-coupled receptor signaling pathway	cytosol
GENE.evgtrinLocDN14581c1g1t3~~evgtrinLocDN14581c1g1t3.p1	-8.08514	2.3803	0.00068208	0.0276274	evgtrinLocDN14581c1g1t3.p1	uncharacterized protein LOC110045927, partial [Orbicella faveolata]	4.62e-10	NA	NA	NA	NA	NA
GENE.evgtrinLocDN6940c2g1t2~~evgtrinLocDN6940c2g1t2.p1	-8.90782	2.62559	0.000692086	0.0278938	evgtrinLocDN6940c2g1t2.p1	insulinase family protein [Haemophilus quentini]	0.67	NA	NA	NA	NA	NA
GENE.evgMSTRG.4079.1~~evgMSTRG.4079.1.p1	-6.78658	2.00151	0.00069707	0.0279732	evgMSTRG.4079.1.p1	PREDICTED: uncharacterized protein LOC100893887 [Strongylocentrotus purpuratus]	3.49e-80	NA	NA	NA	NA	NA
GENE.evgMSTRG.38037.3~~evgMSTRG.38037.3.p1	-3.58567	1.05803	0.000701439	0.0280835	evgMSTRG.38037.3.p1	PREDICTED: kinesin-II 85 kDa subunit-like [Hydra vulgaris]	0	Kinesin-II 95 kDa subunit	NA	microtubule motor activity	microtubule-based movement	microtubule
GENE.evgtrinLocDN54814c0g2t5~~evgtrinLocDN54814c0g2t5.p1	-5.49432	1.62207	0.000706028	0.0281268	NA	NA	NA	NA	NA	NA	NA	NA
GENE.evgtrinLocDN30385c0g1t19~~evgtrinLocDN30385c0g1t19.p1	-6.48486	1.91465	0.000706711	0.0281268	evgtrinLocDN30385c0g1t19.p1	sensor histidine kinase [Psychroserpens sp. Hel_I_66]	2.6	NA	NA	NA	NA	NA
GENE.evgtrinLocDN54922c1g1t14~~evgtrinLocDN54922c1g1t14.p1	-5.71239	1.68671	0.000707389	0.0281268	evgtrinLocDN54922c1g1t14.p1	uncharacterized protein LOC110232386 [Exaiptasia pallida]	2.27e-39	NA	NA	NA	NA	NA
GENE.evgtrinLocDN10996c0g1t11~~evgtrinLocDN10996c0g1t11.p1	-2.9147	0.862485	0.000726388	0.0287504	evgtrinLocDN10996c0g1t11.p1	PREDICTED: uncharacterized protein LOC100368426 [Saccoglossus kowalevskii]	8.55e-86	NA	NA	NA	NA	NA
GENE.evgHyS_ScswcV5_4062.g18431.t1~~evgHyS_ScswcV5_4062.g18431.t1.p1	-5.16225	1.52814	0.000729798	0.0288196	evgHyS_ScswcV5_4062.g18431.t1.p1	innexin inx1-like [Hydra vulgaris]	3.12e-164	Innexin	NA	NA	ion transport	gap junction
GENE.evgtrinLocDN1946c1g1t3~~evgtrinLocDN1946c1g1t3.p1	-4.53137	1.34234	0.000736241	0.0288522	evgtrinLocDN1946c1g1t3.p1	hypothetical protein AC249_AIPGENE26930 [Exaiptasia pallida]	2.49e-09	NA	NA	NA	NA	NA
GENE.evgtrinLocDN6766c0g3t1~~evgtrinLocDN6766c0g3t1.p1	-7.86692	2.33091	0.000738031	0.0288522	evgtrinLocDN6766c0g3t1.p1	uncharacterized protein LOC111319352 [Stylophora pistillata]	9.11e-30	NA	NA	NA	NA	NA
GENE.evgHyS_ScswcV5_1325.g4916.t1~~evgHyS_ScswcV5_1325.g4916.t1.p1	-2.80839	0.832112	0.000738107	0.0288522	evgHyS_ScswcV5_1325.g4916.t1.p1	PREDICTED: uncharacterized protein LOC100197733 [Hydra vulgaris]	6.21e-176	NA	NA	NA	NA	NA
GENE.evgHyS_ScswcV5_3094.g12216.t1~~evgHyS_ScswcV5_3094.g12216.t1.p1	-4.49519	1.33262	0.000743044	0.0288522	evgHyS_ScswcV5_3094.g12216.t1.p1	PREDICTED: arachidonate 5-lipoxygenase-like [Hydra vulgaris]	7.19e-148	NA	NA	NA	NA	NA
GENE.evgtrinLocDN44913c0g1t3~~evgtrinLocDN44913c0g1t3.p1	-3.84311	1.14263	0.000769899	0.029726	evgtrinLocDN44913c0g1t3.p1	PREDICTED: hypoxia up-regulated protein 1-like [Acropora digitifera]	0.57	NA	NA	NA	NA	NA
GENE.evgHyS_ScswcV5_1325.g4788.t1~~evgHyS_ScswcV5_1325.g4788.t1.p1	-4.42585	1.31645	0.000773895	0.0297478	evgHyS_ScswcV5_1325.g4788.t1.p1	PREDICTED: alpha-1,3-mannosyl-glycoprotein 4-beta-N-acetylglucosaminyltransferase A-like, partial [Hydra vulgaris]	9.23e-130	Alpha-1,3-mannosyl-glycoprotein 4-beta-N-acetylglucosaminyltransferase A	MGAT4A	transferase activity, transferring glycosyl groups	protein N-linked glycosylation	Golgi membrane
GENE.evgtrinLocDN59815c0g1t1~~evgtrinLocDN59815c0g1t1.p1	-6.20384	1.84695	0.000782323	0.029939	NA	NA	NA	NA	NA	NA	NA	NA
GENE.evgHyS_ScswcV5_26.g196.t1~~evgHyS_ScswcV5_26.g196.t1.p1	-4.62473	1.37747	0.000786779	0.0300432	evgHyS_ScswcV5_26.g196.t1.p1	PREDICTED: tankyrase-2-like [Hydra vulgaris]	5.86e-143	Phosphocholine transferase AnkX	NA	p53 binding	histone lysine methylation	chromosome
GENE.evgMSTRG.61063.1~~evgMSTRG.61063.1.p1	-4.91436	1.46591	0.000801092	0.0302565	evgMSTRG.61063.1.p1	Uncharacterized protein 259R [Exaiptasia pallida]	4.06e-37	NA	NA	NA	NA	NA
GENE.evgtrinLocDN421052c0g1t13~~evgtrinLocDN421052c0g1t13.p1	-6.12087	1.83089	0.000828452	0.0310867	evgtrinLocDN421052c0g1t13.p1	Multi-sensor hybrid histidine kinase [Parcubacteria group bacterium GW2011_GWF2_45_11]	5.8	NA	NA	NA	NA	NA
GENE.evgHyS_ScswcV5_1733.g5653.t1~~evgHyS_ScswcV5_1733.g5653.t1.p1	-5.09418	1.52586	0.000842131	0.0315173	evgHyS_ScswcV5_1733.g5653.t1.p1	PREDICTED: uncharacterized protein LOC100209737 [Hydra vulgaris]	1.05e-120	NA	NA	NA	NA	NA
GENE.evgHyS_ScswcV5_3062.g12107.t1~~evgHyS_ScswcV5_3062.g12107.t1.p1	-4.70851	1.41056	0.000843686	0.0315173	evgHyS_ScswcV5_3062.g12107.t1.p1	PREDICTED: synaptotagmin-15-like [Hydra vulgaris]	1.35e-117	NA	NA	NA	NA	NA
GENE.evgHyS_ScswcV5_26.g195.t1~~evgHyS_ScswcV5_26.g195.t1.p1	-5.46252	1.6404	0.000868487	0.032151	NA	NA	NA	NA	NA	NA	NA	NA
GENE.evgHyS_ScswcV5_2750.g11282.t1~~evgHyS_ScswcV5_2750.g11282.t1.p1	-7.11668	2.13757	0.000870555	0.032151	evgHyS_ScswcV5_2750.g11282.t1.p1	PREDICTED: uncharacterized protein LOC105848858 [Hydra vulgaris]	2.04e-71	NA	NA	NA	NA	NA
GENE.evgtrinLocDN33761c0g2t4~~evgtrinLocDN33761c0g2t4.p1	-5.21444	1.56638	0.000871654	0.032151	evgtrinLocDN33761c0g2t4.p1	hypothetical protein HMPREF1544_08667 [Mucor circinelloides f. circinelloides 1006PhL]	1.1	NA	NA	NA	NA	NA
GENE.evgtrinLocDN6044c0g3t1~~evgtrinLocDN6044c0g3t1.p1	-7.14268	2.1464	0.000875531	0.0322255	evgtrinLocDN6044c0g3t1.p1	PREDICTED: alpha-1A adrenergic receptor-like [Hydra vulgaris]	0.17	NA	NA	NA	NA	NA
GENE.evgMSTRG.100222.7~~evgMSTRG.100222.7.p1	-2.31392	0.696264	0.000889474	0.0325315	evgMSTRG.100222.7.p1	PREDICTED: microsomal glutathione S-transferase 2-like [Hydra vulgaris]	2.45e-26	NA	NA	NA	NA	NA
GENE.evgHyS_ScswcV5_3796.g16418.t1~~evgHyS_ScswcV5_3796.g16418.t1.p1	-2.68833	0.813169	0.000946404	0.0344682	evgHyS_ScswcV5_3796.g16418.t1.p1	PREDICTED: tyrosine-protein phosphatase non-receptor type 22-like [Hydra vulgaris]	3.46e-122	NA	NA	NA	NA	NA
GENE.evgtrinLocDN307337c0g2t1~~evgtrinLocDN307337c0g2t1.p1	-8.70756	2.63434	0.000948408	0.0344688	evgtrinLocDN307337c0g2t1.p1	hypothetical protein [Alteromonas macleodii]	6.29e-138	NA	NA	NA	NA	NA
GENE.evgMSTRG.133166.2~~evgMSTRG.133166.2.p1	-2.38603	0.723604	0.000975733	0.035167	evgMSTRG.133166.2.p1	hypothetical protein PTSG_10198 [Salpingoeca rosetta]	5.17e-126	Small GTPase Rac protein 1	RAC3	GTPase activity	small GTPase mediated signal transduction	filamentous actin
GENE.evgHyS_ScswcV5_3298.g13343.t1~~evgHyS_ScswcV5_3298.g13343.t1.p1	-6.5712	2.00377	0.00104021	0.0371817	evgHyS_ScswcV5_3298.g13343.t1.p1	predicted protein [Nematostella vectensis]	4.98e-138	Animal haem peroxidase	TPO	iodide peroxidase activity	thyroid hormone generation	integral component of membrane
GENE.evgMSTRG.30401.1~~evgMSTRG.30401.1.p1	-3.58549	1.09376	0.00104499	0.037199	evgMSTRG.30401.1.p1	ViaA family protein, partial [Staphylococcus hominis VCU122]	0.75	NA	NA	NA	NA	NA
GENE.evgtrinLocDN4404c0g1t6~~evgtrinLocDN4404c0g1t6.p1	-5.11955	1.56331	0.00105727	0.0375592	evgtrinLocDN4404c0g1t6.p1	PREDICTED: uncharacterized protein LOC106819238 [Priapulus caudatus]	2.38e-47	Gag-Pol polyprotein	GAG-POL	nucleic acid binding	DNA integration	NA
GENE.evgHyS_ScswcV5_3964.g17634.t1~~evgHyS_ScswcV5_3964.g17634.t1.p1	-5.82694	1.78052	0.00106565	0.0377792	evgHyS_ScswcV5_3964.g17634.t1.p1	331-2 propeptide [Malo kingi]	3.76e-11	NA	NA	NA	NA	NA
GENE.evgtrinLocDN4150c0g1t2~~evgtrinLocDN4150c0g1t2.p1	-4.63972	1.4196	0.00108184	0.038275	evgtrinLocDN4150c0g1t2.p1	hypothetical protein CAPTEDRAFT_213860 [Capitella teleta]	1.45e-24	NA	NA	NA	NA	NA
GENE.evgtrinLocDN27907c0g1t1~~evgtrinLocDN27907c0g1t1.p1	-6.51576	1.99452	0.00108758	0.0383998	evgtrinLocDN27907c0g1t1.p1	hypothetical protein BpHYR1_012004 [Brachionus plicatilis]	5.48e-81	Membrane-associated protein, putative	NA	NA	NA	NA
GENE.evgHyS_ScswcV5_4378.g20658.t1~~evgHyS_ScswcV5_4378.g20658.t1.p1	-2.14642	0.65735	0.00109363	0.0385185	evgHyS_ScswcV5_4378.g20658.t1.p1	PREDICTED: collagen alpha-4(VI) chain-like [Hydra vulgaris]	3.04e-144	NA	NA	NA	NA	NA
GENE.evgHyS_ScswcV5_1783.g7050.t1~~evgHyS_ScswcV5_1783.g7050.t1.p1	-4.07304	1.24762	0.00109605	0.0385185	evgHyS_ScswcV5_1783.g7050.t1.p1	PREDICTED: kinesin-like protein KIF28P [Hydra vulgaris]	0	Kinesin-related protein 1	NA	microtubule motor activity	microtubule-based movement	microtubule
GENE.evgMSTRG.139951.1~~evgMSTRG.139951.1.p1	-3.69474	1.13532	0.0011365	0.0394836	evgMSTRG.139951.1.p1	PREDICTED: uncharacterized protein LOC107738138 [Sinocyclocheilus rhinocerous]	3.26e-24	NA	NA	NA	NA	NA
GENE.evgMSTRG.22930.1~~evgMSTRG.22930.1.p1	-4.20309	1.2921	0.0011423	0.0396057	evgMSTRG.22930.1.p1	predicted protein [Nematostella vectensis]	5.24e-47	NA	NA	NA	NA	NA
GENE.evgHyS_ScswcV5_1325.g4733.t1~~evgHyS_ScswcV5_1325.g4733.t1.p1	-3.61448	1.11183	0.00115034	0.0398048	evgHyS_ScswcV5_1325.g4733.t1.p1	PREDICTED: TGF-beta-activated kinase 1 and MAP3K7-binding protein 1-like [Hydra vulgaris]	3.16e-143	Mitogen-activated protein kinase kinase kinase 7-interacting protein 1	TAB1	protein serine/threonine phosphatase activity	protein dephosphorylation	nuclear speck
GENE.evgtrinLocDN25672c0g1t14~~evgtrinLocDN25672c0g1t14.p1	-3.38137	1.04376	0.00119697	0.0411718	evgtrinLocDN25672c0g1t14.p1	PREDICTED: gamma-glutamyltranspeptidase 1-like [Hydra vulgaris]	5.11e-135	Gamma-glutamyltranspeptidase periplasmic	GGT	glutathione hydrolase activity	glutathione catabolic process	integral component of membrane
GENE.evgtrinLocDN52057c0g1t8~~evgtrinLocDN52057c0g1t8.p1	-5.12772	1.58395	0.00120669	0.0413047	evgtrinLocDN52057c0g1t8.p1	hypothetical protein JAAARDRAFT_32822 [Jaapia argillacea MUCL 33604]	9.8	NA	NA	NA	NA	NA
GENE.evgHyS_ScswcV5_644.g2357.t1~~evgHyS_ScswcV5_644.g2357.t1.p1	-3.28617	1.01585	0.00121688	0.0415271	evgHyS_ScswcV5_644.g2357.t1.p1	TPA_exp: minicollagen 7 [Hydra vulgaris]	9.5e-06	Collagen triple helix repeat domain containing protein	NA	extracellular matrix structural constituent	extracellular matrix organization	collagen trimer
GENE.evgHyS_ScswcV5_2444.g9402.t1~~evgHyS_ScswcV5_2444.g9402.t1.p1	-5.68496	1.76191	0.00125271	0.0426659	evgHyS_ScswcV5_2444.g9402.t1.p1	TNF receptor-associated factor 6-B-like isoform X1 [Orbicella faveolata]	2.35e-34	NA	NA	NA	NA	NA
GENE.evgtrinLocDN213067c0g1t6~~evgtrinLocDN213067c0g1t6.p1	-6.36429	1.97577	0.00127669	0.0431435	evgtrinLocDN213067c0g1t6.p1	hypothetical protein pdam_00018466 [Pocillopora damicornis]	5.33e-14	NA	NA	NA	NA	NA
GENE.evgtrinLocDN564c1g1t3~~evgtrinLocDN564c1g1t3.p1	-4.07057	1.26401	0.00128023	0.0431792	evgtrinLocDN564c1g1t3.p1	Extracellular calcium-sensing receptor [Stylophora pistillata]	1.29e-31	NA	NA	NA	NA	NA
GENE.evgtrinLocDN32508c0g1t19~~evgtrinLocDN32508c0g1t19.p1	-6.7586	2.10344	0.00131302	0.0441991	evgtrinLocDN32508c0g1t19.p1	PREDICTED: nose resistant to fluoxetine protein 6-like [Hydra vulgaris]	9.2e-114	Nose resistant to fluoxetine protein 6	NA	transferase activity, transferring acyl groups other than amino-acyl groups	regulation of apoptotic process	integral component of membrane
GENE.evgHyS_ScswcV5_3574.g15508.t1~~evgHyS_ScswcV5_3574.g15508.t1.p1	-3.48802	1.08689	0.00133109	0.0446341	evgHyS_ScswcV5_3574.g15508.t1.p1	PMP1 protein [Podocoryna carnea]	6.24e-112	Zinc metalloproteinase	NA	metalloendopeptidase activity	proteolysis	extracellular region
GENE.evgHyS_ScswcV5_3574.g15414.t1~~evgHyS_ScswcV5_3574.g15414.t1.p1	-3.82869	1.19385	0.00134122	0.0448002	evgHyS_ScswcV5_3574.g15414.t1.p1	PREDICTED: uncharacterized protein LOC109486022 [Branchiostoma belcheri]	6.01e-55	NA	NA	NA	NA	NA
GENE.evgHyS_ScswcV5_3305.g13706.t1~~evgHyS_ScswcV5_3305.g13706.t1.p1	-3.32269	1.03767	0.00136448	0.0454025	evgHyS_ScswcV5_3305.g13706.t1.p1	predicted protein [Nematostella vectensis]	5.9e-47	NA	NA	NA	NA	NA
GENE.evgMSTRG.133171.3~~evgMSTRG.133171.3.p2	-2.79398	0.872795	0.00136865	0.045454	evgMSTRG.133171.3.p2	ras-related C3 botulinum toxin substrate 1 [Diaphorina citri]	2.78e-28	Small GTPase Rac protein 1	NA	GTPase activity	small GTPase mediated signal transduction	plasma membrane bounded cell projection
GENE.evgMSTRG.65197.1~~evgMSTRG.65197.1.p1	-3.94626	1.23386	0.00138235	0.0457337	evgMSTRG.65197.1.p1	glycosyltransferase WbuB [Nostoc sp. 3335mG]	5.4	NA	NA	NA	NA	NA
GENE.evgtrinLocDN63692c0g1t17~~evgtrinLocDN63692c0g1t17.p1	-6.38639	1.9989	0.00139854	0.0460212	evgtrinLocDN63692c0g1t17.p1	coadhesin-like [Stylophora pistillata]	2.11e-36	NA	NA	NA	NA	NA
GENE.evgMSTRG.126346.1~~evgMSTRG.126346.1.p5	-4.22943	1.32506	0.00141354	0.0464114	evgMSTRG.126346.1.p5	DNA polymerase III subunit gamma/tau [Asticcacaulis sp. CF398]	4	NA	NA	NA	NA	NA
GENE.evgtrinLocDN43761c0g2t10~~evgtrinLocDN43761c0g2t10.p1	-4.99007	1.56395	0.00141939	0.0465153	evgtrinLocDN43761c0g2t10.p1	PREDICTED: uncharacterized protein LOC105843325 [Hydra vulgaris]	9.39e-25	NA	NA	NA	NA	NA
GENE.evgMSTRG.22679.5~~evgMSTRG.22679.5.p1	-2.20054	0.690036	0.00142757	0.0466069	evgMSTRG.22679.5.p1	PREDICTED: myosin-6-like [Hydra vulgaris]	4.39e-137	NA	NA	NA	NA	NA
GENE.evgHyS_ScswcV5_4378.g20638.t1~~evgHyS_ScswcV5_4378.g20638.t1.p1	-6.65105	2.08807	0.00144621	0.0468625	evgHyS_ScswcV5_4378.g20638.t1.p1	PREDICTED: neurexin-1b-like [Hydra vulgaris]	4.19e-27	NA	NA	NA	NA	NA
GENE.evgtrinLocDN2904c0g1t4~~evgtrinLocDN2904c0g1t4.p1	-5.10566	1.60364	0.00145359	0.0469416	evgtrinLocDN2904c0g1t4.p1	Calcium-binding and coiled-coil domain-containing protein 2 [Fukomys damarensis]	0.15	NA	NA	NA	NA	NA
GENE.evgHyS_ScswcV5_664.g2812.t1~~evgHyS_ScswcV5_664.g2812.t1.p1	-5.81491	1.82787	0.00146644	0.0471654	evgHyS_ScswcV5_664.g2812.t1.p1	hypothetical protein C1645_840398 [Glomus cerebriforme]	5.14e-66	NA	NA	NA	NA	NA
GENE.evgHyS_ScswcV5_3781.g16159.t1~~evgHyS_ScswcV5_3781.g16159.t1.p1	-3.19083	1.0062	0.00151825	0.0482942	evgHyS_ScswcV5_3781.g16159.t1.p1	PREDICTED: arachidonate 5-lipoxygenase-like [Hydra vulgaris]	5.5e-136	NA	NA	NA	NA	NA
GENE.evgtrinLocDN22710c0g1t5~~evgtrinLocDN22710c0g1t5.p1	-3.98942	1.2591	0.00153246	0.048657	NA	NA	NA	NA	NA	NA	NA	NA
GENE.evgtrinLocDN16098c2g1t1~~evgtrinLocDN16098c2g1t1.p1	-3.86562	1.22136	0.00155077	0.0491483	evgtrinLocDN16098c2g1t1.p1	PREDICTED: ADP-ribosylation factor-like protein 15 [Hydra vulgaris]	9.73e-48	NA	NA	NA	NA	NA
GENE.evgHyS_ScswcV5_4204.g19176.t1~~evgHyS_ScswcV5_4204.g19176.t1.p1	-3.67306	1.16129	0.00156197	0.0492334	evgHyS_ScswcV5_4204.g19176.t1.p1	succinyl-CoA:3-ketoacid coenzyme A transferase 1, mitochondrial-like [Penaeus vannamei]	0	Succinyl-CoA:3-ketoacid-coenzyme A transferase	OXCT1	3-oxoacid CoA-transferase activity	ketone body catabolic process	mitochondrion
GENE.evgHyS_ScswcV5_66.g508.t1~~evgHyS_ScswcV5_66.g508.t1.p1	-4.4061	1.39422	0.00157622	0.0495922	evgHyS_ScswcV5_66.g508.t1.p1	PREDICTED: gamma-aminobutyric acid type B receptor subunit 2-like isoform X4 [Acropora digitifera]	1.37e-111	Gamma-aminobutyric acid type B receptor subunit 2	GABBR2	G protein-coupled GABA receptor activity	G protein-coupled receptor signaling pathway	G protein-coupled receptor heterodimeric complex
GENE.evgtrinLocDN26740c0g1t1~~evgtrinLocDN26740c0g1t1.p1	-3.81217	1.20683	0.00158402	0.0497475	evgtrinLocDN26740c0g1t1.p1	PREDICTED: pleckstrin homology domain-containing family G member 5-like [Hydra vulgaris]	4.01e-140	NA	NA	NA	NA	NA
GENE.evgtrinLocDN4361c0g1t7~~evgtrinLocDN4361c0g1t7.p1	-8.10547	2.57284	0.00163049	0.0508385	evgtrinLocDN4361c0g1t7.p1	aminoglycoside phosphotransferase [Labrenzia alba]	0.049	NA	NA	NA	NA	NA
GENE.evgHyS_ScswcV5_3094.g12171.t1~~evgHyS_ScswcV5_3094.g12171.t1.p1	-3.81479	1.21129	0.00163628	0.0508753	evgHyS_ScswcV5_3094.g12171.t1.p1	PREDICTED: uncharacterized protein LOC100198647 isoform X4 [Hydra vulgaris]	4.16e-150	NA	NA	NA	NA	NA
GENE.evgtrinLocDN6432c0g1t8~~evgtrinLocDN6432c0g1t8.p3	-3.69353	1.17329	0.00164384	0.0509797	evgtrinLocDN6432c0g1t8.p3	PREDICTED: uncharacterized protein LOC105849173, partial [Hydra vulgaris]	1.4e-11	NA	NA	NA	NA	NA
GENE.evgtrinLocDN1712c0g1t1~~evgtrinLocDN1712c0g1t1.p1	-5.5558	1.7657	0.0016523	0.0511503	evgtrinLocDN1712c0g1t1.p1	hypothetical protein VR65_04180 [Desulfobulbaceae bacterium BRH_c16a]	2.3	NA	NA	NA	NA	NA
GENE.evgHyS_ScswcV5_98.g756.t1~~evgHyS_ScswcV5_98.g756.t1.p1	-2.46116	0.78238	0.00165668	0.0511947	evgHyS_ScswcV5_98.g756.t1.p1	PREDICTED: carnitine O-palmitoyltransferase 1, liver isoform [Hydra vulgaris]	0	Carnitine palmitoyltransferase I	NA	transferase activity, transferring acyl groups	response to ethanol	integral component of membrane
GENE.evgHyS_ScswcV5_3781.g16222.t1~~evgHyS_ScswcV5_3781.g16222.t1.p1	-6.20874	1.97799	0.00169579	0.0520323	evgHyS_ScswcV5_3781.g16222.t1.p1	PREDICTED: zinc finger protein 26-like [Hydra vulgaris]	1.18e-139	Zinc finger protein 333	NA	nucleic acid binding	regulation of transcription, DNA-templated	nucleus
GENE.evgtrinLocDN1372c5g1t3~~evgtrinLocDN1372c5g1t3.p1	-4.09236	1.30491	0.00171191	0.0523537	NA	NA	NA	NA	NA	NA	NA	NA
GENE.evgtrinLocDN87898c0g1t5~~evgtrinLocDN87898c0g1t5.p2	-7.46306	2.38094	0.0017215	0.0525421	NA	NA	NA	NA	NA	NA	NA	NA
GENE.evgHyS_ScswcV5_4264.g19450.t1~~evgHyS_ScswcV5_4264.g19450.t1.p1	-5.43829	1.73654	0.00173813	0.0529564	evgHyS_ScswcV5_4264.g19450.t1.p1	PREDICTED: neurogenic locus notch homolog protein 2-like isoform X1 [Hydra vulgaris]	0	Sushi, nidogen and EGF like domains 1	NA	calcium ion binding	Notch signaling pathway	receptor complex
GENE.evgMSTRG.125616.1~~evgMSTRG.125616.1.p2	-4.21067	1.34636	0.00176335	0.0536305	evgMSTRG.125616.1.p2	hypothetical protein G647_01391 [Cladophialophora carrionii CBS 160.54]	4.3	NA	NA	NA	NA	NA
GENE.evgMSTRG.111729.1~~evgMSTRG.111729.1.p1	-3.03873	0.972207	0.00177443	0.0537788	evgMSTRG.111729.1.p1	PREDICTED: trifunctional enzyme subunit alpha, mitochondrial isoform X2 [Hydra vulgaris]	0	Hydroxyacyl-CoA dehydrogenase trifunctional multienzyme complex subunit alpha b	HADHA	enoyl-CoA hydratase activity	fatty acid beta-oxidation	mitochondrial fatty acid beta-oxidation multienzyme complex
GENE.evgHyS_ScswcV5_3574.g15572.t1~~evgHyS_ScswcV5_3574.g15572.t1.p1	-3.18168	1.01848	0.00178443	0.0539876	evgHyS_ScswcV5_3574.g15572.t1.p1	PREDICTED: protein LCHN-like [Hydra vulgaris]	8.48e-141	NA	NA	NA	NA	NA
GENE.evgtrinLocDN22400c2g1t13~~evgtrinLocDN22400c2g1t13.p1	-5.49047	1.75902	0.00180046	0.0542832	evgtrinLocDN22400c2g1t13.p1	protein kinase [Melittangium boletus]	1.1	NA	NA	NA	NA	NA
GENE.evgtrinLocDN691c0g1t16~~evgtrinLocDN691c0g1t16.p1	-3.49824	1.12076	0.00180046	0.0542832	evgtrinLocDN691c0g1t16.p1	PREDICTED: cystathionine gamma-lyase-like [Hydra vulgaris]	0	Cystathionine gamma-lyase inhibitor	CTH	pyridoxal phosphate binding	transsulfuration	cytoplasm
GENE.evgHyS_ScswcV5_1783.g7308.t1~~evgHyS_ScswcV5_1783.g7308.t1.p1	-2.54027	0.81512	0.00183052	0.054903	evgHyS_ScswcV5_1783.g7308.t1.p1	PREDICTED: alpha-(1,6)-fucosyltransferase-like [Hydra vulgaris]	8.72e-81	Cysteine rich repeat-containing domain protein	NA	extracellular matrix structural constituent	extracellular matrix organization	collagen trimer
GENE.evgtrinLocDN14000c0g1t15~~evgtrinLocDN14000c0g1t15.p1	-5.71149	1.83385	0.00184269	0.0551726	evgtrinLocDN14000c0g1t15.p1	nematogalectin-related [Aurelia aurita]	3.33e-93	Macrophage receptor MARCO	NA	extracellular matrix structural constituent	extracellular matrix organization	collagen trimer
GENE.evgMSTRG.12690.1~~evgMSTRG.12690.1.p1	-3.47345	1.11614	0.00185812	0.0555387	evgMSTRG.12690.1.p1	PREDICTED: A disintegrin and metalloproteinase with thrombospondin motifs 6-like [Hydra vulgaris]	0	NA	NA	NA	NA	NA
GENE.evgHyS_ScswcV5_4509.g21470.t1~~evgHyS_ScswcV5_4509.g21470.t1.p1	-5.23677	1.68348	0.00186658	0.0556955	NA	NA	NA	NA	NA	NA	NA	NA
GENE.evgtrinLocDN99862c0g1t3~~evgtrinLocDN99862c0g1t3.p1	-7.71003	2.47961	0.00187488	0.0558471	evgtrinLocDN99862c0g1t3.p1	hypothetical protein [Ahniella affigens]	6.6	NA	NA	NA	NA	NA
GENE.evgHyS_ScswcV5_1325.g4766.t1~~evgHyS_ScswcV5_1325.g4766.t1.p1	-6.86396	2.20952	0.00189296	0.0561923	evgHyS_ScswcV5_1325.g4766.t1.p1	PREDICTED: C-type mannose receptor 2-like, partial [Hydra vulgaris]	1.46e-134	NA	NA	NA	NA	NA
GENE.evgMSTRG.106061.1~~evgMSTRG.106061.1.p1	-5.13468	1.65998	0.00197999	0.0579816	evgMSTRG.106061.1.p1	transposase IS66 family protein [Escherichia coli 2875000]	5.1	NA	NA	NA	NA	NA
GENE.evgHyS_ScswcV5_4509.g21431.t1~~evgHyS_ScswcV5_4509.g21431.t1.p1	-3.24703	1.05004	0.00198618	0.0580648	evgHyS_ScswcV5_4509.g21431.t1.p1	PREDICTED: A disintegrin and metalloproteinase with thrombospondin motifs 6-like [Hydra vulgaris]	0	A disintegrin and metalloproteinase with thrombospondin motifs	NA	metalloendopeptidase activity	integrin-mediated signaling pathway	extracellular matrix
GENE.evgMSTRG.100317.1~~evgMSTRG.100317.1.p2	-4.06362	1.31606	0.00201698	0.058866	evgMSTRG.100317.1.p2	hypothetical protein [Thermoanaerobacter wiegelii]	1.7	NA	NA	NA	NA	NA
GENE.evgtrinLocDN90045c0g1t2~~evgtrinLocDN90045c0g1t2.p1	-7.66744	2.48568	0.00203795	0.0591789	evgtrinLocDN90045c0g1t2.p1	serine hydroxymethyltransferase [Blastococcus saxobsidens]	0.79	NA	NA	NA	NA	NA
GENE.evgHyS_ScswcV5_3906.g17278.t1~~evgHyS_ScswcV5_3906.g17278.t1.p1	-4.99427	1.62134	0.00206762	0.0598783	evgHyS_ScswcV5_3906.g17278.t1.p1	sorting nexin-22 [Castor canadensis]	2.9	NA	NA	NA	NA	NA
GENE.evgtrinLocDN33059c0g1t42~~evgtrinLocDN33059c0g1t42.p1	-5.3719	1.74721	0.00210811	0.0609103	evgtrinLocDN33059c0g1t42.p1	probable G-protein coupled receptor No9 [Acanthaster planci]	4.4e-05	NA	NA	NA	NA	NA
GENE.evgtrinLocDN62822c0g1t6~~evgtrinLocDN62822c0g1t6.p1	-4.30204	1.40394	0.00218206	0.0626294	evgtrinLocDN62822c0g1t6.p1	PREDICTED: chitotriosidase-1-like [Hydra vulgaris]	6.34e-54	Glycoside hydrolase (Fragment)	NA	chitin binding	chitin metabolic process	extracellular region
GENE.evgHyS_ScswcV5_4270.g20116.t1~~evgHyS_ScswcV5_4270.g20116.t1.p1	-5.36772	1.75293	0.00219754	0.0629695	evgHyS_ScswcV5_4270.g20116.t1.p1	allorecognition 1, partial [Hydractinia symbiolongicarpus]	1.46e-14	NA	NA	NA	NA	NA
GENE.evgtrinLocDN164606c1g1t2~~evgtrinLocDN164606c1g1t2.p1	-7.79802	2.55009	0.00222866	0.0636936	evgtrinLocDN164606c1g1t2.p1	predicted protein [Nematostella vectensis]	6.67e-26	NA	NA	NA	NA	NA
GENE.evgtrinLocDN11604c1g1t1~~evgtrinLocDN11604c1g1t1.p1	-7.16559	2.34392	0.00223492	0.0636936	evgtrinLocDN11604c1g1t1.p1	hypothetical protein A4X06_g5519 [Tilletia controversa]	2.8	NA	NA	NA	NA	NA
GENE.evgtrinLocDN56068c0g1t9~~evgtrinLocDN56068c0g1t9.p1	-4.48307	1.4675	0.00225126	0.0638753	evgtrinLocDN56068c0g1t9.p1	PREDICTED: chitinase 3-like [Hydra vulgaris]	0	Glycoside hydrolase	NA	hydrolase activity, hydrolyzing O-glycosyl compounds	carbohydrate metabolic process	extracellular region
GENE.evgtrinLocDN42731c0g1t17~~evgtrinLocDN42731c0g1t17.p1	-5.88958	1.92875	0.00226134	0.0640567	evgtrinLocDN42731c0g1t17.p1	PREDICTED: GDP-fucose protein O-fucosyltransferase 2-like [Hydra vulgaris]	1.47e-82	Peptide-O-fucosyltransferase	POFUT2	transferase activity, transferring glycosyl groups	fucose metabolic process	Golgi apparatus
GENE.evgHyS_ScswcV5_1314.g4662.t1~~evgHyS_ScswcV5_1314.g4662.t1.p1	-2.79574	0.917967	0.00232237	0.0654643	evgHyS_ScswcV5_1314.g4662.t1.p1	PREDICTED: BAI1-associated protein 3-like isoform X1 [Hydra vulgaris]	0	NA	NA	NA	NA	NA
GENE.evgMSTRG.90236.1~~evgMSTRG.90236.1.p1	-7.37842	2.42481	0.00234322	0.0659449	evgMSTRG.90236.1.p1	uncharacterized protein LOC111129700 [Crassostrea virginica]	2.88e-56	NA	NA	NA	NA	NA
GENE.evgHyS_ScswcV5_457.g1621.t1~~evgHyS_ScswcV5_457.g1621.t1.p1	-3.74811	1.23309	0.00236889	0.0661722	evgHyS_ScswcV5_457.g1621.t1.p1	adhesion G protein-coupled receptor L3-like [Ciona intestinalis]	5.14e-51	Adhesion G protein-coupled receptor E3	NA	G protein-coupled receptor activity	cell surface receptor signaling pathway	integral component of membrane
GENE.evgHyS_ScswcV5_3298.g13309.t1~~evgHyS_ScswcV5_3298.g13309.t1.p1	-5.00163	1.64727	0.00239491	0.0667494	evgHyS_ScswcV5_3298.g13309.t1.p1	PREDICTED: transmembrane prolyl 4-hydroxylase-like [Hydra vulgaris]	0	Transmembrane prolyl 4-hydroxylase	P4HTM	L-ascorbic acid binding	peptidyl-proline hydroxylation to 4-hydroxy-L-proline	endoplasmic reticulum
GENE.evgHyS_ScswcV5_17.g77.t1~~evgHyS_ScswcV5_17.g77.t1.p1	-2.18317	0.719202	0.00240098	0.0668112	evgHyS_ScswcV5_17.g77.t1.p1	PREDICTED: fibroblast growth factor receptor 2-like [Acropora digitifera]	4.85e-101	NA	NA	NA	NA	NA
GENE.evgMSTRG.99930.1~~evgMSTRG.99930.1.p1	-5.43294	1.79296	0.00244435	0.0673691	evgMSTRG.99930.1.p1	PREDICTED: uncharacterized protein LOC100202994 [Hydra vulgaris]	4.93e-168	Tyrosine kinase receptor Cad96Ca	NA	protein tyrosine kinase activity	peptidyl-tyrosine phosphorylation	cytosol
GENE.evgtrinLocDN19201c0g1t10~~evgtrinLocDN19201c0g1t10.p1	-2.825	0.932666	0.002454	0.0674642	evgtrinLocDN19201c0g1t10.p1	hypothetical protein KGM_215940 [Danaus plexippus plexippus]	1.4e-53	Peptidylprolyl isomerase (Fragment)	NA	peptidyl-prolyl cis-trans isomerase activity	protein peptidyl-prolyl isomerization	integral component of membrane
GENE.evgMSTRG.34892.1~~evgMSTRG.34892.1.p1	-4.60205	1.51999	0.00246439	0.0674642	NA	NA	NA	NA	NA	NA	NA	NA
GENE.evgHyS_ScswcV5_66.g408.t1~~evgHyS_ScswcV5_66.g408.t1.p1	-5.70541	1.88444	0.00246473	0.0674642	evgHyS_ScswcV5_66.g408.t1.p1	Serine/threonine-protein kinase 31 [Stylophora pistillata]	2.24e-69	Serine/threonine-protein kinase 31	NA	protein kinase activity	protein phosphorylation	acrosomal vesicle
GENE.evgMSTRG.95582.1~~evgMSTRG.95582.1.p1	-4.07116	1.34537	0.00247762	0.0675346	evgMSTRG.95582.1.p1	PREDICTED: uncharacterized protein LOC100212329 [Hydra vulgaris]	7.98e-18	Coiled-coil domain-containing protein 95	INO80E	protein binding	chromatin remodeling	Ino80 complex
GENE.evgMSTRG.132982.1~~evgMSTRG.132982.1.p1	-2.75191	0.909594	0.00248281	0.0675555	evgMSTRG.132982.1.p1	PREDICTED: uncharacterized protein LOC100199718 isoform X1 [Hydra vulgaris]	0	Rho GTPase-activating protein 20	NA	GTPase activator activity	signal transduction	NA
GENE.evgtrinLocDN13849c0g1t6~~evgtrinLocDN13849c0g1t6.p1	-4.44372	1.4703	0.00250839	0.0680523	evgtrinLocDN13849c0g1t6.p1	PREDICTED: probable cyclin-dependent serine/threonine-protein kinase DDB_G0292550 isoform X2 [Hydra vulgaris]	1.27e-42	NA	NA	NA	NA	NA
GENE.evgMSTRG.128088.1~~evgMSTRG.128088.1.p1	-4.85176	1.60851	0.00255869	0.0693085	evgMSTRG.128088.1.p1	uncharacterized protein LOC110233262 [Exaiptasia pallida]	0	NA	NA	NA	NA	NA
GENE.evgMSTRG.114036.1~~evgMSTRG.114036.1.p1	-6.96251	2.30948	0.00257183	0.0695007	evgMSTRG.114036.1.p1	PREDICTED: adenylate kinase 8-like [Hydra vulgaris]	7.79e-155	Adenylate kinase 8	AK8	adenylate kinase activity	nucleoside monophosphate phosphorylation	sperm flagellum
GENE.evgtrinLocDN1868c2g1t1~~evgtrinLocDN1868c2g1t1.p1	-6.53367	2.16858	0.00258787	0.0697719	evgtrinLocDN1868c2g1t1.p1	Pogo transposable element with KRAB domain [Stylophora pistillata]	1.56e-19	NA	NA	NA	NA	NA
GENE.evgHyS_ScswcV5_4418.g21124.t1~~evgHyS_ScswcV5_4418.g21124.t1.p1	-2.18589	0.726028	0.00260599	0.0700848	evgHyS_ScswcV5_4418.g21124.t1.p1	PREDICTED: uncharacterized protein LOC101238783 [Hydra vulgaris]	0	NA	NA	NA	NA	NA
GENE.evgMSTRG.118750.2~~evgMSTRG.118750.2.p1	-2.86786	0.953471	0.00263137	0.0706152	evgMSTRG.118750.2.p1	PREDICTED: uncharacterized protein LOC105845880 isoform X1 [Hydra vulgaris]	8.52e-104	Erythrocyte carbonic anhydrase	NA	carbonate dehydratase activity	peptidyl-tyrosine dephosphorylation	anchored component of membrane
GENE.evgMSTRG.130541.1~~evgMSTRG.130541.1.p1	-4.4869	1.493	0.00265325	0.0710925	evgMSTRG.130541.1.p1	RNA-directed DNA polymerase from mobile element jockey [Stylophora pistillata]	1.12e-128	Tick transposon	POL	NA	NA	integral component of membrane
GENE.evgMSTRG.57820.1~~evgMSTRG.57820.1.p1	-6.19087	2.0608	0.00266358	0.0711493	evgMSTRG.57820.1.p1	hypothetical protein [Spirosoma pollinicola]	9.1	NA	NA	NA	NA	NA
GENE.evgHyS_ScswcV5_3186.g12552.t1~~evgHyS_ScswcV5_3186.g12552.t1.p1	-6.3523	2.11815	0.00270879	0.0716939	evgHyS_ScswcV5_3186.g12552.t1.p1	hypothetical protein DAPPUDRAFT_219145 [Daphnia pulex]	6.54e-51	NA	NA	NA	NA	NA
GENE.evgHyS_ScswcV5_3470.g14938.t1~~evgHyS_ScswcV5_3470.g14938.t1.p1	-4.06321	1.35504	0.0027123	0.0716939	evgHyS_ScswcV5_3470.g14938.t1.p1	PREDICTED: potassium voltage-gated channel subfamily H member 1-like isoform X2 [Hydra vulgaris]	3.65e-179	Potassium voltage-gated channel subfamily H member 1	KCNH1	voltage-gated potassium channel activity	regulation of ion transmembrane transport	integral component of plasma membrane
GENE.evgtrinLocDN172782c0g1t1~~evgtrinLocDN172782c0g1t1.p1	-3.60741	1.20396	0.00273286	0.0720729	NA	NA	NA	NA	NA	NA	NA	NA
GENE.evgMSTRG.121875.2~~evgMSTRG.121875.2.p1	-2.14327	0.715486	0.00273948	0.0720729	evgMSTRG.121875.2.p1	PREDICTED: uncharacterized protein LOC100210912 [Hydra vulgaris]	2.22e-76	LOW QUALITY PROTEIN: X-box-binding protein 1	XBP1	DNA-binding transcription factor activity	regulation of transcription, DNA-templated	integral component of endoplasmic reticulum membrane
GENE.evgMSTRG.16750.1~~evgMSTRG.16750.1.p1	-3.52883	1.17868	0.00275454	0.0720729	evgMSTRG.16750.1.p1	PREDICTED: midasin [Hydra vulgaris]	3.92e-36	NA	NA	NA	NA	NA
GENE.evgMSTRG.83755.1~~evgMSTRG.83755.1.p1	-7.41264	2.47596	0.00275485	0.0720729	evgMSTRG.83755.1.p1	predicted protein [Nematostella vectensis]	3.44e-43	NA	NA	NA	NA	NA
GENE.evgHyS_ScswcV5_4270.g19565.t1~~evgHyS_ScswcV5_4270.g19565.t1.p1	-2.618	0.874511	0.00275636	0.0720729	evgHyS_ScswcV5_4270.g19565.t1.p1	notch-b [Hydractinia echinata]	0	NA	NA	NA	NA	NA
GENE.evgtrinLocDN19058c0g1t5~~evgtrinLocDN19058c0g1t5.p1	-3.36883	1.12566	0.0027646	0.0721793	evgtrinLocDN19058c0g1t5.p1	PREDICTED: nuclear receptor subfamily 2 group E member 1-like isoform X1 [Hydra vulgaris]	3.12e-73	Nuclear receptor	NA	steroid hormone receptor activity	steroid hormone mediated signaling pathway	nucleus
GENE.evgtrinLocDN16691c0g1t13~~evgtrinLocDN16691c0g1t13.p1	-2.121	0.709415	0.00279174	0.072669	evgtrinLocDN16691c0g1t13.p1	PREDICTED: asparagine synthetase [glutamine-hydrolyzing]-like [Hydra vulgaris]	0	Asparagine synthetase glutamine-hydrolyzing	ASNS	asparagine synthase (glutamine-hydrolyzing) activity	asparagine biosynthetic process	cytosol
GENE.evgHyS_ScswcV5_1767.g6926.t1~~evgHyS_ScswcV5_1767.g6926.t1.p1	-6.61757	2.21487	0.00281001	0.0729257	NA	NA	NA	NA	NA	NA	NA	NA
GENE.evgMSTRG.13192.1~~evgMSTRG.13192.1.p1	-3.17561	1.06495	0.00286439	0.0737705	evgMSTRG.13192.1.p1	Piso0_003097 [Millerozyma farinosa CBS 7064]	1.4	NA	NA	NA	NA	NA
GENE.evgHyS_ScswcV5_2402.g8935.t1~~evgHyS_ScswcV5_2402.g8935.t1.p1	-4.76096	1.59682	0.0028681	0.0737705	evgHyS_ScswcV5_2402.g8935.t1.p1	coiled-coil domain-containing protein 150-like [Pocillopora damicornis]	7.47e-32	NA	NA	NA	NA	NA
GENE.evgtrinLocDN40084c0g1t6~~evgtrinLocDN40084c0g1t6.p1	-5.84988	1.96405	0.00289687	0.0739975	evgtrinLocDN40084c0g1t6.p1	PREDICTED: uncharacterized protein LOC754317 [Strongylocentrotus purpuratus]	0.02	NA	NA	NA	NA	NA
GENE.evgtrinLocDN54406c0g1t1~~evgtrinLocDN54406c0g1t1.p2	-6.90752	2.32045	0.00291268	0.0742422	evgtrinLocDN54406c0g1t1.p2	hypothetical protein GUITHDRAFT_158012 [Guillardia theta CCMP2712]	8e-17	NA	NA	NA	NA	NA
GENE.evgMSTRG.55236.1~~evgMSTRG.55236.1.p1	-3.881	1.30453	0.00292973	0.0743627	evgMSTRG.55236.1.p1	hypothetical protein Y032_0038g3590 [Ancylostoma ceylanicum]	0.000568	Collagen triple helix repeat (20 copies)	NA	extracellular matrix structural constituent	extracellular matrix organization	collagen trimer
GENE.evgHyS_ScswcV5_1611.g5381.t1~~evgHyS_ScswcV5_1611.g5381.t1.p1	-4.76573	1.60341	0.00295627	0.0747084	evgHyS_ScswcV5_1611.g5381.t1.p1	PREDICTED: coiled-coil domain-containing protein 18-like [Hydra vulgaris]	6.68e-59	NA	NA	NA	NA	NA
GENE.evgMSTRG.31188.1~~evgMSTRG.31188.1.p1	-7.89078	2.65582	0.00296709	0.0747638	evgMSTRG.31188.1.p1	uncharacterized protein LOC111324887 [Stylophora pistillata]	2.77e-43	NA	NA	NA	NA	NA
GENE.evgHyS_ScswcV5_704.g3199.t1~~evgHyS_ScswcV5_704.g3199.t1.p1	-2.3226	0.782094	0.00298071	0.0748958	evgHyS_ScswcV5_704.g3199.t1.p1	PREDICTED: kinesin-like protein KIF28P [Hydra vulgaris]	0	Kinesin motor domain containing protein	NA	microtubule motor activity	microtubule-based movement	microtubule
GENE.evgtrinLocDN17525c0g3t1~~evgtrinLocDN17525c0g3t1.p1	-7.57877	2.55351	0.00299759	0.0748958	evgtrinLocDN17525c0g3t1.p1	predicted protein [Nematostella vectensis]	2.14e-31	NA	NA	NA	NA	NA
GENE.evgHyS_ScswcV5_644.g2175.t1~~evgHyS_ScswcV5_644.g2175.t1.p1	-2.99263	1.00833	0.00299825	0.0748958	evgHyS_ScswcV5_644.g2175.t1.p1	PREDICTED: chondroitin sulfate glucuronyltransferase-like [Hydra vulgaris]	0	Hexosyltransferase	NA	acetylgalactosaminyltransferase activity	mRNA 5'-splice site recognition	Golgi cisterna membrane
GENE.evgtrinLocDN67160c1g2t7~~evgtrinLocDN67160c1g2t7.p1	-7.92025	2.66917	0.00300418	0.0749359	evgtrinLocDN67160c1g2t7.p1	Clan CA, family C19, ubiquitin hydrolase-like cysteine peptidase [Trichomonas vaginalis G3]	3.4	NA	NA	NA	NA	NA
GENE.evgtrinLocDN88146c0g1t21~~evgtrinLocDN88146c0g1t21.p1	-4.84639	1.63433	0.00302316	0.075193	evgtrinLocDN88146c0g1t21.p1	hypothetical protein GOBAR_DD23235 [Gossypium barbadense]	1.3	NA	NA	NA	NA	NA
GENE.evgtrinLocDN39070c0g1t12~~evgtrinLocDN39070c0g1t12.p1	-7.74463	2.61272	0.00303469	0.0752638	evgtrinLocDN39070c0g1t12.p1	acyltransferase domain-containing protein [Bacillus velezensis]	0.58	NA	NA	NA	NA	NA
GENE.evgHyS_ScswcV5_2333.g8518.t1~~evgHyS_ScswcV5_2333.g8518.t1.p1	-4.16096	1.40418	0.00304403	0.0752704	evgHyS_ScswcV5_2333.g8518.t1.p1	apoptosis regulator BAX-like [Hydra vulgaris]	1.72e-42	Apoptosis regulator BAX	NA	protein homodimerization activity	regulation of apoptotic process	mitochondrial outer membrane
GENE.evgtrinLocDN9051c0g1t3~~evgtrinLocDN9051c0g1t3.p1	-4.54097	1.53259	0.00304717	0.0752704	evgtrinLocDN9051c0g1t3.p1	Retrovirus-related Pol polyprotein LINE-1 [Zea mays]	1.32e-05	NA	NA	NA	NA	NA
GENE.evgMSTRG.72785.1~~evgMSTRG.72785.1.p1	-2.45591	0.829022	0.00305232	0.0752704	evgMSTRG.72785.1.p1	hypothetical protein AC249_AIPGENE26930 [Exaiptasia pallida]	1.85e-24	NA	NA	NA	NA	NA
GENE.evgHyS_ScswcV5_3574.g15373.t1~~evgHyS_ScswcV5_3574.g15373.t1.p1	-7.14276	2.41206	0.00306374	0.075349	evgHyS_ScswcV5_3574.g15373.t1.p1	ficolin-2-like [Pocillopora damicornis]	2.59e-39	Fibrinogen C domain-containing protein 1	NA	receptor tyrosine kinase binding	angiogenesis	extracellular region part
GENE.evgHyS_ScswcV5_3493.g15061.t1~~evgHyS_ScswcV5_3493.g15061.t1.p1	-2.62799	0.887467	0.00306421	0.075349	evgHyS_ScswcV5_3493.g15061.t1.p1	PREDICTED: uncharacterized protein LOC100203132 [Hydra vulgaris]	0	NA	NA	NA	NA	NA
GENE.evgMSTRG.127668.1~~evgMSTRG.127668.1.p1	-4.9528	1.67576	0.00312105	0.0766326	evgMSTRG.127668.1.p1	PREDICTED: vesicular GABA transporter-like [Hydra vulgaris]	4.21e-100	NA	NA	NA	NA	NA
GENE.evgMSTRG.74630.1~~evgMSTRG.74630.1.p1	-3.70123	1.25354	0.00315092	0.0767982	evgMSTRG.74630.1.p1	uncharacterized protein LOC111333545, partial [Stylophora pistillata]	4.28e-11	NA	NA	NA	NA	NA
GENE.evgHyS_ScswcV5_3470.g14869.t1~~evgHyS_ScswcV5_3470.g14869.t1.p1	-5.99599	2.0313	0.00315932	0.0768161	evgHyS_ScswcV5_3470.g14869.t1.p1	PREDICTED: mitochondrial import inner membrane translocase subunit TIM50-like [Hydra vulgaris]	9.39e-120	Mitochondrial import inner membrane translocase subunit TIM50	NA	mitochondrion targeting sequence binding	protein transport	TIM23 mitochondrial import inner membrane translocase complex
GENE.evgtrinLocDN86200c0g1t3~~evgtrinLocDN86200c0g1t3.p1	-4.85412	1.6462	0.00319143	0.0772835	evgtrinLocDN86200c0g1t3.p1	murein biosynthesis integral membrane protein MurJ [Clostridium sp. DL-VIII]	9	NA	NA	NA	NA	NA
GENE.evgMSTRG.64096.1~~evgMSTRG.64096.1.p1	-6.05613	2.05388	0.00319191	0.0772835	evgMSTRG.64096.1.p1	PREDICTED: alpha-1A adrenergic receptor-like [Acropora digitifera]	0.003	NA	NA	NA	NA	NA
GENE.evgHyS_ScswcV5_2067.g8152.t1~~evgHyS_ScswcV5_2067.g8152.t1.p1	-4.85509	1.64846	0.00322722	0.0778917	evgHyS_ScswcV5_2067.g8152.t1.p1	PREDICTED: uncharacterized protein LOC100208683 [Hydra vulgaris]	1.93e-27	NA	NA	NA	NA	NA
GENE.evgHyS_ScswcV5_3298.g13367.t1~~evgHyS_ScswcV5_3298.g13367.t1.p1	-6.27127	2.13102	0.00325205	0.0783022	evgHyS_ScswcV5_3298.g13367.t1.p1	PREDICTED: uncharacterized protein LOC100210142 [Hydra vulgaris]	6.46e-93	NA	NA	NA	NA	NA
GENE.evgtrinLocDN11720c0g1t23~~evgtrinLocDN11720c0g1t23.p1	-2.69971	0.917749	0.00326453	0.0784155	evgtrinLocDN11720c0g1t23.p1	PREDICTED: vesicular glutamate transporter 2-like isoform X1 [Hydra vulgaris]	0	Vesicular glutamate transporter 1	NA	sialic acid transmembrane transporter activity	transmembrane transport	integral component of membrane
GENE.evgtrinLocDN30924c0g1t8~~evgtrinLocDN30924c0g1t8.p1	-4.71502	1.6031	0.00326962	0.0784155	evgtrinLocDN30924c0g1t8.p1	hypothetical protein [Bradyrhizobium paxllaeri]	4.5	NA	NA	NA	NA	NA
GENE.evgHyS_ScswcV5_2333.g8546.t1~~evgHyS_ScswcV5_2333.g8546.t1.p1	-1.96059	0.667182	0.00329686	0.0789425	evgHyS_ScswcV5_2333.g8546.t1.p1	PREDICTED: methylosome protein 50-like [Hydra vulgaris]	1.51e-83	NA	NA	NA	NA	NA
GENE.evgtrinLocDN397c1g1t15~~evgtrinLocDN397c1g1t15.p2	-4.16791	1.42167	0.00337103	0.0806071	evgtrinLocDN397c1g1t15.p2	uncharacterized protein LOC110458535 [Mizuhopecten yessoensis]	1.98e-15	NA	NA	NA	NA	NA
GENE.evgHyS_ScswcV5_4509.g21503.t1~~evgHyS_ScswcV5_4509.g21503.t1.p1	-2.73944	0.935062	0.00339297	0.08102	evgHyS_ScswcV5_4509.g21503.t1.p1	PREDICTED: procollagen galactosyltransferase 2-like isoform X1 [Hydra vulgaris]	0	LOW QUALITY PROTEIN: procollagen galactosyltransferase 2	COLGALT2	procollagen galactosyltransferase activity	positive regulation of collagen fibril organization	endoplasmic reticulum lumen
GENE.evgHyS_ScswcV5_2333.g8695.t1~~evgHyS_ScswcV5_2333.g8695.t1.p1	-2.31275	0.789933	0.00341396	0.0813966	evgHyS_ScswcV5_2333.g8695.t1.p1	PREDICTED: RNA-binding protein MEX3B-like [Hydra vulgaris]	0	RING finger and KH domain-containing protein 3 (Fragment)	MEX3B	RNA binding	protein autophosphorylation	nucleoplasm
GENE.evgHyS_ScswcV5_3094.g12343.t1~~evgHyS_ScswcV5_3094.g12343.t1.p1	-6.20541	2.12179	0.00344883	0.0818208	evgHyS_ScswcV5_3094.g12343.t1.p1	unnamed protein product [Soboliphyme baturini]	0.000418	NA	NA	NA	NA	NA
GENE.evgHyS_ScswcV5_2988.g11849.t1~~evgHyS_ScswcV5_2988.g11849.t1.p1	-6.07615	2.07767	0.00345011	0.0818208	evgHyS_ScswcV5_2988.g11849.t1.p1	PREDICTED: uncharacterized protein LOC101236484 [Hydra vulgaris]	2.99e-47	NA	NA	NA	NA	NA
GENE.evgHyS_ScswcV5_3339.g14177.t1~~evgHyS_ScswcV5_3339.g14177.t1.p1	-3.98667	1.36351	0.00345764	0.0818874	evgHyS_ScswcV5_3339.g14177.t1.p1	PREDICTED: glutamine-rich protein 2-like [Hydra vulgaris]	1.1e-112	Glutamine-rich protein 2	NA	NA	NA	NA
GENE.evgtrinLocDN87385c0g1t5~~evgtrinLocDN87385c0g1t5.p1	-3.10468	1.0626	0.00348052	0.0822464	evgtrinLocDN87385c0g1t5.p1	melanocyte-stimulating hormone receptor-like [Orbicella faveolata]	0.000524	NA	NA	NA	NA	NA
GENE.evgHyS_ScswcV5_3896.g16944.t1~~evgHyS_ScswcV5_3896.g16944.t1.p1	-2.33764	0.800119	0.00348228	0.0822464	evgHyS_ScswcV5_3896.g16944.t1.p1	cilia- and flagella-associated protein 58-like [Pocillopora damicornis]	0	cilia- and flagella-associated protein 58	CFAP58	protein binding	cilium-dependent cell motility	motile cilium
GENE.evgHyS_ScswcV5_3305.g13700.t1~~evgHyS_ScswcV5_3305.g13700.t1.p1	-4.49746	1.54095	0.00351579	0.0826997	evgHyS_ScswcV5_3305.g13700.t1.p1	PREDICTED: uncharacterized protein LOC100200141 [Hydra vulgaris]	3.01e-62	NA	NA	NA	NA	NA
GENE.evgMSTRG.103307.2~~evgMSTRG.103307.2.p1	-4.15509	1.42411	0.00352647	0.0828387	evgMSTRG.103307.2.p1	uncharacterized protein LOC110249773 [Exaiptasia pallida]	3.31e-10	NA	NA	NA	NA	NA
GENE.evgHyS_ScswcV5_2988.g11858.t1~~evgHyS_ScswcV5_2988.g11858.t1.p1	-2.70834	0.928889	0.00354916	0.0830897	evgHyS_ScswcV5_2988.g11858.t1.p1	PREDICTED: SCO-spondin-like, partial [Hydra vulgaris]	0	NA	NA	NA	NA	NA
GENE.evgtrinLocDN4049c0g1t8~~evgtrinLocDN4049c0g1t8.p1	-6.68882	2.29445	0.00355435	0.0830897	evgtrinLocDN4049c0g1t8.p1	hypothetical protein pdam_00008605 [Pocillopora damicornis]	0.000326	NA	NA	NA	NA	NA
GENE.evgMSTRG.37124.1~~evgMSTRG.37124.1.p1	-2.63566	0.904157	0.00355633	0.0830897	evgMSTRG.37124.1.p1	MULTISPECIES: orotate phosphoribosyltransferase [Sporomusaceae]	5.2	NA	NA	NA	NA	NA
GENE.evgMSTRG.25073.2~~evgMSTRG.25073.2.p2	-2.95707	1.01504	0.00357696	0.0834591	NA	NA	NA	NA	NA	NA	NA	NA
GENE.evgHyS_ScswcV5_364.g1235.t1~~evgHyS_ScswcV5_364.g1235.t1.p1	-2.08519	0.715896	0.00358319	0.0834921	evgHyS_ScswcV5_364.g1235.t1.p1	PREDICTED: membralin-like [Hydra vulgaris]	1.07e-121	Transmembrane protein 259	NA	NA	positive regulation of ERAD pathway	endoplasmic reticulum
GENE.evgMSTRG.35358.6~~evgMSTRG.35358.6.p1	-3.32838	1.14304	0.0035926	0.0835991	evgMSTRG.35358.6.p1	astacin 4 [Hydractinia echinata]	0.005	LPXTG-motif cell wall-anchored protein	NA	serine-type endopeptidase inhibitor activity	negative regulation of endopeptidase activity	extracellular region
GENE.evgtrinLocDN3140c0g1t7~~evgtrinLocDN3140c0g1t7.p1	-4.68457	1.61196	0.00365934	0.0847134	NA	NA	NA	NA	NA	NA	NA	NA
GENE.evgtrinLocDN12753c0g1t9~~evgtrinLocDN12753c0g1t9.p1	-6.43621	2.21475	0.00366003	0.0847134	evgtrinLocDN12753c0g1t9.p1	PREDICTED: uncharacterized protein LOC108775361 [Cyphomyrmex costatus]	4.05e-27	NA	NA	NA	NA	NA
GENE.evgHyS_ScswcV5_2402.g8811.t1~~evgHyS_ScswcV5_2402.g8811.t1.p1	-5.10205	1.75843	0.00371399	0.08583	evgHyS_ScswcV5_2402.g8811.t1.p1	PREDICTED: zinc metalloproteinase nas-15-like [Hydra vulgaris]	5.34e-62	Metalloendopeptidase	NA	metalloendopeptidase activity	proteolysis	membrane
GENE.evgMSTRG.37142.1~~evgMSTRG.37142.1.p4	-5.75755	1.98533	0.00373097	0.0860107	NA	NA	NA	NA	NA	NA	NA	NA
GENE.evgHyS_ScswcV5_807.g3533.t1~~evgHyS_ScswcV5_807.g3533.t1.p1	-2.62502	0.905802	0.00375537	0.0864085	evgHyS_ScswcV5_807.g3533.t1.p1	WD repeat-containing protein on Y chromosome-like [Pocillopora damicornis]	0	LOW QUALITY PROTEIN: WD repeat-containing protein 49	NA	calcium ion binding	proteasome-mediated ubiquitin-dependent protein catabolic process	Cul4-RING E3 ubiquitin ligase complex
GENE.evgHyS_ScswcV5_2604.g10849.t1~~evgHyS_ScswcV5_2604.g10849.t1.p1	-3.58458	1.2384	0.00379739	0.0869787	evgHyS_ScswcV5_2604.g10849.t1.p1	PREDICTED: ribonuclease H2 subunit A-like [Hydra vulgaris]	2.43e-136	Ribonuclease	RNASEH2A	RNA-DNA hybrid ribonuclease activity	RNA phosphodiester bond hydrolysis, endonucleolytic	ribonuclease H2 complex
GENE.evgtrinLocDN2793c0g1t5~~evgtrinLocDN2793c0g1t5.p1	-4.31857	1.49201	0.00379804	0.0869787	evgtrinLocDN2793c0g1t5.p1	PREDICTED: uncharacterized protein LOC109476717 [Branchiostoma belcheri]	2.48e-89	NA	NA	NA	NA	NA
GENE.evgHyS_ScswcV5_1750.g6845.t1~~evgHyS_ScswcV5_1750.g6845.t1.p1	-3.98645	1.37787	0.00381331	0.0870981	evgHyS_ScswcV5_1750.g6845.t1.p1	PREDICTED: protein NATD1-like [Acropora digitifera]	5.4e-22	N-acetyltransferase	NA	MAP-kinase scaffold activity	positive regulation of MAPK cascade	NA
GENE.evgMSTRG.112819.2~~evgMSTRG.112819.2.p1	-2.71449	0.939483	0.00386038	0.0879417	evgMSTRG.112819.2.p1	PREDICTED: probable glutamate receptor [Hydra vulgaris]	6.58e-44	NA	NA	NA	NA	NA
GENE.evgHyS_ScswcV5_4255.g19237.t1~~evgHyS_ScswcV5_4255.g19237.t1.p1	-6.73254	2.33086	0.00387167	0.0880831	evgHyS_ScswcV5_4255.g19237.t1.p1	PREDICTED: zinc metalloproteinase nas-8-like [Hydra vulgaris]	6.52e-77	Metalloendopeptidase	NA	metalloendopeptidase activity	proteolysis	cortical granule
GENE.evgHyS_ScswcV5_1733.g5630.t1~~evgHyS_ScswcV5_1733.g5630.t1.p1	-3.16541	1.09791	0.00393763	0.0892324	evgHyS_ScswcV5_1733.g5630.t1.p1	PREDICTED: uncharacterized protein LOC105850989 [Hydra vulgaris]	1.78e-86	Potassium voltage-gated channel subfamily KQT	NA	potassium channel activity	potassium ion transmembrane transport	voltage-gated potassium channel complex
GENE.evgtrinLocDN213c7g1t2~~evgtrinLocDN213c7g1t2.p1	-7.8415	2.72107	0.00395449	0.0894032	evgtrinLocDN213c7g1t2.p1	putative aminotransferase C660.12c [Stylophora pistillata]	4.46e-12	NA	NA	NA	NA	NA
GENE.evgtrinLocDN69350c0g1t6~~evgtrinLocDN69350c0g1t6.p1	-8.05046	2.79375	0.00395673	0.0894032	evgtrinLocDN69350c0g1t6.p1	PREDICTED: tigger transposable element-derived protein 4-like [Hydra vulgaris]	2.69e-11	NA	NA	NA	NA	NA
GENE.evgtrinLocDN29645c0g1t3~~evgtrinLocDN29645c0g1t3.p1	-2.70571	0.939392	0.0039733	0.0894032	evgtrinLocDN29645c0g1t3.p1	PREDICTED: uncharacterized protein LOC100214568 isoform X1 [Hydra vulgaris]	3.14e-12	NA	NA	NA	NA	NA
GENE.evgMSTRG.74866.10~~evgMSTRG.74866.10.p1	-3.55405	1.23519	0.00401043	0.0899416	evgMSTRG.74866.10.p1	hypothetical protein [Megasphaera sp. DISK 18]	5.7	NA	NA	NA	NA	NA
GENE.evgMSTRG.107488.2~~evgMSTRG.107488.2.p1	-1.99168	0.692497	0.0040264	0.0901582	evgMSTRG.107488.2.p1	PREDICTED: very long-chain specific acyl-CoA dehydrogenase, mitochondrial-like [Hydra vulgaris]	0	Very long-chain specific acyl-CoA dehydrogenaseserine-threonine	ACADVL	acyl-CoA dehydrogenase activity	oxidation-reduction process	mitochondrial nucleoid
GENE.evgMSTRG.129627.3~~evgMSTRG.129627.3.p2	-4.08041	1.4192	0.00403827	0.0902158	NA	NA	NA	NA	NA	NA	NA	NA
GENE.evgtrinLocDN2983c17g1t3~~evgtrinLocDN2983c17g1t3.p1	-6.13206	2.13324	0.00404636	0.0902801	evgtrinLocDN2983c17g1t3.p1	roundabout -like protein [Labeo rohita]	0.004	NA	NA	NA	NA	NA
GENE.evgHyS_ScswcV5_3671.g15883.t1~~evgHyS_ScswcV5_3671.g15883.t1.p1	-2.5125	0.87433	0.0040578	0.090419	evgHyS_ScswcV5_3671.g15883.t1.p1	PREDICTED: uncharacterized protein PFB0765w-like [Hydra vulgaris]	1.22e-128	NA	NA	NA	NA	NA
GENE.evgHyS_ScswcV5_1000.g4085.t1~~evgHyS_ScswcV5_1000.g4085.t1.p1	-4.68066	1.62963	0.004076	0.0905917	NA	NA	NA	NA	NA	NA	NA	NA
GENE.evgMSTRG.100655.1~~evgMSTRG.100655.1.p1	-6.40486	2.23039	0.00408365	0.0906456	evgMSTRG.100655.1.p1	Uncharacterized protein 259R [Exaiptasia pallida]	3.96e-12	NA	NA	NA	NA	NA
GENE.evgtrinLocDN3118c0g1t3~~evgtrinLocDN3118c0g1t3.p1	-5.99138	2.08722	0.00409823	0.0906698	evgtrinLocDN3118c0g1t3.p1	DUF4302 domain-containing protein [Pedobacter caeni]	1.4	NA	NA	NA	NA	NA
GENE.evgHyS_ScswcV5_664.g2846.t1~~evgHyS_ScswcV5_664.g2846.t1.p1	-4.28073	1.49171	0.00410886	0.0906698	evgHyS_ScswcV5_664.g2846.t1.p1	PREDICTED: metabotropic glutamate receptor 3-like [Hydra vulgaris]	0	Metabotropic glutamate receptor 7	NA	G protein-coupled receptor activity	G protein-coupled receptor signaling pathway	plasma membrane
GENE.evgMSTRG.106541.1~~evgMSTRG.106541.1.p1	-5.34817	1.86369	0.00410916	0.0906698	evgMSTRG.106541.1.p1	hypothetical protein BSL78_18773 [Apostichopus japonicus]	7.31e-10	NA	NA	NA	NA	NA
GENE.evgtrinLocDN5163c0g3t1~~evgtrinLocDN5163c0g3t1.p1	-6.9098	2.408	0.00411089	0.0906698	evgtrinLocDN5163c0g3t1.p1	putative RNA-directed DNA polymerase from transposon X-element [Stylophora pistillata]	1.24e-05	NA	NA	NA	NA	NA
GENE.evgtrinLocDN3922c2g2t1~~evgtrinLocDN3922c2g2t1.p1	-7.13332	2.48657	0.00412115	0.0907806	evgtrinLocDN3922c2g2t1.p1	uncharacterized protein LOC113234977, partial [Hyposmocoma kahamanoa]	1.12e-06	NA	NA	NA	NA	NA
GENE.evgtrinLocDN500c3g1t3~~evgtrinLocDN500c3g1t3.p1	-5.82106	2.03037	0.00414393	0.0909882	evgtrinLocDN500c3g1t3.p1	PREDICTED: uncharacterized protein C1orf158 homolog [Hydra vulgaris]	8.1e-55	NA	NA	NA	NA	NA
GENE.evgHyS_ScswcV5_1786.g7383.t1~~evgHyS_ScswcV5_1786.g7383.t1.p1	-7.38531	2.57614	0.00414633	0.0909882	evgHyS_ScswcV5_1786.g7383.t1.p1	keratin-associated protein 10-6-like [Oryzias latipes]	2.55e-79	NA	NA	NA	NA	NA
GENE.evgHyS_ScswcV5_4270.g19748.t1~~evgHyS_ScswcV5_4270.g19748.t1.p1	-1.83479	0.640296	0.00416312	0.0911657	evgHyS_ScswcV5_4270.g19748.t1.p1	PREDICTED: helicase SKI2W-like [Hydra vulgaris]	0	Superkiller viralicidic activity 2 (S. cerevisiae homolog)-like	SKIV2L	RNA helicase activity	RNA catabolic process	Ski complex
GENE.evgtrinLocDN2589c2g1t3~~evgtrinLocDN2589c2g1t3.p2	-8.19143	2.86168	0.00420379	0.0919003	evgtrinLocDN2589c2g1t3.p2	PREDICTED: disintegrin and metalloproteinase domain-containing protein 23 [Charadrius vociferus]	0.22	NA	NA	NA	NA	NA
GENE.evgMSTRG.101038.1~~evgMSTRG.101038.1.p1	-4.83689	1.69087	0.00422863	0.0923268	NA	NA	NA	NA	NA	NA	NA	NA
GENE.evgMSTRG.140262.1~~evgMSTRG.140262.1.p1	-2.94761	1.03276	0.00431566	0.0936374	NA	NA	NA	NA	NA	NA	NA	NA
GENE.evgMSTRG.46378.1~~evgMSTRG.46378.1.p1	-3.5359	1.24236	0.00442549	0.0953047	evgMSTRG.46378.1.p1	PREDICTED: protein YIPF5-like [Hydra vulgaris]	1.08e-104	Yip1 domain family, member 5	NA	ATPase activity, coupled to transmembrane movement of substances	regulation of ER to Golgi vesicle-mediated transport	endoplasmic reticulum exit site
GENE.evgHyS_ScswcV5_4261.g19270.t1~~evgHyS_ScswcV5_4261.g19270.t1.p1	-5.76574	2.02983	0.00450432	0.0962144	evgHyS_ScswcV5_4261.g19270.t1.p1	uncharacterized protein LOC111336518 [Stylophora pistillata]	2.53e-49	NA	NA	NA	NA	NA
GENE.evgtrinLocDN19801c1g1t3~~evgtrinLocDN19801c1g1t3.p1	-7.53753	2.65431	0.00451507	0.0962144	NA	NA	NA	NA	NA	NA	NA	NA
GENE.evgtrinLocDN36576c0g1t3~~evgtrinLocDN36576c0g1t3.p1	-3.93858	1.38699	0.00451606	0.0962144	evgtrinLocDN36576c0g1t3.p1	hypothetical protein BRAFLDRAFT_222067 [Branchiostoma floridae]	6.96e-17	NA	NA	NA	NA	NA
GENE.evgtrinLocDN216589c0g1t4~~evgtrinLocDN216589c0g1t4.p1	-5.33987	1.88053	0.00451768	0.0962144	evgtrinLocDN216589c0g1t4.p1	hypothetical protein B9Z55_007417 [Caenorhabditis nigoni]	2.6	NA	NA	NA	NA	NA
GENE.evgHyS_ScswcV5_3204.g12778.t1~~evgHyS_ScswcV5_3204.g12778.t1.p1	-3.38912	1.19431	0.00454381	0.0965864	evgHyS_ScswcV5_3204.g12778.t1.p1	PREDICTED: uncharacterized protein LOC100201886 [Hydra vulgaris]	2.86e-05	NA	NA	NA	NA	NA
GENE.evgtrinLocDN58794c0g1t1~~evgtrinLocDN58794c0g1t1.p1	-5.15111	1.8154	0.00454755	0.0965864	NA	NA	NA	NA	NA	NA	NA	NA
GENE.evgtrinLocDN60077c2g1t6~~evgtrinLocDN60077c2g1t6.p1	-4.68868	1.6526	0.00455186	0.0965864	NA	NA	NA	NA	NA	NA	NA	NA
GENE.evgtrinLocDN45777c0g1t7~~evgtrinLocDN45777c0g1t7.p1	-4.39667	1.55194	0.0046112	0.0977219	evgtrinLocDN45777c0g1t7.p1	uncharacterized protein LOC113682553 [Pocillopora damicornis]	6.58e-13	NA	NA	NA	NA	NA
GENE.evgtrinLocDN7006c3g1t13~~evgtrinLocDN7006c3g1t13.p1	-5.02129	1.77266	0.00461665	0.0977219	NA	NA	NA	NA	NA	NA	NA	NA
GENE.evgMSTRG.114975.1~~evgMSTRG.114975.1.p1	-4.37298	1.54454	0.00463654	0.0979039	evgMSTRG.114975.1.p1	hypothetical protein DMN91_012736 [Ooceraea biroi]	7.09e-55	NA	NA	NA	NA	NA
GENE.evgtrinLocDN32116c0g1t11~~evgtrinLocDN32116c0g1t11.p1	-3.07995	1.08818	0.0046493	0.0980537	evgtrinLocDN32116c0g1t11.p1	PREDICTED: sodium/potassium-transporting ATPase subunit beta-1-interacting protein 1-like [Priapulus caudatus]	5.61e-36	NA	NA	NA	NA	NA
GENE.evgMSTRG.100170.1~~evgMSTRG.100170.1.p1	-4.62257	1.63545	0.00470632	0.0986024	evgMSTRG.100170.1.p1	hypothetical protein DRJ11_08380 [Candidatus Aminicenantes bacterium]	0.11	NA	NA	NA	NA	NA
GENE.evgHyS_ScswcV5_3309.g13851.t1~~evgHyS_ScswcV5_3309.g13851.t1.p1	-2.65489	0.939365	0.00470944	0.0986024	evgHyS_ScswcV5_3309.g13851.t1.p1	PREDICTED: heat shock cognate 71 kDa protein isoform X1 [Branchiostoma belcheri]	0	Molecular chaperone DnaK	NA	ATP binding	cellular response to topologically incorrect protein	cytosol
GENE.evgMSTRG.115650.2~~evgMSTRG.115650.2.p1	-4.74859	1.68084	0.00472608	0.0988314	evgMSTRG.115650.2.p1	interferon-induced protein 44 isoform X3 [Larimichthys crocea]	0.017	NA	NA	NA	NA	NA
GENE.evgtrinLocDN27663c0g2t3~~evgtrinLocDN27663c0g2t3.p1	-2.76205	0.977806	0.00473182	0.0988323	evgtrinLocDN27663c0g2t3.p1	PREDICTED: 2-hydroxyacylsphingosine 1-beta-galactosyltransferase [Drosophila rhopaloa]	3.1	NA	NA	NA	NA	NA
GENE.evgtrinLocDN30175c0g1t7~~evgtrinLocDN30175c0g1t7.p1	-4.0884	1.44797	0.00474957	0.0989944	evgtrinLocDN30175c0g1t7.p1	PREDICTED: solute carrier family 25 member 36-like [Acropora digitifera]	1.36e-84	Mitochondrial pyrimidine nucleotide transporter	NA	transmembrane transporter activity	transmembrane transport	integral component of membrane
GENE.evgMSTRG.129665.1~~evgMSTRG.129665.1.p1	-4.54483	1.61002	0.00476005	0.0989944	evgMSTRG.129665.1.p1	DUF3427 domain-containing protein [Lactobacillus delbrueckii]	4	NA	NA	NA	NA	NA
GENE.evgHyS_ScswcV5_50.g289.t1~~evgHyS_ScswcV5_50.g289.t1.p1	-4.16268	1.47493	0.00476827	0.0989974	evgHyS_ScswcV5_50.g289.t1.p1	PREDICTED: tRNA-splicing endonuclease subunit Sen34-like [Hydra vulgaris]	1.13e-73	TSEN34 tRNA splicing endonuclease subunit	NA	tRNA-intron endonuclease activity	tRNA-type intron splice site recognition and cleavage	tRNA-intron endonuclease complex
GENE.evgtrinLocDN17040c0g1t12~~evgtrinLocDN17040c0g1t12.p1	-4.09082	1.44994	0.00478193	0.0991622	evgtrinLocDN17040c0g1t12.p1	PREDICTED: peptidase M20 domain-containing protein 2-like, partial [Hydra vulgaris]	1.92e-24	Peptidase M20 domain-containing protein 2 (Fragment)	NA	hydrolase activity	folic acid catabolic process	cytoplasm
GENE.evgtrinLocDN4010c0g3t1~~evgtrinLocDN4010c0g3t1.p1	-6.87562	2.43819	0.00480286	0.0992754	evgtrinLocDN4010c0g3t1.p1	P2X purinoceptor 7-like [Crassostrea virginica]	1.13e-10	NA	NA	NA	NA	NA
GENE.evgMSTRG.37062.1~~evgMSTRG.37062.1.p1	-5.66453	2.0088	0.00480457	0.0992754	evgMSTRG.37062.1.p1	PREDICTED: uncharacterized protein LOC105850389, partial [Hydra vulgaris]	5.31e-108	Transposable element P transposase	NA	transposase activity	transposition, DNA-mediated	integral component of membrane
GENE.evgtrinLocDN191618c0g1t3~~evgtrinLocDN191618c0g1t3.p1	-7.41699	2.63285	0.00484595	0.0997473	evgtrinLocDN191618c0g1t3.p1	hypothetical protein LOTGIDRAFT_235246 [Lottia gigantea]	2.5	NA	NA	NA	NA	NA
GENE.evgMSTRG.63931.1~~evgMSTRG.63931.1.p1	-2.89476	1.02772	0.00485215	0.0997473	evgMSTRG.63931.1.p1	uncharacterized protein LOC110249774 [Exaiptasia pallida]	4.15e-59	NA	NA	NA	NA	NA
GENE.evgHyS_ScswcV5_4681.g21761.t1~~evgHyS_ScswcV5_4681.g21761.t1.p1	-3.60635	1.28076	0.00486588	0.0998283	evgHyS_ScswcV5_4681.g21761.t1.p1	PREDICTED: probable glutamate receptor [Hydra vulgaris]	4.16e-56	NA	NA	NA	NA	NA
GENE.evgHyS_ScswcV5_3574.g15520.t1~~evgHyS_ScswcV5_3574.g15520.t1.p1	-2.3705	0.842012	0.00487355	0.0998604	evgHyS_ScswcV5_3574.g15520.t1.p1	PREDICTED: uncharacterized protein LOC100202739 isoform X1 [Hydra vulgaris]	0	NA	NA	NA	NA	NA
GENE.evgHyS_ScswcV5_664.g2844.t1~~evgHyS_ScswcV5_664.g2844.t1.p1	-5.18737	1.84362	0.00489767	0.0998604	evgHyS_ScswcV5_664.g2844.t1.p1	predicted protein [Nematostella vectensis]	2.84e-121	Animal haem peroxidase	NA	peroxidase activity	response to oxidative stress	extracellular region
GENE.evgHyS_ScswcV5_3470.g14705.t1~~evgHyS_ScswcV5_3470.g14705.t1.p1	-3.00762	1.06899	0.00490014	0.0998604	evgHyS_ScswcV5_3470.g14705.t1.p1	PREDICTED: kinesin-related protein 5-like isoform X1 [Hydra vulgaris]	0	NA	NA	NA	NA	NA

## Sheet: RFamide-high vs RFamide low
gene_id	log2_fc	log2_FC_SE	pval	padj	transcript_id	best_BLAST_hit	eval	pannzer_description	pannzer_gene_name	molecular_function	biological_processes	cellular_component
GENE.evgHyS_ScswcV5_3339.g14094.t1~~evgHyS_ScswcV5_3339.g14094.t1.p1	6.84855	0.847164	6.26283e-16	9.87022e-13	evgHyS_ScswcV5_3339.g14094.t1.p1	uncharacterized protein LOC111337906 [Stylophora pistillata]	1.65e-68	NA	NA	NA	NA	NA
GENE.evgtrinLocDN402277c0g2t1~~evgtrinLocDN402277c0g2t1.p1	20.5464	2.6085	3.36091e-15	4.4819e-12	evgtrinLocDN402277c0g2t1.p1	type III glutamate--ammonia ligase [Marinomonas posidonica]	0.81	NA	NA	NA	NA	NA
GENE.evgMSTRG.80322.1~~evgMSTRG.80322.1.p1	6.67146	0.881709	3.83394e-14	4.15407e-11	evgMSTRG.80322.1.p1	precursor protein for RFamide [Hydractinia echinata]	0	Precursor protein for RFamide	NA	NA	neuropeptide signaling pathway	extracellular region
GENE.evgHyS_ScswcV5_2090.g8170.t1~~evgHyS_ScswcV5_2090.g8170.t1.p1	5.01809	0.716979	2.57911e-12	1.94397e-09	evgHyS_ScswcV5_2090.g8170.t1.p1	PREDICTED: uncharacterized protein LOC101240655 [Hydra vulgaris]	1.5e-52	NA	NA	NA	NA	NA
GENE.evgtrinLocDN114279c0g2t2~~evgtrinLocDN114279c0g2t2.p1	19.4525	3.02076	1.19788e-10	6.69887e-08	evgtrinLocDN114279c0g2t2.p1	valine--tRNA ligase [Desulfobulbus japonicus]	2.3	NA	NA	NA	NA	NA
GENE.evgHyS_ScswcV5_2556.g10204.t1~~evgHyS_ScswcV5_2556.g10204.t1.p1	6.74473	1.05541	1.65241e-10	8.95193e-08	evgHyS_ScswcV5_2556.g10204.t1.p1	PREDICTED: probable G-protein coupled receptor 133 [Hydra vulgaris]	2.68e-92	Adhesion G protein-coupled receptor D1	NA	G protein-coupled receptor activity	cell surface receptor signaling pathway	integral component of membrane
GENE.evgHyS_ScswcV5_4079.g18964.t1~~evgHyS_ScswcV5_4079.g18964.t1.p1	7.12187	1.14549	5.05781e-10	2.65703e-07	NA	NA	NA	NA	NA	NA	NA	NA
GENE.evgMSTRG.115235.1~~evgMSTRG.115235.1.p1	8.64916	1.39799	6.13827e-10	3.10521e-07	evgMSTRG.115235.1.p1	PREDICTED: uncharacterized protein LOC105846211 [Hydra vulgaris]	3.15e-16	NA	NA	NA	NA	NA
GENE.evgtrinLocDN67314c0g1t6~~evgtrinLocDN67314c0g1t6.p1	9.33286	1.54031	1.36891e-09	6.2451e-07	evgtrinLocDN67314c0g1t6.p1	PREDICTED: uncharacterized protein LOC105844209 [Hydra vulgaris]	2.8e-116	NA	NA	NA	NA	NA
GENE.evgMSTRG.52940.1~~evgMSTRG.52940.1.p1	9.25432	1.53645	1.71022e-09	7.4121e-07	evgMSTRG.52940.1.p1	predicted protein [Nematostella vectensis]	5.91e-140	gamma-aminobutyric acid receptor subunit beta	NA	extracellular ligand-gated ion channel activity	ion transmembrane transport	plasma membrane
GENE.evgHyS_ScswcV5_644.g2524.t1~~evgHyS_ScswcV5_644.g2524.t1.p1	8.40659	1.4002	1.92689e-09	8.14745e-07	evgHyS_ScswcV5_644.g2524.t1.p1	uncharacterized protein LOC110252849 isoform X2 [Exaiptasia pallida]	2.68e-104	Potassium voltage-gated channel subfamily F member 1	NA	potassium channel activity	potassium ion transmembrane transport	voltage-gated potassium channel complex
GENE.evgMSTRG.74177.1~~evgMSTRG.74177.1.p1	4.86211	0.812541	2.17937e-09	8.9956e-07	evgMSTRG.74177.1.p1	PREDICTED: uncharacterized protein LOC100210512 [Hydra vulgaris]	5.07e-103	NA	NA	NA	NA	NA
GENE.evgHyS_ScswcV5_3906.g17299.t1~~evgHyS_ScswcV5_3906.g17299.t1.p1	7.61449	1.27531	2.36242e-09	9.34412e-07	evgHyS_ScswcV5_3906.g17299.t1.p1	dynein heavy chain 7, axonemal [Trichogramma pretiosum]	9.5	NA	NA	NA	NA	NA
GENE.evgHyS_ScswcV5_2427.g9038.t1~~evgHyS_ScswcV5_2427.g9038.t1.p1	6.30298	1.05576	2.37161e-09	9.34412e-07	evgHyS_ScswcV5_2427.g9038.t1.p1	PREDICTED: bone morphogenetic protein 1-like [Hydra vulgaris]	3.06e-168	Metalloendopeptidase	NA	metalloendopeptidase activity	proteolysis	membrane
GENE.evgMSTRG.129006.1~~evgMSTRG.129006.1.p1	5.29115	0.888985	2.65041e-09	1.02106e-06	evgMSTRG.129006.1.p1	uncharacterized protein LOC113685877 [Pocillopora damicornis]	3.43e-68	NA	NA	NA	NA	NA
GENE.evgtrinLocDN10097c0g1t13~~evgtrinLocDN10097c0g1t13.p1	5.58058	0.970717	8.98149e-09	2.88339e-06	NA	NA	NA	NA	NA	NA	NA	NA
GENE.evgHyS_ScswcV5_4079.g18879.t1~~evgHyS_ScswcV5_4079.g18879.t1.p1	7.52588	1.31531	1.05428e-08	3.32308e-06	evgHyS_ScswcV5_4079.g18879.t1.p1	PREDICTED: G-protein coupled receptor 64-like [Hydra vulgaris]	2.83e-68	NA	NA	NA	NA	NA
GENE.evgHyS_ScswcV5_3153.g12478.t1~~evgHyS_ScswcV5_3153.g12478.t1.p1	8.45874	1.50264	1.81011e-08	5.41035e-06	evgHyS_ScswcV5_3153.g12478.t1.p1	PREDICTED: alpha-1A adrenergic receptor-like [Hydra vulgaris]	6.91e-78	C-X3-C motif chemokine receptor 1	CX3CR1	C-X3-C chemokine receptor activity	chemokine-mediated signaling pathway	cell surface
GENE.evgHyS_ScswcV5_3781.g16265.t1~~evgHyS_ScswcV5_3781.g16265.t1.p1	4.42292	0.786839	1.89723e-08	5.57465e-06	evgHyS_ScswcV5_3781.g16265.t1.p1	PREDICTED: endothelin-converting enzyme 1-like [Hydra vulgaris]	0	Endothelin-converting enzyme 1	NA	DNA-binding transcription factor activity, RNA polymerase II-specific	eye development	nucleus
GENE.evgHyS_ScswcV5_2604.g10836.t1~~evgHyS_ScswcV5_2604.g10836.t1.p1	7.48954	1.34351	2.48078e-08	7.1678e-06	evgHyS_ScswcV5_2604.g10836.t1.p1	PREDICTED: uncharacterized protein LOC100209150 [Hydra vulgaris]	1.67e-51	NA	NA	NA	NA	NA
GENE.evgHyS_ScswcV5_2988.g11753.t1~~evgHyS_ScswcV5_2988.g11753.t1.p1	5.4718	0.989554	3.21031e-08	9.00981e-06	evgHyS_ScswcV5_2988.g11753.t1.p1	GS homeobox 2, partial [Puma concolor]	1.46e-07	NA	NA	NA	NA	NA
GENE.evgMSTRG.22465.1~~evgMSTRG.22465.1.p1	3.7726	0.69266	5.13597e-08	1.32891e-05	evgMSTRG.22465.1.p1	PREDICTED: forkhead box protein C1-like [Hydra vulgaris]	3.04e-42	Fork head domain	NA	sequence-specific DNA binding	regulation of transcription, DNA-templated	nucleus
GENE.evgtrinLocDN101306c0g1t4~~evgtrinLocDN101306c0g1t4.p1	9.70279	1.7994	6.95893e-08	1.74841e-05	evgtrinLocDN101306c0g1t4.p1	nuclear pore complex protein Nup98-Nup96 [Bicyclus anynana]	6.4	NA	NA	NA	NA	NA
GENE.evgMSTRG.94253.1~~evgMSTRG.94253.1.p1	4.43126	0.828737	8.94256e-08	2.10369e-05	evgMSTRG.94253.1.p1	intraflagellar transport protein 88 homolog [Exaiptasia pallida]	0	intraflagellar transport protein 88 homolog	IFT88	kinesin binding	inner ear receptor cell stereocilium organization	cilium
GENE.evgtrinLocDN8746c0g1t1~~evgtrinLocDN8746c0g1t1.p1	6.41862	1.21086	1.15255e-07	2.62903e-05	evgtrinLocDN8746c0g1t1.p1	PREDICTED: zinc metalloproteinase nas-4-like [Hydra vulgaris]	2.93e-95	Metalloendopeptidase	NA	metalloendopeptidase activity	proteolysis	meprin A complex
GENE.evgMSTRG.18812.1~~evgMSTRG.18812.1.p1	7.32712	1.39918	1.63457e-07	3.68012e-05	evgMSTRG.18812.1.p1	unnamed protein product [Albugo candida]	3.9	NA	NA	NA	NA	NA
GENE.evgHyS_ScswcV5_3574.g15383.t1~~evgHyS_ScswcV5_3574.g15383.t1.p1	6.39151	1.2431	2.7244e-07	5.81917e-05	evgHyS_ScswcV5_3574.g15383.t1.p1	Contactin-associated protein 2-like [Hydra vulgaris]	0	Contactin-associated protein 2-like	NA	calcium ion binding	regulation of grooming behavior	integral component of presynaptic membrane
GENE.evgtrinLocDN134727c0g1t1~~evgtrinLocDN134727c0g1t1.p1	8.99428	1.75071	2.78415e-07	5.81917e-05	evgtrinLocDN134727c0g1t1.p1	uncharacterized protein LOC110440049 [Danio rerio]	3e-07	NA	NA	NA	NA	NA
GENE.evgMSTRG.126847.1~~evgMSTRG.126847.1.p1	6.4885	1.263	2.78606e-07	5.81917e-05	evgMSTRG.126847.1.p1	PREDICTED: cGMP-dependent protein kinase 1-like [Hydra vulgaris]	0	cGMP-dependent protein kinase	NA	cGMP-dependent protein kinase activity	protein phosphorylation	endomembrane system
GENE.evgMSTRG.108109.2~~evgMSTRG.108109.2.p1	9.57266	1.87579	3.3383e-07	6.65739e-05	evgMSTRG.108109.2.p1	PREDICTED: uncharacterized protein LOC105844209 [Hydra vulgaris]	5.03e-96	NA	NA	NA	NA	NA
GENE.evgtrinLocDN9992c0g1t5~~evgtrinLocDN9992c0g1t5.p1	8.05934	1.57997	3.37938e-07	6.65739e-05	evgtrinLocDN9992c0g1t5.p1	neuropeptide FF receptor 2-like isoform X2 [Stylophora pistillata]	1.48e-21	Neuropeptide FF receptor 2	NA	G protein-coupled receptor activity	G protein-coupled receptor signaling pathway	integral component of membrane
GENE.evgMSTRG.92182.1~~evgMSTRG.92182.1.p1	5.14075	1.00925	3.51244e-07	6.84177e-05	evgMSTRG.92182.1.p1	PREDICTED: endothelin-converting enzyme 1-like [Hydra vulgaris]	0	phosphate-regulating neutral endopeptidase	NA	metalloendopeptidase activity	proteolysis	integral component of membrane
GENE.evgHyS_ScswcV5_4509.g21373.t1~~evgHyS_ScswcV5_4509.g21373.t1.p1	9.10985	1.79198	3.70194e-07	7.07904e-05	evgHyS_ScswcV5_4509.g21373.t1.p1	PREDICTED: folylpolyglutamate synthase, mitochondrial-like [Hydra vulgaris]	7.44e-174	Folylpolyglutamate synthase	FPGS	tetrahydrofolylpolyglutamate synthase activity	tetrahydrofolylpolyglutamate biosynthetic process	mitochondrial matrix
GENE.evgtrinLocDN87968c0g1t9~~evgtrinLocDN87968c0g1t9.p1	6.30924	1.24186	3.76477e-07	7.09413e-05	NA	NA	NA	NA	NA	NA	NA	NA
GENE.evgHyS_ScswcV5_2649.g10933.t1~~evgHyS_ScswcV5_2649.g10933.t1.p1	3.54028	0.699164	4.11444e-07	7.66966e-05	evgHyS_ScswcV5_2649.g10933.t1.p1	PREDICTED: receptor-type tyrosine-protein phosphatase delta [Hydra vulgaris]	0	Receptor-type tyrosine-protein phosphatase delta	NA	protein tyrosine phosphatase activity	peptidyl-tyrosine dephosphorylation	integral component of membrane
GENE.evgHyS_ScswcV5_2427.g9197.t1~~evgHyS_ScswcV5_2427.g9197.t1.p1	7.28656	1.44179	4.33058e-07	7.98669e-05	evgHyS_ScswcV5_2427.g9197.t1.p1	hypothetical protein [Pseudodiaptomus poplesia]	0.013	NA	NA	NA	NA	NA
GENE.evgHyS_ScswcV5_3094.g12276.t1~~evgHyS_ScswcV5_3094.g12276.t1.p1	4.71695	0.9394	5.13384e-07	9.14375e-05	evgHyS_ScswcV5_3094.g12276.t1.p1	IgGFc-binding protein [Oryzias latipes]	2.17e-69	NA	NA	NA	NA	NA
GENE.evgHyS_ScswcV5_3470.g14708.t1~~evgHyS_ScswcV5_3470.g14708.t1.p1	7.28666	1.45155	5.16894e-07	9.14375e-05	evgHyS_ScswcV5_3470.g14708.t1.p1	PREDICTED: uncharacterized protein LOC105847626 [Hydra vulgaris]	7.75e-50	NA	NA	NA	NA	NA
GENE.evgHyS_ScswcV5_4196.g19105.t1~~evgHyS_ScswcV5_4196.g19105.t1.p1	6.44588	1.29772	6.7968e-07	0.00011902	evgHyS_ScswcV5_4196.g19105.t1.p1	PREDICTED: leucine-rich repeats and immunoglobulin-like domains protein 1 [Acropora digitifera]	3.39e-83	NA	NA	NA	NA	NA
GENE.evgtrinLocDN78043c0g1t4~~evgtrinLocDN78043c0g1t4.p1	4.13579	0.85055	1.15919e-06	0.000191387	evgtrinLocDN78043c0g1t4.p1	preprotein translocase subunit SecE [Candidatus Marinimicrobia bacterium]	2.3	NA	NA	NA	NA	NA
GENE.evgHyS_ScswcV5_3887.g16851.t1~~evgHyS_ScswcV5_3887.g16851.t1.p1	4.10518	0.86025	1.82332e-06	0.000282224	evgHyS_ScswcV5_3887.g16851.t1.p1	PREDICTED: atrial natriuretic peptide receptor 1-like isoform X1 [Hydra vulgaris]	0	Retinal guanylyl cyclase 2 GC-F	NA	guanylate cyclase activity	cGMP biosynthetic process	integral component of membrane
GENE.evgHyS_ScswcV5_2427.g9231.t1~~evgHyS_ScswcV5_2427.g9231.t1.p1	6.0649	1.28938	2.55445e-06	0.000385077	evgHyS_ScswcV5_2427.g9231.t1.p1	cerebellar degeneration-related protein 2-like [Mizuhopecten yessoensis]	2.72e-05	NA	NA	NA	NA	NA
GENE.evgHyS_ScswcV5_366.g1423.t1~~evgHyS_ScswcV5_366.g1423.t1.p1	3.40095	0.724277	2.65768e-06	0.00039379	evgHyS_ScswcV5_366.g1423.t1.p1	matrix metalloproteinase-19-like isoform X1 [Orbicella faveolata]	0.06	NA	NA	NA	NA	NA
GENE.evgHyS_ScswcV5_98.g826.t1~~evgHyS_ScswcV5_98.g826.t1.p1	3.99311	0.852988	2.85036e-06	0.000415243	evgHyS_ScswcV5_98.g826.t1.p1	uncharacterized protein LOC111321936 isoform X2 [Stylophora pistillata]	1.67e-40	Amino acid ABC transporter substrate-binding protein, PAAT family	NA	voltage-gated potassium channel activity	potassium ion transmembrane transport	voltage-gated potassium channel complex
GENE.evgHyS_ScswcV5_4270.g19525.t1~~evgHyS_ScswcV5_4270.g19525.t1.p1	4.59175	0.994673	3.90572e-06	0.000533146	evgHyS_ScswcV5_4270.g19525.t1.p1	TRAP transporter small permease [Bradyrhizobium japonicum]	2	NA	NA	NA	NA	NA
GENE.evgtrinLocDN17608c0g1t13~~evgtrinLocDN17608c0g1t13.p1	5.99561	1.30114	4.06643e-06	0.000550747	evgtrinLocDN17608c0g1t13.p1	PREDICTED: calmodulin-alpha-like [Hydra vulgaris]	2.08e-65	calmodulin-A	NA	calcium ion binding	calcium-mediated signaling	central plaque of mitotic spindle pole body
GENE.evgHyS_ScswcV5_3574.g15559.t1~~evgHyS_ScswcV5_3574.g15559.t1.p1	7.7847	1.69352	4.29141e-06	0.000567907	evgHyS_ScswcV5_3574.g15559.t1.p1	PREDICTED: CKLF-like MARVEL transmembrane domain-containing protein 4 [Hydra vulgaris]	1.25e-23	NA	NA	NA	NA	NA
GENE.evgHyS_ScswcV5_364.g1292.t1~~evgHyS_ScswcV5_364.g1292.t1.p1	4.61791	1.0133	5.18163e-06	0.000655684	evgHyS_ScswcV5_364.g1292.t1.p1	uncharacterized protein LOC111136263 isoform X1 [Crassostrea virginica]	5.29e-81	NA	NA	NA	NA	NA
GENE.evgMSTRG.120031.1~~evgMSTRG.120031.1.p1	5.55801	1.22325	5.5292e-06	0.000685316	evgMSTRG.120031.1.p1	hypothetical protein BRAFLDRAFT_92020 [Branchiostoma floridae]	1.43e-104	Poly (ADP-ribose) polymerase family, member 12a	LOC108264402	NAD+ ADP-ribosyltransferase activity	protein mono-ADP-ribosylation	nucleus
GENE.evgMSTRG.111654.3~~evgMSTRG.111654.3.p1	4.01404	0.888214	6.20649e-06	0.00076009	evgMSTRG.111654.3.p1	PREDICTED: hemicentin-1-like [Hydra vulgaris]	1.96e-100	NA	NA	NA	NA	NA
GENE.evgtrinLocDN44103c0g1t2~~evgtrinLocDN44103c0g1t2.p2	3.59093	0.796791	6.58331e-06	0.000792558	evgtrinLocDN44103c0g1t2.p2	actin/green fluorescent protein fusion protein [Cloning vector pHyVec1]	0	Soluble-modified red-shifted green fluorescent protein	NA	cysteine-type endopeptidase activity	bioluminescence	virion
GENE.evgtrinLocDN18733c2g2t1~~evgtrinLocDN18733c2g2t1.p1	5.28185	1.1858	8.41826e-06	0.000977747	evgtrinLocDN18733c2g2t1.p1	redox-regulated ATPase YchF [Candidatus Saccharibacteria bacterium RIFCSPHIGHO2_01_FULL_49_21]	0.17	NA	NA	NA	NA	NA
GENE.evgHyS_ScswcV5_2604.g10864.t1~~evgHyS_ScswcV5_2604.g10864.t1.p1	7.84348	1.76131	8.45997e-06	0.000977747	evgHyS_ScswcV5_2604.g10864.t1.p1	PREDICTED: developmentally-regulated GTP-binding protein 2 [Hydra vulgaris]	0	Developmentally-regulated GTP-binding protein 2	DRG2	GTP binding	cytoplasmic translation	nucleoplasm
GENE.evgHyS_ScswcV5_4270.g19676.t1~~evgHyS_ScswcV5_4270.g19676.t1.p1	5.125	1.15172	8.59233e-06	0.000979978	evgHyS_ScswcV5_4270.g19676.t1.p1	PREDICTED: progonadoliberin-1 [Pantholops hodgsonii]	1.2	NA	NA	NA	NA	NA
GENE.evgtrinLocDN21497c0g1t1~~evgtrinLocDN21497c0g1t1.p1	7.84681	1.77209	9.51072e-06	0.0010606	evgtrinLocDN21497c0g1t1.p1	Chain A, Calmodulin Mutant With A Two Residue Deletion In The Central Helix	5.14e-60	Calmoduline	NA	calcium ion binding	calcium-mediated signaling	spindle microtubule
GENE.evgHyS_ScswcV5_3882.g16768.t1~~evgHyS_ScswcV5_3882.g16768.t1.p1	8.43728	1.91167	1.01682e-05	0.00111567	evgHyS_ScswcV5_3882.g16768.t1.p1	radial spoke head 1 homolog [Orbicella faveolata]	3.21e-60	Membrance occupation and recognition nexus protein 1	RSPH1	structural constituent of muscle	histone lysine methylation	junctional membrane complex
GENE.evgHyS_ScswcV5_1734.g6126.t1~~evgHyS_ScswcV5_1734.g6126.t1.p1	3.30431	0.753716	1.16504e-05	0.00124674	evgHyS_ScswcV5_1734.g6126.t1.p1	LIM-domain protein prickle [Clytia hemisphaerica]	0	Prickle planar cell polarity protein 1	PRICKLE1	zinc ion binding	negative regulation of cardiac muscle cell myoblast differentiation	nuclear membrane
GENE.evgMSTRG.91731.1~~evgMSTRG.91731.1.p1	6.37184	1.45529	1.19559e-05	0.00126699	evgMSTRG.91731.1.p1	PREDICTED: uncharacterized protein LOC100198837 [Hydra vulgaris]	2.14e-27	NA	NA	NA	NA	NA
GENE.evgtrinLocDN37551c0g1t1~~evgtrinLocDN37551c0g1t1.p1	5.16323	1.1842	1.29996e-05	0.00136582	evgtrinLocDN37551c0g1t1.p1	PREDICTED: DNA-directed RNA polymerases I, II, and III subunit RPABC2-like [Hydra vulgaris]	1.27e-52	RNA polymerase II subunit F	POLR2F	DNA-directed 5'-3' RNA polymerase activity	transcription, DNA-templated	RNA polymerase II, core complex
GENE.evgHyS_ScswcV5_4051.g18374.t1~~evgHyS_ScswcV5_4051.g18374.t1.p1	4.34758	1.00013	1.38004e-05	0.00143259	evgHyS_ScswcV5_4051.g18374.t1.p1	potassium channel subfamily K member 9-like isoform X2 [Stylophora pistillata]	9.22e-19	NA	NA	NA	NA	NA
GENE.evgHyS_ScswcV5_3186.g12602.t1~~evgHyS_ScswcV5_3186.g12602.t1.p1	3.22928	0.743342	1.39736e-05	0.00144194	evgHyS_ScswcV5_3186.g12602.t1.p1	hypothetical protein GUITHDRAFT_121393 [Guillardia theta CCMP2712]	4.24e-62	NA	NA	NA	NA	NA
GENE.evgMSTRG.92184.1~~evgMSTRG.92184.1.p1	7.05122	1.63051	1.52852e-05	0.00155429	evgMSTRG.92184.1.p1	somatostatin receptor type 2-like [Pseudomyrmex gracilis]	3.2	NA	NA	NA	NA	NA
GENE.evgHyS_ScswcV5_4261.g19247.t1~~evgHyS_ScswcV5_4261.g19247.t1.p1	4.57473	1.05805	1.53422e-05	0.00155429	evgHyS_ScswcV5_4261.g19247.t1.p1	neuropeptides B/W receptor type 1-like [Carassius auratus]	3.44e-17	Galanin receptor type 2	GALR2	G protein-coupled receptor activity	G protein-coupled receptor signaling pathway	integral component of membrane
GENE.evgHyS_ScswcV5_17.g104.t1~~evgHyS_ScswcV5_17.g104.t1.p1	8.16589	1.89561	1.64899e-05	0.00164522	evgHyS_ScswcV5_17.g104.t1.p1	PREDICTED: histamine H2 receptor-like [Hydra vulgaris]	1.2e-76	NA	NA	NA	NA	NA
GENE.evgtrinLocDN26448c0g1t4~~evgtrinLocDN26448c0g1t4.p1	3.91836	0.909666	1.6513e-05	0.00164522	evgtrinLocDN26448c0g1t4.p1	PREDICTED: RNA-binding protein 40-like [Hydra vulgaris]	1.78e-168	RNA-binding region-containing protein 3	RNPC3	RNA binding	mRNA splicing, via spliceosome	U12-type spliceosomal complex
GENE.evgHyS_ScswcV5_2706.g11052.t1~~evgHyS_ScswcV5_2706.g11052.t1.p1	3.75889	0.878293	1.8709e-05	0.00181195	evgHyS_ScswcV5_2706.g11052.t1.p1	PREDICTED: nucleolar protein 56 [Hydra vulgaris]	0	Nucleolar protein 56like [Nasonia vitripennis]	NOP56	snoRNA binding	heart development	small nucleolar ribonucleoprotein complex
GENE.evgMSTRG.13900.3~~evgMSTRG.13900.3.p1	4.59677	1.0785	2.02444e-05	0.00192833	evgMSTRG.13900.3.p1	PREDICTED: uncharacterized protein LOC101238236 [Hydra vulgaris]	2.09e-07	NA	NA	NA	NA	NA
GENE.evgMSTRG.81285.1~~evgMSTRG.81285.1.p1	5.27483	1.24075	2.12522e-05	0.00201327	evgMSTRG.81285.1.p1	neuromedin-K receptor-like [Orbicella faveolata]	1.06e-33	NA	NA	NA	NA	NA
GENE.evgHyS_ScswcV5_2556.g10483.t1~~evgHyS_ScswcV5_2556.g10483.t1.p1	4.59609	1.08714	2.36117e-05	0.00222463	evgHyS_ScswcV5_2556.g10483.t1.p1	guanidinoacetate N-methyltransferase [Electrophorus electricus]	1.28e-123	Guanidinoacetate N-methyltransferase A	GAMT	guanidinoacetate N-methyltransferase activity	creatine biosynthetic process	nucleus
GENE.evgHyS_ScswcV5_3896.g17078.t1~~evgHyS_ScswcV5_3896.g17078.t1.p1	4.32983	1.02794	2.5294e-05	0.00234426	evgHyS_ScswcV5_3896.g17078.t1.p1	PREDICTED: uncharacterized protein LOC100207967 [Hydra vulgaris]	5.22e-103	NA	NA	NA	NA	NA
GENE.evgtrinLocDN164686c0g1t10~~evgtrinLocDN164686c0g1t10.p1	4.42862	1.05345	2.62327e-05	0.0024062	evgtrinLocDN164686c0g1t10.p1	hypothetical protein CERSUDRAFT_115253 [Gelatoporia subvermispora B]	1.8	NA	NA	NA	NA	NA
GENE.evgtrinLocDN2496c0g1t18~~evgtrinLocDN2496c0g1t18.p1	5.78064	1.37576	2.64839e-05	0.00241602	evgtrinLocDN2496c0g1t18.p1	PREDICTED: RNA exonuclease 4-like [Hydra vulgaris]	2.57e-77	RNA exonuclease	REXO4	3'-5' exonuclease activity	rRNA processing	nuclear speck
GENE.evgHyS_ScswcV5_190.g895.t1~~evgHyS_ScswcV5_190.g895.t1.p1	7.82688	1.86943	2.82953e-05	0.00251553	evgHyS_ScswcV5_190.g895.t1.p1	hypothetical protein pdam_00016360 [Pocillopora damicornis]	4.33e-89	voltage-dependent calcium channel subunit alpha-2/delta-3	CACNA2D3	voltage-gated calcium channel activity	calcium ion transmembrane transport	voltage-gated calcium channel complex
GENE.evgHyS_ScswcV5_1219.g4495.t1~~evgHyS_ScswcV5_1219.g4495.t1.p1	6.74998	1.61772	3.0125e-05	0.00262436	evgHyS_ScswcV5_1219.g4495.t1.p1	brachyury T-like protein HeBra [Hydractinia echinata]	0	T-box transcription factor T	TBXT	RNA polymerase II activating transcription factor binding	positive regulation of transcription from RNA polymerase II promoter involved in myocardial precursor cell differentiation	nuclear chromatin
GENE.evgHyS_ScswcV5_2988.g11943.t1~~evgHyS_ScswcV5_2988.g11943.t1.p1	5.25242	1.2609	3.10506e-05	0.00267699	evgHyS_ScswcV5_2988.g11943.t1.p1	PREDICTED: transmembrane emp24 domain-containing protein 7-like [Hydra vulgaris]	1.25e-105	Transmembrane emp24 domain-containing protein	NA	NA	NA	integral component of membrane
GENE.evgHyS_ScswcV5_3241.g13072.t1~~evgHyS_ScswcV5_3241.g13072.t1.p1	6.0417	1.45073	3.11924e-05	0.00267699	evgHyS_ScswcV5_3241.g13072.t1.p1	hypothetical protein LOTGIDRAFT_102422 [Lottia gigantea]	2.58e-36	NA	NA	NA	NA	NA
GENE.evgtrinLocDN5178c1g1t5~~evgtrinLocDN5178c1g1t5.p1	4.108	0.988988	3.2708e-05	0.00276598	evgtrinLocDN5178c1g1t5.p1	PREDICTED: uncharacterized protein LOC100210520, partial [Hydra vulgaris]	1.29e-134	NA	NA	NA	NA	NA
GENE.evgHyS_ScswcV5_2548.g10121.t1~~evgHyS_ScswcV5_2548.g10121.t1.p1	6.24807	1.50603	3.34378e-05	0.00280037	evgHyS_ScswcV5_2548.g10121.t1.p1	putative ammonium transporter 3 [Stylophora pistillata]	1.97e-171	Ammonium transporter	NA	ammonium transmembrane transporter activity	ammonium transmembrane transport	integral component of membrane
GENE.evgHyS_ScswcV5_3298.g13498.t1~~evgHyS_ScswcV5_3298.g13498.t1.p1	3.7833	0.913313	3.43703e-05	0.00286463	evgHyS_ScswcV5_3298.g13498.t1.p1	zinc metalloproteinase nas-14-like [Exaiptasia pallida]	0	Metalloendopeptidase	NA	metalloendopeptidase activity	molting cycle, collagen and cuticulin-based cuticle	membrane
GENE.evgtrinLocDN18322c0g1t3~~evgtrinLocDN18322c0g1t3.p1	6.67426	1.61466	3.57211e-05	0.00290733	NA	NA	NA	NA	NA	NA	NA	NA
GENE.evgMSTRG.133686.1~~evgMSTRG.133686.1.p1	8.04661	1.94849	3.63282e-05	0.0029298	evgMSTRG.133686.1.p1	PREDICTED: alpha-1A adrenergic receptor-like [Hydra vulgaris]	1.43e-05	NA	NA	NA	NA	NA
GENE.evgHyS_ScswcV5_3906.g17328.t1~~evgHyS_ScswcV5_3906.g17328.t1.p1	3.43259	0.831212	3.63352e-05	0.0029298	evgHyS_ScswcV5_3906.g17328.t1.p1	PREDICTED: uncharacterized protein LOC100197594 isoform X2 [Hydra vulgaris]	4.73e-51	NA	NA	NA	NA	NA
GENE.evgHyS_ScswcV5_3298.g13159.t1~~evgHyS_ScswcV5_3298.g13159.t1.p1	7.89935	1.92523	4.07687e-05	0.00324205	evgHyS_ScswcV5_3298.g13159.t1.p1	PREDICTED: protein APCDD1-like [Hydra vulgaris]	2.8e-102	NA	NA	NA	NA	NA
GENE.evgMSTRG.122706.1~~evgMSTRG.122706.1.p1	3.26544	0.799172	4.38829e-05	0.00342682	evgMSTRG.122706.1.p1	PREDICTED: zinc finger C3H1 domain-containing protein-like [Hydra vulgaris]	0	NA	NA	NA	NA	NA
GENE.evgtrinLocDN14467c0g1t12~~evgtrinLocDN14467c0g1t12.p1	3.25201	0.801398	4.95115e-05	0.00383183	evgtrinLocDN14467c0g1t12.p1	uncharacterized protein LOC113675019 [Pocillopora damicornis]	3.91e-06	NA	NA	NA	NA	NA
GENE.evgHyS_ScswcV5_4037.g18103.t1~~evgHyS_ScswcV5_4037.g18103.t1.p1	5.70404	1.40867	5.13838e-05	0.00395906	evgHyS_ScswcV5_4037.g18103.t1.p1	PREDICTED: adenosine receptor A2b-like [Hydra vulgaris]	4.44e-71	Alpha-1A adrenergic receptor	NA	G protein-coupled receptor activity	G protein-coupled receptor signaling pathway	integral component of plasma membrane
GENE.evgHyS_ScswcV5_644.g2259.t1~~evgHyS_ScswcV5_644.g2259.t1.p1	2.90982	0.71897	5.18324e-05	0.00397595	evgHyS_ScswcV5_644.g2259.t1.p1	PREDICTED: receptor-type tyrosine-protein phosphatase N2-like [Hydra vulgaris]	0	NA	NA	NA	NA	NA
GENE.evgHyS_ScswcV5_3153.g12498.t1~~evgHyS_ScswcV5_3153.g12498.t1.p1	5.41627	1.34329	5.52839e-05	0.00414316	evgHyS_ScswcV5_3153.g12498.t1.p1	PREDICTED: alpha-1,3-mannosyl-glycoprotein 2-beta-N-acetylglucosaminyltransferase-like [Hydra vulgaris]	2.71e-160	Mutant N-acetylglucosaminyltransferase I	MGAT1	acetylglucosaminyltransferase activity	protein glycosylation	Golgi apparatus
GENE.evgHyS_ScswcV5_644.g2211.t1~~evgHyS_ScswcV5_644.g2211.t1.p1	2.88988	0.716843	5.54461e-05	0.00414316	evgHyS_ScswcV5_644.g2211.t1.p1	neural alfa2 tubulin [Paracentrotus lividus]	0	Tubulin alpha chain	NA	structural constituent of cytoskeleton	microtubule-based process	microtubule
GENE.evgtrinLocDN40349c0g1t10~~evgtrinLocDN40349c0g1t10.p1	4.07845	1.01527	5.89174e-05	0.00438366	evgtrinLocDN40349c0g1t10.p1	PREDICTED: uncharacterized protein LOC100212316 [Hydra vulgaris]	3.02e-109	NA	NA	NA	NA	NA
GENE.evgtrinLocDN57278c0g1t3~~evgtrinLocDN57278c0g1t3.p1	4.97365	1.23979	6.02856e-05	0.00440054	evgtrinLocDN57278c0g1t3.p1	PREDICTED: muscarinic acetylcholine receptor M3-like [Hydra vulgaris]	3.65e-49	NA	NA	NA	NA	NA
GENE.evgtrinLocDN3466c2g1t4~~evgtrinLocDN3466c2g1t4.p1	8.2792	2.06445	6.06236e-05	0.00440054	evgtrinLocDN3466c2g1t4.p1	PREDICTED: uncharacterized protein LOC107350703 isoform X1 [Acropora digitifera]	7.69e-34	NA	NA	NA	NA	NA
GENE.evgHyS_ScswcV5_1951.g7984.t1~~evgHyS_ScswcV5_1951.g7984.t1.p1	4.89295	1.22218	6.2419e-05	0.00445307	evgHyS_ScswcV5_1951.g7984.t1.p1	PREDICTED: uncharacterized protein LOC101241042 [Hydra vulgaris]	0	NA	NA	NA	NA	NA
GENE.evgMSTRG.84373.1~~evgMSTRG.84373.1.p1	7.17301	1.79516	6.44925e-05	0.00454488	evgMSTRG.84373.1.p1	predicted protein [Nematostella vectensis]	2.54e-65	NA	NA	NA	NA	NA
GENE.evgtrinLocDN14466c0g1t11~~evgtrinLocDN14466c0g1t11.p1	4.548	1.13849	6.47608e-05	0.00454531	evgtrinLocDN14466c0g1t11.p1	potassium channel subfamily K member 9-like [Exaiptasia pallida]	3.71e-86	Two pore potassium channel protein sup-9	NA	potassium channel activity	potassium ion transmembrane transport	integral component of membrane
GENE.evgMSTRG.112085.1~~evgMSTRG.112085.1.p1	8.67797	2.17883	6.80927e-05	0.00472182	evgMSTRG.112085.1.p1	hypothetical protein pdam_00008529 [Pocillopora damicornis]	7.47e-05	NA	NA	NA	NA	NA
GENE.evgtrinLocDN20154c1g1t1~~evgtrinLocDN20154c1g1t1.p1	7.27479	1.8282	6.91459e-05	0.004738	evgtrinLocDN20154c1g1t1.p1	hypothetical protein CAPTEDRAFT_201533 [Capitella teleta]	7.74e-13	NA	NA	NA	NA	NA
GENE.evgHyS_ScswcV5_2503.g9780.t1~~evgHyS_ScswcV5_2503.g9780.t1.p1	8.65966	2.1776	6.98767e-05	0.00474185	evgHyS_ScswcV5_2503.g9780.t1.p1	PREDICTED: caspase-3-like [Hydra vulgaris]	2.97e-86	CARD-caspase	CASP6	cysteine-type endopeptidase activity	execution phase of apoptosis	nucleoplasm
GENE.evgHyS_ScswcV5_4075.g18542.t1~~evgHyS_ScswcV5_4075.g18542.t1.p1	7.75933	1.95144	7.00227e-05	0.00474185	evgHyS_ScswcV5_4075.g18542.t1.p1	PREDICTED: uncharacterized protein LOC109469705 isoform X1 [Branchiostoma belcheri]	1.81e-87	NA	NA	NA	NA	NA
GENE.evgtrinLocDN28999c0g1t24~~evgtrinLocDN28999c0g1t24.p1	5.29221	1.33137	7.0371e-05	0.0047469	evgtrinLocDN28999c0g1t24.p1	PREDICTED: cartilage oligomeric matrix protein-like [Hydra vulgaris]	0	Trhombospondin Bi	THBS1	calcium ion binding	cell adhesion	extracellular region
GENE.evgHyS_ScswcV5_664.g2962.t1~~evgHyS_ScswcV5_664.g2962.t1.p1	5.25302	1.32561	7.40994e-05	0.00495979	evgHyS_ScswcV5_664.g2962.t1.p1	PREDICTED: uncharacterized protein LOC105846770 [Hydra vulgaris]	0	NA	NA	NA	NA	NA
GENE.evgtrinLocDN9584c2g1t2~~evgtrinLocDN9584c2g1t2.p1	3.83855	0.97112	7.72724e-05	0.00513254	evgtrinLocDN9584c2g1t2.p1	predicted protein [Nematostella vectensis]	1.67e-25	NA	NA	NA	NA	NA
GENE.evgtrinLocDN24952c1g1t15~~evgtrinLocDN24952c1g1t15.p1	5.27669	1.33725	7.94956e-05	0.00526006	evgtrinLocDN24952c1g1t15.p1	melatonin receptor type 1A-like [Stylophora pistillata]	3.11e-16	NA	NA	NA	NA	NA
GENE.evgHyS_ScswcV5_457.g1893.t1~~evgHyS_ScswcV5_457.g1893.t1.p1	7.85981	2.00313	8.71728e-05	0.00572435	evgHyS_ScswcV5_457.g1893.t1.p1	uncharacterized protein LOC112687678 [Sipha flava]	0.2	NA	NA	NA	NA	NA
GENE.evgHyS_ScswcV5_2832.g11527.t1~~evgHyS_ScswcV5_2832.g11527.t1.p1	4.5121	1.16059	0.000101174	0.00649613	evgHyS_ScswcV5_2832.g11527.t1.p1	PREDICTED: ceramide glucosyltransferase-B-like [Hydra vulgaris]	4.51e-131	UDP-glucose ceramide glucosyltransferase	UGCG	ceramide glucosyltransferase activity	glycosphingolipid metabolic process	Golgi membrane
GENE.evgHyS_ScswcV5_1783.g7133.t1~~evgHyS_ScswcV5_1783.g7133.t1.p1	6.7041	1.72759	0.000104191	0.00666513	evgHyS_ScswcV5_1783.g7133.t1.p1	PREDICTED: fibroblast growth factor receptor 1-like [Hydra vulgaris]	0	Eph receptor A6	NA	protein tyrosine kinase activity	peptidyl-tyrosine phosphorylation	membrane raft
GENE.evgHyS_ScswcV5_3309.g13894.t1~~evgHyS_ScswcV5_3309.g13894.t1.p1	2.2451	0.579596	0.000107261	0.00678642	evgHyS_ScswcV5_3309.g13894.t1.p1	alpha-adducin-like [Exaiptasia pallida]	1.03e-144	Hu-li tai shao	LOC106164440	spectrin binding	barbed-end actin filament capping	cytoskeleton
GENE.evgtrinLocDN416c0g1t10~~evgtrinLocDN416c0g1t10.p1	7.94672	2.06225	0.000116481	0.00728993	evgtrinLocDN416c0g1t10.p1	uncharacterized protein LOC111122653 [Crassostrea virginica]	1.4	NA	NA	NA	NA	NA
GENE.evgtrinLocDN211794c0g1t7~~evgtrinLocDN211794c0g1t7.p1	6.03912	1.57219	0.000122426	0.00755296	evgtrinLocDN211794c0g1t7.p1	hypothetical protein NEMVEDRAFT_v1g146147 [Nematostella vectensis]	0.096	NA	NA	NA	NA	NA
GENE.evgtrinLocDN5736c3g1t6~~evgtrinLocDN5736c3g1t6.p1	7.06585	1.84118	0.000124206	0.00763558	evgtrinLocDN5736c3g1t6.p1	PREDICTED: olfactory receptor Olfr180-like [Austrofundulus limnaeus]	5.3	NA	NA	NA	NA	NA
GENE.evgHyS_ScswcV5_3204.g12896.t1~~evgHyS_ScswcV5_3204.g12896.t1.p1	3.26394	0.851074	0.00012552	0.00768911	evgHyS_ScswcV5_3204.g12896.t1.p1	PREDICTED: titin isoform X2 [Latimeria chalumnae]	2.24e-08	NA	NA	NA	NA	NA
GENE.evgMSTRG.133152.1~~evgMSTRG.133152.1.p1	3.44653	0.899439	0.000127176	0.0077618	evgMSTRG.133152.1.p1	proline-rich transmembrane protein 1-like [Pocillopora damicornis]	1.12e-12	Proline-rich transmembrane protein 1	NA	calcium-dependent phospholipid binding	xenobiotic metabolic process	outer membrane
GENE.evgHyS_ScswcV5_2444.g9387.t1~~evgHyS_ScswcV5_2444.g9387.t1.p1	8.68046	2.26582	0.000127602	0.0077618	evgHyS_ScswcV5_2444.g9387.t1.p1	TNF receptor-associated factor 6-B-like isoform X1 [Orbicella faveolata]	2.07e-34	NA	NA	NA	NA	NA
GENE.evgHyS_ScswcV5_644.g2176.t1~~evgHyS_ScswcV5_644.g2176.t1.p1	3.35096	0.87862	0.000136797	0.00821096	evgHyS_ScswcV5_644.g2176.t1.p1	PREDICTED: unconventional myosin-Ia-like [Hydra vulgaris]	0	Unconventional myosin-Ic-A	NA	actin binding	actin filament-based process	myosin complex
GENE.evgMSTRG.26049.2~~evgMSTRG.26049.2.p1	3.71104	0.974415	0.000139825	0.00832993	evgMSTRG.26049.2.p1	PREDICTED: alcohol dehydrogenase class-3-like [Hydra vulgaris]	0	S-(hydroxymethyl)glutathione dehydrogenase	NA	S-(hydroxymethyl)glutathione dehydrogenase activity	ethanol oxidation	endoplasmic reticulum membrane
GENE.evgHyS_ScswcV5_885.g3719.t1~~evgHyS_ScswcV5_885.g3719.t1.p1	4.8567	1.27791	0.000144398	0.0085632	evgHyS_ScswcV5_885.g3719.t1.p1	PREDICTED: protein misato homolog 1-like [Hydra vulgaris]	7.54e-153	Misato 1, mitochondrial distribution and morphology regulator	NA	NA	NA	NA
GENE.evgHyS_ScswcV5_2548.g10066.t1~~evgHyS_ScswcV5_2548.g10066.t1.p1	3.26241	0.865538	0.000163756	0.00943146	evgHyS_ScswcV5_2548.g10066.t1.p1	PREDICTED: heat shock cognate 71 kDa protein isoform X1 [Branchiostoma belcheri]	0	Molecular chaperone DnaK	NA	ATP binding	response to heat	cytosol
GENE.evgtrinLocDN7519c0g3t1~~evgtrinLocDN7519c0g3t1.p1	7.44704	1.98319	0.000173283	0.0098493	evgtrinLocDN7519c0g3t1.p1	hypothetical protein CRE_19580 [Caenorhabditis remanei]	1.9	NA	NA	NA	NA	NA
GENE.evgHyS_ScswcV5_4270.g19734.t1~~evgHyS_ScswcV5_4270.g19734.t1.p1	2.92512	0.779922	0.000176462	0.00993231	evgHyS_ScswcV5_4270.g19734.t1.p1	PREDICTED: uncharacterized protein LOC100206690 [Hydra vulgaris]	2.19e-32	NA	NA	NA	NA	NA
GENE.evgHyS_ScswcV5_3470.g14573.t1~~evgHyS_ScswcV5_3470.g14573.t1.p1	4.46839	1.1956	0.000185966	0.010333	evgHyS_ScswcV5_3470.g14573.t1.p1	6-bladed beta-propeller, partial [Methanosarcina spelaei]	2.43e-23	NA	NA	NA	NA	NA
GENE.evgtrinLocDN5752c0g1t11~~evgtrinLocDN5752c0g1t11.p1	5.05225	1.35301	0.000188393	0.0104344	evgtrinLocDN5752c0g1t11.p1	PREDICTED: cerberus-like [Sinocyclocheilus rhinocerous]	4.14e-06	NA	NA	NA	NA	NA
GENE.evgtrinLocDN21197c1g1t10~~evgtrinLocDN21197c1g1t10.p1	6.46594	1.7339	0.000192141	0.0106081	evgtrinLocDN21197c1g1t10.p1	PREDICTED: fibroleukin-like [Biomphalaria glabrata]	1.27e-11	NA	NA	NA	NA	NA
GENE.evgtrinLocDN43662c0g1t8~~evgtrinLocDN43662c0g1t8.p1	2.39596	0.644578	0.000201528	0.0110911	evgtrinLocDN43662c0g1t8.p1	hypothetical protein CPAR2_107200 [Candida parapsilosis]	2	NA	NA	NA	NA	NA
GENE.evgMSTRG.24855.1~~evgMSTRG.24855.1.p1	5.6273	1.51845	0.000210598	0.0114092	evgMSTRG.24855.1.p1	DUF4116 domain-containing protein, partial [Flavobacterium sp.]	6.15e-15	NA	NA	NA	NA	NA
GENE.evgHyS_ScswcV5_4378.g20530.t1~~evgHyS_ScswcV5_4378.g20530.t1.p1	2.34314	0.636904	0.000234188	0.0123815	evgHyS_ScswcV5_4378.g20530.t1.p1	hypothetical protein Z043_113914, partial [Scleropages formosus]	3.9e-74	NA	NA	NA	NA	NA
GENE.evgtrinLocDN24024c1g1t3~~evgtrinLocDN24024c1g1t3.p1	7.79049	2.12195	0.000241241	0.0126977	evgtrinLocDN24024c1g1t3.p1	hypothetical protein AWC38_SpisGene21522 [Stylophora pistillata]	3.16e-28	NA	NA	NA	NA	NA
GENE.evgtrinLocDN54876c0g1t9~~evgtrinLocDN54876c0g1t9.p1	2.82514	0.770609	0.000246264	0.0128591	NA	NA	NA	NA	NA	NA	NA	NA
GENE.evgtrinLocDN25652c0g1t1~~evgtrinLocDN25652c0g1t1.p1	7.19536	1.96468	0.000249901	0.0130099	NA	NA	NA	NA	NA	NA	NA	NA
GENE.evgHyS_ScswcV5_457.g1654.t1~~evgHyS_ScswcV5_457.g1654.t1.p1	6.79466	1.85569	0.000250706	0.0130127	NA	NA	NA	NA	NA	NA	NA	NA
GENE.evgMSTRG.137360.1~~evgMSTRG.137360.1.p1	8.3114	2.27063	0.000251827	0.0130319	evgMSTRG.137360.1.p1	hypothetical protein AC249_AIPGENE2972 [Exaiptasia pallida]	4.12e-61	Mediator of RNA polymerase II transcription subunit 13 (Fragment)	NA	NA	NA	NA
GENE.evgtrinLocDN8132c0g1t14~~evgtrinLocDN8132c0g1t14.p1	5.72526	1.57126	0.000268701	0.0137425	evgtrinLocDN8132c0g1t14.p1	PREDICTED: notch-regulated ankyrin repeat-containing protein-like [Hydra vulgaris]	1.38e-18	Putative Ankyrin repeat domain-containing protein (Fragment)	NA	glycerophosphocholine phosphodiesterase activity	BMP signaling pathway involved in mesodermal cell fate specification	nucleus
GENE.evgtrinLocDN53768c0g1t5~~evgtrinLocDN53768c0g1t5.p1	7.85132	2.15476	0.00026873	0.0137425	evgtrinLocDN53768c0g1t5.p1	hypothetical protein pdam_00010359 [Pocillopora damicornis]	4.2	NA	NA	NA	NA	NA
GENE.evgHyS_ScswcV5_2988.g11845.t1~~evgHyS_ScswcV5_2988.g11845.t1.p1	4.17544	1.14856	0.000277587	0.0141537	evgHyS_ScswcV5_2988.g11845.t1.p1	PREDICTED: uncharacterized protein LOC100206068 [Hydra vulgaris]	0	G-protein coupled receptor 126	NA	sequence-specific DNA binding	multicellular organism development	nucleus
GENE.evgHyS_ScswcV5_3896.g17027.t1~~evgHyS_ScswcV5_3896.g17027.t1.p1	4.04386	1.11513	0.000287461	0.0145714	evgHyS_ScswcV5_3896.g17027.t1.p1	dynein gamma chain, flagellar outer arm-like isoform X3 [Stylophora pistillata]	0	Dynein heavy chain 5, axonemal	NA	microtubule motor activity	microtubule-based movement	dynein complex
GENE.evgtrinLocDN19836c0g1t12~~evgtrinLocDN19836c0g1t12.p2	4.99564	1.37946	0.000292955	0.0147636	evgtrinLocDN19836c0g1t12.p2	PREDICTED: ankyrin repeat domain-containing protein 49-like [Hydra vulgaris]	2.87e-39	NA	NA	NA	NA	NA
GENE.evgHyS_ScswcV5_1198.g4360.t1~~evgHyS_ScswcV5_1198.g4360.t1.p1	4.6548	1.28817	0.000302096	0.0151362	NA	NA	NA	NA	NA	NA	NA	NA
GENE.evgMSTRG.109192.1~~evgMSTRG.109192.1.p1	4.87893	1.35149	0.00030614	0.0152372	evgMSTRG.109192.1.p1	metabotropic glutamate receptor 2-like [Orbicella faveolata]	3.64e-80	Metabotropic glutamate receptor 4 (Fragment)	NA	G protein-coupled receptor activity	G protein-coupled receptor signaling pathway	plasma membrane
GENE.evgMSTRG.18888.1~~evgMSTRG.18888.1.p1	7.71749	2.13809	0.000306747	0.0152372	evgMSTRG.18888.1.p1	hypothetical protein BpHYR1_050669 [Brachionus plicatilis]	2.27e-51	NA	NA	NA	NA	NA
GENE.evgHyS_ScswcV5_3339.g13989.t1~~evgHyS_ScswcV5_3339.g13989.t1.p1	8.17737	2.279	0.000333041	0.0161726	evgHyS_ScswcV5_3339.g13989.t1.p1	PREDICTED: uncharacterized protein LOC101238924 [Hydra vulgaris]	2.52e-26	NA	NA	NA	NA	NA
GENE.evgtrinLocDN61513c0g1t11~~evgtrinLocDN61513c0g1t11.p1	5.79011	1.6149	0.000336531	0.0162964	evgtrinLocDN61513c0g1t11.p1	trace amine-associated receptor 8a-like [Exaiptasia pallida]	5.06e-06	NA	NA	NA	NA	NA
GENE.evgMSTRG.100546.1~~evgMSTRG.100546.1.p1	6.03527	1.68906	0.00035271	0.0169379	evgMSTRG.100546.1.p1	predicted protein [Nematostella vectensis]	1.94e-56	NA	NA	NA	NA	NA
GENE.evgHyS_ScswcV5_66.g549.t1~~evgHyS_ScswcV5_66.g549.t1.p1	3.2098	0.905488	0.000392867	0.0186086	evgHyS_ScswcV5_66.g549.t1.p1	PREDICTED: voltage-dependent L-type calcium channel subunit alpha-1D-like [Hydra vulgaris]	0	Voltage-dependent L-type calcium channel subunit alpha-1S	NA	voltage-gated calcium channel activity	regulation of ion transmembrane transport	voltage-gated calcium channel complex
GENE.evgMSTRG.66501.1~~evgMSTRG.66501.1.p1	5.72681	1.62125	0.000411884	0.0192984	evgMSTRG.66501.1.p1	PREDICTED: C-1-tetrahydrofolate synthase, cytoplasmic-like [Hydra vulgaris]	1.32e-152	Bifunctional methylenetetrahydrofolate dehydrogenase/methenyltetrahydrofolate cyclohydrolase FolD	FOLD	methylenetetrahydrofolate dehydrogenase (NADP+) activity	oxidation-reduction process	cytoplasm
GENE.evgMSTRG.68844.1~~evgMSTRG.68844.1.p1	7.93307	2.25057	0.000423606	0.0197942	evgMSTRG.68844.1.p1	uncharacterized protein LOC111345373 [Stylophora pistillata]	1.95e-44	NA	NA	NA	NA	NA
GENE.evgHyS_ScswcV5_664.g2911.t1~~evgHyS_ScswcV5_664.g2911.t1.p1	6.72283	1.91045	0.000433219	0.0201348	evgHyS_ScswcV5_664.g2911.t1.p1	PREDICTED: probable rRNA-processing protein EBP2 [Hydra vulgaris]	4.05e-74	Probable rRNA-processing protein EBP2	EBNA1BP2	identical protein binding	ribosomal large subunit biogenesis	nucleolus
GENE.evgMSTRG.38942.1~~evgMSTRG.38942.1.p1	3.90184	1.11298	0.000455291	0.0208089	evgMSTRG.38942.1.p1	PREDICTED: BMP-binding endothelial regulator protein-like [Hydra vulgaris]	5.25e-11	NA	NA	NA	NA	NA
GENE.evgMSTRG.46647.1~~evgMSTRG.46647.1.p1	3.33274	0.950874	0.000456745	0.0208089	evgMSTRG.46647.1.p1	SoxE2, partial [Hydractinia echinata]	0	Sex determining region Y-box 8	SOX8	DNA-binding transcription factor activity, RNA polymerase II-specific	regulation of transcription by RNA polymerase II	nucleus
GENE.evgHyS_ScswcV5_3887.g16831.t1~~evgHyS_ScswcV5_3887.g16831.t1.p1	4.67669	1.33445	0.000457325	0.0208089	evgHyS_ScswcV5_3887.g16831.t1.p1	PREDICTED: DNA polymerase subunit gamma-1-like [Strongylocentrotus purpuratus]	0	DNA polymerase gamma, catalytic subunit	NA	DNA-directed DNA polymerase activity	DNA biosynthetic process	gamma DNA polymerase complex
GENE.evgMSTRG.120235.11~~evgMSTRG.120235.11.p1	3.76629	1.07781	0.000475145	0.0214508	evgMSTRG.120235.11.p1	PREDICTED: phosphorylase b kinase regulatory subunit alpha, skeletal muscle isoform-like, partial [Hydra vulgaris]	2.23e-49	NA	NA	NA	NA	NA
GENE.evgHyS_ScswcV5_644.g2022.t1~~evgHyS_ScswcV5_644.g2022.t1.p1	5.8059	1.66633	0.000493526	0.0221079	evgHyS_ScswcV5_644.g2022.t1.p1	uncharacterized protein LOC111343126 [Stylophora pistillata]	0.001	NA	NA	NA	NA	NA
GENE.evgMSTRG.111268.1~~evgMSTRG.111268.1.p1	2.78292	0.799487	0.000499766	0.0223297	evgMSTRG.111268.1.p1	PREDICTED: epidermal growth factor receptor kinase substrate 8-like isoform X1 [Hydra vulgaris]	2.49e-106	NA	NA	NA	NA	NA
GENE.evgHyS_ScswcV5_937.g3817.t1~~evgHyS_ScswcV5_937.g3817.t1.p1	2.13804	0.615152	0.000509639	0.0227124	evgHyS_ScswcV5_937.g3817.t1.p1	PREDICTED: spectrin beta chain, non-erythrocytic 1-like [Hydra vulgaris]	0	Spectrin beta chain	NA	structural constituent of cytoskeleton	actin filament capping	spectrin
GENE.evgtrinLocDN30687c0g1t4~~evgtrinLocDN30687c0g1t4.p1	6.30542	1.81634	0.000517577	0.023007	evgtrinLocDN30687c0g1t4.p1	PREDICTED: ribosome production factor 1-like [Hydra vulgaris]	1.48e-157	Ribosome production factor 1	RPF1	rRNA primary transcript binding	rRNA processing	preribosome, large subunit precursor
GENE.evgMSTRG.51472.1~~evgMSTRG.51472.1.p1	4.96559	1.43176	0.00052404	0.0232347	evgMSTRG.51472.1.p1	ferrochelatase [Haloplanus vescus]	1.4	NA	NA	NA	NA	NA
GENE.evgHyS_ScswcV5_3655.g15745.t1~~evgHyS_ScswcV5_3655.g15745.t1.p1	6.13509	1.77509	0.000547837	0.0240348	evgHyS_ScswcV5_3655.g15745.t1.p1	DUF3164 family protein [Schleiferia sp. LA]	4.6	NA	NA	NA	NA	NA
GENE.evgMSTRG.138231.2~~evgMSTRG.138231.2.p1	5.05336	1.4642	0.000557925	0.024302	evgMSTRG.138231.2.p1	amidohydrolase [Caulobacter sp. K31]	0.17	NA	NA	NA	NA	NA
GENE.evgtrinLocDN291432c0g2t1~~evgtrinLocDN291432c0g2t1.p1	7.3667	2.13874	0.00057231	0.0246805	evgtrinLocDN291432c0g2t1.p1	PAS domain S-box protein [Algoriphagus antarcticus]	3.4	NA	NA	NA	NA	NA
GENE.evgtrinLocDN7014c8g1t1~~evgtrinLocDN7014c8g1t1.p1	7.47545	2.17538	0.000589534	0.0251109	evgtrinLocDN7014c8g1t1.p1	hypothetical protein AC249_AIPGENE10204 [Exaiptasia pallida]	2.65e-14	NA	NA	NA	NA	NA
GENE.evgHyS_ScswcV5_3339.g14058.t1~~evgHyS_ScswcV5_3339.g14058.t1.p1	6.85461	1.99651	0.000596306	0.0252752	evgHyS_ScswcV5_3339.g14058.t1.p1	PREDICTED: uncharacterized protein LOC100209664 [Hydra vulgaris]	0.000122	NA	NA	NA	NA	NA
GENE.evgHyS_ScswcV5_3062.g12017.t1~~evgHyS_ScswcV5_3062.g12017.t1.p1	6.80054	1.98236	0.000602428	0.0254724	evgHyS_ScswcV5_3062.g12017.t1.p1	hypothetical protein AM593_04457, partial [Mytilus galloprovincialis]	7.69e-38	NA	NA	NA	NA	NA
GENE.evgtrinLocDN28390c1g1t10~~evgtrinLocDN28390c1g1t10.p1	7.13956	2.08273	0.000608102	0.0256498	evgtrinLocDN28390c1g1t10.p1	PREDICTED: receptor-type tyrosine-protein phosphatase alpha-like [Hydra vulgaris]	7.11e-32	NA	NA	NA	NA	NA
GENE.evgtrinLocDN91156c2g1t1~~evgtrinLocDN91156c2g1t1.p1	7.21589	2.10635	0.000613053	0.025701	evgtrinLocDN91156c2g1t1.p1	tetratricopeptide repeat protein [Marinirhabdus gelatinilytica]	0.008	NA	NA	NA	NA	NA
GENE.evgHyS_ScswcV5_2402.g8915.t1~~evgHyS_ScswcV5_2402.g8915.t1.p1	4.7315	1.3815	0.00061502	0.025701	evgHyS_ScswcV5_2402.g8915.t1.p1	PREDICTED: myosin-2 essential light chain-like [Hydra vulgaris]	7.76e-69	Myosin alkali light chain	NA	calcium ion binding	NA	NA
GENE.evgtrinLocDN3142c0g2t1~~evgtrinLocDN3142c0g2t1.p1	5.86554	1.71267	0.000615247	0.025701	evgtrinLocDN3142c0g2t1.p1	Gamma-aminobutyric acid receptor subunit beta-2 [Stylophora pistillata]	1.72e-26	NA	NA	NA	NA	NA
GENE.evgMSTRG.37975.1~~evgMSTRG.37975.1.p1	2.19106	0.64	0.000618118	0.0257465	evgMSTRG.37975.1.p1	PREDICTED: uncharacterized protein LOC106806144 [Priapulus caudatus]	2.66e-74	NA	NA	NA	NA	NA
GENE.evgHyS_ScswcV5_3574.g15499.t1~~evgHyS_ScswcV5_3574.g15499.t1.p1	2.60566	0.761727	0.000624534	0.0259017	evgHyS_ScswcV5_3574.g15499.t1.p1	PREDICTED: putative histone-lysine N-methyltransferase PRDM6 [Hydra vulgaris]	3.24e-129	probable histone-lysine N-methyltransferase PRDM7 isoform X2	NA	chromatin DNA binding	methylation	nucleus
GENE.evgHyS_ScswcV5_4051.g18308.t1~~evgHyS_ScswcV5_4051.g18308.t1.p1	6.36432	1.86457	0.000641827	0.0264292	evgHyS_ScswcV5_4051.g18308.t1.p1	PREDICTED: peptide deformylase 1A, chloroplastic-like [Hydra vulgaris]	2.68e-72	Peptide deformylase, mitochondrial	DEF	peptide deformylase activity	translation	NA
GENE.evgHyS_ScswcV5_1219.g4578.t1~~evgHyS_ScswcV5_1219.g4578.t1.p1	2.57899	0.757486	0.000662431	0.0270847	evgHyS_ScswcV5_1219.g4578.t1.p1	PREDICTED: uncharacterized protein LOC105843867 [Hydra vulgaris]	1.61e-46	NA	NA	NA	NA	NA
GENE.evgHyS_ScswcV5_1823.g7473.t1~~evgHyS_ScswcV5_1823.g7473.t1.p1	5.04685	1.48633	0.000684999	0.027681	evgHyS_ScswcV5_1823.g7473.t1.p1	aquaporin FA-CHIP-like [Oncorhynchus mykiss]	1.28e-52	Aquaporin FA-CHIP	NA	channel activity	carbon dioxide transport	basal plasma membrane
GENE.evgtrinLocDN50431c1g1t4~~evgtrinLocDN50431c1g1t4.p1	5.07184	1.49517	0.000693483	0.0278938	evgtrinLocDN50431c1g1t4.p1	PREDICTED: uncharacterized protein LOC105849096 [Hydra vulgaris]	3.5e-35	NA	NA	NA	NA	NA
GENE.evgHyS_ScswcV5_4196.g19121.t1~~evgHyS_ScswcV5_4196.g19121.t1.p1	4.25225	1.25806	0.000724844	0.0287504	evgHyS_ScswcV5_4196.g19121.t1.p1	PREDICTED: RNA-binding protein Musashi homolog 2-like isoform X2 [Hydra vulgaris]	1.01e-81	RNA recognition motif-containing protein	NA	RNA binding	chitin metabolic process	polysome
GENE.evgMSTRG.29443.1~~evgMSTRG.29443.1.p1	7.38479	2.18647	0.000731497	0.028821	evgMSTRG.29443.1.p1	hypothetical protein CEUSTIGMA_g10029.t1 [Chlamydomonas eustigma]	0.002	NA	NA	NA	NA	NA
GENE.evgHyS_ScswcV5_664.g2881.t1~~evgHyS_ScswcV5_664.g2881.t1.p1	2.96348	0.878484	0.000742458	0.0288522	evgHyS_ScswcV5_664.g2881.t1.p1	hypothetical protein pdam_00003041 [Pocillopora damicornis]	1.78e-21	NA	NA	NA	NA	NA
GENE.evgHyS_ScswcV5_1734.g6029.t1~~evgHyS_ScswcV5_1734.g6029.t1.p1	3.35848	0.995599	0.000742669	0.0288522	NA	NA	NA	NA	NA	NA	NA	NA
GENE.evgHyS_ScswcV5_3298.g13591.t1~~evgHyS_ScswcV5_3298.g13591.t1.p1	4.60329	1.36481	0.00074394	0.0288522	evgHyS_ScswcV5_3298.g13591.t1.p1	PREDICTED: uncharacterized protein LOC106740649 isoform X3 [Dinoponera quadriceps]	5.53e-45	NA	NA	NA	NA	NA
GENE.evgtrinLocDN11640c0g2t5~~evgtrinLocDN11640c0g2t5.p1	5.86615	1.74014	0.000748743	0.0289737	evgtrinLocDN11640c0g2t5.p1	LOW QUALITY PROTEIN: growth hormone-releasing hormone receptor [Dasypus novemcinctus]	0.95	NA	NA	NA	NA	NA
GENE.evgHyS_ScswcV5_290.g1070.t1~~evgHyS_ScswcV5_290.g1070.t1.p1	3.27603	0.974231	0.0007719	0.029737	evgHyS_ScswcV5_290.g1070.t1.p1	potassium channel alpha subunit [Polyorchis penicillatus]	0	Potassium voltage-gated channel protein Shal	NA	voltage-gated potassium channel activity	protein homooligomerization	voltage-gated potassium channel complex
GENE.evgHyS_ScswcV5_1748.g6339.t1~~evgHyS_ScswcV5_1748.g6339.t1.p1	6.4212	1.91036	0.000775897	0.0297588	evgHyS_ScswcV5_1748.g6339.t1.p1	gremlin protein [Acropora digitifera]	4.31e-05	NA	NA	NA	NA	NA
GENE.evgMSTRG.138529.2~~evgMSTRG.138529.2.p1	8.11487	2.41756	0.000788947	0.0300598	evgMSTRG.138529.2.p1	hypothetical protein RclHR1_05880008 [Rhizophagus clarus]	2.43e-19	NA	NA	NA	NA	NA
GENE.evgMSTRG.95717.1~~evgMSTRG.95717.1.p1	5.62503	1.6769	0.000795307	0.0301849	evgMSTRG.95717.1.p1	Hypothetical protein PHPALM_19387, partial [Phytophthora palmivora var. palmivora]	9.18e-28	NA	NA	NA	NA	NA
GENE.evgtrinLocDN33230c1g1t1~~evgtrinLocDN33230c1g1t1.p1	7.74974	2.3104	0.000795714	0.0301849	NA	NA	NA	NA	NA	NA	NA	NA
GENE.evgHyS_ScswcV5_4270.g19607.t1~~evgHyS_ScswcV5_4270.g19607.t1.p1	2.78255	0.829815	0.000798779	0.030235	evgHyS_ScswcV5_4270.g19607.t1.p1	PREDICTED: GTPase-activating Rap/Ran-GAP domain-like protein 3 [Hydra vulgaris]	0	Gtpase activating rap/ran gap domain like protein 3	GARNL3	GTPase activator activity	regulation of small GTPase mediated signal transduction	intracellular membrane-bounded organelle
GENE.evgHyS_ScswcV5_366.g1479.t1~~evgHyS_ScswcV5_366.g1479.t1.p1	4.23086	1.26273	0.000806463	0.0303416	evgHyS_ScswcV5_366.g1479.t1.p1	PREDICTED: mitochondrial dicarboxylate carrier-like [Hydra vulgaris]	1.13e-163	Mitochondrial substrate solute carrier	SLC25A10	transmembrane transporter activity	mitochondrial transport	mitochondrial membrane
GENE.evgMSTRG.34366.1~~evgMSTRG.34366.1.p1	8.11033	2.42068	0.000806846	0.0303416	evgMSTRG.34366.1.p1	Otopetrin-2 [Exaiptasia pallida]	0.11	NA	NA	NA	NA	NA
GENE.evgtrinLocDN18673c0g1t6~~evgtrinLocDN18673c0g1t6.p1	2.23457	0.669537	0.000845383	0.0315173	evgtrinLocDN18673c0g1t6.p1	PREDICTED: triple functional domain protein-like [Hydra vulgaris]	0	Triple functional domain, trio	TRIO	Rho guanyl-nucleotide exchange factor activity	regulation of Rho protein signal transduction	integral component of membrane
GENE.evgtrinLocDN142c0g1t3~~evgtrinLocDN142c0g1t3.p1	4.23672	1.27004	0.000850276	0.0316317	evgtrinLocDN142c0g1t3.p1	uncharacterized protein LOC111103721 [Crassostrea virginica]	6.69e-09	NA	NA	NA	NA	NA
GENE.evgHyS_ScswcV5_2333.g8353.t1~~evgHyS_ScswcV5_2333.g8353.t1.p1	2.60997	0.78285	0.000856293	0.0317874	NA	NA	NA	NA	NA	NA	NA	NA
GENE.evgHyS_ScswcV5_366.g1360.t1~~evgHyS_ScswcV5_366.g1360.t1.p1	6.7948	2.04234	0.000877949	0.032246	evgHyS_ScswcV5_366.g1360.t1.p1	PREDICTED: mitochondrial substrate carrier family protein ucpB-like [Hydra vulgaris]	1.04e-142	Mitochondrial 2-oxoglutarate/malate carrier protein (inferred by orthology to a human protein)	NA	transmembrane transporter activity	transmembrane transport	mitochondrial envelope
GENE.evgtrinLocDN13353c1g1t5~~evgtrinLocDN13353c1g1t5.p1	3.9819	1.19771	0.000885471	0.0324536	evgtrinLocDN13353c1g1t5.p1	hypothetical protein [Betaproteobacteria bacterium GR16-43]	0.92	NA	NA	NA	NA	NA
GENE.evgHyS_ScswcV5_1750.g6570.t1~~evgHyS_ScswcV5_1750.g6570.t1.p1	3.37437	1.01649	0.000901317	0.0328952	evgHyS_ScswcV5_1750.g6570.t1.p1	PREDICTED: uncharacterized protein LOC105846571 [Hydra vulgaris]	7.23e-40	NA	NA	NA	NA	NA
GENE.evgMSTRG.35759.16~~evgMSTRG.35759.16.p1	2.82284	0.85427	0.000951837	0.034521	evgMSTRG.35759.16.p1	PREDICTED: uncharacterized protein LOC105844339 [Hydra vulgaris]	3.27e-55	NA	NA	NA	NA	NA
GENE.evgtrinLocDN29757c0g1t14~~evgtrinLocDN29757c0g1t14.p1	5.5844	1.692	0.000965232	0.0349337	evgtrinLocDN29757c0g1t14.p1	PREDICTED: ribosome biogenesis protein wdr12-like [Hydra vulgaris]	1.25e-152	Ribosome biogenesis protein WDR12	WDR12	ribonucleoprotein complex binding	maturation of LSU-rRNA from tricistronic rRNA transcript (SSU-rRNA, 5.8S rRNA, LSU-rRNA)	preribosome, large subunit precursor
GENE.evgHyS_ScswcV5_3896.g17118.t1~~evgHyS_ScswcV5_3896.g17118.t1.p1	3.58896	1.08771	0.000968403	0.0349755	evgHyS_ScswcV5_3896.g17118.t1.p1	PREDICTED: extracellular calcium-sensing receptor-like [Hydra vulgaris]	0	Metabotropic glutamate receptor	NA	G protein-coupled receptor activity	G protein-coupled receptor signaling pathway	plasma membrane
GENE.evgtrinLocDN12967c0g4t4~~evgtrinLocDN12967c0g4t4.p1	7.99943	2.4317	0.00100315	0.0360801	evgtrinLocDN12967c0g4t4.p1	hypothetical protein [Caloramator australicus]	9.4	NA	NA	NA	NA	NA
GENE.evgMSTRG.36777.1~~evgMSTRG.36777.1.p1	6.10186	1.85637	0.00101266	0.0363468	evgMSTRG.36777.1.p1	chymotrypsinogen B-like [Pocillopora damicornis]	3.64e-73	Sea star regeneration-associated protease SRAP	NA	serine-type endopeptidase activity	proteolysis	extracellular region
GENE.evgHyS_ScswcV5_644.g2401.t1~~evgHyS_ScswcV5_644.g2401.t1.p1	4.58565	1.39683	0.00102742	0.0368003	evgHyS_ScswcV5_644.g2401.t1.p1	PREDICTED: vesicular GABA transporter-like [Hydra vulgaris]	4.38e-125	NA	NA	NA	NA	NA
GENE.evgtrinLocDN48865c0g1t14~~evgtrinLocDN48865c0g1t14.p1	6.06183	1.84896	0.00104356	0.037199	evgtrinLocDN48865c0g1t14.p1	PREDICTED: D(2) dopamine receptor A-like [Hydra vulgaris]	2.46e-74	NA	NA	NA	NA	NA
GENE.evgHyS_ScswcV5_4378.g20468.t1~~evgHyS_ScswcV5_4378.g20468.t1.p1	4.46257	1.36711	0.00109761	0.0385185	evgHyS_ScswcV5_4378.g20468.t1.p1	PREDICTED: exosome complex exonuclease RRP44 [Hydra vulgaris]	0	DIS3 exosome endoribonuclease and 3'-5' exoribonuclease	DIS3	ribonuclease activity	RNA phosphodiester bond hydrolysis	nuclear exosome (RNase complex)
GENE.evgHyS_ScswcV5_2427.g9098.t1~~evgHyS_ScswcV5_2427.g9098.t1.p1	2.74118	0.839945	0.00110038	0.0385377	evgHyS_ScswcV5_2427.g9098.t1.p1	frizzled receptor 3 [Clytia hemisphaerica]	0	Frizzled class receptor 8	NA	Wnt-activated receptor activity	Wnt signaling pathway	integral component of membrane
GENE.evgHyS_ScswcV5_3906.g17298.t1~~evgHyS_ScswcV5_3906.g17298.t1.p1	3.29982	1.01191	0.00111029	0.0388065	evgHyS_ScswcV5_3906.g17298.t1.p1	28S ribosomal protein S9, mitochondrial-like [Exaiptasia pallida]	2.85e-79	28S ribosomal protein S9, mitochondrial	MRPS9	structural constituent of ribosome	translation	ribosome
GENE.evgMSTRG.125209.2~~evgMSTRG.125209.2.p1	5.45857	1.67468	0.00111623	0.0389356	evgMSTRG.125209.2.p1	PREDICTED: uncharacterized protein LOC100214463 [Hydra vulgaris]	1.05e-114	Putative cnidarian restricted protein	NA	NA	NA	NA
GENE.evgMSTRG.122459.1~~evgMSTRG.122459.1.p1	4.06679	1.24952	0.00113522	0.0394836	evgMSTRG.122459.1.p1	PREDICTED: lysine-specific histone demethylase 1B [Hydra vulgaris]	0	Lysine-specific histone demethylase 1B	KDM1B	zinc ion binding	methylation	glycerol-3-phosphate dehydrogenase complex
GENE.evgMSTRG.86725.4~~evgMSTRG.86725.4.p1	3.51088	1.08036	0.00115515	0.0398917	evgMSTRG.86725.4.p1	uncharacterized protein LOC111322067 isoform X2 [Stylophora pistillata]	0.13	NA	NA	NA	NA	NA
GENE.evgtrinLocDN24459c0g1t10~~evgtrinLocDN24459c0g1t10.p1	3.84186	1.18377	0.00117269	0.040417	evgtrinLocDN24459c0g1t10.p1	uncharacterized protein LOC109139790 [Larimichthys crocea]	3.08e-35	NA	NA	NA	NA	NA
GENE.evgHyS_ScswcV5_644.g2513.t1~~evgHyS_ScswcV5_644.g2513.t1.p1	5.38139	1.66208	0.00120483	0.0413047	evgHyS_ScswcV5_644.g2513.t1.p1	cytochrome b561-like [Exaiptasia pallida]	2.51e-59	Cytochrome b561 family member A3	CYB561A3	oxidoreductase activity	oxidation-reduction process	late endosome membrane
GENE.evgHyS_ScswcV5_644.g2108.t1~~evgHyS_ScswcV5_644.g2108.t1.p1	2.78731	0.861082	0.00120798	0.0413047	evgHyS_ScswcV5_644.g2108.t1.p1	PREDICTED: uncharacterized protein LOC100205256 isoform X1 [Hydra vulgaris]	1.36e-08	NA	NA	NA	NA	NA
GENE.evgHyS_ScswcV5_4270.g20103.t1~~evgHyS_ScswcV5_4270.g20103.t1.p1	6.40198	1.9855	0.00126248	0.0429146	evgHyS_ScswcV5_4270.g20103.t1.p1	PREDICTED: D(1A) dopamine receptor-like [Hydra vulgaris]	2.9e-82	NA	NA	NA	NA	NA
GENE.evgMSTRG.108497.1~~evgMSTRG.108497.1.p1	4.35641	1.35179	0.00126994	0.0430125	evgMSTRG.108497.1.p1	PREDICTED: melanocyte-stimulating hormone receptor-like [Hydra vulgaris]	6.94e-38	NA	NA	NA	NA	NA
GENE.evgHyS_ScswcV5_1336.g5085.t1~~evgHyS_ScswcV5_1336.g5085.t1.p1	4.92173	1.52725	0.00127033	0.0430125	evgHyS_ScswcV5_1336.g5085.t1.p1	PREDICTED: uncharacterized protein LOC101240044 [Hydra vulgaris]	1.88e-20	NA	NA	NA	NA	NA
GENE.evgHyS_ScswcV5_2556.g10171.t1~~evgHyS_ScswcV5_2556.g10171.t1.p1	1.98005	0.616902	0.0013289	0.0446341	evgHyS_ScswcV5_2556.g10171.t1.p1	PREDICTED: EGF-like module-containing mucin-like hormone receptor-like 4 [Hydra vulgaris]	1.89e-170	NA	NA	NA	NA	NA
GENE.evgMSTRG.2887.1~~evgMSTRG.2887.1.p1	6.80925	2.12273	0.00133764	0.044767	evgMSTRG.2887.1.p1	predicted protein [Nematostella vectensis]	3e-38	NA	NA	NA	NA	NA
GENE.evgMSTRG.111718.1~~evgMSTRG.111718.1.p1	2.29669	0.717235	0.00136409	0.0454025	evgMSTRG.111718.1.p1	PREDICTED: sodium/potassium-transporting ATPase subunit beta-1-like [Hydra vulgaris]	1.4e-53	Sodium/potassium-transporting ATPase subunit beta	ATP1B2	sodium:potassium-exchanging ATPase activity	sodium ion transport	sodium:potassium-exchanging ATPase complex
GENE.evgtrinLocDN25704c0g1t1~~evgtrinLocDN25704c0g1t1.p1	3.6567	1.14262	0.00137299	0.0455107	evgtrinLocDN25704c0g1t1.p1	hypothetical protein AC249_AIPGENE14283 [Exaiptasia pallida]	5.97e-21	NA	NA	NA	NA	NA
GENE.evgHyS_ScswcV5_1907.g7649.t1~~evgHyS_ScswcV5_1907.g7649.t1.p1	4.20949	1.31739	0.00139673	0.0460212	evgHyS_ScswcV5_1907.g7649.t1.p1	PREDICTED: protein enabled homolog [Neodiprion lecontei]	1.4	NA	NA	NA	NA	NA
GENE.evgHyS_ScswcV5_2444.g9457.t1~~evgHyS_ScswcV5_2444.g9457.t1.p1	4.34674	1.36054	0.00139901	0.0460212	evgHyS_ScswcV5_2444.g9457.t1.p1	PREDICTED: amiloride-sensitive sodium channel subunit gamma-like [Lepisosteus oculatus]	6.03e-30	Sodium channel epithelial 1 gamma subunit	ASIC5	sodium channel activity	sodium ion transmembrane transport	integral component of membrane
GENE.evgtrinLocDN63128c1g1t1~~evgtrinLocDN63128c1g1t1.p1	7.55997	2.36983	0.00142231	0.046523	evgtrinLocDN63128c1g1t1.p1	Uncharacterized protein 259R [Exaiptasia pallida]	0.45	NA	NA	NA	NA	NA
GENE.evgHyS_ScswcV5_4270.g19870.t1~~evgHyS_ScswcV5_4270.g19870.t1.p1	3.65045	1.14492	0.00143067	0.0466206	NA	NA	NA	NA	NA	NA	NA	NA
GENE.evgtrinLocDN7932c0g1t13~~evgtrinLocDN7932c0g1t13.p2	4.38338	1.37517	0.00143497	0.046673	evgtrinLocDN7932c0g1t13.p2	PREDICTED: calcium-dependent protein kinase 19-like [Hydra vulgaris]	5.18e-51	NA	NA	NA	NA	NA
GENE.evgtrinLocDN5528c3g3t1~~evgtrinLocDN5528c3g3t1.p1	7.09998	2.22783	0.00143781	0.0466778	evgtrinLocDN5528c3g3t1.p1	PREDICTED: octopamine receptor beta-1R-like, partial [Hydra vulgaris]	4.4e-66	NA	NA	NA	NA	NA
GENE.evgHyS_ScswcV5_1325.g4810.t1~~evgHyS_ScswcV5_1325.g4810.t1.p1	5.92692	1.86165	0.00145406	0.0469416	evgHyS_ScswcV5_1325.g4810.t1.p1	PREDICTED: uncharacterized protein LOC100200284 [Hydra vulgaris]	1.51e-16	NA	NA	NA	NA	NA
GENE.evgHyS_ScswcV5_1219.g4427.t1~~evgHyS_ScswcV5_1219.g4427.t1.p1	6.63613	2.08481	0.00145712	0.0469528	evgHyS_ScswcV5_1219.g4427.t1.p1	uncharacterized protein LOC110987973 [Acanthaster planci]	6.56e-24	NA	NA	NA	NA	NA
GENE.evgtrinLocDN8258c0g4t1~~evgtrinLocDN8258c0g4t1.p1	7.45464	2.3441	0.00147186	0.0472522	NA	NA	NA	NA	NA	NA	NA	NA
GENE.evgtrinLocDN2809c1g1t9~~evgtrinLocDN2809c1g1t9.p1	4.15984	1.3087	0.00147987	0.0474216	evgtrinLocDN2809c1g1t9.p1	E3 ubiquitin-protein ligase DZIP3 [Exaiptasia pallida]	0.000394	NA	NA	NA	NA	NA
GENE.evgtrinLocDN4214c0g1t2~~evgtrinLocDN4214c0g1t2.p2	6.33597	1.99513	0.00149464	0.0477817	evgtrinLocDN4214c0g1t2.p2	PREDICTED: uncharacterized protein LOC107354266 [Acropora digitifera]	5.32e-23	NA	NA	NA	NA	NA
GENE.evgtrinLocDN5813c0g3t6~~evgtrinLocDN5813c0g3t6.p1	3.83707	1.2084	0.00149662	0.0477817	evgtrinLocDN5813c0g3t6.p1	PREDICTED: uncharacterized protein LOC105849422, partial [Hydra vulgaris]	4.44e-34	NA	NA	NA	NA	NA
GENE.evgHyS_ScswcV5_2707.g11197.t1~~evgHyS_ScswcV5_2707.g11197.t1.p1	2.02371	0.637628	0.00150448	0.0479442	evgHyS_ScswcV5_2707.g11197.t1.p1	PREDICTED: alpha-enolase-like [Hydra vulgaris]	0	Phosphopyruvate hydratase	NA	phosphopyruvate hydratase activity	glycolytic process	phosphopyruvate hydratase complex
GENE.evgtrinLocDN19296c1g1t2~~evgtrinLocDN19296c1g1t2.p1	7.1938	2.27406	0.00155931	0.0492334	evgtrinLocDN19296c1g1t2.p1	hypothetical protein OIDMADRAFT_21532 [Oidiodendron maius Zn]	0.68	NA	NA	NA	NA	NA
GENE.evgHyS_ScswcV5_664.g2734.t1~~evgHyS_ScswcV5_664.g2734.t1.p1	6.27594	1.98416	0.00156138	0.0492334	evgHyS_ScswcV5_664.g2734.t1.p1	PREDICTED: transmembrane protein 104-like isoform X2 [Hydra vulgaris]	0	Transmembrane protein 104	TMEM104	NA	NA	integral component of membrane
GENE.evgtrinLocDN2727c0g1t7~~evgtrinLocDN2727c0g1t7.p1	4.7138	1.49269	0.00158902	0.0498143	evgtrinLocDN2727c0g1t7.p1	PREDICTED: protoheme IX farnesyltransferase, mitochondrial-like [Hydra vulgaris]	7.65e-133	Protoheme IX farnesyltransferase, mitochondrial	NA	protoheme IX farnesyltransferase activity	heme o metabolic process	mitochondrial membrane
GENE.evgHyS_ScswcV5_3796.g16400.t1~~evgHyS_ScswcV5_3796.g16400.t1.p1	2.25585	0.714719	0.00159795	0.0500038	evgHyS_ScswcV5_3796.g16400.t1.p1	PREDICTED: flagellar calcium-binding protein-like [Hydra vulgaris]	2.79e-85	Flagellar calcium-binding protein	FCA1	calcium ion binding	NA	motile cilium
GENE.evgMSTRG.7385.2~~evgMSTRG.7385.2.p1	7.09681	2.25233	0.00162781	0.0508385	evgMSTRG.7385.2.p1	PREDICTED: uncharacterized protein LOC106874873 [Octopus bimaculoides]	5.9e-08	NA	NA	NA	NA	NA
GENE.evgMSTRG.87630.1~~evgMSTRG.87630.1.p1	7.35302	2.33493	0.00163754	0.0508753	evgMSTRG.87630.1.p1	Uncharacterized protein 259R [Exaiptasia pallida]	8.12e-13	NA	NA	NA	NA	NA
GENE.evgHyS_ScswcV5_2556.g10571.t1~~evgHyS_ScswcV5_2556.g10571.t1.p1	4.77269	1.51975	0.00168697	0.0519627	evgHyS_ScswcV5_2556.g10571.t1.p1	PREDICTED: galanin receptor type 1-like isoform X2 [Hydra vulgaris]	4.24e-108	Prolactin-releasing peptide receptor	NA	somatostatin receptor activity	somatostatin receptor signaling pathway	integral component of plasma membrane
GENE.evgtrinLocDN5173c3g2t1~~evgtrinLocDN5173c3g2t1.p2	5.3469	1.70265	0.00168753	0.0519627	evgtrinLocDN5173c3g2t1.p2	Glutamate synthase [NADPH] large chain, partial [Alphaproteobacteria bacterium MarineAlpha6_Bin6]	0.62	NA	NA	NA	NA	NA
GENE.evgtrinLocDN4293c0g1t1~~evgtrinLocDN4293c0g1t1.p1	6.11267	1.94731	0.0016951	0.0520323	evgtrinLocDN4293c0g1t1.p1	PREDICTED: dynein heavy chain 6, axonemal [Lepisosteus oculatus]	3.3	NA	NA	NA	NA	NA
GENE.evgtrinLocDN5071c0g1t9~~evgtrinLocDN5071c0g1t9.p1	5.76836	1.83936	0.00171231	0.0523537	NA	NA	NA	NA	NA	NA	NA	NA
GENE.evgMSTRG.120095.1~~evgMSTRG.120095.1.p1	6.13685	1.96277	0.00176826	0.0536857	evgMSTRG.120095.1.p1	hypothetical protein pdam_00023496 [Pocillopora damicornis]	1.49e-07	NA	NA	NA	NA	NA
GENE.evgMSTRG.93263.1~~evgMSTRG.93263.1.p1	2.61999	0.839693	0.00180739	0.0543973	evgMSTRG.93263.1.p1	O-antigen ligase domain-containing protein [Winogradskyella tangerina]	2.3	NA	NA	NA	NA	NA
GENE.evgtrinLocDN126047c0g1t13~~evgtrinLocDN126047c0g1t13.p1	7.28317	2.33666	0.00182759	0.054903	evgtrinLocDN126047c0g1t13.p1	acetoin dehydrogenase TPP-dependent, E1component subunit alpha [Streptococcus troglodytae]	0.23	NA	NA	NA	NA	NA
GENE.evgHyS_ScswcV5_644.g2295.t1~~evgHyS_ScswcV5_644.g2295.t1.p1	6.00634	1.93218	0.00187991	0.0559006	evgHyS_ScswcV5_644.g2295.t1.p1	solute carrier family 23 member 2-like isoform X1 [Orbicella faveolata]	0	Xanthine permease	LOC103524188	L-ascorbate:sodium symporter activity	L-ascorbic acid transmembrane transport	basal plasma membrane
GENE.evgtrinLocDN127388c1g1t1~~evgtrinLocDN127388c1g1t1.p1	5.74378	1.85034	0.00190809	0.0565446	evgtrinLocDN127388c1g1t1.p1	Uncharacterized protein 259R [Exaiptasia pallida]	3.93e-15	NA	NA	NA	NA	NA
GENE.evgHyS_ScswcV5_3470.g14473.t1~~evgHyS_ScswcV5_3470.g14473.t1.p1	2.76155	0.889884	0.00191397	0.0566221	evgHyS_ScswcV5_3470.g14473.t1.p1	BRISC and BRCA1-A complex member 2-like [Crassostrea virginica]	5.12e-53	NA	NA	NA	NA	NA
GENE.evgtrinLocDN14320c1g1t2~~evgtrinLocDN14320c1g1t2.p1	4.41712	1.42551	0.00194424	0.0574179	evgtrinLocDN14320c1g1t2.p1	PREDICTED: uncharacterized protein LOC105848913, partial [Hydra vulgaris]	0	ATP-dependent DNA helicase	NA	DNA helicase activity	telomere maintenance	membrane coat
GENE.evgHyS_ScswcV5_662.g2604.t1~~evgHyS_ScswcV5_662.g2604.t1.p1	4.85145	1.56593	0.00194749	0.0574179	evgHyS_ScswcV5_662.g2604.t1.p1	PREDICTED: proton-coupled folate transporter-like [Hydra vulgaris]	4.29e-68	NA	NA	NA	NA	NA
GENE.evgHyS_ScswcV5_644.g2192.t1~~evgHyS_ScswcV5_644.g2192.t1.p1	2.65779	0.858129	0.00195364	0.0575013	evgHyS_ScswcV5_644.g2192.t1.p1	glutamate receptor ionotropic, NMDA 1-like [Pocillopora damicornis]	8.46e-56	NA	NA	NA	NA	NA
GENE.evgHyS_ScswcV5_1783.g7283.t1~~evgHyS_ScswcV5_1783.g7283.t1.p1	5.0142	1.61937	0.00195888	0.0575578	evgHyS_ScswcV5_1783.g7283.t1.p1	PREDICTED: calmodulin-like [Hydra vulgaris]	4.57e-68	Calcium ion binding, calmodulin	CAL-1	calcium ion binding	calcium-mediated signaling	non-motile cilium
GENE.evgMSTRG.130385.5~~evgMSTRG.130385.5.p1	2.77959	0.89791	0.00196402	0.0576114	evgMSTRG.130385.5.p1	hypothetical protein PCANC_28783 [Puccinia coronata var. avenae f. sp. avenae]	6.74e-12	NA	NA	NA	NA	NA
GENE.evgtrinLocDN21564c0g2t8~~evgtrinLocDN21564c0g2t8.p1	3.38907	1.09831	0.00203076	0.0591421	evgtrinLocDN21564c0g2t8.p1	THAP domain-containing protein 2 [Exaiptasia pallida]	2.1e-18	NA	NA	NA	NA	NA
GENE.evgMSTRG.53162.1~~evgMSTRG.53162.1.p1	7.51177	2.43467	0.00203327	0.0591421	evgMSTRG.53162.1.p1	uncharacterized protein LOC111691573 [Anoplophora glabripennis]	1e-26	Gastrula zinc finger protein xlcgf46.1: PROVISIONAL	NA	DNA-directed DNA polymerase activity	DNA biosynthetic process	NA
GENE.evgMSTRG.104490.1~~evgMSTRG.104490.1.p1	2.68	0.870085	0.00206894	0.0598783	evgMSTRG.104490.1.p1	PREDICTED: tRNA (cytosine(34)-C(5))-methyltransferase-like [Hydra vulgaris]	0	S-adenosyl-L-methionine-dependent methyltransferase	NSUN2	tRNA (cytosine-5-)-methyltransferase activity	tRNA methylation	nucleus
GENE.evgHyS_ScswcV5_366.g1369.t1~~evgHyS_ScswcV5_366.g1369.t1.p1	3.50418	1.14051	0.0021229	0.0612356	evgHyS_ScswcV5_366.g1369.t1.p1	PREDICTED: ADP-ribosylation factor-like protein 3 [Hydra vulgaris]	5.18e-61	NA	NA	NA	NA	NA
GENE.evgtrinLocDN206628c0g1t11~~evgtrinLocDN206628c0g1t11.p1	6.75847	2.20368	0.00216289	0.0622854	evgtrinLocDN206628c0g1t11.p1	ATP-dependent DNA helicase PcrA, partial [Corynebacterium bovis]	1.6	NA	NA	NA	NA	NA
GENE.evgtrinLocDN6528c0g1t1~~evgtrinLocDN6528c0g1t1.p1	7.43271	2.42524	0.00217863	0.0626294	evgtrinLocDN6528c0g1t1.p1	hypothetical protein [Promicromonosporaceae bacterium W15]	5.8	NA	NA	NA	NA	NA
GENE.evgHyS_ScswcV5_3493.g15095.t1~~evgHyS_ScswcV5_3493.g15095.t1.p1	5.97871	1.95571	0.00223522	0.0636936	evgHyS_ScswcV5_3493.g15095.t1.p1	PREDICTED: LOW QUALITY PROTEIN: uncharacterized protein LOC105846371 [Hydra vulgaris]	5.72e-59	NA	NA	NA	NA	NA
GENE.evgMSTRG.68041.1~~evgMSTRG.68041.1.p1	7.32098	2.39512	0.00223847	0.0636936	evgMSTRG.68041.1.p1	hypothetical protein CAPTEDRAFT_197639 [Capitella teleta]	4.08e-09	NA	NA	NA	NA	NA
GENE.evgMSTRG.2333.1~~evgMSTRG.2333.1.p1	3.94844	1.29192	0.00224118	0.0636936	evgMSTRG.2333.1.p1	PREDICTED: cAMP-dependent protein kinase type II regulatory subunit-like isoform X1 [Hydra vulgaris]	1.94e-148	cAMP-dependent protein kinase type II-alpha regulatory subunit	NA	cAMP-dependent protein kinase regulator activity	regulation of protein kinase activity	cAMP-dependent protein kinase complex
GENE.evgtrinLocDN43205c0g1t19~~evgtrinLocDN43205c0g1t19.p1	7.34466	2.40931	0.00230026	0.0650528	evgtrinLocDN43205c0g1t19.p1	hypothetical protein BSL78_04678 [Apostichopus japonicus]	1.8	NA	NA	NA	NA	NA
GENE.evgtrinLocDN24597c0g2t3~~evgtrinLocDN24597c0g2t3.p1	6.59498	2.16431	0.00231023	0.0652283	evgtrinLocDN24597c0g2t3.p1	Hypothetical protein PACV_51 [Pacmanvirus A23]	4.77e-40	NA	NA	NA	NA	NA
GENE.evgHyS_ScswcV5_2966.g11694.t1~~evgHyS_ScswcV5_2966.g11694.t1.p1	3.60691	1.18588	0.00235367	0.0661317	evgHyS_ScswcV5_2966.g11694.t1.p1	alpha-2-macroglobulin [Diadumene lineata]	0	Gov platelet alloantigens	NA	endopeptidase inhibitor activity	negative regulation of endopeptidase activity	extracellular space
GENE.evgHyS_ScswcV5_4270.g20125.t1~~evgHyS_ScswcV5_4270.g20125.t1.p1	6.89317	2.26734	0.00236425	0.0661722	evgHyS_ScswcV5_4270.g20125.t1.p1	PREDICTED: high choriolytic enzyme 2-like [Hydra vulgaris]	1.45e-47	Metalloendopeptidase	NA	metalloendopeptidase activity	proteolysis	meprin A complex
GENE.evgMSTRG.84048.1~~evgMSTRG.84048.1.p1	3.87367	1.27428	0.00236658	0.0661722	evgMSTRG.84048.1.p1	hypothetical protein CAPTEDRAFT_197639 [Capitella teleta]	4.23e-73	NA	NA	NA	NA	NA
GENE.evgMSTRG.44156.3~~evgMSTRG.44156.3.p1	7.83743	2.5786	0.00237038	0.0661722	evgMSTRG.44156.3.p1	phospholipid carrier-dependent glycosyltransferase [Lachnospiraceae bacterium JC7]	7	NA	NA	NA	NA	NA
GENE.evgHyS_ScswcV5_2988.g11789.t1~~evgHyS_ScswcV5_2988.g11789.t1.p1	5.08217	1.67482	0.00240974	0.0668651	evgHyS_ScswcV5_2988.g11789.t1.p1	ras-related protein Rab-11B-like [Exaiptasia pallida]	7.28e-99	Putative small GTPase superfamily, P-loop containing nucleoside triphosphate hydrolase	NA	GTPase activity	positive regulation of ascospore-type prospore membrane assembly	meiotic spindle pole
GENE.evgMSTRG.101732.1~~evgMSTRG.101732.1.p1	8.16819	2.69192	0.00241063	0.0668651	evgMSTRG.101732.1.p1	acyl-CoA synthetase [Oblitimonas alkaliphila]	5.9	NA	NA	NA	NA	NA
GENE.evgHyS_ScswcV5_2556.g10320.t1~~evgHyS_ScswcV5_2556.g10320.t1.p1	5.18015	1.70777	0.00241902	0.0669907	evgHyS_ScswcV5_2556.g10320.t1.p1	PREDICTED: uncharacterized protein LOC100213080 [Hydra vulgaris]	9.27e-05	NA	NA	NA	NA	NA
GENE.evgHyS_ScswcV5_644.g2235.t1~~evgHyS_ScswcV5_644.g2235.t1.p1	3.77333	1.24433	0.00242607	0.0670008	evgHyS_ScswcV5_644.g2235.t1.p1	PREDICTED: pyridine nucleotide-disulfide oxidoreductase domain-containing protein 1-like isoform X1 [Hydra vulgaris]	4.25e-149	Pyridine nucleotide-disulfide oxidoreductase domain-containing protein 1	PYROXD1	oxidoreductase activity	oxidation-reduction process	sarcomere
GENE.evgtrinLocDN5676c0g1t3~~evgtrinLocDN5676c0g1t3.p1	3.61067	1.19074	0.00242712	0.0670008	evgtrinLocDN5676c0g1t3.p1	RNA-directed DNA polymerase from mobile element jockey [Stylophora pistillata]	0.002	NA	NA	NA	NA	NA
GENE.evgHyS_ScswcV5_1000.g3990.t1~~evgHyS_ScswcV5_1000.g3990.t1.p1	6.6315	2.19048	0.00246656	0.0674642	evgHyS_ScswcV5_1000.g3990.t1.p1	PREDICTED: glycosaminoglycan xylosylkinase-like [Hydra vulgaris]	1.41e-155	Glycosaminoglycan xylosylkinase	FAM20B	transferase activity, transferring phosphorus-containing groups	phosphorylation	Golgi apparatus
GENE.evgHyS_ScswcV5_410.g1553.t1~~evgHyS_ScswcV5_410.g1553.t1.p1	3.88765	1.28419	0.00246725	0.0674642	evgHyS_ScswcV5_410.g1553.t1.p1	Cnox-2 [Hydractinia symbiolongicarpus]	9.05e-168	Homeodomain transcription factor protein GSX	NA	sequence-specific DNA binding	regulation of transcription, DNA-templated	nucleus
GENE.evgtrinLocDN8220c0g1t3~~evgtrinLocDN8220c0g1t3.p1	4.63658	1.53193	0.00247294	0.0675132	evgtrinLocDN8220c0g1t3.p1	PREDICTED: uncharacterized protein LOC101241578 [Hydra vulgaris]	9.93e-67	NA	NA	NA	NA	NA
GENE.evgHyS_ScswcV5_4378.g20667.t1~~evgHyS_ScswcV5_4378.g20667.t1.p1	2.5962	0.858243	0.00248618	0.0675555	evgHyS_ScswcV5_4378.g20667.t1.p1	zinc finger protein 277-like [Orbicella faveolata]	1.57e-117	Phosphatase and actin regulator	ZNF277	nucleic acid binding	regulation of cellular senescence	nucleus
GENE.evgMSTRG.14402.8~~evgMSTRG.14402.8.p1	4.23822	1.40593	0.0025738	0.0695007	evgMSTRG.14402.8.p1	predicted protein [Nematostella vectensis]	1.27e-13	NA	NA	NA	NA	NA
GENE.evgMSTRG.41806.1~~evgMSTRG.41806.1.p1	4.14631	1.37725	0.00260756	0.0700848	evgMSTRG.41806.1.p1	hypothetical protein LSTR_LSTR000483 [Laodelphax striatella]	0.22	NA	NA	NA	NA	NA
GENE.evgHyS_ScswcV5_1000.g4022.t1~~evgHyS_ScswcV5_1000.g4022.t1.p1	6.81951	2.26957	0.00265792	0.0711076	evgHyS_ScswcV5_1000.g4022.t1.p1	PREDICTED: testis-specific serine/threonine-protein kinase 3-like [Acropora digitifera]	2.16e-89	Testis-specific serine threonine-protein kinase 2	NA	protein serine/threonine kinase activity	protein phosphorylation	nucleus
GENE.evgtrinLocDN119137c0g4t1~~evgtrinLocDN119137c0g4t1.p1	8.37093	2.78916	0.00268882	0.0716439	evgtrinLocDN119137c0g4t1.p1	hypothetical protein AC249_AIPGENE9596 [Exaiptasia pallida]	1.43e-09	NA	NA	NA	NA	NA
GENE.evgHyS_ScswcV5_644.g2134.t1~~evgHyS_ScswcV5_644.g2134.t1.p1	2.40589	0.801677	0.00269036	0.0716439	evgHyS_ScswcV5_644.g2134.t1.p1	PREDICTED: uncharacterized protein LOC100203952 [Hydra vulgaris]	0	Limb development membrane protein 1-like	LMBR1L	transmembrane signaling receptor activity	receptor-mediated endocytosis	integral component of plasma membrane
GENE.evgtrinLocDN11324c0g2t1~~evgtrinLocDN11324c0g2t1.p1	6.09092	2.0302	0.00269838	0.0716939	NA	NA	NA	NA	NA	NA	NA	NA
GENE.evgHyS_ScswcV5_807.g3660.t1~~evgHyS_ScswcV5_807.g3660.t1.p1	2.21805	0.739422	0.00270242	0.0716939	evgHyS_ScswcV5_807.g3660.t1.p1	PREDICTED: aminomethyltransferase, mitochondrial-like [Hydra vulgaris]	0	Aminomethyltransferase	AMT	aminomethyltransferase activity	glycine catabolic process	mitochondrion
GENE.evgHyS_ScswcV5_3796.g16394.t1~~evgHyS_ScswcV5_3796.g16394.t1.p1	4.92166	1.64136	0.00271292	0.0716939	evgHyS_ScswcV5_3796.g16394.t1.p1	PREDICTED: uncharacterized protein LOC100214047 [Hydra vulgaris]	2.16e-13	NA	NA	NA	NA	NA
GENE.evgMSTRG.105893.1~~evgMSTRG.105893.1.p1	4.79397	1.60078	0.00274647	0.0720729	evgMSTRG.105893.1.p1	SAP-like protein BP-73 [Aegilops tauschii subsp. tauschii]	0.035	NA	NA	NA	NA	NA
GENE.evgtrinLocDN13091c0g1t17~~evgtrinLocDN13091c0g1t17.p1	4.73407	1.5809	0.00274853	0.0720729	evgtrinLocDN13091c0g1t17.p1	hypothetical protein AC249_AIPGENE9909 [Exaiptasia pallida]	4.07e-14	NA	NA	NA	NA	NA
GENE.evgHyS_ScswcV5_4931.g22011.t1~~evgHyS_ScswcV5_4931.g22011.t1.p1	2.85263	0.954071	0.00279014	0.072669	evgHyS_ScswcV5_4931.g22011.t1.p1	PREDICTED: ribosomal L1 domain-containing protein 1-like [Hydra vulgaris]	3.9e-80	Ribosomal L1 domain-containing protein 1	NA	NA	NA	ribosome
GENE.evgHyS_ScswcV5_3241.g13059.t1~~evgHyS_ScswcV5_3241.g13059.t1.p1	4.33151	1.44921	0.00280007	0.0727766	evgHyS_ScswcV5_3241.g13059.t1.p1	PREDICTED: ankycorbin-like isoform X1 [Hydra vulgaris]	9.85e-84	Uveal autoantigen with coiled-coil domains and ankyrin repeats	NA	RNA binding	regulation of NIK/NF-kappaB signaling	apicoplast
GENE.evgtrinLocDN40769c0g1t1~~evgtrinLocDN40769c0g1t1.p1	6.09834	2.04295	0.00283518	0.0734688	evgtrinLocDN40769c0g1t1.p1	uncharacterized protein LOC111324868 [Stylophora pistillata]	3.61e-07	NA	NA	NA	NA	NA
GENE.evgHyS_ScswcV5_3896.g17248.t1~~evgHyS_ScswcV5_3896.g17248.t1.p1	1.73864	0.582721	0.00284826	0.0736476	evgHyS_ScswcV5_3896.g17248.t1.p1	PREDICTED: failed axon connections homolog [Hydra vulgaris]	9.59e-107	Failed axon connections	FAXC	NA	NA	integral component of membrane
GENE.evgtrinLocDN39111c0g1t15~~evgtrinLocDN39111c0g1t15.p1	2.36604	0.793146	0.00285339	0.0736476	evgtrinLocDN39111c0g1t15.p1	LOW QUALITY PROTEIN: structural maintenance of chromosomes protein 3, partial [Rhincodon typus]	8.9	NA	NA	NA	NA	NA
GENE.evgHyS_ScswcV5_3964.g17486.t1~~evgHyS_ScswcV5_3964.g17486.t1.p1	6.51925	2.1855	0.00285482	0.0736476	evgHyS_ScswcV5_3964.g17486.t1.p1	Homeobox protein slou-like protein [Leptotrombidium deliense]	5.89e-32	Homeobox protein slou	NA	sequence-specific DNA binding	regulation of transcription, DNA-templated	nucleus
GENE.evgHyS_ScswcV5_2604.g10771.t1~~evgHyS_ScswcV5_2604.g10771.t1.p1	5.20081	1.74476	0.00287482	0.073834	evgHyS_ScswcV5_2604.g10771.t1.p1	neuronal acetylcholine receptor subunit alpha-4-like [Pocillopora damicornis]	1.34e-143	Nicotinic acetylcholine receptor invertebrate	NA	acetylcholine-gated cation-selective channel activity	excitatory postsynaptic potential	postsynaptic membrane
GENE.evgtrinLocDN19196c2g1t6~~evgtrinLocDN19196c2g1t6.p1	6.8269	2.29121	0.00288619	0.0739975	evgtrinLocDN19196c2g1t6.p1	PREDICTED: uncharacterized protein LOC107333563 [Acropora digitifera]	2.16e-17	NA	NA	NA	NA	NA
GENE.evgMSTRG.119578.1~~evgMSTRG.119578.1.p1	6.43106	2.15921	0.00289731	0.0739975	evgMSTRG.119578.1.p1	response regulator transcription factor [Actinotignum urinale]	7.4	NA	NA	NA	NA	NA
GENE.evgHyS_ScswcV5_2556.g10244.t1~~evgHyS_ScswcV5_2556.g10244.t1.p1	2.96367	0.995078	0.00289826	0.0739975	evgHyS_ScswcV5_2556.g10244.t1.p1	eyes absent [Cladonema radiatum]	0	Eyes absent homolog	EYA2	protein tyrosine phosphatase activity	sensory perception of sound	nucleus
GENE.evgHyS_ScswcV5_3470.g14514.t1~~evgHyS_ScswcV5_3470.g14514.t1.p1	4.11855	1.38392	0.00292039	0.0742422	evgHyS_ScswcV5_3470.g14514.t1.p1	PREDICTED: tetratricopeptide repeat protein 8-like [Hydra vulgaris]	0	tetratricopeptide repeat protein 8	TTC8	RNA polymerase II repressing transcription factor binding	non-motile cilium assembly	BBSome
GENE.evgMSTRG.82962.4~~evgMSTRG.82962.4.p1	3.87417	1.30182	0.0029207	0.0742422	evgMSTRG.82962.4.p1	hypothetical protein T265_13535 [Opisthorchis viverrini]	0.012	Unclassified	NA	NA	NA	NA
GENE.evgMSTRG.61400.7~~evgMSTRG.61400.7.p2	4.06985	1.36861	0.0029422	0.0744672	evgMSTRG.61400.7.p2	alpha-glucan family phosphorylase [[Flexibacter] sp. ATCC 35208]	0.29	NA	NA	NA	NA	NA
GENE.evgHyS_ScswcV5_20.g130.t1~~evgHyS_ScswcV5_20.g130.t1.p1	4.21813	1.41848	0.00294243	0.0744672	evgHyS_ScswcV5_20.g130.t1.p1	collagen alpha-1(VII) chain [Salvelinus alpinus]	1.48e-13	Collagen alpha-1(X) chain	COL10A1	extracellular matrix structural constituent	extracellular matrix organization	collagen trimer
GENE.evgtrinLocDN2824c2g1t3~~evgtrinLocDN2824c2g1t3.p1	2.64569	0.890451	0.00296658	0.0747638	NA	NA	NA	NA	NA	NA	NA	NA
GENE.evgHyS_ScswcV5_2427.g9065.t1~~evgHyS_ScswcV5_2427.g9065.t1.p1	4.34337	1.4629	0.00298749	0.0748958	evgHyS_ScswcV5_2427.g9065.t1.p1	tRNA (guanine(26)-N(2))-dimethyltransferase-like [Pocillopora damicornis]	0	tRNA methyltransferase 1	TRMT1	tRNA (guanine-N2-)-methyltransferase activity	tRNA methylation	nucleus
GENE.evgHyS_ScswcV5_2461.g9658.t1~~evgHyS_ScswcV5_2461.g9658.t1.p1	4.08739	1.37676	0.00298914	0.0748958	evgHyS_ScswcV5_2461.g9658.t1.p1	peptidyl-prolyl cis-trans isomerase NIMA-interacting 1-like [Pocillopora damicornis]	9.9e-80	Peptidyl-prolyl cis-trans isomerase	PIN1	peptidyl-prolyl cis-trans isomerase activity	protein peptidyl-prolyl isomerization	postsynaptic cytosol
GENE.evgHyS_ScswcV5_1188.g4299.t1~~evgHyS_ScswcV5_1188.g4299.t1.p1	5.70019	1.92059	0.00299799	0.0748958	evgHyS_ScswcV5_1188.g4299.t1.p1	PREDICTED: uncharacterized protein LOC100201344 [Hydra vulgaris]	5.26e-68	NA	NA	NA	NA	NA
GENE.evgMSTRG.10474.5~~evgMSTRG.10474.5.p1	2.62267	0.884097	0.00301209	0.0750254	evgMSTRG.10474.5.p1	PREDICTED: uncharacterized protein LOC100200691 [Hydra vulgaris]	5.2e-57	Putative cnidarian restricted protein	NA	NA	NA	NA
GENE.evgHyS_ScswcV5_1336.g5075.t1~~evgHyS_ScswcV5_1336.g5075.t1.p1	6.41875	2.16537	0.00303403	0.0752638	evgHyS_ScswcV5_1336.g5075.t1.p1	zinc metalloproteinase nas-4-like isoform X2 [Orbicella faveolata]	3.15e-62	Metalloendopeptidase	NA	metalloendopeptidase activity	proteolysis	cortical granule
GENE.evgMSTRG.74119.1~~evgMSTRG.74119.1.p1	7.71128	2.60282	0.00304991	0.0752704	evgMSTRG.74119.1.p1	uncharacterized protein LOC111318931 [Stylophora pistillata]	1.96e-38	NA	NA	NA	NA	NA
GENE.evgHyS_ScswcV5_3574.g15632.t1~~evgHyS_ScswcV5_3574.g15632.t1.p1	3.06945	1.03872	0.00312646	0.0766326	evgHyS_ScswcV5_3574.g15632.t1.p1	PREDICTED: DNA topoisomerase 2-alpha isoform X1 [Hydra vulgaris]	0	DNA topoisomerase II alpha	TOP2A	DNA topoisomerase type II (ATP-hydrolyzing) activity	DNA topological change	viral integration complex
GENE.evgtrinLocDN10832c0g1t5~~evgtrinLocDN10832c0g1t5.p1	8.20606	2.77729	0.00312967	0.0766326	evgtrinLocDN10832c0g1t5.p1	PREDICTED: uncharacterized protein LOC105846090 [Hydra vulgaris]	9.13e-06	NA	NA	NA	NA	NA
GENE.evgtrinLocDN12198c0g1t18~~evgtrinLocDN12198c0g1t18.p1	2.34671	0.794532	0.00314109	0.0767268	evgtrinLocDN12198c0g1t18.p1	PREDICTED: inhibitor of growth protein 4-like, partial [Hydra vulgaris]	1.11e-98	Inhibitor of growth protein 4	ING4	methylation-dependent protein binding	negative regulation of cell population proliferation	nucleus
GENE.evgMSTRG.8671.1~~evgMSTRG.8671.1.p1	5.9925	2.02898	0.00314236	0.0767268	evgMSTRG.8671.1.p1	predicted protein [Nematostella vectensis]	1.61e-67	Chromodomain protein	NA	nucleic acid binding	DNA integration	nucleus
GENE.evgMSTRG.132837.1~~evgMSTRG.132837.1.p1	8.09404	2.7416	0.00315415	0.0767982	evgMSTRG.132837.1.p1	hypothetical protein CAPTEDRAFT_213860 [Capitella teleta]	1.63e-08	NA	NA	NA	NA	NA
GENE.evgHyS_ScswcV5_1748.g6536.t1~~evgHyS_ScswcV5_1748.g6536.t1.p1	8.05135	2.72906	0.00317543	0.0770998	evgHyS_ScswcV5_1748.g6536.t1.p1	uncharacterized protein LOC113671947 [Pocillopora damicornis]	4.5e-08	NA	NA	NA	NA	NA
GENE.evgtrinLocDN27060c0g1t4~~evgtrinLocDN27060c0g1t4.p1	5.35861	1.81827	0.0032078	0.0775597	NA	NA	NA	NA	NA	NA	NA	NA
GENE.evgHyS_ScswcV5_1907.g7769.t1~~evgHyS_ScswcV5_1907.g7769.t1.p1	5.00288	1.69883	0.00323051	0.0778917	evgHyS_ScswcV5_1907.g7769.t1.p1	uncharacterized protein LOC110234356 [Exaiptasia pallida]	0	NA	NA	NA	NA	NA
GENE.evgtrinLocDN12304c0g2t3~~evgtrinLocDN12304c0g2t3.p1	4.55007	1.54706	0.00327033	0.0784155	evgtrinLocDN12304c0g2t3.p1	3-dehydroquinate synthase [Pseudanabaena sp. PCC 7367]	6.2	NA	NA	NA	NA	NA
GENE.evgtrinLocDN6708c1g1t4~~evgtrinLocDN6708c1g1t4.p1	2.91828	0.996887	0.00341813	0.0813966	evgtrinLocDN6708c1g1t4.p1	predicted protein [Nematostella vectensis]	2.29e-21	NA	NA	NA	NA	NA
GENE.evgHyS_ScswcV5_644.g2073.t1~~evgHyS_ScswcV5_644.g2073.t1.p1	7.77956	2.65819	0.00342649	0.0814836	evgHyS_ScswcV5_644.g2073.t1.p1	hypothetical protein OJAV_G00068070 [Oryzias javanicus]	0.53	Beta antigen	NA	structural constituent of cuticle	extracellular matrix organization	collagen trimer
GENE.evgtrinLocDN8186c1g1t2~~evgtrinLocDN8186c1g1t2.p1	5.6962	1.95082	0.00350149	0.0825875	evgtrinLocDN8186c1g1t2.p1	predicted protein [Nematostella vectensis]	2.39e-09	NA	NA	NA	NA	NA
GENE.evgMSTRG.97815.6~~evgMSTRG.97815.6.p1	2.26427	0.775785	0.00351512	0.0826997	evgMSTRG.97815.6.p1	PREDICTED: synaptotagmin-16-like isoform X1 [Hydra vulgaris]	0	Synaptotagmin-16	NA	structural constituent of nuclear pore	exocytosis	integral component of membrane
GENE.evgtrinLocDN24522c0g1t1~~evgtrinLocDN24522c0g1t1.p1	8.04145	2.75849	0.00355496	0.0830897	evgtrinLocDN24522c0g1t1.p1	DUF3015 domain-containing protein [Alcanivorax sp. DG881]	4.44e-111	NA	NA	NA	NA	NA
GENE.evgMSTRG.92082.2~~evgMSTRG.92082.2.p1	5.22483	1.79703	0.00364361	0.0846479	evgMSTRG.92082.2.p1	PREDICTED: 28S ribosomal protein S16, mitochondrial-like [Hydra vulgaris]	3.44e-56	Mitochondrial ribosomal protein S16	MRPS16	structural constituent of ribosome	translation	ribosome
GENE.evgHyS_ScswcV5_4075.g18533.t1~~evgHyS_ScswcV5_4075.g18533.t1.p1	5.74601	1.97651	0.00364744	0.0846479	evgHyS_ScswcV5_4075.g18533.t1.p1	metabotropic glutamate receptor 7 isoform X9 [Microcebus murinus]	3.92e-18	NA	NA	NA	NA	NA
GENE.evgtrinLocDN29591c0g1t5~~evgtrinLocDN29591c0g1t5.p1	3.43806	1.18508	0.00371818	0.08583	evgtrinLocDN29591c0g1t5.p1	PREDICTED: uncharacterized protein LOC101239543 isoform X1 [Hydra vulgaris]	4.86e-21	NA	NA	NA	NA	NA
GENE.evgMSTRG.44214.1~~evgMSTRG.44214.1.p1	5.33886	1.8424	0.00375819	0.0864085	evgMSTRG.44214.1.p1	predicted protein [Nematostella vectensis]	5.71e-36	Chromodomain protein	NA	nucleic acid binding	DNA integration	nucleus
GENE.evgtrinLocDN13511c0g1t7~~evgtrinLocDN13511c0g1t7.p2	4.48886	1.55016	0.00378255	0.0868534	evgtrinLocDN13511c0g1t7.p2	PREDICTED: uncharacterized protein LOC100208040 [Hydra vulgaris]	8.53e-05	NA	NA	NA	NA	NA
GENE.evgHyS_ScswcV5_4261.g19319.t1~~evgHyS_ScswcV5_4261.g19319.t1.p1	4.58009	1.58297	0.0038116	0.0870981	NA	NA	NA	NA	NA	NA	NA	NA
GENE.evgMSTRG.123231.1~~evgMSTRG.123231.1.p1	5.66499	1.95891	0.00382911	0.0873441	evgMSTRG.123231.1.p1	hypothetical protein EGW08_019819 [Elysia chlorotica]	9.47e-34	NA	NA	NA	NA	NA
GENE.evgtrinLocDN609c0g1t13~~evgtrinLocDN609c0g1t13.p1	3.36828	1.16663	0.00388707	0.0883175	NA	NA	NA	NA	NA	NA	NA	NA
GENE.evgtrinLocDN15718c1g1t18~~evgtrinLocDN15718c1g1t18.p1	4.75226	1.64708	0.00391093	0.0887432	evgtrinLocDN15718c1g1t18.p1	PREDICTED: ras-related protein Rab-23-like [Hydra vulgaris]	3.37e-93	RAB23, member RAS oncogene family	RAB23	GTPase activity	cellular defense response	autophagosome
GENE.evgtrinLocDN10454c0g1t1~~evgtrinLocDN10454c0g1t1.p1	5.74543	1.99474	0.00397302	0.0894032	evgtrinLocDN10454c0g1t1.p1	PREDICTED: uncharacterized protein LOC100201344 [Hydra vulgaris]	1.58e-46	NA	NA	NA	NA	NA
GENE.evgtrinLocDN51622c0g1t6~~evgtrinLocDN51622c0g1t6.p1	4.25024	1.4757	0.00397492	0.0894032	evgtrinLocDN51622c0g1t6.p1	PREDICTED: tyrosine-protein kinase transmembrane receptor Ror-like [Hydra vulgaris]	2.02e-54	NA	NA	NA	NA	NA
GENE.evgHyS_ScswcV5_1590.g5277.t1~~evgHyS_ScswcV5_1590.g5277.t1.p1	2.58733	0.898362	0.00397611	0.0894032	evgHyS_ScswcV5_1590.g5277.t1.p1	PREDICTED: bifunctional heparan sulfate N-deacetylase/N-sulfotransferase 4-like [Hydra vulgaris]	0	Bifunctional heparan sulfate n-deacetylase n-sulfotransferase 3	NA	[heparan sulfate]-glucosamine N-sulfotransferase activity	heparan sulfate proteoglycan biosynthetic process, polysaccharide chain biosynthetic process	integral component of membrane
GENE.evgtrinLocDN7349c0g1t13~~evgtrinLocDN7349c0g1t13.p1	3.34224	1.16141	0.00400546	0.0899416	evgtrinLocDN7349c0g1t13.p1	serine protease 1, partial [Aurelia aurita]	1e-89	Transmembrane serine protease 3	CTRL	serine-type endopeptidase activity	proteolysis	extracellular space
GENE.evgHyS_ScswcV5_4261.g19350.t1~~evgHyS_ScswcV5_4261.g19350.t1.p1	2.12155	0.737735	0.00403049	0.0901582	evgHyS_ScswcV5_4261.g19350.t1.p1	PREDICTED: mitofusin-2-like [Hydra vulgaris]	0	Transmembrane GTPase Marf	NA	GTPase activity	mitochondrial fusion	mitochondrial outer membrane
GENE.evgtrinLocDN56105c0g1t3~~evgtrinLocDN56105c0g1t3.p1	5.59518	1.94792	0.00407382	0.0905917	evgtrinLocDN56105c0g1t3.p1	insulin 3 [Deroceras reticulatum]	9.88e-06	NA	NA	NA	NA	NA
GENE.evgMSTRG.115425.2~~evgMSTRG.115425.2.p1	2.84927	0.992759	0.00410408	0.0906698	evgMSTRG.115425.2.p1	predicted protein [Nematostella vectensis]	0.023	NA	NA	NA	NA	NA
GENE.evgHyS_ScswcV5_290.g1138.t1~~evgHyS_ScswcV5_290.g1138.t1.p4	5.15662	1.79851	0.00414171	0.0909882	evgHyS_ScswcV5_290.g1138.t1.p4	Thr-Ser protein [Hyposoter didymator ichnovirus]	1.93e-12	NA	NA	NA	NA	NA
GENE.evgMSTRG.121475.2~~evgMSTRG.121475.2.p1	3.22719	1.12626	0.00416493	0.0911657	evgMSTRG.121475.2.p1	PREDICTED: TAR DNA-binding protein 43-like [Hydra vulgaris]	3.78e-140	Putative rna-binding protein musashi/mrna cleavage and polyadenylation factor i complex	TARDBP	RNA binding	3'-UTR-mediated mRNA stabilization	nucleoplasm
GENE.evgHyS_ScswcV5_457.g1850.t1~~evgHyS_ScswcV5_457.g1850.t1.p1	3.10502	1.08601	0.0042484	0.0926321	evgHyS_ScswcV5_457.g1850.t1.p1	PREDICTED: uncharacterized protein LOC105843661 [Hydra vulgaris]	1.08e-48	NA	NA	NA	NA	NA
GENE.evgtrinLocDN10032c2g1t1~~evgtrinLocDN10032c2g1t1.p1	7.31691	2.55949	0.0042533	0.0926321	evgtrinLocDN10032c2g1t1.p1	hypothetical protein DUI87_33295 [Hirundo rustica rustica]	1	NA	NA	NA	NA	NA
GENE.evgMSTRG.67202.1~~evgMSTRG.67202.1.p1	5.32156	1.86244	0.00427252	0.0929341	evgMSTRG.67202.1.p1	astacin 2 [Hydractinia echinata]	3.33e-89	Zinc metallo ase nas-4	NA	metalloendopeptidase activity	proteolysis	NA
GENE.evgHyS_ScswcV5_2556.g10542.t1~~evgHyS_ScswcV5_2556.g10542.t1.p1	5.81497	2.03555	0.00428051	0.0929912	evgHyS_ScswcV5_2556.g10542.t1.p1	PREDICTED: periodic tryptophan protein 1 homolog [Hydra vulgaris]	0	Periodic tryptophan protein 1	PWP1	endonuclease activity	rRNA processing	nucleus
GENE.evgtrinLocDN43876c0g1t2~~evgtrinLocDN43876c0g1t2.p1	7.50885	2.63142	0.00432352	0.0936538	evgtrinLocDN43876c0g1t2.p1	PREDICTED: uncharacterized protein LOC107330260 [Acropora digitifera]	4.08e-12	NA	NA	NA	NA	NA
GENE.evgtrinLocDN14675c1g1t13~~evgtrinLocDN14675c1g1t13.p1	3.97641	1.39363	0.00432722	0.0936538	evgtrinLocDN14675c1g1t13.p1	PREDICTED: uncharacterized protein LOC107339408 isoform X2 [Acropora digitifera]	2.38e-21	NA	NA	NA	NA	NA
GENE.evgHyS_ScswcV5_4196.g19055.t1~~evgHyS_ScswcV5_4196.g19055.t1.p1	3.04731	1.06831	0.00433826	0.0937757	evgHyS_ScswcV5_4196.g19055.t1.p1	U4/U6.U5 tri-snRNP-associated protein 2 [Stylophora pistillata]	0	Ubiquitin specific protease 39 and snrnp assembly factor	USP39	thiol-dependent ubiquitinyl hydrolase activity	spliceosomal complex assembly	precatalytic spliceosome
GENE.evgHyS_ScswcV5_3204.g12903.t1~~evgHyS_ScswcV5_3204.g12903.t1.p1	6.01007	2.10742	0.00434641	0.0938348	evgHyS_ScswcV5_3204.g12903.t1.p1	PREDICTED: uncharacterized protein LOC105317647 [Crassostrea gigas]	1.88e-11	NA	NA	NA	NA	NA
GENE.evgMSTRG.34886.1~~evgMSTRG.34886.1.p1	5.4019	1.89652	0.0043951	0.0947679	evgMSTRG.34886.1.p1	Retrovirus-related Pol polyprotein from transposon TNT 1-94 [Vitis vinifera]	0.12	NA	NA	NA	NA	NA
GENE.evgtrinLocDN2309c0g1t11~~evgtrinLocDN2309c0g1t11.p1	1.8011	0.63311	0.00444341	0.0955571	evgtrinLocDN2309c0g1t11.p1	PREDICTED: sacsin-like [Hydra vulgaris]	0	NA	NA	NA	NA	NA
GENE.evgHyS_ScswcV5_2512.g9789.t1~~evgHyS_ScswcV5_2512.g9789.t1.p1	2.35516	0.827972	0.00444823	0.0955571	evgHyS_ScswcV5_2512.g9789.t1.p1	PREDICTED: atlastin-2-like [Hydra vulgaris]	0	Atlastin GTPase 2	ATL2	GTPase activity	positive regulation of endoplasmic reticulum tubular network organization	endoplasmic reticulum tubular network membrane
GENE.evgtrinLocDN91554c0g1t21~~evgtrinLocDN91554c0g1t21.p1	5.68791	2.00185	0.00449272	0.0962144	evgtrinLocDN91554c0g1t21.p1	PREDICTED: peroxisomal membrane protein PMP34-like [Hydra vulgaris]	6.88e-153	LOW QUALITY PROTEIN: peroxisomal membrane protein PMP34	SLC25A17	FMN transmembrane transporter activity	AMP transport	integral component of peroxisomal membrane
GENE.evgtrinLocDN14622c0g1t6~~evgtrinLocDN14622c0g1t6.p1	4.66467	1.64239	0.00450908	0.0962144	evgtrinLocDN14622c0g1t6.p1	uncharacterized protein LOC110247327, partial [Exaiptasia pallida]	0.002	NA	NA	NA	NA	NA
GENE.evgHyS_ScswcV5_4509.g21527.t1~~evgHyS_ScswcV5_4509.g21527.t1.p1	3.06719	1.07999	0.00451129	0.0962144	evgHyS_ScswcV5_4509.g21527.t1.p1	PREDICTED: uncharacterized protein LOC100205133 [Hydra vulgaris]	5.24e-50	NA	NA	NA	NA	NA
GENE.evgtrinLocDN6881c2g1t7~~evgtrinLocDN6881c2g1t7.p1	6.00543	2.1209	0.00463228	0.0979039	NA	NA	NA	NA	NA	NA	NA	NA
GENE.evgHyS_ScswcV5_2750.g11297.t1~~evgHyS_ScswcV5_2750.g11297.t1.p1	5.6777	2.00681	0.00466614	0.0982895	evgHyS_ScswcV5_2750.g11297.t1.p1	PREDICTED: polyenoic fatty acid isomerase-like [Hydra vulgaris]	7.56e-51	Polyenoic fatty acid isomerase	NA	isomerase activity	oxidation-reduction process	NA
GENE.evgMSTRG.110529.1~~evgMSTRG.110529.1.p1	5.81938	2.05724	0.00467335	0.0983218	evgMSTRG.110529.1.p1	uncharacterized protein LOC110244635 isoform X2 [Exaiptasia pallida]	3.99e-60	Protein phosphatase 1 regulatory subunit 27	NA	NA	NA	NA
GENE.evgHyS_ScswcV5_2548.g10007.t1~~evgHyS_ScswcV5_2548.g10007.t1.p1	2.77878	0.982526	0.00468109	0.0983653	evgHyS_ScswcV5_2548.g10007.t1.p1	PREDICTED: protein pelota-like [Hydra vulgaris]	0	NA	NA	NA	NA	NA
GENE.evgHyS_ScswcV5_3204.g12815.t1~~evgHyS_ScswcV5_3204.g12815.t1.p1	2.5597	0.90522	0.00468823	0.098396	evgHyS_ScswcV5_3204.g12815.t1.p1	PREDICTED: hemicentin-1-like, partial [Sturnus vulgaris]	3.48e-101	NA	NA	NA	NA	NA
GENE.evgHyS_ScswcV5_3309.g13766.t1~~evgHyS_ScswcV5_3309.g13766.t1.p1	4.33982	1.53738	0.0047597	0.0989944	evgHyS_ScswcV5_3309.g13766.t1.p1	uridine 5'-monophosphate synthase-like [Orbicella faveolata]	0	Adenine phosphoribosyltransferase	UMPS	orotidine-5'-phosphate decarboxylase activity	'de novo' pyrimidine nucleobase biosynthetic process	nucleus
GENE.evgHyS_ScswcV5_66.g428.t1~~evgHyS_ScswcV5_66.g428.t1.p1	1.93129	0.684206	0.00476242	0.0989944	evgHyS_ScswcV5_66.g428.t1.p1	PREDICTED: uncharacterized protein LOC101236580 isoform X2 [Hydra vulgaris]	1.25e-26	NA	NA	NA	NA	NA
GENE.evgHyS_ScswcV5_2988.g11812.t1~~evgHyS_ScswcV5_2988.g11812.t1.p1	2.9952	1.06195	0.00479549	0.0992754	evgHyS_ScswcV5_2988.g11812.t1.p1	PREDICTED: uncharacterized protein LOC100375713 [Saccoglossus kowalevskii]	8.41e-28	NA	NA	NA	NA	NA
GENE.evgtrinLocDN42313c0g2t4~~evgtrinLocDN42313c0g2t4.p1	7.16122	2.54175	0.00484083	0.0997473	NA	NA	NA	NA	NA	NA	NA	NA
GENE.evgtrinLocDN6596c0g1t6~~evgtrinLocDN6596c0g1t6.p1	5.60547	1.99015	0.00485346	0.0997473	evgtrinLocDN6596c0g1t6.p1	PREDICTED: ER degradation-enhancing alpha-mannosidase-like protein 1 [Hydra vulgaris]	4.12e-62	alpha-1,2-Mannosidase	NA	mannosyl-oligosaccharide 1,2-alpha-mannosidase activity	positive regulation of retrograde protein transport, ER to cytosol	aggresome
GENE.evgMSTRG.20968.2~~evgMSTRG.20968.2.p1	2.06724	0.733997	0.00485618	0.0997473	evgMSTRG.20968.2.p1	FKBP-type peptidyl-prolyl cis-trans isomerase [Derxia lacustris]	1.67e-48	Peptidyl-prolyl cis-trans isomerase	NA	peptidyl-prolyl cis-trans isomerase activity	protein peptidyl-prolyl isomerization	integral component of membrane
GENE.evgMSTRG.81332.1~~evgMSTRG.81332.1.p1	6.17512	2.19411	0.00488674	0.0998604	evgMSTRG.81332.1.p1	hypothetical protein KP79_PYT25250 [Mizuhopecten yessoensis]	9.57e-26	NA	NA	NA	NA	NA
GENE.evgMSTRG.57683.1~~evgMSTRG.57683.1.p1	5.50313	1.95598	0.00490063	0.0998604	evgMSTRG.57683.1.p1	LOW QUALITY PROTEIN: uncharacterized protein LOC110242433 [Exaiptasia pallida]	7.17e-67	Gastrula zinc finger protein xlcgf46.1: PROVISIONAL	NA	DNA-directed DNA polymerase activity	DNA biosynthetic process	NA
GENE.evgtrinLocDN85731c0g1t5~~evgtrinLocDN85731c0g1t5.p1	4.41164	1.56808	0.00490201	0.0998604	evgtrinLocDN85731c0g1t5.p1	PREDICTED: LOW QUALITY PROTEIN: uncharacterized protein LOC107355241 [Acropora digitifera]	1.49e-68	Integrase core domain	NA	nucleic acid binding	DNA integration	integral component of membrane

## Sheet: RFamide-low vs control
gene_id	log2_fc	log2_FC_SE	pval	padj	transcript_id	best_BLAST_hit	eval	pannzer_description	pannzer_gene_name	molecular_function	biological_processes	cellular_component
GENE.evgtrinLocDN40098c0g1t2~~evgtrinLocDN40098c0g1t2.p1	7.19152	0.622292	6.84385e-31	6.51535e-27	evgtrinLocDN40098c0g1t2.p1	hypothetical protein XENTR_v900302321mg, partial [Xenopus tropicalis]	9.28e-32	NA	NA	NA	NA	NA
GENE.evgHyS_ScswcV5_2707.g11136.t1~~evgHyS_ScswcV5_2707.g11136.t1.p1	10.7878	0.991376	1.40956e-27	6.70952e-24	evgHyS_ScswcV5_2707.g11136.t1.p1	hypothetical protein IQ07DRAFT_585183 [Pyrenochaeta sp. DS3sAY3a]	1.02e-05	NA	NA	NA	NA	NA
GENE.evgtrinLocDN29857c0g1t4~~evgtrinLocDN29857c0g1t4.p1	8.45619	0.866128	1.61937e-22	3.42588e-19	evgtrinLocDN29857c0g1t4.p1	hypothetical protein AB205_0165870 [Rana catesbeiana]	4.87e-49	NA	NA	NA	NA	NA
GENE.evgtrinLocDN6229c1g1t5~~evgtrinLocDN6229c1g1t5.p1	9.79805	1.02846	1.62072e-21	2.80531e-18	evgtrinLocDN6229c1g1t5.p1	Alpha-tectorin, partial [Anabarilius grahami]	3.58e-70	NA	NA	NA	NA	NA
GENE.evgHyS_ScswcV5_17.g78.t1~~evgHyS_ScswcV5_17.g78.t1.p1	5.73547	0.603674	2.0802e-21	3.30058e-18	evgHyS_ScswcV5_17.g78.t1.p1	predicted protein [Nematostella vectensis]	3.84e-100	NA	NA	NA	NA	NA
GENE.evgtrinLocDN1009c0g1t11~~evgtrinLocDN1009c0g1t11.p1	13.255	1.42604	1.47229e-20	2.15634e-17	evgtrinLocDN1009c0g1t11.p1	Sushi, von Willebrand factor type A, EGF and pentraxin domain-containing protein 1 [Exaiptasia pallida]	2.26e-07	NA	NA	NA	NA	NA
GENE.evgMSTRG.14970.1~~evgMSTRG.14970.1.p1	6.73421	0.738162	7.31116e-20	9.94317e-17	evgMSTRG.14970.1.p1	MULTISPECIES: hypothetical protein [Marinobacter]	0.84	NA	NA	NA	NA	NA
GENE.evgHyS_ScswcV5_2444.g9339.t1~~evgHyS_ScswcV5_2444.g9339.t1.p1	8.06185	0.925258	2.95736e-18	2.96359e-15	evgHyS_ScswcV5_2444.g9339.t1.p1	PREDICTED: fibroblast growth factor receptor 2-like [Acropora digitifera]	1.82e-108	NA	NA	NA	NA	NA
GENE.evgHyS_ScswcV5_4367.g20353.t1~~evgHyS_ScswcV5_4367.g20353.t1.p1	6.19963	0.727182	1.52078e-17	1.31617e-14	evgHyS_ScswcV5_4367.g20353.t1.p1	PREDICTED: fibrinogen alpha-1 chain-like isoform X2 [Salmo salar]	2.34e-13	NA	NA	NA	NA	NA
GENE.evgtrinLocDN38197c0g1t6~~evgtrinLocDN38197c0g1t6.p1	7.67074	0.935076	2.33819e-16	1.64885e-13	evgtrinLocDN38197c0g1t6.p1	hypothetical protein [Flavobacterium sp. Root901]	0.036	NA	NA	NA	NA	NA
GENE.evgHyS_ScswcV5_3339.g14057.t1~~evgHyS_ScswcV5_3339.g14057.t1.p1	6.00893	0.737907	3.84928e-16	2.61751e-13	evgHyS_ScswcV5_3339.g14057.t1.p1	PREDICTED: tyrosyl-DNA phosphodiesterase 1-like [Hydra vulgaris]	1.25e-142	NA	NA	NA	NA	NA
GENE.evgHyS_ScswcV5_17.g40.t1~~evgHyS_ScswcV5_17.g40.t1.p1	8.25983	1.04474	2.65608e-15	1.40477e-12	evgHyS_ScswcV5_17.g40.t1.p1	predicted protein [Nematostella vectensis]	2.22e-91	NA	NA	NA	NA	NA
GENE.evgHyS_ScswcV5_2444.g9401.t1~~evgHyS_ScswcV5_2444.g9401.t1.p1	7.1659	0.907002	2.77474e-15	1.42787e-12	evgHyS_ScswcV5_2444.g9401.t1.p1	PREDICTED: fibroblast growth factor receptor 2-like, partial [Hydra vulgaris]	4.81e-101	NA	NA	NA	NA	NA
GENE.evgMSTRG.21810.1~~evgMSTRG.21810.1.p1	12.0994	1.53304	2.96401e-15	1.48512e-12	evgMSTRG.21810.1.p1	acetoacetyl-CoA synthetase-like [Exaiptasia pallida]	0	LOW QUALITY PROTEIN: acetoacetyl-CoA synthetase	AACS	acetoacetate-CoA ligase activity	lipid metabolic process	cytosol
GENE.evgMSTRG.16951.1~~evgMSTRG.16951.1.p1	6.78977	0.867147	4.87849e-15	2.26552e-12	evgMSTRG.16951.1.p1	PREDICTED: zinc finger protein 528-like [Hydra vulgaris]	2.62e-141	Zinc finger protein 226	NA	nucleic acid binding	negative regulation of transcription by RNA polymerase II	nucleus
GENE.evgHyS_ScswcV5_3964.g17630.t1~~evgHyS_ScswcV5_3964.g17630.t1.p1	10.6689	1.44472	1.52759e-13	5.81706e-11	evgHyS_ScswcV5_3964.g17630.t1.p1	potassium channel homolog [Polyorchis penicillatus]	4.69e-179	Potassium voltage gated channel protein Shaker	NA	voltage-gated potassium channel activity	regulation of ion transmembrane transport	voltage-gated potassium channel complex
GENE.evgHyS_ScswcV5_4075.g18720.t1~~evgHyS_ScswcV5_4075.g18720.t1.p1	5.95226	0.809621	1.95397e-13	7.01955e-11	evgHyS_ScswcV5_4075.g18720.t1.p1	PREDICTED: C-type lectin domain family 10 member A-like [Hydra vulgaris]	5.16e-14	NA	NA	NA	NA	NA
GENE.evgMSTRG.112819.2~~evgMSTRG.112819.2.p1	7.64303	1.05192	3.70777e-13	1.26064e-10	evgMSTRG.112819.2.p1	PREDICTED: probable glutamate receptor [Hydra vulgaris]	6.58e-44	NA	NA	NA	NA	NA
GENE.evgMSTRG.116101.3~~evgMSTRG.116101.3.p1	5.6484	0.779749	4.36083e-13	1.45667e-10	evgMSTRG.116101.3.p1	PREDICTED: neuronal acetylcholine receptor subunit alpha-3-like [Hydra vulgaris]	2.62e-149	Nicotinic acetylcholine receptor subunit type G	NA	acetylcholine-gated cation-selective channel activity	excitatory postsynaptic potential	postsynaptic membrane
GENE.evgtrinLocDN6210c0g1t3~~evgtrinLocDN6210c0g1t3.p1	4.71891	0.653184	5.03033e-13	1.60295e-10	evgtrinLocDN6210c0g1t3.p1	endothelin-converting enzyme 1-like [Hydra vulgaris]	0	Membrane metallo-endopeptidase	MME	metalloendopeptidase activity	proteolysis	brush border
GENE.evgMSTRG.20161.5~~evgMSTRG.20161.5.p1	6.9092	0.963818	7.57816e-13	2.18618e-10	evgMSTRG.20161.5.p1	PREDICTED: uncharacterized protein LOC105845533 [Hydra vulgaris]	3.62e-49	VIC family potassium channel protein	NA	voltage-gated potassium channel activity	potassium ion transmembrane transport	voltage-gated potassium channel complex
GENE.evgMSTRG.62340.1~~evgMSTRG.62340.1.p1	5.66061	0.792162	8.94897e-13	2.48347e-10	evgMSTRG.62340.1.p1	predicted protein [Nematostella vectensis]	4.23e-97	NA	NA	NA	NA	NA
GENE.evgtrinLocDN44103c0g1t2~~evgtrinLocDN44103c0g1t2.p2	7.31649	1.03021	1.22989e-12	3.34531e-10	evgtrinLocDN44103c0g1t2.p2	actin/green fluorescent protein fusion protein [Cloning vector pHyVec1]	0	Soluble-modified red-shifted green fluorescent protein	NA	cysteine-type endopeptidase activity	bioluminescence	virion
GENE.evgtrinLocDN10055c0g1t2~~evgtrinLocDN10055c0g1t2.p1	20.6314	2.92584	1.7707e-12	4.61838e-10	NA	NA	NA	NA	NA	NA	NA	NA
GENE.evgHyS_ScswcV5_3062.g12083.t1~~evgHyS_ScswcV5_3062.g12083.t1.p1	5.99063	0.85587	2.5694e-12	6.43702e-10	evgHyS_ScswcV5_3062.g12083.t1.p1	PREDICTED: uncharacterized protein LOC100209825 isoform X1 [Hydra vulgaris]	0	Potassium voltage-gated channel subfamily F member 1	NA	voltage-gated potassium channel activity	potassium ion transmembrane transport	voltage-gated potassium channel complex
GENE.evgtrinLocDN43662c0g1t8~~evgtrinLocDN43662c0g1t8.p1	4.5246	0.64908	3.1518e-12	7.79355e-10	evgtrinLocDN43662c0g1t8.p1	hypothetical protein CPAR2_107200 [Candida parapsilosis]	2	NA	NA	NA	NA	NA
GENE.evgtrinLocDN4684c1g4t1~~evgtrinLocDN4684c1g4t1.p1	5.31763	0.763144	3.21333e-12	7.84381e-10	evgtrinLocDN4684c1g4t1.p1	PREDICTED: plasma kallikrein-like [Hydra vulgaris]	4.08e-67	Similar to Plasma kallikrein precursor (Plasma prekallikrein) (Kininogenin) (Fletcher factor)	NA	serine-type endopeptidase activity	blood coagulation, intrinsic pathway	extracellular region
GENE.evgtrinLocDN706c1g2t3~~evgtrinLocDN706c1g2t3.p1	6.60218	0.952382	4.14092e-12	9.8554e-10	evgtrinLocDN706c1g2t3.p1	predicted protein [Nematostella vectensis]	4.72e-94	NA	NA	NA	NA	NA
GENE.evgtrinLocDN971c0g1t7~~evgtrinLocDN971c0g1t7.p1	6.17734	0.902447	7.64248e-12	1.68902e-09	evgtrinLocDN971c0g1t7.p1	neuronal acetylcholine receptor subunit alpha-2-like isoform X3 [Stylophora pistillata]	0	Nicotinic acetylcholine receptor subunit type G	NA	acetylcholine-gated cation-selective channel activity	excitatory postsynaptic potential	postsynaptic membrane
GENE.evgHyS_ScswcV5_4270.g19724.t1~~evgHyS_ScswcV5_4270.g19724.t1.p1	11.2234	1.64077	7.90313e-12	1.70995e-09	evgHyS_ScswcV5_4270.g19724.t1.p1	vesicular inhibitory amino acid transporter-like [Exaiptasia pallida]	2.32e-121	Vesicular inhibitory amino acid transporter	NA	amino acid transmembrane transporter activity	amino acid transmembrane transport	integral component of membrane
GENE.evgHyS_ScswcV5_4418.g21052.t1~~evgHyS_ScswcV5_4418.g21052.t1.p1	8.73213	1.28326	1.01306e-11	2.14318e-09	evgHyS_ScswcV5_4418.g21052.t1.p1	PREDICTED: probable glutamate receptor [Hydra vulgaris]	5.27e-51	NA	NA	NA	NA	NA
GENE.evgHyS_ScswcV5_644.g2352.t1~~evgHyS_ScswcV5_644.g2352.t1.p1	4.2016	0.618969	1.13652e-11	2.37795e-09	evgHyS_ScswcV5_644.g2352.t1.p1	PREDICTED: otoferlin-like [Hydra vulgaris]	0	Otoferlin a	NA	calcium ion binding	synaptic vesicle exocytosis	presynapse
GENE.evgHyS_ScswcV5_17.g77.t1~~evgHyS_ScswcV5_17.g77.t1.p1	4.87674	0.720999	1.3435e-11	2.7213e-09	evgHyS_ScswcV5_17.g77.t1.p1	PREDICTED: fibroblast growth factor receptor 2-like [Acropora digitifera]	4.85e-101	NA	NA	NA	NA	NA
GENE.evgHyS_ScswcV5_457.g1627.t1~~evgHyS_ScswcV5_457.g1627.t1.p1	7.90729	1.17129	1.46884e-11	2.91321e-09	evgHyS_ScswcV5_457.g1627.t1.p1	Protein IWS1, partial [Aptenodytes forsteri]	2.48e-59	NA	NA	NA	NA	NA
GENE.evgtrinLocDN61691c0g1t2~~evgtrinLocDN61691c0g1t2.p1	20.1158	3.00854	2.28964e-11	4.23251e-09	evgtrinLocDN61691c0g1t2.p1	zinc finger protein 883-like isoform X2 [Oreochromis niloticus]	7.32e-09	NA	NA	NA	NA	NA
GENE.evgHyS_ScswcV5_3298.g13607.t1~~evgHyS_ScswcV5_3298.g13607.t1.p1	7.11388	1.06495	2.38914e-11	4.37397e-09	evgHyS_ScswcV5_3298.g13607.t1.p1	PREDICTED: kelch-like protein 12 isoform X1 [Hydra vulgaris]	0	BTB (POZ) domain containing 5 (Predicted)	NA	transcription factor binding	germinal center formation	Cul3-RING ubiquitin ligase complex
GENE.evgtrinLocDN1755c1g1t3~~evgtrinLocDN1755c1g1t3.p2	9.60789	1.44806	3.24534e-11	5.60055e-09	evgtrinLocDN1755c1g1t3.p2	glucosamine-6-phosphate deaminase [Dethiobacter alkaliphilus]	6	NA	NA	NA	NA	NA
GENE.evgtrinLocDN17766c1g2t4~~evgtrinLocDN17766c1g2t4.p1	5.24224	0.790355	3.29444e-11	5.60055e-09	evgtrinLocDN17766c1g2t4.p1	degenerin mec-4-like isoform X1 [Orbicella faveolata]	1.55e-54	Amiloride-sensitive sodium channel subunit alpha	NA	sodium channel activity	sodium ion transmembrane transport	integral component of membrane
GENE.evgHyS_ScswcV5_1325.g4930.t1~~evgHyS_ScswcV5_1325.g4930.t1.p1	5.27782	0.800841	4.38799e-11	7.20235e-09	evgHyS_ScswcV5_1325.g4930.t1.p1	uncharacterized protein LOC110244097 isoform X2 [Exaiptasia pallida]	0	Potassium voltage-gated channel protein eag	NA	voltage-gated potassium channel activity	regulation of ion transmembrane transport	integral component of plasma membrane
GENE.evgHyS_ScswcV5_4509.g21416.t1~~evgHyS_ScswcV5_4509.g21416.t1.p1	5.36416	0.818432	5.59436e-11	8.86177e-09	evgHyS_ScswcV5_4509.g21416.t1.p1	venom toxin [Hemiscorpius lepturus]	1.58e-13	Cysteine-rich motor neuron 1 protein (Fragment)	CRIM1	insulin-like growth factor binding	negative regulation of endopeptidase activity	extracellular region
GENE.evgHyS_ScswcV5_66.g615.t1~~evgHyS_ScswcV5_66.g615.t1.p1	5.80446	0.9058	1.47336e-10	2.14144e-08	evgHyS_ScswcV5_66.g615.t1.p1	cadherin-23-like [Exaiptasia pallida]	1.1e-137	FAT atypical cadherin 4	FAT4	calcium ion binding	homophilic cell adhesion via plasma membrane adhesion molecules	plasma membrane
GENE.evgMSTRG.140531.1~~evgMSTRG.140531.1.p1	5.15592	0.804975	1.50306e-10	2.15175e-08	evgMSTRG.140531.1.p1	PREDICTED: BTB/POZ domain-containing protein 6-like [Hydra vulgaris]	1.9e-174	BTB/POZ domain-containing protein 6	NA	NA	neurogenesis	cytosol
GENE.evgHyS_ScswcV5_457.g1680.t1~~evgHyS_ScswcV5_457.g1680.t1.p1	10.0196	1.59596	3.42676e-10	4.46887e-08	evgHyS_ScswcV5_457.g1680.t1.p1	acid-sensing ion channel 4-like [Stylophora pistillata]	1.39e-22	NA	NA	NA	NA	NA
GENE.evgHyS_ScswcV5_4378.g20502.t1~~evgHyS_ScswcV5_4378.g20502.t1.p1	4.4478	0.71161	4.0959e-10	5.08635e-08	evgHyS_ScswcV5_4378.g20502.t1.p1	glutamate receptor ionotropic, NMDA 1-like [Exaiptasia pallida]	0	Glutamate ionotropic receptor NMDA type subunit 1	GRIN1	ionotropic glutamate receptor activity	ionotropic glutamate receptor signaling pathway	postsynaptic membrane
GENE.evgMSTRG.101771.1~~evgMSTRG.101771.1.p1	7.60716	1.21722	4.11396e-10	5.08635e-08	evgMSTRG.101771.1.p1	PREDICTED: neuronal acetylcholine receptor subunit alpha-10-like [Hydra vulgaris]	7.13e-137	Cholinergic receptor nicotinic epsilon subunit	NA	acetylcholine-gated cation-selective channel activity	excitatory postsynaptic potential	postsynaptic membrane
GENE.evgHyS_ScswcV5_4051.g18245.t1~~evgHyS_ScswcV5_4051.g18245.t1.p1	5.78689	0.928486	4.58724e-10	5.5823e-08	evgHyS_ScswcV5_4051.g18245.t1.p1	PREDICTED: transcriptional activator Myb-like [Hydra vulgaris]	3.1e-153	Transcriptional activator Myb (Fragment)	NA	DNA binding	regulation of transcription, DNA-templated	nucleus
GENE.evgtrinLocDN16247c0g1t23~~evgtrinLocDN16247c0g1t23.p1	6.33011	1.02803	7.38972e-10	8.77791e-08	evgtrinLocDN16247c0g1t23.p1	PREDICTED: caltractin-like [Daucus carota subsp. sativus]	3.7e-23	Calcium-binding EF-hand	NA	calcium ion binding	spindle pole body duplication	half bridge of spindle pole body
GENE.evgHyS_ScswcV5_1733.g5638.t1~~evgHyS_ScswcV5_1733.g5638.t1.p1	4.06613	0.661775	8.03257e-10	9.44075e-08	evgHyS_ScswcV5_1733.g5638.t1.p1	PREDICTED: metabotropic glutamate receptor 3-like isoform X1 [Hydra vulgaris]	0	Extracellular calcium-sensing receptor	NA	G protein-coupled receptor activity	G protein-coupled receptor signaling pathway	plasma membrane
GENE.evgMSTRG.47738.1~~evgMSTRG.47738.1.p1	10.0459	1.63866	8.75751e-10	1.01673e-07	evgMSTRG.47738.1.p1	PREDICTED: uncharacterized protein LOC105846238 [Hydra vulgaris]	0.051	NA	NA	NA	NA	NA
GENE.evgtrinLocDN64182c0g1t4~~evgtrinLocDN64182c0g1t4.p2	7.06214	1.16051	1.16221e-09	1.32506e-07	evgtrinLocDN64182c0g1t4.p2	hypothetical protein [Papillibacter cinnamivorans]	2.3	NA	NA	NA	NA	NA
GENE.evgtrinLocDN1210c0g1t9~~evgtrinLocDN1210c0g1t9.p1	4.99377	0.821612	1.21679e-09	1.37087e-07	evgtrinLocDN1210c0g1t9.p1	PREDICTED: fibroblast growth factor receptor 2-like [Acropora digitifera]	1.29e-97	NA	NA	NA	NA	NA
GENE.evgMSTRG.43193.1~~evgMSTRG.43193.1.p1	5.12022	0.84282	1.23909e-09	1.37966e-07	evgMSTRG.43193.1.p1	C-X-C chemokine receptor type 2-like [Rhincodon typus]	0.44	NA	NA	NA	NA	NA
GENE.evgtrinLocDN100125c0g1t7~~evgtrinLocDN100125c0g1t7.p1	9.32868	1.54329	1.49728e-09	1.61979e-07	evgtrinLocDN100125c0g1t7.p1	PREDICTED: tyramine receptor Ser-2-like [Acropora digitifera]	1.95e-08	octopamine receptor beta-1R-like	NA	G protein-coupled serotonin receptor activity	regulation of appetite	integral component of plasma membrane
GENE.evgHyS_ScswcV5_2457.g9530.t1~~evgHyS_ScswcV5_2457.g9530.t1.p1	5.09459	0.849033	1.9675e-09	2.08117e-07	evgHyS_ScswcV5_2457.g9530.t1.p1	calcium/calmodulin-dependent protein kinase type 1-like isoform X2 [Stylophora pistillata]	4.37e-157	Pregnancy up-regulated nonubiquitous CaM kinase	NA	protein kinase activity	protein phosphorylation	calcium- and calmodulin-dependent protein kinase complex
GENE.evgMSTRG.119948.1~~evgMSTRG.119948.1.p1	7.3859	1.23363	2.13584e-09	2.24676e-07	evgMSTRG.119948.1.p1	PREDICTED: cysteine-rich motor neuron 1 protein-like [Branchiostoma belcheri]	7.64e-07	NA	NA	NA	NA	NA
GENE.evgMSTRG.19125.1~~evgMSTRG.19125.1.p1	8.6711	1.49041	5.95751e-09	5.78729e-07	evgMSTRG.19125.1.p1	PREDICTED: uncharacterized protein LOC101238602 [Hydra vulgaris]	6.81e-28	NA	NA	NA	NA	NA
GENE.evgMSTRG.73609.2~~evgMSTRG.73609.2.p1	4.65815	0.807651	8.04433e-09	7.62011e-07	evgMSTRG.73609.2.p1	PREDICTED: sodium/calcium exchanger 1-like [Hydra vulgaris]	0	NA	NA	NA	NA	NA
GENE.evgMSTRG.117483.14~~evgMSTRG.117483.14.p1	8.17719	1.41923	8.32658e-09	7.81162e-07	evgMSTRG.117483.14.p1	PREDICTED: uncharacterized protein LOC100205133 [Hydra vulgaris]	1.36e-49	NA	NA	NA	NA	NA
GENE.evgHyS_ScswcV5_3062.g12011.t1~~evgHyS_ScswcV5_3062.g12011.t1.p1	4.38366	0.76321	9.26219e-09	8.51943e-07	evgHyS_ScswcV5_3062.g12011.t1.p1	PREDICTED: uncharacterized protein LOC100198750 [Hydra vulgaris]	2.42e-130	NA	NA	NA	NA	NA
GENE.evgtrinLocDN4660c0g1t1~~evgtrinLocDN4660c0g1t1.p1	7.11827	1.24164	9.86811e-09	8.94709e-07	evgtrinLocDN4660c0g1t1.p1	PREDICTED: uncharacterized protein LOC105843510 [Hydra vulgaris]	1.15e-05	NA	NA	NA	NA	NA
GENE.evgtrinLocDN29333c0g1t11~~evgtrinLocDN29333c0g1t11.p2	8.62848	1.51382	1.19944e-08	1.04981e-06	evgtrinLocDN29333c0g1t11.p2	acid-sensing ion channel 4-like [Stylophora pistillata]	6.84e-30	NA	NA	NA	NA	NA
GENE.evgHyS_ScswcV5_457.g1621.t1~~evgHyS_ScswcV5_457.g1621.t1.p1	7.14956	1.25863	1.34349e-08	1.15225e-06	evgHyS_ScswcV5_457.g1621.t1.p1	adhesion G protein-coupled receptor L3-like [Ciona intestinalis]	5.14e-51	Adhesion G protein-coupled receptor E3	NA	G protein-coupled receptor activity	cell surface receptor signaling pathway	integral component of membrane
GENE.evgHyS_ScswcV5_4261.g19280.t1~~evgHyS_ScswcV5_4261.g19280.t1.p1	10.0195	1.76915	1.48345e-08	1.26093e-06	evgHyS_ScswcV5_4261.g19280.t1.p1	uncharacterized protein LOC111323405 isoform X2 [Stylophora pistillata]	5.76e-60	Rho guanine nucleotide exchange factor 25	ARHGEF25	Rho guanyl-nucleotide exchange factor activity	regulation of Rho protein signal transduction	cytoskeleton
GENE.evgMSTRG.49966.1~~evgMSTRG.49966.1.p1	3.94259	0.697873	1.60968e-08	1.35555e-06	evgMSTRG.49966.1.p1	PREDICTED: DDB1- and CUL4-associated factor 11-like [Hydra vulgaris]	0	LOW QUALITY PROTEIN: DDB1- and CUL4-associated factor 11	DCAF11	phosphoenolpyruvate carboxykinase (GTP) activity	proteasome-mediated ubiquitin-dependent protein catabolic process	Cul4-RING E3 ubiquitin ligase complex
GENE.evgHyS_ScswcV5_1325.g4743.t1~~evgHyS_ScswcV5_1325.g4743.t1.p1	4.45037	0.798747	2.52291e-08	2.00151e-06	evgHyS_ScswcV5_1325.g4743.t1.p1	alpha-1,6-mannosylglycoprotein 6-beta-N-acetylglucosaminyltransferase A-like [Pocillopora damicornis]	0	Alpha-1,6-mannosylglycoprotein 6-beta-N-acetylglucosaminyltransferase A	MGAT5	alpha-1,6-mannosylglycoprotein 6-beta-N-acetylglucosaminyltransferase activity	protein N-linked glycosylation	Golgi apparatus
GENE.evgMSTRG.12182.2~~evgMSTRG.12182.2.p1	10.3054	1.86644	3.36233e-08	2.61301e-06	NA	NA	NA	NA	NA	NA	NA	NA
GENE.evgHyS_ScswcV5_2556.g10245.t1~~evgHyS_ScswcV5_2556.g10245.t1.p1	4.50057	0.816656	3.56855e-08	2.75082e-06	evgHyS_ScswcV5_2556.g10245.t1.p1	PREDICTED: uncharacterized protein LOC101238206 [Hydra vulgaris]	0	NA	NA	NA	NA	NA
GENE.evgMSTRG.20928.1~~evgMSTRG.20928.1.p1	4.74783	0.87336	5.44049e-08	4.07822e-06	evgMSTRG.20928.1.p1	PREDICTED: EGF-like module-containing mucin-like hormone receptor-like 3 [Hydra vulgaris]	2.76e-51	NA	NA	NA	NA	NA
GENE.evgHyS_ScswcV5_4509.g21491.t1~~evgHyS_ScswcV5_4509.g21491.t1.p1	9.49082	1.75017	5.86732e-08	4.36382e-06	evgHyS_ScswcV5_4509.g21491.t1.p1	FAD-dependent oxidoreductase domain-containing protein 1-like [Orbicella faveolata]	9.56e-127	Hydrogen cyanide synthase subunit HcnC	NA	oxidoreductase activity	oxidation-reduction process	mitochondrial respiratory chain complex I
GENE.evgHyS_ScswcV5_2556.g10593.t1~~evgHyS_ScswcV5_2556.g10593.t1.p1	7.07962	1.30977	6.47193e-08	4.72128e-06	evgHyS_ScswcV5_2556.g10593.t1.p1	PREDICTED: neuronal acetylcholine receptor subunit alpha-6-like [Hydra vulgaris]	4.81e-150	acetylcholine receptor subunit alpha	NA	acetylcholine-gated cation-selective channel activity	excitatory postsynaptic potential	postsynaptic membrane
GENE.evgHyS_ScswcV5_2556.g10188.t1~~evgHyS_ScswcV5_2556.g10188.t1.p1	4.27454	0.794259	7.3746e-08	5.31865e-06	evgHyS_ScswcV5_2556.g10188.t1.p1	PREDICTED: exocyst complex component 1-like isoform X3 [Hydra vulgaris]	0	exocyst complex component 1	NA	G protein-coupled receptor activity	G protein-coupled receptor signaling pathway	exocyst
GENE.evgHyS_ScswcV5_4270.g19793.t1~~evgHyS_ScswcV5_4270.g19793.t1.p1	9.50606	1.7715	8.04517e-08	5.78038e-06	evgHyS_ScswcV5_4270.g19793.t1.p1	putative allatostatin B receptor [Daphnia pulex]	0.028	NA	NA	NA	NA	NA
GENE.evgtrinLocDN10996c0g1t11~~evgtrinLocDN10996c0g1t11.p1	4.84831	0.905008	8.45211e-08	6.00478e-06	evgtrinLocDN10996c0g1t11.p1	PREDICTED: uncharacterized protein LOC100368426 [Saccoglossus kowalevskii]	8.55e-86	NA	NA	NA	NA	NA
GENE.evgMSTRG.108646.1~~evgMSTRG.108646.1.p1	8.13827	1.53156	1.07421e-07	7.49193e-06	evgMSTRG.108646.1.p1	adenosine receptor A2b-like [Orbicella faveolata]	1.13e-08	NA	NA	NA	NA	NA
GENE.evgHyS_ScswcV5_4378.g20826.t1~~evgHyS_ScswcV5_4378.g20826.t1.p1	3.33349	0.631074	1.27608e-07	8.70844e-06	evgHyS_ScswcV5_4378.g20826.t1.p1	PREDICTED: PC3-like endoprotease variant B [Hydra vulgaris]	0	Pheromone processing endoprotease	NA	serine-type endopeptidase activity	proteolysis	trans-Golgi network
GENE.evgHyS_ScswcV5_3964.g17774.t1~~evgHyS_ScswcV5_3964.g17774.t1.p1	8.61487	1.63165	1.29285e-07	8.76009e-06	evgHyS_ScswcV5_3964.g17774.t1.p1	PREDICTED: uncharacterized protein LOC105849937 [Hydra vulgaris]	2.64e-15	NA	NA	NA	NA	NA
GENE.evgHyS_ScswcV5_3415.g14289.t1~~evgHyS_ScswcV5_3415.g14289.t1.p1	5.54545	1.0545	1.44962e-07	9.6845e-06	evgHyS_ScswcV5_3415.g14289.t1.p1	PREDICTED: DNA repair and recombination protein RAD54B-like [Hydra vulgaris]	0	DNA repair and recombination protein RAD54B	RAD54B	ATP binding	determination of adult lifespan	nucleus
GENE.evgMSTRG.125391.6~~evgMSTRG.125391.6.p1	5.78957	1.11103	1.87843e-07	1.20018e-05	evgMSTRG.125391.6.p1	PREDICTED: uncharacterized protein LOC105845103 [Hydra vulgaris]	3.2e-21	Bacterial extracellular solute-binding protein, family 3	NA	voltage-gated potassium channel activity	ionotropic glutamate receptor signaling pathway	voltage-gated potassium channel complex
GENE.evgHyS_ScswcV5_2427.g9210.t1~~evgHyS_ScswcV5_2427.g9210.t1.p1	3.82116	0.73418	1.94345e-07	1.23732e-05	evgHyS_ScswcV5_2427.g9210.t1.p1	PREDICTED: unconventional myosin-VI-like [Hydra vulgaris]	0	Unconventional myosin-VI	MYO6	motor activity	DNA damage response, signal transduction by p53 class mediator	myosin complex
GENE.evgHyS_ScswcV5_3298.g13357.t1~~evgHyS_ScswcV5_3298.g13357.t1.p1	4.08913	0.78664	2.01204e-07	1.27273e-05	evgHyS_ScswcV5_3298.g13357.t1.p1	Contactin-associated protein 4-like [Hydra vulgaris]	0	Contactin-associated protein 1	NA	signaling receptor binding	regulation of embryonic development	basement membrane
GENE.evgMSTRG.25563.4~~evgMSTRG.25563.4.p1	6.73083	1.29767	2.1389e-07	1.33321e-05	evgMSTRG.25563.4.p1	Extracellular calcium-sensing receptor [Stylophora pistillata]	1.72e-25	NA	NA	NA	NA	NA
GENE.evgHyS_ScswcV5_3094.g12216.t1~~evgHyS_ScswcV5_3094.g12216.t1.p1	7.31137	1.40969	2.14266e-07	1.33321e-05	evgHyS_ScswcV5_3094.g12216.t1.p1	PREDICTED: arachidonate 5-lipoxygenase-like [Hydra vulgaris]	7.19e-148	NA	NA	NA	NA	NA
GENE.evgHyS_ScswcV5_2750.g11300.t1~~evgHyS_ScswcV5_2750.g11300.t1.p1	3.09896	0.600943	2.51161e-07	1.5476e-05	evgHyS_ScswcV5_2750.g11300.t1.p1	PREDICTED: ankycorbin-like [Hydra vulgaris]	1.19e-137	NA	NA	NA	NA	NA
GENE.evgHyS_ScswcV5_3978.g17888.t1~~evgHyS_ScswcV5_3978.g17888.t1.p1	4.6315	0.900583	2.70707e-07	1.65732e-05	evgHyS_ScswcV5_3978.g17888.t1.p1	Fibroblast growth factor receptor 1 [Exaiptasia pallida]	1.66e-23	NA	NA	NA	NA	NA
GENE.evgtrinLocDN125265c0g1t4~~evgtrinLocDN125265c0g1t4.p1	8.5095	1.6552	2.73184e-07	1.66712e-05	evgtrinLocDN125265c0g1t4.p1	beta-4C adrenergic receptor-like [Pocillopora damicornis]	1.15e-08	NA	NA	NA	NA	NA
GENE.evgtrinLocDN26740c0g1t1~~evgtrinLocDN26740c0g1t1.p1	7.16061	1.39603	2.90851e-07	1.74742e-05	evgtrinLocDN26740c0g1t1.p1	PREDICTED: pleckstrin homology domain-containing family G member 5-like [Hydra vulgaris]	4.01e-140	NA	NA	NA	NA	NA
GENE.evgtrinLocDN6210c0g1t1~~evgtrinLocDN6210c0g1t1.p1	9.27929	1.81074	2.98178e-07	1.77416e-05	evgtrinLocDN6210c0g1t1.p1	endothelin-converting enzyme 1-like [Hydra vulgaris]	5.33e-128	neprilysin	NA	metalloendopeptidase activity	proteolysis	brush border
GENE.evgMSTRG.41749.1~~evgMSTRG.41749.1.p1	5.46669	1.07022	3.25569e-07	1.90733e-05	evgMSTRG.41749.1.p1	PREDICTED: mechanosensory protein 2-like [Hydra vulgaris]	1e-135	Prohibitins and stomatins of the pid superfamily	MEC-2	cholesterol binding	mechanosensory behavior	membrane
GENE.evgHyS_ScswcV5_3781.g16095.t1~~evgHyS_ScswcV5_3781.g16095.t1.p1	3.71019	0.731516	3.93811e-07	2.27908e-05	evgHyS_ScswcV5_3781.g16095.t1.p1	neurofilament medium polypeptide-like [Orbicella faveolata]	4.93e-32	NA	NA	NA	NA	NA
GENE.evgtrinLocDN8991c0g1t15~~evgtrinLocDN8991c0g1t15.p1	7.71222	1.52862	4.53025e-07	2.59034e-05	evgtrinLocDN8991c0g1t15.p1	sodium-dependent multivitamin transporter-like isoform X2 [Mizuhopecten yessoensis]	2.1	NA	NA	NA	NA	NA
GENE.evgtrinLocDN9744c0g1t8~~evgtrinLocDN9744c0g1t8.p1	3.68244	0.730061	4.55864e-07	2.5987e-05	evgtrinLocDN9744c0g1t8.p1	LOW QUALITY PROTEIN: adenylate cyclase type 3-like [Stylophora pistillata]	0	Adenylate cyclase type	NA	phosphorus-oxygen lyase activity	cyclic nucleotide biosynthetic process	plasma membrane
GENE.evgMSTRG.135691.1~~evgMSTRG.135691.1.p1	8.86949	1.76011	4.67549e-07	2.63377e-05	evgMSTRG.135691.1.p1	cnidarian egg lectin isoform a [Hydractinia echinata]	0	NA	NA	NA	NA	NA
GENE.evgtrinLocDN42118c0g1t2~~evgtrinLocDN42118c0g1t2.p1	3.94652	0.784793	4.93718e-07	2.74064e-05	evgtrinLocDN42118c0g1t2.p1	PREDICTED: DNA damage-regulated autophagy modulator protein 1-like [Hydra vulgaris]	2.22e-98	DNA damage-regulated autophagy modulator protein 1	NA	NA	regulation of autophagy	integral component of membrane
GENE.evgHyS_ScswcV5_2988.g11739.t1~~evgHyS_ScswcV5_2988.g11739.t1.p1	5.01378	0.999283	5.23812e-07	2.89084e-05	evgHyS_ScswcV5_2988.g11739.t1.p1	PREDICTED: uncharacterized protein LOC100197998 [Hydra vulgaris]	1.94e-07	NA	NA	NA	NA	NA
GENE.evgHyS_ScswcV5_664.g2805.t1~~evgHyS_ScswcV5_664.g2805.t1.p1	4.05583	0.810143	5.54832e-07	3.03563e-05	evgHyS_ScswcV5_664.g2805.t1.p1	coiled-coil domain-containing protein 33-like [Stylophora pistillata]	9.69e-33	NA	NA	NA	NA	NA
GENE.evgtrinLocDN35073c0g1t3~~evgtrinLocDN35073c0g1t3.p1	5.97512	1.19815	6.13432e-07	3.27164e-05	evgtrinLocDN35073c0g1t3.p1	PREDICTED: olfactory receptor 5D18-like [Hydra vulgaris]	0.028	NA	NA	NA	NA	NA
GENE.evgHyS_ScswcV5_3094.g12176.t1~~evgHyS_ScswcV5_3094.g12176.t1.p1	7.34642	1.47399	6.22692e-07	3.30291e-05	evgHyS_ScswcV5_3094.g12176.t1.p1	allorecognition 1 [Hydractinia symbiolongicarpus]	2.35e-11	NA	NA	NA	NA	NA
GENE.evgHyS_ScswcV5_3882.g16789.t1~~evgHyS_ScswcV5_3882.g16789.t1.p1	3.04034	0.610771	6.42875e-07	3.38131e-05	evgHyS_ScswcV5_3882.g16789.t1.p1	ELAV [Hydractinia echinata]	0	RNA-binding protein 9, isoform J	NA	RNA binding	germ cell proliferation	nucleus
GENE.evgtrinLocDN36132c0g1t10~~evgtrinLocDN36132c0g1t10.p2	6.05113	1.21873	6.86606e-07	3.59148e-05	evgtrinLocDN36132c0g1t10.p2	PREDICTED: submaxillary mucin-like protein [Hydra vulgaris]	2e-31	NA	NA	NA	NA	NA
GENE.evgMSTRG.132526.5~~evgMSTRG.132526.5.p1	6.78232	1.3719	7.66386e-07	3.93963e-05	evgMSTRG.132526.5.p1	hypothetical protein [Marinobacter sp. PWS21]	9.8	NA	NA	NA	NA	NA
GENE.evgtrinLocDN1135c0g1t5~~evgtrinLocDN1135c0g1t5.p1	8.38212	1.69707	7.84494e-07	4.00449e-05	evgtrinLocDN1135c0g1t5.p1	alpha-2 adrenergic receptor-like [Centruroides sculpturatus]	4e-08	NA	NA	NA	NA	NA
GENE.evgtrinLocDN9773c0g2t3~~evgtrinLocDN9773c0g2t3.p1	9.85817	1.99796	8.05166e-07	4.09903e-05	evgtrinLocDN9773c0g2t3.p1	pyruvate carboxylase subunit B [Clostridiales bacterium NK3B98]	8.7	NA	NA	NA	NA	NA
GENE.evgHyS_ScswcV5_4270.g19873.t1~~evgHyS_ScswcV5_4270.g19873.t1.p1	4.5835	0.929207	8.1099e-07	4.11767e-05	evgHyS_ScswcV5_4270.g19873.t1.p1	MULTISPECIES: FAD-binding oxidoreductase [Burkholderiaceae]	2	NA	NA	NA	NA	NA
GENE.evgHyS_ScswcV5_2427.g9117.t1~~evgHyS_ScswcV5_2427.g9117.t1.p1	4.04135	0.819428	8.14282e-07	4.12338e-05	evgHyS_ScswcV5_2427.g9117.t1.p1	uncharacterized protein C6orf118-like [Stylophora pistillata]	7.08e-45	NA	NA	NA	NA	NA
GENE.evgtrinLocDN42782c0g1t9~~evgtrinLocDN42782c0g1t9.p1	10.5334	2.13937	8.49727e-07	4.26881e-05	NA	NA	NA	NA	NA	NA	NA	NA
GENE.evgMSTRG.131677.1~~evgMSTRG.131677.1.p1	5.2382	1.06881	9.53607e-07	4.75306e-05	evgMSTRG.131677.1.p1	PREDICTED: extracellular calcium-sensing receptor-like [Hydra vulgaris]	6.13e-163	NA	NA	NA	NA	NA
GENE.evgtrinLocDN33938c2g1t1~~evgtrinLocDN33938c2g1t1.p1	5.0226	1.02594	9.80108e-07	4.83452e-05	evgtrinLocDN33938c2g1t1.p1	PREDICTED: dopamine receptor 2-like [Acropora digitifera]	1.89e-25	NA	NA	NA	NA	NA
GENE.evgMSTRG.106786.1~~evgMSTRG.106786.1.p1	5.13315	1.04975	1.00893e-06	4.95102e-05	evgMSTRG.106786.1.p1	PREDICTED: D(1A) dopamine receptor-like [Hydra vulgaris]	1.65e-43	Beta-2 adrenergic receptor	NA	G protein-coupled receptor activity	G protein-coupled receptor signaling pathway	integral component of membrane
GENE.evgMSTRG.66903.1~~evgMSTRG.66903.1.p1	6.59444	1.35158	1.06596e-06	5.13819e-05	NA	NA	NA	NA	NA	NA	NA	NA
GENE.evgHyS_ScswcV5_3209.g12969.t1~~evgHyS_ScswcV5_3209.g12969.t1.p1	4.34495	0.891055	1.08156e-06	5.20022e-05	evgHyS_ScswcV5_3209.g12969.t1.p1	PREDICTED: NADP-dependent malic enzyme-like [Hydra vulgaris]	0	NADP-dependent malic enzyme	ME1	malate dehydrogenase (decarboxylating) (NAD+) activity	regulation of NADP metabolic process	mitochondrion
GENE.evgtrinLocDN113187c0g1t18~~evgtrinLocDN113187c0g1t18.p1	9.4116	1.94307	1.27462e-06	6.00713e-05	evgtrinLocDN113187c0g1t18.p1	hypothetical protein OESDEN_03796 [Oesophagostomum dentatum]	1.1	NA	NA	NA	NA	NA
GENE.evgHyS_ScswcV5_1953.g8035.t1~~evgHyS_ScswcV5_1953.g8035.t1.p1	4.77914	0.986959	1.28353e-06	6.03418e-05	evgHyS_ScswcV5_1953.g8035.t1.p1	Sox24 [Hydractinia echinata]	0	Transcription factor HoSoxJ2	NA	DNA binding	developmental process	nucleus
GENE.evgtrinLocDN1946c1g1t3~~evgtrinLocDN1946c1g1t3.p1	8.10944	1.67675	1.32217e-06	6.18531e-05	evgtrinLocDN1946c1g1t3.p1	hypothetical protein AC249_AIPGENE26930 [Exaiptasia pallida]	2.49e-09	NA	NA	NA	NA	NA
GENE.evgtrinLocDN31111c0g1t9~~evgtrinLocDN31111c0g1t9.p1	7.59352	1.58195	1.58577e-06	7.27542e-05	evgtrinLocDN31111c0g1t9.p1	predicted protein [Nematostella vectensis]	1.82e-24	NA	NA	NA	NA	NA
GENE.evgHyS_ScswcV5_4475.g21251.t1~~evgHyS_ScswcV5_4475.g21251.t1.p1	6.10309	1.27214	1.60646e-06	7.335e-05	evgHyS_ScswcV5_4475.g21251.t1.p1	predicted protein [Nematostella vectensis]	3.38e-99	NA	NA	NA	NA	NA
GENE.evgMSTRG.61468.2~~evgMSTRG.61468.2.p1	3.46984	0.723631	1.62645e-06	7.40853e-05	evgMSTRG.61468.2.p1	diacylglycerol kinase delta-like [Exaiptasia pallida]	0	Diacylglycerol kinase	NA	diacylglycerol kinase activity	protein kinase C-activating G protein-coupled receptor signaling pathway	NA
GENE.evgtrinLocDN53201c0g1t2~~evgtrinLocDN53201c0g1t2.p1	8.10471	1.69204	1.66848e-06	7.56422e-05	evgtrinLocDN53201c0g1t2.p1	PREDICTED: uncharacterized protein LOC105843510 [Hydra vulgaris]	5	NA	NA	NA	NA	NA
GENE.evgMSTRG.99004.1~~evgMSTRG.99004.1.p1	3.01573	0.632262	1.84456e-06	8.30269e-05	evgMSTRG.99004.1.p1	PREDICTED: potassium voltage-gated channel subfamily C member 1-like, partial [Hydra vulgaris]	0	Potassium voltage-gated channel protein Shaw	NA	voltage-gated potassium channel activity	potassium ion transmembrane transport	voltage-gated potassium channel complex
GENE.evgtrinLocDN8143c0g2t27~~evgtrinLocDN8143c0g2t27.p1	3.81958	0.803378	1.99039e-06	8.91693e-05	evgtrinLocDN8143c0g2t27.p1	PREDICTED: 5-hydroxytryptamine receptor 1E-like [Hydra vulgaris]	1.27e-32	NA	NA	NA	NA	NA
GENE.evgtrinLocDN44937c0g1t17~~evgtrinLocDN44937c0g1t17.p1	5.68491	1.20167	2.23609e-06	9.85535e-05	evgtrinLocDN44937c0g1t17.p1	uncharacterized protein LOC110046768 isoform X2 [Orbicella faveolata]	2.05e-54	NA	NA	NA	NA	NA
GENE.evgHyS_ScswcV5_1783.g7251.t1~~evgHyS_ScswcV5_1783.g7251.t1.p1	6.84759	1.44767	2.24432e-06	9.8688e-05	evgHyS_ScswcV5_1783.g7251.t1.p1	potassium voltage-gated channel subfamily A member 2-like [Exaiptasia pallida]	2.18e-18	NA	NA	NA	NA	NA
GENE.evgHyS_ScswcV5_3094.g12284.t1~~evgHyS_ScswcV5_3094.g12284.t1.p1	6.58959	1.39657	2.3769e-06	0.000104037	evgHyS_ScswcV5_3094.g12284.t1.p1	Contactin-associated protein 4 [Hydra vulgaris]	5.91e-150	NA	NA	NA	NA	NA
GENE.evgMSTRG.59768.1~~evgMSTRG.59768.1.p1	8.94433	1.89761	2.43522e-06	0.00010586	evgMSTRG.59768.1.p1	2,4-dihydroxyhept-2-ene-1,7-dioic acid aldolase [Desulfobacteraceae bacterium]	0.16	NA	NA	NA	NA	NA
GENE.evgtrinLocDN20010c0g1t13~~evgtrinLocDN20010c0g1t13.p1	6.96606	1.47856	2.46024e-06	0.00010622	evgtrinLocDN20010c0g1t13.p1	Extracellular calcium-sensing receptor [Stylophora pistillata]	6.05e-31	NA	NA	NA	NA	NA
GENE.evgtrinLocDN58713c0g1t10~~evgtrinLocDN58713c0g1t10.p1	8.50878	1.80985	2.5841e-06	0.000110814	evgtrinLocDN58713c0g1t10.p1	PREDICTED: uncharacterized protein LOC105846238 [Hydra vulgaris]	0.007	NA	NA	NA	NA	NA
GENE.evgHyS_ScswcV5_1783.g7120.t1~~evgHyS_ScswcV5_1783.g7120.t1.p1	3.3229	0.709904	2.85792e-06	0.000121191	evgHyS_ScswcV5_1783.g7120.t1.p1	PREDICTED: beta-1,3-galactosyltransferase 1-like [Acropora digitifera]	1.46e-63	Hexosyltransferase	B3GNT4	galactosyltransferase activity	protein glycosylation	Golgi membrane
GENE.evgHyS_ScswcV5_66.g385.t1~~evgHyS_ScswcV5_66.g385.t1.p1	6.06065	1.29976	3.1181e-06	0.000131347	evgHyS_ScswcV5_66.g385.t1.p1	PREDICTED: uncharacterized protein LOC100202039 [Hydra vulgaris]	5.8e-23	NA	NA	NA	NA	NA
GENE.evgHyS_ScswcV5_807.g3543.t1~~evgHyS_ScswcV5_807.g3543.t1.p1	4.02863	0.865189	3.21858e-06	0.000134982	evgHyS_ScswcV5_807.g3543.t1.p1	neurocalcin homolog [Mizuhopecten yessoensis]	6.18e-61	Neurocalcin	HPCAL4	calcium ion binding	signal transduction	cytosol
GENE.evgMSTRG.20705.1~~evgMSTRG.20705.1.p1	4.46502	0.961386	3.41129e-06	0.000142436	evgMSTRG.20705.1.p1	PREDICTED: GATS-like protein 1 [Hydra vulgaris]	1.41e-167	GATS-like protein 2	NA	identical protein binding	negative regulation of TORC1 signaling	GATOR2 complex
GENE.evgHyS_ScswcV5_3094.g12204.t1~~evgHyS_ScswcV5_3094.g12204.t1.p1	3.29834	0.710809	3.47959e-06	0.000144339	evgHyS_ScswcV5_3094.g12204.t1.p1	adhesion G protein-coupled receptor L1-like isoform X1 [Pocillopora damicornis]	7.2e-24	NA	NA	NA	NA	NA
GENE.evgHyS_ScswcV5_2556.g10361.t1~~evgHyS_ScswcV5_2556.g10361.t1.p1	3.21561	0.693352	3.52186e-06	0.000145458	evgHyS_ScswcV5_2556.g10361.t1.p1	PREDICTED: probable glutamate receptor [Hydra vulgaris]	8.4e-57	NA	NA	NA	NA	NA
GENE.evgMSTRG.20731.1~~evgMSTRG.20731.1.p1	5.32265	1.14877	3.59798e-06	0.00014828	evgMSTRG.20731.1.p1	PREDICTED: slit homolog 2 protein isoform X1 [Hippocampus comes]	2.74e-21	NA	NA	NA	NA	NA
GENE.evgHyS_ScswcV5_3339.g14051.t1~~evgHyS_ScswcV5_3339.g14051.t1.p1	3.45473	0.747869	3.84778e-06	0.000157892	evgHyS_ScswcV5_3339.g14051.t1.p1	predicted protein [Nematostella vectensis]	9.79e-130	NA	NA	NA	NA	NA
GENE.evgMSTRG.4621.1~~evgMSTRG.4621.1.p1	5.99969	1.30402	4.20659e-06	0.000169689	evgMSTRG.4621.1.p1	hypothetical protein AWC38_SpisGene15845 [Stylophora pistillata]	6.58e-60	NA	NA	NA	NA	NA
GENE.evgHyS_ScswcV5_3094.g12225.t1~~evgHyS_ScswcV5_3094.g12225.t1.p1	4.15098	0.902477	4.23422e-06	0.000170083	evgHyS_ScswcV5_3094.g12225.t1.p1	PREDICTED: MATH and LRR domain-containing protein PFE0570w-like [Hydra vulgaris]	2e-143	NA	NA	NA	NA	NA
GENE.evgtrinLocDN31559c0g1t14~~evgtrinLocDN31559c0g1t14.p1	8.57898	1.86934	4.44696e-06	0.000177329	evgtrinLocDN31559c0g1t14.p1	PREDICTED: tigger transposable element-derived protein 4-like [Acropora digitifera]	2.71e-19	NA	NA	NA	NA	NA
GENE.evgtrinLocDN4524c3g1t11~~evgtrinLocDN4524c3g1t11.p1	5.63202	1.22726	4.45184e-06	0.000177329	evgtrinLocDN4524c3g1t11.p1	adrenocorticotropic hormone receptor-like [Pocillopora damicornis]	0.011	NA	NA	NA	NA	NA
GENE.evgMSTRG.70836.1~~evgMSTRG.70836.1.p1	4.80681	1.04999	4.69567e-06	0.000184722	evgMSTRG.70836.1.p1	predicted protein [Nematostella vectensis]	8.54e-37	NA	NA	NA	NA	NA
GENE.evgHyS_ScswcV5_4378.g20720.t1~~evgHyS_ScswcV5_4378.g20720.t1.p1	9.19129	2.01369	5.0094e-06	0.000196253	evgHyS_ScswcV5_4378.g20720.t1.p1	PREDICTED: uncharacterized protein LOC101238080 [Hydra vulgaris]	9.67e-07	NA	NA	NA	NA	NA
GENE.evgHyS_ScswcV5_1734.g5982.t1~~evgHyS_ScswcV5_1734.g5982.t1.p1	4.99793	1.0955	5.06136e-06	0.000197882	evgHyS_ScswcV5_1734.g5982.t1.p1	PREDICTED: sodium-dependent neutral amino acid transporter B(0)AT3-like isoform X1 [Hydra vulgaris]	0	Sodium-and chloride-dependent GABA transporter 2	NA	neurotransmitter:sodium symporter activity	neurotransmitter transport	integral component of plasma membrane
GENE.evgtrinLocDN564c1g1t3~~evgtrinLocDN564c1g1t3.p1	5.88725	1.29215	5.20952e-06	0.000202427	evgtrinLocDN564c1g1t3.p1	Extracellular calcium-sensing receptor [Stylophora pistillata]	1.29e-31	NA	NA	NA	NA	NA
GENE.evgtrinLocDN40452c0g2t1~~evgtrinLocDN40452c0g2t1.p1	5.26757	1.15856	5.45025e-06	0.000210492	evgtrinLocDN40452c0g2t1.p1	uncharacterized protein LOC110069050 [Orbicella faveolata]	4.48e-22	NA	NA	NA	NA	NA
GENE.evgtrinLocDN137c4g1t2~~evgtrinLocDN137c4g1t2.p1	2.58013	0.568445	5.6539e-06	0.000217037	evgtrinLocDN137c4g1t2.p1	PREDICTED: sequestosome-1-like [Hydra vulgaris]	1.33e-10	NA	NA	NA	NA	NA
GENE.evgtrinLocDN12728c0g1t9~~evgtrinLocDN12728c0g1t9.p2	8.55634	1.88555	5.68298e-06	0.000217714	NA	NA	NA	NA	NA	NA	NA	NA
GENE.evgHyS_ScswcV5_457.g1790.t1~~evgHyS_ScswcV5_457.g1790.t1.p1	3.97469	0.877905	5.96946e-06	0.000227773	evgHyS_ScswcV5_457.g1790.t1.p1	PREDICTED: uncharacterized protein LOC101239572 [Hydra vulgaris]	5.66e-69	NA	NA	NA	NA	NA
GENE.evgtrinLocDN29494c0g1t2~~evgtrinLocDN29494c0g1t2.p1	4.63327	1.02376	6.01864e-06	0.00022919	evgtrinLocDN29494c0g1t2.p1	PREDICTED: uncharacterized protein LOC105847494, partial [Hydra vulgaris]	3.7	NA	NA	NA	NA	NA
GENE.evgHyS_ScswcV5_3339.g14094.t1~~evgHyS_ScswcV5_3339.g14094.t1.p1	4.71847	1.04445	6.25315e-06	0.0002367	evgHyS_ScswcV5_3339.g14094.t1.p1	uncharacterized protein LOC111337906 [Stylophora pistillata]	1.65e-68	NA	NA	NA	NA	NA
GENE.evgHyS_ScswcV5_1733.g5612.t1~~evgHyS_ScswcV5_1733.g5612.t1.p1	7.74311	1.7147	6.31019e-06	0.000238046	evgHyS_ScswcV5_1733.g5612.t1.p1	PREDICTED: S-adenosylmethionine synthase isoform type-1-like [Hydra vulgaris]	1.75e-111	NA	NA	NA	NA	NA
GENE.evgtrinLocDN1009c1g1t7~~evgtrinLocDN1009c1g1t7.p2	8.04227	1.78105	6.31782e-06	0.000238046	evgtrinLocDN1009c1g1t7.p2	PREDICTED: melanocyte-stimulating hormone receptor-like [Hydra vulgaris]	1.48e-48	NA	NA	NA	NA	NA
GENE.evgtrinLocDN22710c0g1t5~~evgtrinLocDN22710c0g1t5.p1	6.13649	1.35943	6.36146e-06	0.0002389	NA	NA	NA	NA	NA	NA	NA	NA
GENE.evgHyS_ScswcV5_2427.g9076.t1~~evgHyS_ScswcV5_2427.g9076.t1.p1	3.41054	0.75751	6.72202e-06	0.000250095	evgHyS_ScswcV5_2427.g9076.t1.p1	PREDICTED: low-density lipoprotein receptor-related protein 2-like isoform X2 [Hydra vulgaris]	0	NA	NA	NA	NA	NA
GENE.evgtrinLocDN18034c0g1t4~~evgtrinLocDN18034c0g1t4.p1	5.46483	1.21709	7.12e-06	0.000262329	evgtrinLocDN18034c0g1t4.p1	PREDICTED: ras-GEF domain-containing family member 1C-like [Hydra vulgaris]	9.16e-123	Ras-GEF domain-containing family member	NA	guanyl-nucleotide exchange factor activity	small GTPase mediated signal transduction	integral component of membrane
GENE.evgMSTRG.130878.1~~evgMSTRG.130878.1.p1	7.5674	1.68691	7.25876e-06	0.000266294	evgMSTRG.130878.1.p1	predicted protein [Nematostella vectensis]	1.62e-05	NA	NA	NA	NA	NA
GENE.evgtrinLocDN23863c0g1t10~~evgtrinLocDN23863c0g1t10.p1	6.19578	1.38503	7.69853e-06	0.000280805	evgtrinLocDN23863c0g1t10.p1	c-like opsin [Tripedalia cystophora]	1.57e-21	NA	NA	NA	NA	NA
GENE.evgHyS_ScswcV5_2427.g9124.t1~~evgHyS_ScswcV5_2427.g9124.t1.p1	2.85399	0.63843	7.81011e-06	0.00028433	evgHyS_ScswcV5_2427.g9124.t1.p1	PREDICTED: sequestosome-1-like [Hydra vulgaris]	8.07e-44	NA	NA	NA	NA	NA
GENE.evgHyS_ScswcV5_98.g818.t1~~evgHyS_ScswcV5_98.g818.t1.p1	2.96684	0.663925	7.87182e-06	0.00028603	evgHyS_ScswcV5_98.g818.t1.p1	PREDICTED: zinc finger FYVE domain-containing protein 1 [Hydra vulgaris]	0	Zinc finger FYVE domain-containing protein 1	ZFYVE1	metal ion binding	negative regulation of phosphatase activity	omegasome
GENE.evgHyS_ScswcV5_1733.g5630.t1~~evgHyS_ScswcV5_1733.g5630.t1.p1	4.94084	1.10703	8.07671e-06	0.000291251	evgHyS_ScswcV5_1733.g5630.t1.p1	PREDICTED: uncharacterized protein LOC105850989 [Hydra vulgaris]	1.78e-86	Potassium voltage-gated channel subfamily KQT	NA	potassium channel activity	potassium ion transmembrane transport	voltage-gated potassium channel complex
GENE.evgMSTRG.128787.1~~evgMSTRG.128787.1.p1	8.72899	1.95842	8.30561e-06	0.000298375	evgMSTRG.128787.1.p1	PREDICTED: histamine H2 receptor-like [Acropora digitifera]	0.003	NA	NA	NA	NA	NA
GENE.evgMSTRG.41111.7~~evgMSTRG.41111.7.p1	3.75262	0.842691	8.46252e-06	0.000302869	evgMSTRG.41111.7.p1	PREDICTED: contactin-2-like isoform X1 [Hydra vulgaris]	0	Contactin-2 (Fragment)	NA	protein kinase activity	transmission of nerve impulse	integral component of membrane
GENE.evgMSTRG.20932.1~~evgMSTRG.20932.1.p1	6.81037	1.52996	8.53399e-06	0.000304854	evgMSTRG.20932.1.p1	Dynein heavy chain 10, axonemal [Exaiptasia pallida]	0	NA	NA	NA	NA	NA
GENE.evgHyS_ScswcV5_1004.g4146.t1~~evgHyS_ScswcV5_1004.g4146.t1.p1	3.9234	0.882157	8.68712e-06	0.000309164	evgHyS_ScswcV5_1004.g4146.t1.p1	PREDICTED: synaptotagmin-15-like [Hydra vulgaris]	9.22e-136	Synaptotagmin XV	SYT15	calcium-dependent phospholipid binding	regulation of dopamine secretion	extrinsic component of membrane
GENE.evgtrinLocDN5958c1g1t15~~evgtrinLocDN5958c1g1t15.p1	3.50847	0.790599	9.09078e-06	0.000321071	evgtrinLocDN5958c1g1t15.p1	PREDICTED: uncharacterized protein LOC105843520 [Hydra vulgaris]	5.63e-64	NA	NA	NA	NA	NA
GENE.evgHyS_ScswcV5_66.g529.t1~~evgHyS_ScswcV5_66.g529.t1.p1	3.02455	0.681607	9.106e-06	0.000321071	evgHyS_ScswcV5_66.g529.t1.p1	PREDICTED: LOW QUALITY PROTEIN: transmembrane 9 superfamily member 2-like [Hydra vulgaris]	0	Transmembrane 9 superfamily protein member 5	NA	NA	negative regulation of peptidoglycan recognition protein signaling pathway	integral component of membrane
GENE.evgHyS_ScswcV5_4934.g22014.t1~~evgHyS_ScswcV5_4934.g22014.t1.p1	4.5392	1.02358	9.22204e-06	0.000324561	evgHyS_ScswcV5_4934.g22014.t1.p1	potassium voltage-gated channel protein Shaw-like [Exaiptasia pallida]	1.03e-149	Voltage-gated potassium channel alpha subunit	KCNB1	voltage-gated potassium channel activity	protein homooligomerization	voltage-gated potassium channel complex
GENE.evgHyS_ScswcV5_2067.g8151.t1~~evgHyS_ScswcV5_2067.g8151.t1.p1	3.29523	0.748996	1.08484e-05	0.000376237	evgHyS_ScswcV5_2067.g8151.t1.p1	probable voltage-dependent N-type calcium channel subunit alpha-1B isoform X4 [Orbicella faveolata]	0	Voltage-dependent calcium channel type A subunit alpha-1	NA	voltage-gated calcium channel activity	regulation of ion transmembrane transport	voltage-gated calcium channel complex
GENE.evgtrinLocDN4074c3g1t8~~evgtrinLocDN4074c3g1t8.p1	7.53218	1.71242	1.08971e-05	0.000377239	evgtrinLocDN4074c3g1t8.p1	hypothetical protein UY44_C0009G0026 [Candidatus Kaiserbacteria bacterium GW2011_GWA2_49_19]	0.8	NA	NA	NA	NA	NA
GENE.evgtrinLocDN19008c0g1t7~~evgtrinLocDN19008c0g1t7.p1	4.06531	0.926436	1.14338e-05	0.0003951	evgtrinLocDN19008c0g1t7.p1	PREDICTED: integral membrane protein DGCR2/IDD [Serinus canaria]	1.5	NA	NA	NA	NA	NA
GENE.evgtrinLocDN14728c0g1t5~~evgtrinLocDN14728c0g1t5.p1	5.55106	1.26636	1.168e-05	0.000400697	evgtrinLocDN14728c0g1t5.p1	allatostatin-A receptor-like [Pocillopora damicornis]	0.000201	NA	NA	NA	NA	NA
GENE.evgMSTRG.127165.1~~evgMSTRG.127165.1.p1	5.14559	1.17599	1.21139e-05	0.000413349	evgMSTRG.127165.1.p1	PREDICTED: 2-hydroxyacyl-CoA lyase 1 isoform X1 [Saimiri boliviensis boliviensis]	0	2-hydroxyphytanoyl-CoA lyase	HACL1	thiamine pyrophosphate binding	fatty acid alpha-oxidation	peroxisome
GENE.evgtrinLocDN30446c1g1t16~~evgtrinLocDN30446c1g1t16.p1	6.97333	1.59543	1.23777e-05	0.000420091	evgtrinLocDN30446c1g1t16.p1	gamma-aminobutyric acid receptor subunit beta-1-like [Stylophora pistillata]	4.61e-51	Gamma-aminobutyric acid receptor subunit beta	NA	extracellular ligand-gated ion channel activity	ion transmembrane transport	plasma membrane
GENE.evgtrinLocDN5594c0g1t13~~evgtrinLocDN5594c0g1t13.p1	3.37169	0.771947	1.2552e-05	0.000422506	evgtrinLocDN5594c0g1t13.p1	PREDICTED: nicotinamidase-like [Hydra vulgaris]	2.41e-96	Nicotinamide amidase	NA	calcium ion binding	determination of adult lifespan	exosome (RNase complex)
GENE.evgHyS_ScswcV5_2556.g10187.t1~~evgHyS_ScswcV5_2556.g10187.t1.p1	4.02833	0.922311	1.25592e-05	0.000422506	evgHyS_ScswcV5_2556.g10187.t1.p1	PREDICTED: synapsin-2-like [Hydra vulgaris]	1.89e-154	Synapsin Ib	SYN1	ATP binding	neurotransmitter secretion	synaptic vesicle
GENE.evgHyS_ScswcV5_1783.g7274.t1~~evgHyS_ScswcV5_1783.g7274.t1.p1	4.65754	1.06693	1.26906e-05	0.000424125	evgHyS_ScswcV5_1783.g7274.t1.p1	PREDICTED: protein RFT1 homolog [Hydra vulgaris]	3.34e-60	NA	NA	NA	NA	NA
GENE.evgMSTRG.90273.1~~evgMSTRG.90273.1.p2	7.20713	1.65102	1.2697e-05	0.000424125	evgMSTRG.90273.1.p2	hypothetical protein CAPTEDRAFT_211147, partial [Capitella teleta]	0.000162	NA	NA	NA	NA	NA
GENE.evgHyS_ScswcV5_3781.g16331.t1~~evgHyS_ScswcV5_3781.g16331.t1.p1	2.99428	0.686426	1.28803e-05	0.000429493	evgHyS_ScswcV5_3781.g16331.t1.p1	kinesin-like protein KIF16B isoform X3 [Stylophora pistillata]	0	Kinesin family member 16Ba	KIF16B	motor activity	microtubule-based movement	phagocytic vesicle
GENE.evgHyS_ScswcV5_3298.g13257.t1~~evgHyS_ScswcV5_3298.g13257.t1.p1	2.93718	0.673468	1.29308e-05	0.000430244	evgHyS_ScswcV5_3298.g13257.t1.p1	C-Maf-inducing protein-like isoform X2 [Orbicella faveolata]	0	C-Maf-inducing protein isoform 1	NA	ubiquitin-protein transferase activity	SCF-dependent proteasomal ubiquitin-dependent protein catabolic process	SCF ubiquitin ligase complex
GENE.evgMSTRG.60128.1~~evgMSTRG.60128.1.p1	6.44305	1.48114	1.36097e-05	0.000447544	evgMSTRG.60128.1.p1	PREDICTED: uncharacterized protein LOC104944096 [Notothenia coriiceps]	5.38e-14	NA	NA	NA	NA	NA
GENE.evgHyS_ScswcV5_2402.g8829.t1~~evgHyS_ScswcV5_2402.g8829.t1.p1	6.70252	1.54422	1.42229e-05	0.000462122	NA	NA	NA	NA	NA	NA	NA	NA
GENE.evgHyS_ScswcV5_4270.g20040.t1~~evgHyS_ScswcV5_4270.g20040.t1.p1	3.34399	0.771393	1.45757e-05	0.000472778	evgHyS_ScswcV5_4270.g20040.t1.p1	PREDICTED: guanine nucleotide exchange factor DBS-like isoform X1 [Hydra vulgaris]	0	Guanine nucleotide exchange factor DBS	NA	Rho guanyl-nucleotide exchange factor activity	regulation of Rho protein signal transduction	integral component of membrane
GENE.evgHyS_ScswcV5_3153.g12527.t1~~evgHyS_ScswcV5_3153.g12527.t1.p1	4.49759	1.03867	1.49e-05	0.000479719	evgHyS_ScswcV5_3153.g12527.t1.p1	PREDICTED: ubiquitin carboxyl-terminal hydrolase 5-like [Hydra vulgaris]	1.06e-168	NA	NA	NA	NA	NA
GENE.evgMSTRG.106974.1~~evgMSTRG.106974.1.p1	4.58674	1.06137	1.54965e-05	0.000496723	evgMSTRG.106974.1.p1	PREDICTED: probable 3',5'-cyclic phosphodiesterase pde-5 [Hydra vulgaris]	0	Phosphodiesterase	NA	3',5'-cyclic-nucleotide phosphodiesterase activity	signal transduction	perikaryon
GENE.evgMSTRG.73408.1~~evgMSTRG.73408.1.p1	8.45741	1.96143	1.61896e-05	0.000516331	evgMSTRG.73408.1.p1	hypothetical protein CAPTEDRAFT_211147, partial [Capitella teleta]	1.66e-11	NA	NA	NA	NA	NA
GENE.evgHyS_ScswcV5_3094.g12221.t1~~evgHyS_ScswcV5_3094.g12221.t1.p1	4.5368	1.05375	1.6671e-05	0.000528146	evgHyS_ScswcV5_3094.g12221.t1.p1	PREDICTED: probable glutamate receptor [Hydra vulgaris]	5.92e-47	Glutamate receptor ionotropic, NMDA 1	NA	ionotropic glutamate receptor activity	ionotropic glutamate receptor signaling pathway	postsynaptic membrane
GENE.evgHyS_ScswcV5_2333.g8546.t1~~evgHyS_ScswcV5_2333.g8546.t1.p1	2.87779	0.670804	1.78621e-05	0.000558183	evgHyS_ScswcV5_2333.g8546.t1.p1	PREDICTED: methylosome protein 50-like [Hydra vulgaris]	1.51e-83	NA	NA	NA	NA	NA
GENE.evgtrinLocDN24496c0g1t8~~evgtrinLocDN24496c0g1t8.p1	5.07219	1.18238	1.78829e-05	0.000558183	evgtrinLocDN24496c0g1t8.p1	melanocyte-stimulating hormone receptor-like [Pocillopora damicornis]	1.53e-12	NA	NA	NA	NA	NA
GENE.evgtrinLocDN15792c0g1t1~~evgtrinLocDN15792c0g1t1.p1	5.20978	1.215	1.80391e-05	0.000562134	evgtrinLocDN15792c0g1t1.p1	hypothetical protein RP20_CCG011297 [Aedes albopictus]	9.4e-08	NA	NA	NA	NA	NA
GENE.evgtrinLocDN116505c0g1t6~~evgtrinLocDN116505c0g1t6.p1	6.7695	1.57967	1.82425e-05	0.000566734	evgtrinLocDN116505c0g1t6.p1	FtsX-like permease family protein [Methylacidiphilum fumariolicum]	2.6	NA	NA	NA	NA	NA
GENE.evgMSTRG.75167.1~~evgMSTRG.75167.1.p1	6.85249	1.59941	1.8325e-05	0.000568253	evgMSTRG.75167.1.p1	hypothetical protein ASC65_11255 [Brevundimonas sp. Root1279]	1.4	NA	NA	NA	NA	NA
GENE.evgtrinLocDN83667c0g1t4~~evgtrinLocDN83667c0g1t4.p1	3.26274	0.762582	1.8812e-05	0.00058146	evgtrinLocDN83667c0g1t4.p1	PREDICTED: carboxypeptidase D-like isoform X2 [Hydra vulgaris]	1.9e-159	Carboxypeptidase D	CPD	metallocarboxypeptidase activity	proteolysis	extracellular space
GENE.evgMSTRG.119304.33~~evgMSTRG.119304.33.p1	2.69313	0.630925	1.9676e-05	0.000605221	evgMSTRG.119304.33.p1	voltage-dependent N-type calcium channel subunit alpha-1B-like isoform X2 [Pocillopora damicornis]	0	Voltage-dependent N-type calcium channel subunit alpha	CACNA1B	voltage-gated calcium channel activity	calcium ion transmembrane transport	voltage-gated calcium channel complex
GENE.evgHyS_ScswcV5_1907.g7819.t1~~evgHyS_ScswcV5_1907.g7819.t1.p1	3.01764	0.707415	1.99248e-05	0.000610899	evgHyS_ScswcV5_1907.g7819.t1.p1	PREDICTED: glutamate--cysteine ligase catalytic subunit-like [Hydra vulgaris]	0	Glutamate--cysteine ligase catalytic subunit	GCLC	glutamate-cysteine ligase activity	glutathione biosynthetic process	glutamate-cysteine ligase complex
GENE.evgMSTRG.20581.1~~evgMSTRG.20581.1.p1	7.43911	1.74827	2.08936e-05	0.000633462	evgMSTRG.20581.1.p1	adenosine receptor A2a-like [Orbicella faveolata]	0.12	NA	NA	NA	NA	NA
GENE.evgMSTRG.50858.2~~evgMSTRG.50858.2.p1	4.70599	1.10847	2.18124e-05	0.000656096	evgMSTRG.50858.2.p1	PREDICTED: histamine H2 receptor-like [Hydra vulgaris]	1.96e-109	Seven transmembrane protein	NA	G protein-coupled receptor activity	G protein-coupled receptor signaling pathway	integral component of membrane
GENE.evgtrinLocDN12701c0g1t2~~evgtrinLocDN12701c0g1t2.p1	3.24956	0.766891	2.26203e-05	0.000677186	evgtrinLocDN12701c0g1t2.p1	PREDICTED: gastrula zinc finger protein XlCGF57.1-like [Hydra vulgaris]	1.03e-121	Zinc finger protein 436	NA	nucleic acid binding	regulation of transcription, DNA-templated	nucleus
GENE.evgHyS_ScswcV5_3062.g11992.t1~~evgHyS_ScswcV5_3062.g11992.t1.p1	3.60583	0.85288	2.35964e-05	0.000703093	evgHyS_ScswcV5_3062.g11992.t1.p1	PREDICTED: uncharacterized protein LOC100198707 [Hydra vulgaris]	0	S-adenosyl-L-methionine-dependent methyltransferase	NA	methyltransferase activity	lipid biosynthetic process	integral component of membrane
GENE.evgtrinLocDN1817c0g1t7~~evgtrinLocDN1817c0g1t7.p1	5.00191	1.18422	2.40208e-05	0.000711284	evgtrinLocDN1817c0g1t7.p1	uncharacterized protein LOC111330387 [Stylophora pistillata]	8.21e-34	Provirus ancestral Pol-like protein (Fragment)	NA	nucleic acid binding	DNA integration	NA
GENE.evgtrinLocDN44995c1g1t4~~evgtrinLocDN44995c1g1t4.p1	5.46724	1.29581	2.45194e-05	0.000724912	evgtrinLocDN44995c1g1t4.p1	spermidine/putrescine ABC transporter, permease protein PotB family protein [Staphylococcus warneri VCU121]	0.47	NA	NA	NA	NA	NA
GENE.evgtrinLocDN45777c0g1t7~~evgtrinLocDN45777c0g1t7.p1	7.69768	1.82577	2.48535e-05	0.000732524	evgtrinLocDN45777c0g1t7.p1	uncharacterized protein LOC113682553 [Pocillopora damicornis]	6.58e-13	NA	NA	NA	NA	NA
GENE.evgtrinLocDN1310c0g1t8~~evgtrinLocDN1310c0g1t8.p1	9.30302	2.2089	2.53566e-05	0.000743897	evgtrinLocDN1310c0g1t8.p1	hypothetical protein DRR08_10715 [Gammaproteobacteria bacterium]	2.4	NA	NA	NA	NA	NA
GENE.evgHyS_ScswcV5_2548.g10136.t1~~evgHyS_ScswcV5_2548.g10136.t1.p1	6.21325	1.47571	2.54984e-05	0.000746908	evgHyS_ScswcV5_2548.g10136.t1.p1	PREDICTED: arrestin domain-containing protein 3-like [Hydra vulgaris]	4.71e-36	NA	NA	NA	NA	NA
GENE.evgtrinLocDN65667c0g1t11~~evgtrinLocDN65667c0g1t11.p1	3.41463	0.81312	2.67605e-05	0.000777357	evgtrinLocDN65667c0g1t11.p1	PREDICTED: uncharacterized protein LOC100205133 [Hydra vulgaris]	4.45e-48	NA	NA	NA	NA	NA
GENE.evgMSTRG.3181.17~~evgMSTRG.3181.17.p1	3.34328	0.797083	2.73598e-05	0.000792892	evgMSTRG.3181.17.p1	voltage-dependent T-type calcium channel subunit alpha-1H-like [Exaiptasia pallida]	0	Voltage-dependent T-type calcium channel subunit alpha	NA	voltage-gated calcium channel activity	calcium ion transmembrane transport	voltage-gated calcium channel complex
GENE.evgHyS_ScswcV5_26.g216.t1~~evgHyS_ScswcV5_26.g216.t1.p1	6.54396	1.56349	2.84578e-05	0.000819724	evgHyS_ScswcV5_26.g216.t1.p1	PREDICTED: ATP-sensitive inward rectifier potassium channel 12-like [Pundamilia nyererei]	9.2e-99	Inwardly-rectifying potassium channel	KCNJ12	inward rectifier potassium channel activity	regulation of ion transmembrane transport	integral component of membrane
GENE.evgtrinLocDN84010c0g1t7~~evgtrinLocDN84010c0g1t7.p1	5.0432	1.2053	2.86183e-05	0.000823101	evgtrinLocDN84010c0g1t7.p1	PREDICTED: rhodopsin, GQ-coupled-like [Hydra vulgaris]	2.42e-26	NA	NA	NA	NA	NA
GENE.evgHyS_ScswcV5_4270.g19675.t1~~evgHyS_ScswcV5_4270.g19675.t1.p1	5.48573	1.31325	2.95081e-05	0.000843594	evgHyS_ScswcV5_4270.g19675.t1.p1	PREDICTED: mechanosensory protein 2-like [Hydra vulgaris]	1.55e-146	NA	NA	NA	NA	NA
GENE.evgtrinLocDN14815c2g1t1~~evgtrinLocDN14815c2g1t1.p1	8.87413	2.12801	3.04391e-05	0.000867605	evgtrinLocDN14815c2g1t1.p1	hypothetical protein [Ferrovum sp. JA12]	0.48	NA	NA	NA	NA	NA
GENE.evgHyS_ScswcV5_4051.g18342.t1~~evgHyS_ScswcV5_4051.g18342.t1.p1	2.76245	0.663646	3.14732e-05	0.000893071	evgHyS_ScswcV5_4051.g18342.t1.p1	PREDICTED: autophagy-related protein 2 homolog B isoform X1 [Hydra vulgaris]	0	Autophagy-related protein 2 homolog B	NA	protein binding	autophagy	cytosol
GENE.evgMSTRG.130187.1~~evgMSTRG.130187.1.p1	8.99815	2.16202	3.15593e-05	0.00089329	evgMSTRG.130187.1.p1	predicted protein [Nematostella vectensis]	3.2	NA	NA	NA	NA	NA
GENE.evgHyS_ScswcV5_2566.g10678.t1~~evgHyS_ScswcV5_2566.g10678.t1.p1	4.73339	1.1401	3.29981e-05	0.000927147	evgHyS_ScswcV5_2566.g10678.t1.p1	gamma-aminobutyric acid receptor subunit beta-3-like [Exaiptasia pallida]	2.25e-50	Glycine receptor subunit alphaZ1	NA	extracellular ligand-gated ion channel activity	ion transmembrane transport	plasma membrane
GENE.evgHyS_ScswcV5_704.g3203.t1~~evgHyS_ScswcV5_704.g3203.t1.p1	2.54251	0.612467	3.30637e-05	0.000927147	evgHyS_ScswcV5_704.g3203.t1.p1	PREDICTED: 1-phosphatidylinositol 4,5-bisphosphate phosphodiesterase gamma-1-like [Hydra vulgaris]	0	1-phosphatidylinositol 4,5-bisphosphate phosphodiesterase gamma	PLCG2	phosphatidylinositol phospholipase C activity	phospholipid catabolic process	cytosol
GENE.evgMSTRG.46892.1~~evgMSTRG.46892.1.p2	7.66773	1.84737	3.31572e-05	0.0009284	evgMSTRG.46892.1.p2	trace amine-associated receptor 13c-like [Mastacembelus armatus]	0.011	NA	NA	NA	NA	NA
GENE.evgMSTRG.101721.1~~evgMSTRG.101721.1.p1	7.36218	1.77416	3.3294e-05	0.000930862	evgMSTRG.101721.1.p1	olfactory receptor 14J1-like [Loxodonta africana]	0.11	NA	NA	NA	NA	NA
GENE.evgHyS_ScswcV5_4037.g18029.t1~~evgHyS_ScswcV5_4037.g18029.t1.p1	3.00487	0.725962	3.4858e-05	0.000970317	evgHyS_ScswcV5_4037.g18029.t1.p1	calsyntenin-1-like [Exaiptasia pallida]	2.49e-32	NA	NA	NA	NA	NA
GENE.evgtrinLocDN22086c2g1t11~~evgtrinLocDN22086c2g1t11.p1	5.42918	1.31329	3.56451e-05	0.000985024	evgtrinLocDN22086c2g1t11.p1	PREDICTED: uncharacterized protein LOC101234383 [Hydra vulgaris]	5.89e-53	NA	NA	NA	NA	NA
GENE.evgMSTRG.85415.3~~evgMSTRG.85415.3.p1	3.14843	0.76239	3.63271e-05	0.000996641	evgMSTRG.85415.3.p1	PREDICTED: potassium voltage-gated channel subfamily C member 1-like isoform X1 [Hydra vulgaris]	1.82e-150	Noninactivating potassium channel	KCNC4	voltage-gated potassium channel activity	regulation of ion transmembrane transport	voltage-gated potassium channel complex
GENE.evgtrinLocDN28847c0g1t11~~evgtrinLocDN28847c0g1t11.p2	5.76536	1.39773	3.71068e-05	0.00101657	evgtrinLocDN28847c0g1t11.p2	PREDICTED: UDP-GlcNAc:betaGal beta-1,3-N-acetylglucosaminyltransferase 6-like [Hydra vulgaris]	4.11e-115	Hexosyltransferase	NA	galactosyltransferase activity	protein glycosylation	Golgi membrane
GENE.evgHyS_ScswcV5_2556.g10165.t1~~evgHyS_ScswcV5_2556.g10165.t1.p1	2.54673	0.6175	3.7193e-05	0.00101746	evgHyS_ScswcV5_2556.g10165.t1.p1	PREDICTED: uncharacterized protein LOC100198221 isoform X1 [Hydra vulgaris]	9.53e-80	NA	NA	NA	NA	NA
GENE.evgtrinLocDN16748c0g1t1~~evgtrinLocDN16748c0g1t1.p1	8.47367	2.05535	3.74388e-05	0.00102272	evgtrinLocDN16748c0g1t1.p1	hypothetical protein RhiirC2_719225 [Rhizophagus irregularis]	5.9e-05	NA	NA	NA	NA	NA
GENE.evgMSTRG.65047.1~~evgMSTRG.65047.1.p1	3.3821	0.822701	3.94006e-05	0.00106864	evgMSTRG.65047.1.p1	PREDICTED: cysteinyl leukotriene receptor 2-like [Hydra vulgaris]	1.05e-80	Neuropeptide FF receptor 2	NA	G protein-coupled receptor activity	G protein-coupled receptor signaling pathway	endosome
GENE.evgHyS_ScswcV5_366.g1356.t1~~evgHyS_ScswcV5_366.g1356.t1.p1	3.48924	0.851147	4.14122e-05	0.00111055	evgHyS_ScswcV5_366.g1356.t1.p1	DUF4850 domain-containing protein [Pasteurella dagmatis]	1.1	NA	NA	NA	NA	NA
GENE.evgHyS_ScswcV5_3339.g13973.t1~~evgHyS_ScswcV5_3339.g13973.t1.p1	2.44398	0.596445	4.1748e-05	0.00111798	evgHyS_ScswcV5_3339.g13973.t1.p1	PREDICTED: diacylglycerol kinase 1-like [Hydra vulgaris]	0	Diacylglycerol kinase gamma	DGKG	diacylglycerol kinase activity	protein kinase C-activating G protein-coupled receptor signaling pathway	plasma membrane
GENE.evgMSTRG.52374.1~~evgMSTRG.52374.1.p1	7.60104	1.85551	4.1951e-05	0.00112183	evgMSTRG.52374.1.p1	PREDICTED: probable G-protein coupled receptor 34 [Hydra vulgaris]	1.12e-76	Neuropeptide Y receptor type 1	NA	neuropeptide receptor activity	neuropeptide signaling pathway	integral component of membrane
GENE.evgHyS_ScswcV5_3215.g13004.t1~~evgHyS_ScswcV5_3215.g13004.t1.p1	6.11051	1.49608	4.42006e-05	0.00117703	evgHyS_ScswcV5_3215.g13004.t1.p1	PREDICTED: gamma-aminobutyric acid receptor subunit rho-2-like [Hydra vulgaris]	1.04e-93	gamma-aminobutyric acid receptor subunit theta	NA	extracellular ligand-gated ion channel activity	ion transmembrane transport	plasma membrane
GENE.evgMSTRG.74630.1~~evgMSTRG.74630.1.p1	5.2168	1.28669	5.02584e-05	0.00131989	evgMSTRG.74630.1.p1	uncharacterized protein LOC111333545, partial [Stylophora pistillata]	4.28e-11	NA	NA	NA	NA	NA
GENE.evgMSTRG.129665.1~~evgMSTRG.129665.1.p1	6.81212	1.68236	5.14072e-05	0.00134265	evgMSTRG.129665.1.p1	DUF3427 domain-containing protein [Lactobacillus delbrueckii]	4	NA	NA	NA	NA	NA
GENE.evgHyS_ScswcV5_4789.g21869.t1~~evgHyS_ScswcV5_4789.g21869.t1.p1	7.33107	1.81152	5.1896e-05	0.00134986	evgHyS_ScswcV5_4789.g21869.t1.p1	hypothetical protein BOX15_Mlig021084g2 [Macrostomum lignano]	1.56e-113	Reverse transcriptase	RT	RNA-directed DNA polymerase activity	RNA-dependent DNA biosynthetic process	motile cilium
GENE.evgMSTRG.58152.3~~evgMSTRG.58152.3.p4	2.91722	0.7212	5.23338e-05	0.00135754	evgMSTRG.58152.3.p4	hypothetical protein AC249_AIPGENE2233 [Exaiptasia pallida]	6.21e-12	NA	NA	NA	NA	NA
GENE.evgMSTRG.65049.1~~evgMSTRG.65049.1.p1	4.72607	1.17013	5.36925e-05	0.00138524	evgMSTRG.65049.1.p1	PREDICTED: cysteinyl leukotriene receptor 2-like [Hydra vulgaris]	2.06e-88	Opsin	NA	G protein-coupled receptor activity	G protein-coupled receptor signaling pathway	integral component of membrane
GENE.evgMSTRG.114516.1~~evgMSTRG.114516.1.p2	4.81261	1.19295	5.47901e-05	0.00141164	evgMSTRG.114516.1.p2	unnamed protein product [Anisakis simplex]	6.3	NA	NA	NA	NA	NA
GENE.evgMSTRG.57281.1~~evgMSTRG.57281.1.p1	8.13391	2.01817	5.56946e-05	0.00143301	NA	NA	NA	NA	NA	NA	NA	NA
GENE.evgHyS_ScswcV5_3574.g15578.t1~~evgHyS_ScswcV5_3574.g15578.t1.p1	5.00325	1.24471	5.82913e-05	0.00149334	evgHyS_ScswcV5_3574.g15578.t1.p1	hypothetical protein pdam_00005562 [Pocillopora damicornis]	2.06e-52	NA	NA	NA	NA	NA
GENE.evgtrinLocDN28443c0g1t1~~evgtrinLocDN28443c0g1t1.p1	6.60945	1.64704	5.99686e-05	0.00152852	evgtrinLocDN28443c0g1t1.p1	PREDICTED: alpha-1A adrenergic receptor-like [Hydra vulgaris]	1.75e-07	NA	NA	NA	NA	NA
GENE.evgHyS_ScswcV5_2333.g8407.t1~~evgHyS_ScswcV5_2333.g8407.t1.p1	5.47951	1.36618	6.05069e-05	0.00153607	evgHyS_ScswcV5_2333.g8407.t1.p1	uncharacterized protein LOC113684566 [Pocillopora damicornis]	6.66e-14	Potassium two pore domain channel subfamily K member 16	KCNK16	potassium channel activity	potassium ion transmembrane transport	integral component of membrane
GENE.evgHyS_ScswcV5_3339.g13981.t1~~evgHyS_ScswcV5_3339.g13981.t1.p1	4.73312	1.18267	6.27918e-05	0.00157933	evgHyS_ScswcV5_3339.g13981.t1.p1	potassium voltage-gated channel subfamily A member 10-like [Exaiptasia pallida]	2.99e-92	Potassium voltage-gated channel protein Shal	NA	voltage-gated potassium channel activity	potassium ion transmembrane transport	voltage-gated potassium channel complex
GENE.evgMSTRG.25107.11~~evgMSTRG.25107.11.p3	4.3142	1.07828	6.30768e-05	0.00158441	evgMSTRG.25107.11.p3	uncharacterized protein LOC110247987 [Exaiptasia pallida]	0.00057	NA	NA	NA	NA	NA
GENE.evgtrinLocDN59815c0g1t1~~evgtrinLocDN59815c0g1t1.p1	7.96733	1.99415	6.45955e-05	0.00161616	NA	NA	NA	NA	NA	NA	NA	NA
GENE.evgMSTRG.90497.1~~evgMSTRG.90497.1.p1	6.67841	1.67346	6.58598e-05	0.00164347	evgMSTRG.90497.1.p1	neuromedin-K receptor-like [Pocillopora damicornis]	0.11	NA	NA	NA	NA	NA
GENE.evgtrinLocDN10935c0g1t15~~evgtrinLocDN10935c0g1t15.p1	6.96605	1.74885	6.79866e-05	0.00168917	evgtrinLocDN10935c0g1t15.p1	octopamine receptor 2 [Platynereis dumerilii]	1.04e-09	NA	NA	NA	NA	NA
GENE.evgtrinLocDN15909c0g1t9~~evgtrinLocDN15909c0g1t9.p2	8.83121	2.21817	6.8536e-05	0.00169912	evgtrinLocDN15909c0g1t9.p2	PREDICTED: alpha-1A adrenergic receptor-like [Hydra vulgaris]	6.78e-15	NA	NA	NA	NA	NA
GENE.evgHyS_ScswcV5_2427.g9084.t1~~evgHyS_ScswcV5_2427.g9084.t1.p1	2.95909	0.743789	6.93806e-05	0.00171337	evgHyS_ScswcV5_2427.g9084.t1.p1	von Willebrand factor A domain-containing protein 5B1 [Stylophora pistillata]	1.09e-84	NA	NA	NA	NA	NA
GENE.evgMSTRG.108730.1~~evgMSTRG.108730.1.p1	8.17827	2.0573	7.03052e-05	0.00173171	evgMSTRG.108730.1.p1	beta-1 adrenergic receptor-like [Pocillopora damicornis]	0.000106	NA	NA	NA	NA	NA
GENE.evgMSTRG.41500.1~~evgMSTRG.41500.1.p1	3.24792	0.817904	7.15634e-05	0.00175733	evgMSTRG.41500.1.p1	PREDICTED: extracellular calcium-sensing receptor-like [Hydra vulgaris]	1.33e-44	NA	NA	NA	NA	NA
GENE.evgHyS_ScswcV5_936.g3811.t1~~evgHyS_ScswcV5_936.g3811.t1.p1	4.78768	1.20571	7.16222e-05	0.00175733	evgHyS_ScswcV5_936.g3811.t1.p1	extracellular calcium-sensing receptor-like [Pocillopora damicornis]	1.1e-37	NA	NA	NA	NA	NA
GENE.evgHyS_ScswcV5_366.g1489.t1~~evgHyS_ScswcV5_366.g1489.t1.p1	2.6723	0.67309	7.18136e-05	0.00175785	evgHyS_ScswcV5_366.g1489.t1.p1	PREDICTED: voltage-dependent T-type calcium channel subunit alpha-1G-like [Hydra vulgaris]	0	Voltage-dependent T-type calcium channel subunit alpha	NA	voltage-gated calcium channel activity	calcium ion transmembrane transport	voltage-gated calcium channel complex
GENE.evgHyS_ScswcV5_4270.g19566.t1~~evgHyS_ScswcV5_4270.g19566.t1.p1	4.77874	1.20373	7.18903e-05	0.00175785	evgHyS_ScswcV5_4270.g19566.t1.p1	voltage-dependent calcium channel subunit alpha-2/delta-1-like [Pocillopora damicornis]	0	NA	NA	NA	NA	NA
GENE.evgtrinLocDN4483c1g1t7~~evgtrinLocDN4483c1g1t7.p1	7.84955	1.97919	7.30793e-05	0.00177705	evgtrinLocDN4483c1g1t7.p1	PREDICTED: alpha-1A adrenergic receptor-like [Hydra vulgaris]	0.000229	NA	NA	NA	NA	NA
GENE.evgMSTRG.15957.1~~evgMSTRG.15957.1.p1	2.69373	0.681951	7.81409e-05	0.00188091	evgMSTRG.15957.1.p1	PREDICTED: ras and EF-hand domain-containing protein homolog [Hydra vulgaris]	0	EF-hand calcium-binding domain-containing protein 4A	NA	GTPase activity	Rab protein signal transduction	neuronal cell body
GENE.evgtrinLocDN36219c0g2t4~~evgtrinLocDN36219c0g2t4.p1	7.49731	1.89972	7.92919e-05	0.00190381	evgtrinLocDN36219c0g2t4.p1	predicted protein [Fibroporia radiculosa]	9.42e-47	NA	NA	NA	NA	NA
GENE.evgMSTRG.48049.3~~evgMSTRG.48049.3.p1	2.97883	0.755021	7.96778e-05	0.00191066	NA	NA	NA	NA	NA	NA	NA	NA
GENE.evgtrinLocDN100134c0g1t2~~evgtrinLocDN100134c0g1t2.p1	8.66405	2.1962	7.97945e-05	0.00191088	evgtrinLocDN100134c0g1t2.p1	PREDICTED: uncharacterized protein LOC107344729 [Acropora digitifera]	1.1e-15	NA	NA	NA	NA	NA
GENE.evgHyS_ScswcV5_3964.g17698.t1~~evgHyS_ScswcV5_3964.g17698.t1.p1	4.37726	1.11014	8.04783e-05	0.00191618	evgHyS_ScswcV5_3964.g17698.t1.p1	PREDICTED: LIM/homeobox protein Lhx1 isoform X1 [Nanorana parkeri]	1.22e-86	LIM homeobox 1	LHX1	sequence-specific DNA binding	positive regulation of anterior head development	nucleus
GENE.evgMSTRG.47626.3~~evgMSTRG.47626.3.p1	3.36679	0.85387	8.04786e-05	0.00191618	evgMSTRG.47626.3.p1	hypothetical protein TTHERM_01295290 [Tetrahymena thermophila SB210]	4.1	NA	NA	NA	NA	NA
GENE.evgHyS_ScswcV5_3339.g13988.t1~~evgHyS_ScswcV5_3339.g13988.t1.p1	2.67703	0.679149	8.08914e-05	0.00192281	evgHyS_ScswcV5_3339.g13988.t1.p1	PREDICTED: dual 3',5'-cyclic-AMP and -GMP phosphodiesterase 11A-like [Hydra vulgaris]	0	Phosphodiesterase	NA	3',5'-cyclic-nucleotide phosphodiesterase activity	signal transduction	plasma membrane
GENE.evgMSTRG.79541.1~~evgMSTRG.79541.1.p1	7.14964	1.816	8.24986e-05	0.00195187	evgMSTRG.79541.1.p1	aminotransferase class I/II-fold pyridoxal phosphate-dependent enzyme [Nocardia fluminea]	1.2	NA	NA	NA	NA	NA
GENE.evgMSTRG.40140.1~~evgMSTRG.40140.1.p1	6.05566	1.54536	8.90643e-05	0.00207277	evgMSTRG.40140.1.p1	hypothetical protein AC249_AIPGENE9596 [Exaiptasia pallida]	8.99e-10	NA	NA	NA	NA	NA
GENE.evgtrinLocDN5099c9g1t2~~evgtrinLocDN5099c9g1t2.p1	6.62516	1.6919	9.01001e-05	0.00208953	NA	NA	NA	NA	NA	NA	NA	NA
GENE.evgMSTRG.135506.1~~evgMSTRG.135506.1.p1	5.78293	1.47767	9.09562e-05	0.00210682	evgMSTRG.135506.1.p1	uncharacterized protein PF11_0207-like [Orbicella faveolata]	0.000233	NA	NA	NA	NA	NA
GENE.evgtrinLocDN25190c0g1t1~~evgtrinLocDN25190c0g1t1.p1	4.22235	1.08069	9.3417e-05	0.00215595	evgtrinLocDN25190c0g1t1.p1	lens fiber membrane intrinsic protein [Chelonia mydas]	9.8e-06	NA	NA	NA	NA	NA
GENE.evgMSTRG.64096.1~~evgMSTRG.64096.1.p1	8.90882	2.28248	9.49592e-05	0.00218641	evgMSTRG.64096.1.p1	PREDICTED: alpha-1A adrenergic receptor-like [Acropora digitifera]	0.003	NA	NA	NA	NA	NA
GENE.evgHyS_ScswcV5_1907.g7666.t1~~evgHyS_ScswcV5_1907.g7666.t1.p1	7.25518	1.8591	9.51981e-05	0.00218646	evgHyS_ScswcV5_1907.g7666.t1.p1	PREDICTED: probable glutamate receptor [Hydra vulgaris]	2.71e-49	NA	NA	NA	NA	NA
GENE.evgHyS_ScswcV5_3470.g14530.t1~~evgHyS_ScswcV5_3470.g14530.t1.p1	2.75444	0.706155	9.59494e-05	0.00219841	evgHyS_ScswcV5_3470.g14530.t1.p1	PREDICTED: mechanosensory protein 2-like [Hydra vulgaris]	1.27e-112	Mechanosensory protein 2	MEC-2	RNA polymerase binding	regulation of acid-sensing ion channel activity	membrane
GENE.evgtrinLocDN35432c0g1t4~~evgtrinLocDN35432c0g1t4.p1	7.23196	1.85879	9.99602e-05	0.00228206	evgtrinLocDN35432c0g1t4.p1	PREDICTED: pentatricopeptide repeat-containing protein At4g16835, mitochondrial-like isoform X4 [Vitis vinifera]	8.9	NA	NA	NA	NA	NA
GENE.evgHyS_ScswcV5_3062.g12082.t1~~evgHyS_ScswcV5_3062.g12082.t1.p1	6.21305	1.60044	0.000103564	0.00234992	evgHyS_ScswcV5_3062.g12082.t1.p1	hypothetical protein pdam_00020392 [Pocillopora damicornis]	1.07e-21	NA	NA	NA	NA	NA
GENE.evgMSTRG.68958.1~~evgMSTRG.68958.1.p1	4.4609	1.15011	0.00010502	0.00237762	evgMSTRG.68958.1.p1	cytochrome b5 reductase 4 [Vombatus ursinus]	1.03e-136	LOW QUALITY PROTEIN: cytochrome b5 reductase 4	CYB5R4	heme binding	insulin secretion	perinuclear region of cytoplasm
GENE.evgMSTRG.38548.1~~evgMSTRG.38548.1.p2	7.35275	1.89693	0.000106133	0.00239996	evgMSTRG.38548.1.p2	predicted protein [Micromonas commoda]	2.27e-15	NA	NA	NA	NA	NA
GENE.evgtrinLocDN100125c0g1t5~~evgtrinLocDN100125c0g1t5.p1	7.80754	2.02356	0.000114171	0.00256045	NA	NA	NA	NA	NA	NA	NA	NA
GENE.evgtrinLocDN1546c0g1t6~~evgtrinLocDN1546c0g1t6.p1	3.91762	1.01856	0.000119947	0.00266487	evgtrinLocDN1546c0g1t6.p1	putative protein K02A2.6-like protein [Labeo rohita]	3.37e-18	NA	NA	NA	NA	NA
GENE.evgHyS_ScswcV5_644.g2302.t1~~evgHyS_ScswcV5_644.g2302.t1.p1	4.76587	1.24117	0.000123128	0.00272283	evgHyS_ScswcV5_644.g2302.t1.p1	Erg1 [Nematostella vectensis]	0	Potassium voltage-gated channel subfamily H member 7	KCNH7	voltage-gated potassium channel activity	regulation of ion transmembrane transport	integral component of membrane
GENE.evgHyS_ScswcV5_1733.g5773.t1~~evgHyS_ScswcV5_1733.g5773.t1.p1	3.08518	0.804865	0.000126506	0.00278138	evgHyS_ScswcV5_1733.g5773.t1.p1	CRUMBS [Oscarella lobularis]	0	Notch 1	NA	calcium ion binding	Notch signaling pathway	integral component of membrane
GENE.evgHyS_ScswcV5_4509.g21558.t1~~evgHyS_ScswcV5_4509.g21558.t1.p1	5.43148	1.42014	0.000130987	0.00286008	evgHyS_ScswcV5_4509.g21558.t1.p1	PREDICTED: octopamine receptor 1-like [Acropora digitifera]	2.14e-39	Rhodopsin (Fragment)	NA	G protein-coupled receptor activity	G protein-coupled receptor signaling pathway	integral component of membrane
GENE.evgHyS_ScswcV5_1004.g4109.t1~~evgHyS_ScswcV5_1004.g4109.t1.p1	4.40151	1.15118	0.000131575	0.00286963	evgHyS_ScswcV5_1004.g4109.t1.p1	PREDICTED: protein ZGRF1 [Hydra vulgaris]	0	p-loop containing nucleoside triphosphate hydrolase protein	NA	hydrolase activity	NA	NA
GENE.evgtrinLocDN28761c1g1t11~~evgtrinLocDN28761c1g1t11.p1	8.09266	2.12337	0.000138277	0.00300205	evgtrinLocDN28761c1g1t11.p1	hypothetical protein BSL78_14743 [Apostichopus japonicus]	0.025	NA	NA	NA	NA	NA
GENE.evgtrinLocDN117091c0g1t11~~evgtrinLocDN117091c0g1t11.p1	6.12806	1.61068	0.000142004	0.00305854	evgtrinLocDN117091c0g1t11.p1	hypothetical protein T265_09272 [Opisthorchis viverrini]	0.15	NA	NA	NA	NA	NA
GENE.evgHyS_ScswcV5_4509.g21409.t1~~evgHyS_ScswcV5_4509.g21409.t1.p1	3.9252	1.03433	0.000147694	0.00315965	evgHyS_ScswcV5_4509.g21409.t1.p1	uncharacterized protein LOC111122972 [Crassostrea virginica]	1.14e-12	NA	NA	NA	NA	NA
GENE.evgtrinLocDN29007c1g1t2~~evgtrinLocDN29007c1g1t2.p1	9.03604	2.38383	0.000150315	0.00319777	NA	NA	NA	NA	NA	NA	NA	NA
GENE.evgtrinLocDN17474c0g1t12~~evgtrinLocDN17474c0g1t12.p1	8.05349	2.12781	0.000153787	0.00326069	evgtrinLocDN17474c0g1t12.p1	hypothetical protein AC249_AIPGENE25309 [Exaiptasia pallida]	7.97e-09	NA	NA	NA	NA	NA
GENE.evgtrinLocDN39944c0g1t3~~evgtrinLocDN39944c0g1t3.p1	4.52797	1.19707	0.00015524	0.00328381	evgtrinLocDN39944c0g1t3.p1	PREDICTED: uncharacterized protein LOC105846509 [Hydra vulgaris]	1.67e-139	Short-chain collagen C4	NA	catalytic activity, acting on a protein	DNA integration	collagen trimer
GENE.evgHyS_ScswcV5_644.g2395.t1~~evgHyS_ScswcV5_644.g2395.t1.p1	3.52031	0.93096	0.000155963	0.00329216	evgHyS_ScswcV5_644.g2395.t1.p1	PREDICTED: kelch-like protein 18 [Hydra vulgaris]	0	Actin-binding protein IPP	KLHL18	protein homodimerization activity	protein autoubiquitination	polytene chromosome puff
GENE.evgMSTRG.103687.1~~evgMSTRG.103687.1.p1	8.65522	2.29054	0.000157665	0.0033169	NA	NA	NA	NA	NA	NA	NA	NA
GENE.evgtrinLocDN64609c0g1t15~~evgtrinLocDN64609c0g1t15.p1	4.86435	1.28741	0.000157831	0.0033169	evgtrinLocDN64609c0g1t15.p1	dolichol kinase-like, partial [Exaiptasia pallida]	5.51e-52	Dolichol kinase	DOLK	dolichol kinase activity	dolichyl monophosphate biosynthetic process	integral component of endoplasmic reticulum membrane
GENE.evgHyS_ScswcV5_3978.g17905.t1~~evgHyS_ScswcV5_3978.g17905.t1.p1	2.48199	0.657817	0.000161252	0.00338132	evgHyS_ScswcV5_3978.g17905.t1.p1	PREDICTED: tudor domain-containing protein 1-like, partial [Hydra vulgaris]	2.39e-40	NA	NA	NA	NA	NA
GENE.evgHyS_ScswcV5_2333.g8665.t1~~evgHyS_ScswcV5_2333.g8665.t1.p1	2.71075	0.718982	0.000163079	0.00340462	evgHyS_ScswcV5_2333.g8665.t1.p1	PREDICTED: tetratricopeptide repeat protein 39C-like [Hydra vulgaris]	0	Tetratricopeptide repeat protein 39C	TTC39C	NA	otolith morphogenesis	integral component of membrane
GENE.evgMSTRG.131027.2~~evgMSTRG.131027.2.p1	2.70852	0.718678	0.000164067	0.00341777	evgMSTRG.131027.2.p1	protein kinase C, partial [Hydra vulgaris]	0	Protein kinase C alpha type	PRKCA	protein kinase C activity	protein phosphorylation	cytosol
GENE.evgMSTRG.18866.1~~evgMSTRG.18866.1.p1	7.35124	1.95774	0.000173369	0.00356858	evgMSTRG.18866.1.p1	hypothetical protein AC249_AIPGENE3338, partial [Exaiptasia pallida]	1.17e-17	NA	NA	NA	NA	NA
GENE.evgtrinLocDN12680c1g1t4~~evgtrinLocDN12680c1g1t4.p1	4.29417	1.14387	0.000173978	0.00357016	evgtrinLocDN12680c1g1t4.p1	predicted protein [Nematostella vectensis]	4.59e-14	Ligand-gated ion channel family protein	NA	voltage-gated potassium channel activity	ionotropic glutamate receptor signaling pathway	voltage-gated potassium channel complex
GENE.evgHyS_ScswcV5_2556.g10594.t1~~evgHyS_ScswcV5_2556.g10594.t1.p1	7.51992	2.0048	0.000176161	0.00360656	evgHyS_ScswcV5_2556.g10594.t1.p1	neuronal acetylcholine receptor subunit alpha-2-like isoform X3 [Stylophora pistillata]	0	Nicotinic acetylcholine receptor subunit type G	NA	acetylcholine-gated cation-selective channel activity	excitatory postsynaptic potential	postsynaptic membrane
GENE.evgMSTRG.37142.1~~evgMSTRG.37142.1.p4	8.21817	2.1938	0.000179618	0.00366552	NA	NA	NA	NA	NA	NA	NA	NA
GENE.evgHyS_ScswcV5_4418.g21124.t1~~evgHyS_ScswcV5_4418.g21124.t1.p1	2.72671	0.728191	0.000180753	0.00368473	evgHyS_ScswcV5_4418.g21124.t1.p1	PREDICTED: uncharacterized protein LOC101238783 [Hydra vulgaris]	0	NA	NA	NA	NA	NA
GENE.evgHyS_ScswcV5_3493.g15146.t1~~evgHyS_ScswcV5_3493.g15146.t1.p1	2.33003	0.622469	0.000181683	0.00369183	evgHyS_ScswcV5_3493.g15146.t1.p1	PREDICTED: ankyrin-3-like [Hydra vulgaris]	0	Ankyrin 2, neuronal	NA	ion channel binding	signal transduction	plasma membrane region
GENE.evgHyS_ScswcV5_3574.g15339.t1~~evgHyS_ScswcV5_3574.g15339.t1.p1	2.4386	0.652247	0.000184925	0.00374174	evgHyS_ScswcV5_3574.g15339.t1.p1	PREDICTED: epithelial splicing regulatory protein 1-like [Hydra vulgaris]	0	Epithelial splicing regulatory protein 2	ESRP2	nucleic acid binding	regulation of RNA splicing	nucleoplasm
GENE.evgHyS_ScswcV5_66.g684.t1~~evgHyS_ScswcV5_66.g684.t1.p1	2.7449	0.734756	0.000187117	0.00377806	evgHyS_ScswcV5_66.g684.t1.p1	PREDICTED: N-acetyl-beta-glucosaminyl-glycoprotein 4-beta-N-acetylgalactosaminyltransferase 1-like [Hydra vulgaris]	4.07e-136	Beta-1,4-N-acetylgalactosaminyltransferase	NA	N-acetyl-beta-glucosaminyl-glycoprotein 4-beta-N-acetylgalactosaminyltransferase activity	NA	Golgi cisterna membrane
GENE.evgHyS_ScswcV5_410.g1553.t1~~evgHyS_ScswcV5_410.g1553.t1.p1	6.50682	1.74198	0.000187495	0.00378169	evgHyS_ScswcV5_410.g1553.t1.p1	Cnox-2 [Hydractinia symbiolongicarpus]	9.05e-168	Homeodomain transcription factor protein GSX	NA	sequence-specific DNA binding	regulation of transcription, DNA-templated	nucleus
GENE.evgMSTRG.66818.1~~evgMSTRG.66818.1.p1	3.16456	0.847637	0.000188919	0.00379833	evgMSTRG.66818.1.p1	PREDICTED: 1-acylglycerol-3-phosphate O-acyltransferase ABHD5-like [Hydra vulgaris]	8.55e-177	Abhydrolase domain-containing protein 4	ABHD4	hydrolase activity	lipid homeostasis	lipid droplet
GENE.evgtrinLocDN6804c0g1t13~~evgtrinLocDN6804c0g1t13.p1	4.59745	1.23199	0.000190175	0.00381956	evgtrinLocDN6804c0g1t13.p1	PREDICTED: LOW QUALITY PROTEIN: homeobox protein SMOX-4-like [Hydra vulgaris]	6.91e-24	NA	NA	NA	NA	NA
GENE.evgHyS_ScswcV5_704.g3231.t1~~evgHyS_ScswcV5_704.g3231.t1.p1	4.86242	1.3034	0.000191043	0.0038289	NA	NA	NA	NA	NA	NA	NA	NA
GENE.evgHyS_ScswcV5_4681.g21761.t1~~evgHyS_ScswcV5_4681.g21761.t1.p1	4.84044	1.29761	0.000191271	0.00382944	evgHyS_ScswcV5_4681.g21761.t1.p1	PREDICTED: probable glutamate receptor [Hydra vulgaris]	4.16e-56	NA	NA	NA	NA	NA
GENE.evgMSTRG.117133.1~~evgMSTRG.117133.1.p1	3.25401	0.872648	0.000192323	0.00384243	evgMSTRG.117133.1.p1	hypothetical protein CAPTEDRAFT_197639 [Capitella teleta]	5.35e-71	NA	NA	NA	NA	NA
GENE.evgHyS_ScswcV5_3896.g17165.t1~~evgHyS_ScswcV5_3896.g17165.t1.p1	3.46717	0.931383	0.000197179	0.00392479	evgHyS_ScswcV5_3896.g17165.t1.p1	PREDICTED: protein kinase C and casein kinase substrate in neurons protein 1-like [Hydra vulgaris]	2.8e-90	Kinase C and casein kinase substrate in neurons protein (Fragment)	PACSIN3	kinase activity	plasma membrane tubulation	cytoskeleton
GENE.evgMSTRG.107034.1~~evgMSTRG.107034.1.p1	4.51344	1.21248	0.00019727	0.00392479	evgMSTRG.107034.1.p1	trace amine-associated receptor 13c-like [Seriola dumerili]	0.055	NA	NA	NA	NA	NA
GENE.evgHyS_ScswcV5_1783.g7260.t1~~evgHyS_ScswcV5_1783.g7260.t1.p1	3.82502	1.02842	0.000199775	0.00396221	evgHyS_ScswcV5_1783.g7260.t1.p1	hypothetical protein EPR50_G00126520 [Perca flavescens]	1.61e-39	Aquaporin	NA	channel activity	transmembrane transport	integral component of membrane
GENE.evgHyS_ScswcV5_3470.g14475.t1~~evgHyS_ScswcV5_3470.g14475.t1.p1	4.68312	1.26054	0.000203067	0.00401077	evgHyS_ScswcV5_3470.g14475.t1.p1	RagB/SusD family nutrient uptake outer membrane protein [Parabacteroides sp. SN4]	9.9	NA	NA	NA	NA	NA
GENE.evgtrinLocDN13882c1g1t3~~evgtrinLocDN13882c1g1t3.p1	3.78809	1.02008	0.000204393	0.00403279	evgtrinLocDN13882c1g1t3.p1	PREDICTED: galactose-3-O-sulfotransferase 4-like [Hydra vulgaris]	2.26e-79	Galactosylceramide sulfotransferase	NA	galactose 3-O-sulfotransferase activity	glycolipid biosynthetic process	Golgi apparatus
GENE.evgtrinLocDN4556c0g2t1~~evgtrinLocDN4556c0g2t1.p1	4.17399	1.12457	0.000205937	0.00405067	evgtrinLocDN4556c0g2t1.p1	PREDICTED: uncharacterized protein LOC102804302, partial [Saccoglossus kowalevskii]	1.34e-45	NA	NA	NA	NA	NA
GENE.evgHyS_ScswcV5_2988.g11787.t1~~evgHyS_ScswcV5_2988.g11787.t1.p1	3.04988	0.823831	0.000213851	0.00418041	evgHyS_ScswcV5_2988.g11787.t1.p1	PREDICTED: neurobeachin-like protein 1 [Hydra vulgaris]	0	Neurobeachin like 1	NBEAL1	oxidoreductase activity, acting on paired donors, with incorporation or reduction of molecular oxygen	platelet formation	endoplasmic reticulum
GENE.evgHyS_ScswcV5_3574.g15637.t1~~evgHyS_ScswcV5_3574.g15637.t1.p1	5.05814	1.37251	0.00022842	0.00442883	evgHyS_ScswcV5_3574.g15637.t1.p1	PREDICTED: leucine-rich repeat-containing protein 74A-like [Hydra vulgaris]	4.22e-126	leucine-rich repeat-containing protein 74B	NA	calcium ion binding	NA	NA
GENE.evgHyS_ScswcV5_644.g2519.t1~~evgHyS_ScswcV5_644.g2519.t1.p1	2.43338	0.660578	0.000229858	0.00444765	evgHyS_ScswcV5_644.g2519.t1.p1	PREDICTED: V-type proton ATPase 116 kDa subunit a isoform 1-like isoform X1 [Hydra vulgaris]	0	V-type proton ATPase subunit a	NA	proton transmembrane transporter activity	ATP hydrolysis coupled proton transport	vacuolar proton-transporting V-type ATPase, V0 domain
GENE.evgHyS_ScswcV5_3470.g14898.t1~~evgHyS_ScswcV5_3470.g14898.t1.p1	2.79212	0.758412	0.000231828	0.00448122	evgHyS_ScswcV5_3470.g14898.t1.p1	kinesin-like protein KIF6 [Pocillopora damicornis]	0	Kinesin family member 6	NA	motor activity	microtubule-based movement	ciliary base
GENE.evgMSTRG.47614.1~~evgMSTRG.47614.1.p1	2.95458	0.803544	0.000236058	0.00454913	evgMSTRG.47614.1.p1	uncharacterized protein LOC106151955 [Lingula anatina]	3.8	NA	NA	NA	NA	NA
GENE.evgHyS_ScswcV5_4433.g21176.t1~~evgHyS_ScswcV5_4433.g21176.t1.p1	2.77328	0.755323	0.000240995	0.00462089	evgHyS_ScswcV5_4433.g21176.t1.p1	PREDICTED: TWiK family of potassium channels protein 7-like isoform X1 [Hydra vulgaris]	1.08e-87	NA	NA	NA	NA	NA
GENE.evgtrinLocDN12396c0g1t6~~evgtrinLocDN12396c0g1t6.p1	5.06924	1.38076	0.000241283	0.00462177	evgtrinLocDN12396c0g1t6.p1	adrenocorticotropic hormone receptor-like [Orbicella faveolata]	2.26e-08	NA	NA	NA	NA	NA
GENE.evgMSTRG.139215.1~~evgMSTRG.139215.1.p1	5.9366	1.61906	0.000245705	0.00469486	evgMSTRG.139215.1.p1	melanocortin receptor 4-like [Orbicella faveolata]	0.001	NA	NA	NA	NA	NA
GENE.evgHyS_ScswcV5_3062.g12084.t1~~evgHyS_ScswcV5_3062.g12084.t1.p1	2.83308	0.773035	0.000247453	0.00471622	evgHyS_ScswcV5_3062.g12084.t1.p1	patched domain-containing protein 3-like isoform X2 [Pocillopora damicornis]	3.15e-176	Patched domain-containing protein 3	PTCHD3	transmembrane transporter activity	nematode male tail tip morphogenesis	integral component of membrane
GENE.evgtrinLocDN30387c0g1t16~~evgtrinLocDN30387c0g1t16.p1	7.93282	2.16673	0.000251049	0.0047752	evgtrinLocDN30387c0g1t16.p1	PREDICTED: actin-100-like isoform X2 [Nicotiana attenuata]	1.14e-32	Actin, muscle	NA	ATP binding	dynein-driven meiotic oscillatory nuclear movement	dynactin complex
GENE.evgMSTRG.100317.1~~evgMSTRG.100317.1.p2	4.92207	1.34507	0.000252862	0.00480488	evgMSTRG.100317.1.p2	hypothetical protein [Thermoanaerobacter wiegelii]	1.7	NA	NA	NA	NA	NA
GENE.evgMSTRG.82846.3~~evgMSTRG.82846.3.p1	4.14013	1.13226	0.000255674	0.00484381	evgMSTRG.82846.3.p1	piggyBac transposable element-derived protein 4-like [Stylophora pistillata]	9.16e-108	Putative tick transposon	NA	NA	NA	NA
GENE.evgHyS_ScswcV5_1750.g6648.t1~~evgHyS_ScswcV5_1750.g6648.t1.p1	3.18379	0.87127	0.000257986	0.00488277	evgHyS_ScswcV5_1750.g6648.t1.p1	hypothetical protein NEMVEDRAFT_v1g4310 [Nematostella vectensis]	3.9	NA	NA	NA	NA	NA
GENE.evgtrinLocDN25133c0g1t3~~evgtrinLocDN25133c0g1t3.p1	2.74542	0.751517	0.000259019	0.00488676	evgtrinLocDN25133c0g1t3.p1	PREDICTED: uncharacterized protein LOC101235491 [Hydra vulgaris]	3.19e-79	NA	NA	NA	NA	NA
GENE.evgtrinLocDN39673c0g1t4~~evgtrinLocDN39673c0g1t4.p1	7.77397	2.13159	0.000265285	0.00497638	NA	NA	NA	NA	NA	NA	NA	NA
GENE.evgtrinLocDN47644c1g2t6~~evgtrinLocDN47644c1g2t6.p1	7.28365	1.99811	0.000267106	0.00500068	evgtrinLocDN47644c1g2t6.p1	beta-N-acetylhexosaminidase [Sphingobacteriales bacterium]	6.3	NA	NA	NA	NA	NA
GENE.evgtrinLocDN106444c0g1t12~~evgtrinLocDN106444c0g1t12.p1	6.07438	1.66703	0.000268618	0.00501912	evgtrinLocDN106444c0g1t12.p1	PREDICTED: olfactory receptor 5D18-like [Hydra vulgaris]	0.47	NA	NA	NA	NA	NA
GENE.evgHyS_ScswcV5_3781.g16322.t1~~evgHyS_ScswcV5_3781.g16322.t1.p1	2.7593	0.757739	0.000271065	0.00504504	evgHyS_ScswcV5_3781.g16322.t1.p1	PREDICTED: inositol hexakisphosphate and diphosphoinositol-pentakisphosphate kinase 2-like [Hydra vulgaris]	0	Inositol hexakisphosphate and diphosphoinositol-pentakisphosphate kinase	NA	inositol heptakisphosphate kinase activity	phosphorylation	cytosol
GENE.evgtrinLocDN10568c0g2t2~~evgtrinLocDN10568c0g2t2.p1	4.18039	1.14822	0.000271844	0.0050546	evgtrinLocDN10568c0g2t2.p1	LOW QUALITY PROTEIN: protein eyes shut homolog [Carlito syrichta]	9.4	NA	NA	NA	NA	NA
GENE.evgMSTRG.292.1~~evgMSTRG.292.1.p1	3.91142	1.07525	0.000275096	0.00508815	evgMSTRG.292.1.p1	hypothetical protein pdam_00024306 [Pocillopora damicornis]	3.13e-42	Ixoderin precursor, putative (Fragment)	NA	transposase activity	transposition, DNA-mediated	integral component of membrane
GENE.evgtrinLocDN55025c0g1t13~~evgtrinLocDN55025c0g1t13.p1	4.01718	1.10566	0.00027985	0.00515313	evgtrinLocDN55025c0g1t13.p1	PREDICTED: uncharacterized protein LOC105846361 [Hydra vulgaris]	4.56e-13	NA	NA	NA	NA	NA
GENE.evgMSTRG.46347.1~~evgMSTRG.46347.1.p1	6.09784	1.68034	0.000284602	0.00521839	evgMSTRG.46347.1.p1	PREDICTED: uncharacterized protein LOC105843510 [Hydra vulgaris]	2	NA	NA	NA	NA	NA
GENE.evgMSTRG.45914.1~~evgMSTRG.45914.1.p1	2.91748	0.804452	0.000287108	0.00524816	evgMSTRG.45914.1.p1	PREDICTED: Hermansky-Pudlak syndrome 3 protein homolog [Hydra vulgaris]	0	NA	NA	NA	NA	NA
GENE.evgHyS_ScswcV5_3186.g12564.t1~~evgHyS_ScswcV5_3186.g12564.t1.p1	3.42648	0.944826	0.000287215	0.00524816	evgHyS_ScswcV5_3186.g12564.t1.p1	PREDICTED: synaptotagmin-16-like [Hydra vulgaris]	0	NA	NA	NA	NA	NA
GENE.evgHyS_ScswcV5_4037.g18092.t1~~evgHyS_ScswcV5_4037.g18092.t1.p1	7.35608	2.03015	0.000290733	0.00530734	NA	NA	NA	NA	NA	NA	NA	NA
GENE.evgtrinLocDN32013c0g2t5~~evgtrinLocDN32013c0g2t5.p1	4.01602	1.10863	0.000291754	0.00532087	evgtrinLocDN32013c0g2t5.p1	mAch receptor 1 [Hydra vulgaris]	7.82e-103	MAch receptor 1	NA	G protein-coupled receptor activity	G protein-coupled receptor signaling pathway	integral component of plasma membrane
GENE.evgtrinLocDN2402c0g1t2~~evgtrinLocDN2402c0g1t2.p1	2.90561	0.803665	0.000299835	0.00542151	evgtrinLocDN2402c0g1t2.p1	PREDICTED: tetraspanin-6-like [Hydra vulgaris]	9.28e-61	Tetraspanin	NA	NA	cell surface receptor signaling pathway	integral component of membrane
GENE.evgtrinLocDN6690c0g1t11~~evgtrinLocDN6690c0g1t11.p1	6.90135	1.90998	0.000302315	0.00546118	evgtrinLocDN6690c0g1t11.p1	predicted protein [Nematostella vectensis]	9.35e-40	NA	NA	NA	NA	NA
GENE.evgtrinLocDN6517c0g4t3~~evgtrinLocDN6517c0g4t3.p1	2.55666	0.707811	0.000303773	0.00548231	evgtrinLocDN6517c0g4t3.p1	two pore potassium channel protein sup-9-like isoform X1 [Stylophora pistillata]	3.84e-67	Two pore potassium channel protein sup-9	NA	potassium channel activity	potassium ion transmembrane transport	integral component of membrane
GENE.evgtrinLocDN51611c0g1t2~~evgtrinLocDN51611c0g1t2.p1	8.6466	2.39443	0.000304868	0.00549687	evgtrinLocDN51611c0g1t2.p1	hypothetical protein NEMVEDRAFT_v1g225385 [Nematostella vectensis]	3.64e-13	NA	NA	NA	NA	NA
GENE.evgHyS_ScswcV5_1000.g4085.t1~~evgHyS_ScswcV5_1000.g4085.t1.p1	6.0692	1.68084	0.000305249	0.00549852	NA	NA	NA	NA	NA	NA	NA	NA
GENE.evgtrinLocDN11964c1g2t1~~evgtrinLocDN11964c1g2t1.p1	8.87373	2.46006	0.00030962	0.00556148	evgtrinLocDN11964c1g2t1.p1	Uncharacterized protein 259R [Exaiptasia pallida]	4.64e-16	NA	NA	NA	NA	NA
GENE.evgHyS_ScswcV5_3574.g15555.t1~~evgHyS_ScswcV5_3574.g15555.t1.p1	2.67124	0.742689	0.000322258	0.00573438	evgHyS_ScswcV5_3574.g15555.t1.p1	PREDICTED: uncharacterized protein LOC100211951 [Hydra vulgaris]	1.07e-11	NA	NA	NA	NA	NA
GENE.evgHyS_ScswcV5_1325.g4732.t1~~evgHyS_ScswcV5_1325.g4732.t1.p1	7.07949	1.97101	0.000328385	0.00580543	evgHyS_ScswcV5_1325.g4732.t1.p1	uncharacterized protein LOC111329493 isoform X3 [Stylophora pistillata]	3.05e-95	NA	NA	NA	NA	NA
GENE.evgHyS_ScswcV5_4051.g18356.t1~~evgHyS_ScswcV5_4051.g18356.t1.p1	4.66977	1.30032	0.000329094	0.00581256	evgHyS_ScswcV5_4051.g18356.t1.p1	uncharacterized protein LOC110043988 [Orbicella faveolata]	0	NA	NA	NA	NA	NA
GENE.evgHyS_ScswcV5_2447.g9521.t1~~evgHyS_ScswcV5_2447.g9521.t1.p1	3.6736	1.02418	0.00033465	0.00589975	evgHyS_ScswcV5_2447.g9521.t1.p1	PREDICTED: uncharacterized protein LOC105845533 [Hydra vulgaris]	3.53e-112	NA	NA	NA	NA	NA
GENE.evgMSTRG.80202.4~~evgMSTRG.80202.4.p1	4.35871	1.21773	0.000344404	0.00604468	evgMSTRG.80202.4.p1	uncharacterized protein LOC110981980 [Acanthaster planci]	0.14	NA	NA	NA	NA	NA
GENE.evgHyS_ScswcV5_4079.g18884.t1~~evgHyS_ScswcV5_4079.g18884.t1.p1	7.16439	2.00214	0.000345739	0.00604776	evgHyS_ScswcV5_4079.g18884.t1.p1	ATP-dependent DNA helicase PIF1-like [Exaiptasia pallida]	5.93e-12	NA	NA	NA	NA	NA
GENE.evgMSTRG.81713.1~~evgMSTRG.81713.1.p1	3.58177	1.00226	0.000351969	0.00611449	evgMSTRG.81713.1.p1	PREDICTED: MATH and LRR domain-containing protein PFE0570w-like [Hydra vulgaris]	7.8e-21	NA	NA	NA	NA	NA
GENE.evgtrinLocDN197890c0g1t4~~evgtrinLocDN197890c0g1t4.p1	8.46006	2.36955	0.000356541	0.00618827	evgtrinLocDN197890c0g1t4.p1	hypothetical protein AWC38_SpisGene22865 [Stylophora pistillata]	3.87e-10	NA	NA	NA	NA	NA
GENE.evgMSTRG.72286.1~~evgMSTRG.72286.1.p1	7.35768	2.06225	0.000360008	0.00623293	evgMSTRG.72286.1.p1	hypothetical protein EHM39_02125 [Chloroflexi bacterium]	0.98	NA	NA	NA	NA	NA
GENE.evgMSTRG.40081.3~~evgMSTRG.40081.3.p1	6.59301	1.8484	0.000361274	0.00623733	evgMSTRG.40081.3.p1	hypothetical protein FIESC28_06008 [Fusarium sp. FIESC_28]	7.1	NA	NA	NA	NA	NA
GENE.evgtrinLocDN6044c0g3t1~~evgtrinLocDN6044c0g3t1.p1	7.6558	2.14639	0.000361333	0.00623733	evgtrinLocDN6044c0g3t1.p1	PREDICTED: alpha-1A adrenergic receptor-like [Hydra vulgaris]	0.17	NA	NA	NA	NA	NA
GENE.evgHyS_ScswcV5_2556.g10465.t1~~evgHyS_ScswcV5_2556.g10465.t1.p1	5.43381	1.5236	0.000361878	0.00624108	evgHyS_ScswcV5_2556.g10465.t1.p1	Alkylated DNA repair protein alkB-8-like protein [Morus notabilis]	1.16e-39	S-adenosyl-L-methionine-dependent methyltransferase	NA	tRNA (uracil) methyltransferase activity	tRNA wobble uridine modification	nucleus
GENE.evgtrinLocDN10423c0g1t3~~evgtrinLocDN10423c0g1t3.p1	7.54307	2.11557	0.000363163	0.00625758	evgtrinLocDN10423c0g1t3.p1	uncharacterized protein LOC110061612 [Orbicella faveolata]	8.73e-24	NA	NA	NA	NA	NA
GENE.evgHyS_ScswcV5_3808.g16526.t1~~evgHyS_ScswcV5_3808.g16526.t1.p1	4.44376	1.24675	0.000364848	0.00628093	evgHyS_ScswcV5_3808.g16526.t1.p1	PREDICTED: abhydrolase domain-containing protein 8-like [Hydra vulgaris]	1.36e-126	Abhydrolase domain-containing protein 8	ABHD8	hydrolase activity	NA	NA
GENE.evgHyS_ScswcV5_3470.g14615.t1~~evgHyS_ScswcV5_3470.g14615.t1.p1	2.56892	0.720945	0.000366269	0.00629969	evgHyS_ScswcV5_3470.g14615.t1.p1	PREDICTED: uncharacterized protein LOC100202994 [Hydra vulgaris]	0	NA	NA	NA	NA	NA
GENE.evgtrinLocDN439851c0g1t6~~evgtrinLocDN439851c0g1t6.p2	7.38501	2.07434	0.000370611	0.00635877	evgtrinLocDN439851c0g1t6.p2	uncharacterized protein LOC111060307 [Nilaparvata lugens]	3.94e-32	NA	NA	NA	NA	NA
GENE.evgMSTRG.115885.5~~evgMSTRG.115885.5.p1	2.20305	0.619512	0.000376399	0.00643325	evgMSTRG.115885.5.p1	hypothetical protein pdam_00014146 [Pocillopora damicornis]	1.21e-59	NA	NA	NA	NA	NA
GENE.evgtrinLocDN1032c2g1t2~~evgtrinLocDN1032c2g1t2.p1	4.19021	1.17931	0.000380704	0.00650099	NA	NA	NA	NA	NA	NA	NA	NA
GENE.evgMSTRG.13271.1~~evgMSTRG.13271.1.p1	5.37419	1.51613	0.000393095	0.00666476	evgMSTRG.13271.1.p1	octopamine receptor Oamb-like [Exaiptasia pallida]	0.000218	NA	NA	NA	NA	NA
GENE.evgMSTRG.124740.1~~evgMSTRG.124740.1.p1	4.51343	1.27443	0.00039781	0.00672674	evgMSTRG.124740.1.p1	uncharacterized protein LOC110252048 [Exaiptasia pallida]	6.6e-31	NA	NA	NA	NA	NA
GENE.evgMSTRG.111578.2~~evgMSTRG.111578.2.p1	3.44237	0.973036	0.000403537	0.0067934	evgMSTRG.111578.2.p1	PREDICTED: uncharacterized protein LOC101235187 isoform X2 [Hydra vulgaris]	4.18e-12	NA	NA	NA	NA	NA
GENE.evgHyS_ScswcV5_3268.g13082.t1~~evgHyS_ScswcV5_3268.g13082.t1.p1	2.53213	0.716023	0.000405651	0.00681093	evgHyS_ScswcV5_3268.g13082.t1.p1	PREDICTED: solute carrier family 12 member 8-like [Hydra vulgaris]	0	Solute carrier family 12 member	SLC12A8	potassium:chloride symporter activity	transmembrane transport	integral component of membrane
GENE.evgHyS_ScswcV5_2744.g11254.t1~~evgHyS_ScswcV5_2744.g11254.t1.p1	3.1678	0.8961	0.00040763	0.00683473	evgHyS_ScswcV5_2744.g11254.t1.p1	DEAD/DEAH box helicase [Pseudoalteromonas prydzensis]	0.66	NA	NA	NA	NA	NA
GENE.evgHyS_ScswcV5_1951.g7903.t1~~evgHyS_ScswcV5_1951.g7903.t1.p1	5.70441	1.61539	0.000413548	0.00690699	evgHyS_ScswcV5_1951.g7903.t1.p1	PREDICTED: heparan-sulfate 6-O-sulfotransferase 2-like [Hydra vulgaris]	3.9e-145	Heparan-sulfate 6-O-sulfotransferase	NA	sulfotransferase activity	heparan sulfate proteoglycan biosynthetic process, enzymatic modification	integral component of membrane
GENE.evgtrinLocDN232555c2g1t1~~evgtrinLocDN232555c2g1t1.p1	3.82515	1.09174	0.000458822	0.00753905	evgtrinLocDN232555c2g1t1.p1	uncharacterized protein LOC111042323, partial [Myzus persicae]	3.13e-21	DDE-domain-containing protein (Fragment)	NA	nucleic acid binding	regulation of transcription by RNA polymerase II	nucleus
GENE.evgMSTRG.41250.5~~evgMSTRG.41250.5.p1	2.6208	0.748019	0.000458916	0.00753905	evgMSTRG.41250.5.p1	PREDICTED: uncharacterized protein LOC100207087 isoform X1 [Hydra vulgaris]	1.11e-25	NA	NA	NA	NA	NA
GENE.evgMSTRG.121872.2~~evgMSTRG.121872.2.p1	4.70505	1.34319	0.000460217	0.00754644	evgMSTRG.121872.2.p1	PREDICTED: structure-specific endonuclease subunit slx1-like [Hydra vulgaris]	6.55e-103	Structure-specific endonuclease subunit SLX1	SLX1	5'-flap endonuclease activity	DNA recombination	Slx1-Slx4 complex
GENE.evgtrinLocDN313787c0g1t1~~evgtrinLocDN313787c0g1t1.p1	8.63595	2.46695	0.000464117	0.00758522	evgtrinLocDN313787c0g1t1.p1	uncharacterized protein LOC111628406, partial [Centruroides sculpturatus]	7.3e-20	NA	NA	NA	NA	NA
GENE.evgHyS_ScswcV5_3964.g17760.t1~~evgHyS_ScswcV5_3964.g17760.t1.p1	5.58432	1.59592	0.000466812	0.00762273	evgHyS_ScswcV5_3964.g17760.t1.p1	PREDICTED: clavesin-1-like [Hydra vulgaris]	4.9e-149	Retinaldehyde-binding protein 1-like protein 2	CLVS2	phosphatidylinositol-3,5-bisphosphate binding	lysosome organization	trans-Golgi network
GENE.evgtrinLocDN18150c0g1t14~~evgtrinLocDN18150c0g1t14.p1	7.7863	2.22537	0.000467221	0.00762288	evgtrinLocDN18150c0g1t14.p1	adhesion G protein-coupled receptor E1-like [Boleophthalmus pectinirostris]	2.46e-09	NA	NA	NA	NA	NA
GENE.evgMSTRG.90388.3~~evgMSTRG.90388.3.p1	3.2231	0.921389	0.000468602	0.00763232	evgMSTRG.90388.3.p1	PREDICTED: probable glutamate receptor [Hydra vulgaris]	1.64e-119	NA	NA	NA	NA	NA
GENE.evgHyS_ScswcV5_3978.g17835.t1~~evgHyS_ScswcV5_3978.g17835.t1.p1	3.62035	1.03577	0.000473472	0.00769659	evgHyS_ScswcV5_3978.g17835.t1.p1	PREDICTED: long-chain-fatty-acid--CoA ligase ACSBG2-like [Hydra vulgaris]	0	Long-chain-fatty-acid--CoA ligase 6	ACSBG2	ligase activity	long-chain fatty acid metabolic process	cytosol
GENE.evgtrinLocDN24596c0g1t1~~evgtrinLocDN24596c0g1t1.p1	7.73935	2.2143	0.000473761	0.00769659	evgtrinLocDN24596c0g1t1.p1	uncharacterized protein LOC105204222 [Solenopsis invicta]	2.38e-11	NA	NA	NA	NA	NA
GENE.evgMSTRG.74126.1~~evgMSTRG.74126.1.p1	6.36126	1.82038	0.000475014	0.00771038	evgMSTRG.74126.1.p1	hypothetical protein, partial [Candidatus Achromatium palustre]	0.5	NA	NA	NA	NA	NA
GENE.evgtrinLocDN3565c0g1t18~~evgtrinLocDN3565c0g1t18.p1	3.92042	1.12257	0.000478783	0.00775172	evgtrinLocDN3565c0g1t18.p1	PREDICTED: uncharacterized protein LOC105436622 [Strongylocentrotus purpuratus]	7.89e-42	Putative transposon ty3-i gag-pol polyprotein (Fragment)	NA	nucleic acid binding	DNA integration	nucleus
GENE.evgtrinLocDN674c0g1t11~~evgtrinLocDN674c0g1t11.p1	2.39579	0.686746	0.00048554	0.00784778	evgtrinLocDN674c0g1t11.p1	PREDICTED: zinc finger protein 121-like [Hydra vulgaris]	4.73e-121	NA	NA	NA	NA	NA
GENE.evgHyS_ScswcV5_3062.g12128.t1~~evgHyS_ScswcV5_3062.g12128.t1.p1	2.55625	0.734111	0.00049749	0.00800018	evgHyS_ScswcV5_3062.g12128.t1.p1	PREDICTED: putative serine/threonine-protein kinase A [Acropora digitifera]	9.49e-13	Tyrosine-protein kinase	NA	histone kinase activity (H2B-S14 specific)	histone H2B-S14 phosphorylation	incipient cellular bud site
GENE.evgHyS_ScswcV5_3882.g16770.t1~~evgHyS_ScswcV5_3882.g16770.t1.p1	2.67982	0.770458	0.000504762	0.00810343	evgHyS_ScswcV5_3882.g16770.t1.p1	PREDICTED: histone-lysine N-methyltransferase, H3 lysine-79 specific-like [Hydra vulgaris]	0	Histone-lysine N-methyltransferase, H3 lysine-79 specific	NA	histone methyltransferase activity (H3-K79 specific)	histone H3-K79 methylation	nucleus
GENE.evgHyS_ScswcV5_4075.g18582.t1~~evgHyS_ScswcV5_4075.g18582.t1.p1	2.10965	0.606693	0.000506503	0.00812454	evgHyS_ScswcV5_4075.g18582.t1.p1	PREDICTED: liprin-alpha-1-like [Hydra vulgaris]	0	PTPRF interacting protein alpha 3	PPFIA3	protein binding	neurotransmitter secretion	presynaptic active zone
GENE.evgMSTRG.80629.1~~evgMSTRG.80629.1.p1	4.41282	1.27249	0.000524607	0.0083726	evgMSTRG.80629.1.p1	melanocortin receptor 5-like [Stylophora pistillata]	2.73e-15	NA	NA	NA	NA	NA
GENE.evgtrinLocDN90552c0g1t3~~evgtrinLocDN90552c0g1t3.p1	6.62904	1.91414	0.000533791	0.00848362	evgtrinLocDN90552c0g1t3.p1	ABC transporter ATP-binding protein [Clostridium beijerinckii]	2.6	NA	NA	NA	NA	NA
GENE.evgtrinLocDN367c0g1t13~~evgtrinLocDN367c0g1t13.p1	4.09649	1.18306	0.00053496	0.00849511	evgtrinLocDN367c0g1t13.p1	diacylglycerol kinase eta-like [Acanthochromis polyacanthus]	1.02e-112	Diacylglycerol kinase eta	NA	diacylglycerol kinase activity	protein kinase C-activating G protein-coupled receptor signaling pathway	cytosol
GENE.evgHyS_ScswcV5_66.g673.t1~~evgHyS_ScswcV5_66.g673.t1.p1	2.70468	0.781746	0.000540599	0.00854901	evgHyS_ScswcV5_66.g673.t1.p1	Sox22 [Hydractinia echinata]	0	Transcription factor Sox-3	NA	DNA binding	male sex determination	nucleus
GENE.evgMSTRG.19071.1~~evgMSTRG.19071.1.p3	3.74762	1.08415	0.00054678	0.00862645	evgMSTRG.19071.1.p3	hypothetical protein AC249_AIPGENE26928 [Exaiptasia pallida]	0.028	NA	NA	NA	NA	NA
GENE.evgMSTRG.25106.8~~evgMSTRG.25106.8.p4	2.60252	0.752894	0.000546855	0.00862645	evgMSTRG.25106.8.p4	uncharacterized protein LOC110247987 [Exaiptasia pallida]	0.00057	NA	NA	NA	NA	NA
GENE.evgMSTRG.120018.1~~evgMSTRG.120018.1.p1	3.15538	0.914552	0.000560194	0.00879619	evgMSTRG.120018.1.p1	PREDICTED: uncharacterized protein K02A2.6-like [Branchiostoma belcheri]	7.01e-129	Retrovirus-related Pol polyprotein from transposon 412	NA	nucleic acid binding	DNA integration	integral component of membrane
GENE.evgtrinLocDN4074c11g1t1~~evgtrinLocDN4074c11g1t1.p1	4.7797	1.38567	0.0005619	0.00880541	evgtrinLocDN4074c11g1t1.p1	hypothetical protein CAPTEDRAFT_211147, partial [Capitella teleta]	1.04e-19	NA	NA	NA	NA	NA
GENE.evgHyS_ScswcV5_3906.g17278.t1~~evgHyS_ScswcV5_3906.g17278.t1.p1	6.42447	1.86589	0.000575052	0.00896722	evgHyS_ScswcV5_3906.g17278.t1.p1	sorting nexin-22 [Castor canadensis]	2.9	NA	NA	NA	NA	NA
GENE.evgMSTRG.114734.1~~evgMSTRG.114734.1.p2	5.9622	1.73607	0.000594049	0.00920316	NA	NA	NA	NA	NA	NA	NA	NA
GENE.evgtrinLocDN92091c0g2t1~~evgtrinLocDN92091c0g2t1.p1	5.16082	1.50356	0.000598259	0.00924582	evgtrinLocDN92091c0g2t1.p1	FAD-binding oxidoreductase [Halomonas sp. BC04]	1.8	NA	NA	NA	NA	NA
GENE.evgMSTRG.50842.1~~evgMSTRG.50842.1.p1	5.2713	1.53675	0.000603214	0.00929023	evgMSTRG.50842.1.p1	hypothetical protein RhiirA1_502882 [Rhizophagus irregularis]	1.47e-31	Gastrula zinc finger protein xlcgf46.1: PROVISIONAL	NA	DNA-directed DNA polymerase activity	DNA biosynthetic process	NA
GENE.evgtrinLocDN59296c0g2t4~~evgtrinLocDN59296c0g2t4.p1	3.80776	1.11093	0.000609082	0.00935991	evgtrinLocDN59296c0g2t4.p1	PREDICTED: ubiquitin-protein ligase E3B-like isoform X2 [Hydra vulgaris]	8.18e-44	NA	NA	NA	NA	NA
GENE.evgMSTRG.98566.1~~evgMSTRG.98566.1.p1	4.06798	1.1875	0.000613297	0.00940949	evgMSTRG.98566.1.p1	endonuclease-reverse transcriptase [Apostichopus japonicus]	3.93e-06	NA	NA	NA	NA	NA
GENE.evgtrinLocDN498541c0g1t4~~evgtrinLocDN498541c0g1t4.p1	2.54758	0.744042	0.000617126	0.00944541	evgtrinLocDN498541c0g1t4.p1	PREDICTED: bile salt export pump-like [Hydra vulgaris]	3.08e-34	NA	NA	NA	NA	NA
GENE.evgHyS_ScswcV5_1748.g6538.t1~~evgHyS_ScswcV5_1748.g6538.t1.p1	5.57931	1.62987	0.00061895	0.00946542	evgHyS_ScswcV5_1748.g6538.t1.p1	PREDICTED: gamma-aminobutyric acid receptor subunit beta-2-like [Acropora digitifera]	1.52e-40	Gamma-aminobutyric acid receptor subunit beta-2	NA	extracellular ligand-gated ion channel activity	regulation of membrane potential	postsynaptic membrane
GENE.evgMSTRG.57293.1~~evgMSTRG.57293.1.p1	6.28627	1.83797	0.000625683	0.0095284	evgMSTRG.57293.1.p1	30S ribosomal protein S8 [Chromatiales bacterium 21-64-14]	3.7	NA	NA	NA	NA	NA
GENE.evgMSTRG.17186.2~~evgMSTRG.17186.2.p1	2.32943	0.682249	0.000639379	0.00968479	evgMSTRG.17186.2.p1	PREDICTED: regulating synaptic membrane exocytosis protein 1-like isoform X1 [Hydra vulgaris]	1.19e-154	Regulating synaptic membrane exocytosis protein 2	RIMS1	Rab GTPase binding	exocytosis	presynaptic active zone
GENE.evgtrinLocDN58879c0g1t10~~evgtrinLocDN58879c0g1t10.p1	4.76139	1.39513	0.000642839	0.00972945	evgtrinLocDN58879c0g1t10.p1	PREDICTED: glutaredoxin domain-containing cysteine-rich protein CG31559-like [Hydra vulgaris]	7.17e-48	NA	NA	NA	NA	NA
GENE.evgHyS_ScswcV5_366.g1358.t1~~evgHyS_ScswcV5_366.g1358.t1.p1	4.41987	1.29529	0.00064425	0.00974307	evgHyS_ScswcV5_366.g1358.t1.p1	PREDICTED: mitochondrial substrate carrier family protein ucpB-like [Hydra vulgaris]	4.26e-144	mitochondrial uncoupling protein 5	NA	transmembrane transporter activity	mitochondrial transport	mitochondrial membrane
GENE.evgHyS_ScswcV5_2548.g10067.t1~~evgHyS_ScswcV5_2548.g10067.t1.p1	2.13805	0.626701	0.000645853	0.00975955	evgHyS_ScswcV5_2548.g10067.t1.p1	PREDICTED: membrane-associated phosphatidylinositol transfer protein 2-like [Hydra vulgaris]	0	Membrane associated phosphatidylinositol	NA	phospholipid transporter activity	phospholipid transport	subrhabdomeral cisterna
GENE.evgtrinLocDN104106c0g1t5~~evgtrinLocDN104106c0g1t5.p1	7.82406	2.29445	0.000649654	0.00979367	evgtrinLocDN104106c0g1t5.p1	predicted protein [Nematostella vectensis]	2.92e-27	NA	NA	NA	NA	NA
GENE.evgtrinLocDN17276c0g1t15~~evgtrinLocDN17276c0g1t15.p1	5.77162	1.69299	0.000651724	0.00981711	evgtrinLocDN17276c0g1t15.p1	calmodulin [Colletotrichum fioriniae PJ7]	9.32e-05	NA	NA	NA	NA	NA
GENE.evgHyS_ScswcV5_4418.g21100.t1~~evgHyS_ScswcV5_4418.g21100.t1.p1	2.37479	0.697641	0.00066401	0.00994708	evgHyS_ScswcV5_4418.g21100.t1.p1	PREDICTED: ER degradation-enhancing alpha-mannosidase-like protein 3, partial [Hydra vulgaris]	0	ER degradation-enhancing alpha-mannosidase-like protein 3	NA	mannosyl-oligosaccharide 1,2-alpha-mannosidase activity	mannose trimming involved in glycoprotein ERAD pathway	membrane
GENE.evgHyS_ScswcV5_4051.g18208.t1~~evgHyS_ScswcV5_4051.g18208.t1.p1	2.56148	0.753089	0.000670656	0.0100151	evgHyS_ScswcV5_4051.g18208.t1.p1	PREDICTED: WD repeat-containing protein 26-like [Hydra vulgaris]	0	WD repeat-containing protein 26	NA	serine-type exopeptidase activity	Wnt signaling pathway	ubiquitin ligase complex
GENE.evgtrinLocDN2742c0g8t1~~evgtrinLocDN2742c0g8t1.p1	4.91387	1.44499	0.000672301	0.0100242	NA	NA	NA	NA	NA	NA	NA	NA
GENE.evgHyS_ScswcV5_3339.g14134.t1~~evgHyS_ScswcV5_3339.g14134.t1.p1	3.93824	1.15809	0.000672318	0.0100242	evgHyS_ScswcV5_3339.g14134.t1.p1	PREDICTED: uncharacterized protein LOC100210078 [Hydra vulgaris]	0.031	NA	NA	NA	NA	NA
GENE.evgMSTRG.20160.7~~evgMSTRG.20160.7.p1	4.71023	1.38763	0.000687659	0.010211	evgMSTRG.20160.7.p1	PREDICTED: uncharacterized protein LOC105845533 [Hydra vulgaris]	2.21e-48	VIC family potassium channel protein	NA	voltage-gated potassium channel activity	potassium ion transmembrane transport	voltage-gated potassium channel complex
GENE.evgtrinLocDN36788c0g1t13~~evgtrinLocDN36788c0g1t13.p2	4.50013	1.3259	0.000688755	0.0102133	NA	NA	NA	NA	NA	NA	NA	NA
GENE.evgHyS_ScswcV5_3204.g12875.t1~~evgHyS_ScswcV5_3204.g12875.t1.p1	5.51131	1.62416	0.000690505	0.0102154	evgHyS_ScswcV5_3204.g12875.t1.p1	PREDICTED: monocarboxylate transporter 10-like [Hydra vulgaris]	0	Monocarboxylate transporter 4	SLC16A10	monocarboxylic acid transmembrane transporter activity	transmembrane transport	integral component of membrane
GENE.evgMSTRG.101660.1~~evgMSTRG.101660.1.p3	6.64186	1.95996	0.000702047	0.0103599	evgMSTRG.101660.1.p3	Uncharacterized protein 259R [Exaiptasia pallida]	2.4	NA	NA	NA	NA	NA
GENE.evgHyS_ScswcV5_3215.g12996.t1~~evgHyS_ScswcV5_3215.g12996.t1.p1	6.01739	1.77608	0.000703986	0.0103709	evgHyS_ScswcV5_3215.g12996.t1.p1	methylenetetrahydrofolate reductase-like [Pocillopora damicornis]	0	Methylenetetrahydrofolate reductase	MTHFR	methylenetetrahydrofolate reductase (NAD(P)H) activity	tetrahydrofolate interconversion	cytosol
GENE.evgtrinLocDN5008c0g1t8~~evgtrinLocDN5008c0g1t8.p1	3.04315	0.898372	0.000705558	0.0103736	evgtrinLocDN5008c0g1t8.p1	hypothetical protein RP20_CCG014570 [Aedes albopictus]	5.22e-58	Integrase core domain protein (Fragment)	NA	nucleic acid binding	DNA integration	NA
GENE.evgtrinLocDN19288c0g2t10~~evgtrinLocDN19288c0g2t10.p1	3.66262	1.08198	0.000711533	0.0104215	evgtrinLocDN19288c0g2t10.p1	PREDICTED: uncharacterized protein LOC107356497 [Acropora digitifera]	4.02e-30	NA	NA	NA	NA	NA
GENE.evgHyS_ScswcV5_3885.g16792.t1~~evgHyS_ScswcV5_3885.g16792.t1.p1	3.25096	0.962827	0.000734213	0.0106862	NA	NA	NA	NA	NA	NA	NA	NA
GENE.evgHyS_ScswcV5_290.g1056.t1~~evgHyS_ScswcV5_290.g1056.t1.p1	3.39112	1.00445	0.000735234	0.0106862	evgHyS_ScswcV5_290.g1056.t1.p1	PREDICTED: gamma-aminobutyric acid receptor subunit rho-2-like [Hydra vulgaris]	2.15e-94	gamma-aminobutyric acid receptor subunit theta	NA	extracellular ligand-gated ion channel activity	ion transmembrane transport	plasma membrane
GENE.evgtrinLocDN60910c0g1t3~~evgtrinLocDN60910c0g1t3.p1	6.6161	1.96012	0.000737212	0.0107067	evgtrinLocDN60910c0g1t3.p1	linear amide C-N hydrolase [Lactobacillus silagincola]	0.67	NA	NA	NA	NA	NA
GENE.evgMSTRG.71044.4~~evgMSTRG.71044.4.p1	2.15353	0.638793	0.000748269	0.0108342	evgMSTRG.71044.4.p1	PREDICTED: uncharacterized protein LOC105849873 [Hydra vulgaris]	7.53e-108	NA	NA	NA	NA	NA
GENE.evgtrinLocDN6368c2g2t4~~evgtrinLocDN6368c2g2t4.p1	5.66446	1.68104	0.000752724	0.0108905	evgtrinLocDN6368c2g2t4.p1	hypothetical protein AC249_AIPGENE29181 [Exaiptasia pallida]	5.96e-22	NA	NA	NA	NA	NA
GENE.evgtrinLocDN62822c0g1t6~~evgtrinLocDN62822c0g1t6.p1	4.76038	1.41314	0.000755394	0.0109125	evgtrinLocDN62822c0g1t6.p1	PREDICTED: chitotriosidase-1-like [Hydra vulgaris]	6.34e-54	Glycoside hydrolase (Fragment)	NA	chitin binding	chitin metabolic process	extracellular region
GENE.evgtrinLocDN94208c0g1t3~~evgtrinLocDN94208c0g1t3.p1	7.62287	2.26367	0.000758577	0.0109502	evgtrinLocDN94208c0g1t3.p1	PREDICTED: uncharacterized protein LOC105843510 [Hydra vulgaris]	0.79	NA	NA	NA	NA	NA
GENE.evgMSTRG.63157.3~~evgMSTRG.63157.3.p1	5.62299	1.67044	0.000762204	0.0109942	evgMSTRG.63157.3.p1	Uncharacterized protein 259R [Exaiptasia pallida]	5.54e-06	NA	NA	NA	NA	NA
GENE.evgHyS_ScswcV5_3808.g16548.t1~~evgHyS_ScswcV5_3808.g16548.t1.p1	3.26014	0.972135	0.000797724	0.0114459	evgHyS_ScswcV5_3808.g16548.t1.p1	PREDICTED: uncharacterized protein LOC100205887 [Hydra vulgaris]	0	Cytochrome c oxidase subunit 5B, mitochondrial	NA	oxidoreductase activity, acting on a heme group of donors, oxygen as acceptor	proton transmembrane transport	mitochondrial envelope
GENE.evgHyS_ScswcV5_2556.g10590.t1~~evgHyS_ScswcV5_2556.g10590.t1.p1	3.72467	1.11142	0.000804365	0.0114962	evgHyS_ScswcV5_2556.g10590.t1.p1	PREDICTED: ufm1-specific protease 2-like [Hydra vulgaris]	1.33e-146	Ufm1-specific protease	UFSP2	peptidase activity	proteolysis	endoplasmic reticulum
GENE.evgtrinLocDN3118c0g1t3~~evgtrinLocDN3118c0g1t3.p1	7.2463	2.16431	0.000813712	0.0115966	evgtrinLocDN3118c0g1t3.p1	DUF4302 domain-containing protein [Pedobacter caeni]	1.4	NA	NA	NA	NA	NA
GENE.evgHyS_ScswcV5_1188.g4289.t1~~evgHyS_ScswcV5_1188.g4289.t1.p1	4.18743	1.25486	0.000846951	0.0120074	evgHyS_ScswcV5_1188.g4289.t1.p1	PREDICTED: histone-lysine N-methyltransferase, H3 lysine-79 specific-like [Hydra vulgaris]	0	NA	NA	NA	NA	NA
GENE.evgtrinLocDN55184c0g1t2~~evgtrinLocDN55184c0g1t2.p2	7.23972	2.16982	0.000848259	0.0120132	evgtrinLocDN55184c0g1t2.p2	pleckstrin homology-like domain family B member 1 isoform X1 [Ceratitis capitata]	5.7	NA	NA	NA	NA	NA
GENE.evgHyS_ScswcV5_457.g1602.t1~~evgHyS_ScswcV5_457.g1602.t1.p1	2.32694	0.697435	0.000848625	0.0120132	evgHyS_ScswcV5_457.g1602.t1.p1	PREDICTED: plasma membrane calcium-transporting ATPase 3 [Hydra vulgaris]	0	Plasma membrane calcium-transporting ATPase	ATP2B3	calcium-transporting ATPase activity	calcium ion transmembrane transport	integral component of membrane
GENE.evgtrinLocDN45286c0g1t10~~evgtrinLocDN45286c0g1t10.p4	7.70845	2.31256	0.00085821	0.0121258	evgtrinLocDN45286c0g1t10.p4	helix-turn-helix domain-containing protein [Mesorhizobium sp. M1A.F.Ca.ET.072.01.1.1]	2.82e-16	NA	NA	NA	NA	NA
GENE.evgHyS_ScswcV5_662.g2582.t1~~evgHyS_ScswcV5_662.g2582.t1.p1	2.34019	0.702083	0.00085849	0.0121258	evgHyS_ScswcV5_662.g2582.t1.p1	syntaxin-binding protein 5-like isoform X4 [Pomacea canaliculata]	0	syntaxin-binding protein 5	STXBP5	syntaxin-1 binding	vesicle-mediated transport	integral component of membrane
GENE.evgMSTRG.100245.1~~evgMSTRG.100245.1.p1	4.27679	1.28337	0.000860785	0.0121446	evgMSTRG.100245.1.p1	PREDICTED: uncharacterized protein LOC107354266 [Acropora digitifera]	9.69e-39	NA	NA	NA	NA	NA
GENE.evgtrinLocDN1123c0g1t6~~evgtrinLocDN1123c0g1t6.p1	5.57803	1.67412	0.000862483	0.0121552	evgtrinLocDN1123c0g1t6.p1	WDFY family member 4 [Clonorchis sinensis]	4.38e-17	NA	NA	NA	NA	NA
GENE.evgtrinLocDN36940c0g1t2~~evgtrinLocDN36940c0g1t2.p1	3.8527	1.15755	0.000873687	0.0122797	NA	NA	NA	NA	NA	NA	NA	NA
GENE.evgHyS_ScswcV5_3094.g12217.t1~~evgHyS_ScswcV5_3094.g12217.t1.p1	4.88047	1.46667	0.000876057	0.012301	evgHyS_ScswcV5_3094.g12217.t1.p1	PREDICTED: probable glutamate receptor [Hydra vulgaris]	3.44e-53	Glutamate receptor ionotropic, NMDA 1	NA	ionotropic glutamate receptor activity	ionotropic glutamate receptor signaling pathway	postsynaptic membrane
GENE.evgHyS_ScswcV5_1750.g6833.t1~~evgHyS_ScswcV5_1750.g6833.t1.p1	3.05498	0.918142	0.000876754	0.0123017	evgHyS_ScswcV5_1750.g6833.t1.p1	PREDICTED: rabankyrin-5-like isoform X2 [Hydra vulgaris]	0	Ankyrin repeat and FYVE domain-containing protein 1	ANKFY1	metal ion binding	positive regulation of pinocytosis	pinosome
GENE.evgtrinLocDN58920c0g2t2~~evgtrinLocDN58920c0g2t2.p1	6.32481	1.9014	0.00087976	0.0123348	evgtrinLocDN58920c0g2t2.p1	PREDICTED: uncharacterized protein LOC105439168 [Strongylocentrotus purpuratus]	8.75e-10	NA	NA	NA	NA	NA
GENE.evgtrinLocDN67501c0g2t2~~evgtrinLocDN67501c0g2t2.p1	5.46739	1.64471	0.000886652	0.0124223	evgtrinLocDN67501c0g2t2.p1	predicted protein [Nematostella vectensis]	3.81e-05	NA	NA	NA	NA	NA
GENE.evgHyS_ScswcV5_457.g1858.t1~~evgHyS_ScswcV5_457.g1858.t1.p1	3.36378	1.01233	0.000891204	0.0124677	evgHyS_ScswcV5_457.g1858.t1.p1	PREDICTED: AN1-type zinc finger protein 2A-like [Hydra vulgaris]	7.35e-66	Zinc finger AN1-type containing 2B	NA	zinc ion binding	cellular response to arsenic-containing substance	proteasome complex
GENE.evgtrinLocDN20388c0g2t4~~evgtrinLocDN20388c0g2t4.p1	5.53011	1.66491	0.00089513	0.0125042	evgtrinLocDN20388c0g2t4.p1	SCY1-like protein [Fonsecaea monophora]	2.1	NA	NA	NA	NA	NA
GENE.evgMSTRG.71725.6~~evgMSTRG.71725.6.p5	3.52036	1.06008	0.000897444	0.012509	NA	NA	NA	NA	NA	NA	NA	NA
GENE.evgtrinLocDN99862c0g1t3~~evgtrinLocDN99862c0g1t3.p1	8.22315	2.4796	0.000912097	0.0126674	evgtrinLocDN99862c0g1t3.p1	hypothetical protein [Ahniella affigens]	6.6	NA	NA	NA	NA	NA
GENE.evgHyS_ScswcV5_2402.g8854.t1~~evgHyS_ScswcV5_2402.g8854.t1.p1	2.04432	0.617349	0.000928133	0.0128615	evgHyS_ScswcV5_2402.g8854.t1.p1	calmodulin-binding transcription activator 2-like isoform X2 [Acanthaster planci]	1.14e-39	NA	NA	NA	NA	NA
GENE.evgtrinLocDN31979c0g1t18~~evgtrinLocDN31979c0g1t18.p1	4.13701	1.24944	0.000929329	0.0128687	NA	NA	NA	NA	NA	NA	NA	NA
GENE.evgtrinLocDN162c0g2t3~~evgtrinLocDN162c0g2t3.p1	5.49483	1.65996	0.00093221	0.0128992	evgtrinLocDN162c0g2t3.p1	uncharacterized protein A4U43_C05F16370 [Asparagus officinalis]	2	NA	NA	NA	NA	NA
GENE.evgtrinLocDN12882c0g1t10~~evgtrinLocDN12882c0g1t10.p1	6.62375	2.00294	0.000942976	0.0130198	evgtrinLocDN12882c0g1t10.p1	hypothetical protein AC249_AIPGENE7656 [Exaiptasia pallida]	1.37e-15	NA	NA	NA	NA	NA
GENE.evgHyS_ScswcV5_4075.g18695.t1~~evgHyS_ScswcV5_4075.g18695.t1.p1	2.9981	0.906979	0.000947755	0.0130763	evgHyS_ScswcV5_4075.g18695.t1.p1	PREDICTED: zinc finger protein ZIC 4-like [Hydra vulgaris]	7.7e-175	Zinc finger protein Ssu-Zic	ZIC3	RNA polymerase II regulatory region sequence-specific DNA binding	determination of pancreatic left/right asymmetry	nucleoplasm
GENE.evgHyS_ScswcV5_2556.g10356.t1~~evgHyS_ScswcV5_2556.g10356.t1.p1	2.80235	0.847987	0.000950762	0.0131023	evgHyS_ScswcV5_2556.g10356.t1.p1	PREDICTED: nucleoporin NUP188 homolog [Hydra vulgaris]	0	NA	NA	NA	NA	NA
GENE.evgHyS_ScswcV5_1000.g4066.t1~~evgHyS_ScswcV5_1000.g4066.t1.p1	2.72804	0.826362	0.000962517	0.0132511	evgHyS_ScswcV5_1000.g4066.t1.p1	laminin subunit alpha-like [Stylophora pistillata]	0	NA	NA	NA	NA	NA
GENE.evgtrinLocDN112c1g1t2~~evgtrinLocDN112c1g1t2.p1	4.89728	1.48446	0.000970163	0.0133399	evgtrinLocDN112c1g1t2.p1	PREDICTED: uncharacterized protein K02A2.6-like, partial [Priapulus caudatus]	4.26e-37	NA	NA	NA	NA	NA
GENE.evgtrinLocDN46002c0g3t10~~evgtrinLocDN46002c0g3t10.p1	6.92578	2.10021	0.00097493	0.013393	evgtrinLocDN46002c0g3t10.p1	outer membrane protein assembly factor BamA [Xanthomonas massiliensis]	2.1	NA	NA	NA	NA	NA
GENE.evgHyS_ScswcV5_644.g2353.t1~~evgHyS_ScswcV5_644.g2353.t1.p1	2.87101	0.871226	0.000982915	0.0134638	evgHyS_ScswcV5_644.g2353.t1.p1	PREDICTED: neural Wiskott-Aldrich syndrome protein-like [Hydra vulgaris]	8.17e-103	Wiskott-Aldrich syndrome like	WAS	actin binding	positive regulation of Arp2/3 complex-mediated actin nucleation	actin filament
GENE.evgMSTRG.61691.1~~evgMSTRG.61691.1.p1	6.50288	1.97449	0.000989682	0.0135273	evgMSTRG.61691.1.p1	neuromedin-U receptor 2-like [Orbicella faveolata]	2.77e-05	NA	NA	NA	NA	NA
GENE.evgHyS_ScswcV5_2548.g9980.t1~~evgHyS_ScswcV5_2548.g9980.t1.p1	3.03232	0.921083	0.000994327	0.0135811	evgHyS_ScswcV5_2548.g9980.t1.p1	predicted protein [Nematostella vectensis]	2.76e-38	NA	NA	NA	NA	NA
GENE.evgMSTRG.65056.5~~evgMSTRG.65056.5.p1	4.30709	1.30969	0.00100672	0.0136816	evgMSTRG.65056.5.p1	extracellular calcium-sensing receptor-like [Stylophora pistillata]	3.93e-51	NA	NA	NA	NA	NA
GENE.evgMSTRG.97606.1~~evgMSTRG.97606.1.p1	6.87163	2.09325	0.00102799	0.0139211	NA	NA	NA	NA	NA	NA	NA	NA
GENE.evgHyS_ScswcV5_366.g1361.t1~~evgHyS_ScswcV5_366.g1361.t1.p1	2.18356	0.666391	0.00105029	0.0142129	evgHyS_ScswcV5_366.g1361.t1.p1	PREDICTED: lethal(2) giant larvae protein homolog 1 isoform X2 [Hydra vulgaris]	0	LLGL scribble cell polarity complex component 2	LLGL2	PDZ domain binding	establishment of spindle orientation	cortical cytoskeleton
GENE.evgHyS_ScswcV5_3896.g17191.t1~~evgHyS_ScswcV5_3896.g17191.t1.p1	3.34483	1.02213	0.00106639	0.0143593	evgHyS_ScswcV5_3896.g17191.t1.p1	PREDICTED: uncharacterized protein LOC105845533 [Hydra vulgaris]	1.46e-45	NA	NA	NA	NA	NA
GENE.evgtrinLocDN27780c0g1t7~~evgtrinLocDN27780c0g1t7.p1	2.98406	0.913141	0.00108345	0.0145787	evgtrinLocDN27780c0g1t7.p1	tRNA lysidine(34) synthetase TilS [Streptococcus acidominimus]	4.2	NA	NA	NA	NA	NA
GENE.evgMSTRG.89780.1~~evgMSTRG.89780.1.p1	6.09805	1.86627	0.00108501	0.0145894	NA	NA	NA	NA	NA	NA	NA	NA
GENE.evgHyS_ScswcV5_4062.g18421.t1~~evgHyS_ScswcV5_4062.g18421.t1.p1	7.42463	2.27485	0.00109932	0.014761	evgHyS_ScswcV5_4062.g18421.t1.p1	PREDICTED: uncharacterized protein LOC105848003 [Hydra vulgaris]	8.91e-30	NA	NA	NA	NA	NA
GENE.evgtrinLocDN23406c1g2t1~~evgtrinLocDN23406c1g2t1.p1	7.62254	2.33612	0.00110274	0.0147965	evgtrinLocDN23406c1g2t1.p1	hypothetical protein DRQ32_08175 [bacterium]	5.9	NA	NA	NA	NA	NA
GENE.evgtrinLocDN30331c0g1t3~~evgtrinLocDN30331c0g1t3.p1	3.69833	1.13375	0.00110617	0.014832	evgtrinLocDN30331c0g1t3.p1	PREDICTED: uncharacterized protein PFB0145c-like [Hydra vulgaris]	1.27e-24	NA	NA	NA	NA	NA
GENE.evgtrinLocDN1c7g1t6~~evgtrinLocDN1c7g1t6.p1	4.91304	1.50734	0.00111646	0.0149279	evgtrinLocDN1c7g1t6.p1	hypothetical protein Glove_421g102 [Diversispora versiformis]	0.18	NA	NA	NA	NA	NA
GENE.evgHyS_ScswcV5_290.g1117.t1~~evgHyS_ScswcV5_290.g1117.t1.p1	2.75463	0.845477	0.00112172	0.014972	NA	NA	NA	NA	NA	NA	NA	NA
GENE.evgMSTRG.33154.1~~evgMSTRG.33154.1.p2	4.84181	1.48786	0.00113708	0.0151089	evgMSTRG.33154.1.p2	2-succinyl-5-enolpyruvyl-6-hydroxy-3-cyclohexene-1-carboxylic-acid synthase [Acidimicrobiales bacterium]	5.8	NA	NA	NA	NA	NA
GENE.evgtrinLocDN29919c0g1t13~~evgtrinLocDN29919c0g1t13.p1	5.83661	1.79723	0.00116401	0.0153908	evgtrinLocDN29919c0g1t13.p1	neuropeptide-like GPCR, partial [Tripedalia cystophora]	2.86e-34	NA	NA	NA	NA	NA
GENE.evgHyS_ScswcV5_644.g2463.t1~~evgHyS_ScswcV5_644.g2463.t1.p1	2.04722	0.630664	0.00116981	0.0154331	evgHyS_ScswcV5_644.g2463.t1.p1	PREDICTED: WAS/WASL-interacting protein family member 1-like [Hydra vulgaris]	0.002	Related to VRP1-Proline-rich actin-associated protein involved in cytoskeletal organization and cytokinesis	WIPF1	actin binding	actin polymerization or depolymerization	actin cytoskeleton
GENE.evgHyS_ScswcV5_1786.g7381.t1~~evgHyS_ScswcV5_1786.g7381.t1.p1	7.13108	2.19701	0.00117116	0.0154331	evgHyS_ScswcV5_1786.g7381.t1.p1	hypothetical protein PRIPAC_33160, partial [Pristionchus pacificus]	6.01e-67	NA	NA	NA	NA	NA
GENE.evgtrinLocDN76090c0g5t1~~evgtrinLocDN76090c0g5t1.p2	6.71169	2.06782	0.00117126	0.0154331	evgtrinLocDN76090c0g5t1.p2	PREDICTED: uncharacterized protein K02A2.6-like [Hydra vulgaris]	0.001	NA	NA	NA	NA	NA
GENE.evgMSTRG.16299.1~~evgMSTRG.16299.1.p1	6.65743	2.05186	0.00117621	0.0154769	evgMSTRG.16299.1.p1	hypothetical protein BEM40_002700 [Escherichia sp. MOD1-EC5451]	3.5	NA	NA	NA	NA	NA
GENE.evgHyS_ScswcV5_4509.g21565.t1~~evgHyS_ScswcV5_4509.g21565.t1.p1	3.5446	1.0928	0.00118035	0.0154992	evgHyS_ScswcV5_4509.g21565.t1.p1	PREDICTED: metabotropic glutamate receptor 3-like [Hydra vulgaris]	8.83e-110	NA	NA	NA	NA	NA
GENE.evgMSTRG.7750.3~~evgMSTRG.7750.3.p1	2.61124	0.805225	0.00118332	0.0155276	evgMSTRG.7750.3.p1	PREDICTED: ATP-binding cassette sub-family A member 3-like [Hydra vulgaris]	0	ATP-binding cassette	NA	ATPase activity, coupled to transmembrane movement of substances	regulation of intracellular sterol transport	lysosome
GENE.evgMSTRG.125288.1~~evgMSTRG.125288.1.p1	3.05429	0.94225	0.00118906	0.0155921	evgMSTRG.125288.1.p1	PREDICTED: cubilin isoform X1 [Crassostrea gigas]	0	Cubilin (intrinsic factor-cobalamin receptor)	CUBN	calcium ion binding	lipoprotein transport	extracellular exosome
GENE.evgtrinLocDN2468c2g1t6~~evgtrinLocDN2468c2g1t6.p1	6.67841	2.06277	0.00120538	0.0157411	evgtrinLocDN2468c2g1t6.p1	hypothetical protein AC249_AIPGENE28114 [Exaiptasia pallida]	1.42e-31	NA	NA	NA	NA	NA
GENE.evgtrinLocDN147210c0g1t3~~evgtrinLocDN147210c0g1t3.p1	5.86832	1.81306	0.00120924	0.0157698	NA	NA	NA	NA	NA	NA	NA	NA
GENE.evgMSTRG.106534.6~~evgMSTRG.106534.6.p1	3.86591	1.19615	0.00122942	0.0159822	NA	NA	NA	NA	NA	NA	NA	NA
GENE.evgMSTRG.103612.1~~evgMSTRG.103612.1.p1	6.13779	1.8994	0.00123173	0.0159822	evgMSTRG.103612.1.p1	hypothetical protein AC249_AIPGENE26930 [Exaiptasia pallida]	8.22e-11	NA	NA	NA	NA	NA
GENE.evgtrinLocDN18160c0g1t11~~evgtrinLocDN18160c0g1t11.p1	3.56925	1.10517	0.00123964	0.0160328	evgtrinLocDN18160c0g1t11.p1	PREDICTED: uncharacterized protein LOC107356494 [Acropora digitifera]	5.47e-54	Glutamate--tRNA ligase (Fragment)	NA	RNA-directed DNA polymerase activity	DNA metabolic process	intermediate filament
GENE.evgMSTRG.93725.5~~evgMSTRG.93725.5.p1	2.61191	0.808782	0.00124035	0.0160328	evgMSTRG.93725.5.p1	PREDICTED: ABC transporter B family member 1-like, partial [Hydra vulgaris]	0	Lipid A export ATP-binding/permease protein MsbA	NA	ATPase activity, coupled to transmembrane movement of substances	transmembrane transport	integral component of membrane
GENE.evgMSTRG.41436.1~~evgMSTRG.41436.1.p1	5.73385	1.77626	0.00124638	0.0160998	evgMSTRG.41436.1.p1	predicted protein [Nematostella vectensis]	1.24e-41	NA	NA	NA	NA	NA
GENE.evgHyS_ScswcV5_4075.g18486.t1~~evgHyS_ScswcV5_4075.g18486.t1.p1	2.91525	0.90353	0.00125308	0.0161644	evgHyS_ScswcV5_4075.g18486.t1.p1	PREDICTED: surfeit locus protein 4-like [Hydra vulgaris]	3.09e-150	Surfeit gene 4	SURF4	protein binding	Golgi organization	endoplasmic reticulum-Golgi intermediate compartment
GENE.evgtrinLocDN2305c0g1t4~~evgtrinLocDN2305c0g1t4.p1	2.47739	0.768607	0.00126758	0.0163293	evgtrinLocDN2305c0g1t4.p1	PREDICTED: cubilin isoform X2 [Crassostrea gigas]	0	Cubilin	CUBN	calcium ion binding	lipoprotein transport	brush border
GENE.evgtrinLocDN7177c0g1t7~~evgtrinLocDN7177c0g1t7.p1	3.98878	1.23765	0.00126911	0.0163379	evgtrinLocDN7177c0g1t7.p1	Extracellular calcium-sensing receptor [Stylophora pistillata]	9.53e-30	NA	NA	NA	NA	NA
GENE.evgMSTRG.92325.1~~evgMSTRG.92325.1.p2	7.64947	2.37527	0.00127981	0.0164535	evgMSTRG.92325.1.p2	predicted protein [Nematostella vectensis]	9.12e-32	NA	NA	NA	NA	NA
GENE.evgtrinLocDN30924c0g1t8~~evgtrinLocDN30924c0g1t8.p1	5.27853	1.63918	0.0012809	0.0164564	evgtrinLocDN30924c0g1t8.p1	hypothetical protein [Bradyrhizobium paxllaeri]	4.5	NA	NA	NA	NA	NA
GENE.evgMSTRG.13192.1~~evgMSTRG.13192.1.p1	3.44541	1.07087	0.00129368	0.0165759	evgMSTRG.13192.1.p1	Piso0_003097 [Millerozyma farinosa CBS 7064]	1.4	NA	NA	NA	NA	NA
GENE.evgtrinLocDN1578c0g1t16~~evgtrinLocDN1578c0g1t16.p1	2.28215	0.709451	0.00129634	0.0165876	evgtrinLocDN1578c0g1t16.p1	PREDICTED: uncharacterized protein LOC100208603 [Hydra vulgaris]	9.31e-128	NA	NA	NA	NA	NA
GENE.evgHyS_ScswcV5_4378.g20503.t1~~evgHyS_ScswcV5_4378.g20503.t1.p1	4.41827	1.37458	0.00130779	0.0167228	evgHyS_ScswcV5_4378.g20503.t1.p1	PREDICTED: uncharacterized protein LOC105843114 [Hydra vulgaris]	1.81e-07	NA	NA	NA	NA	NA
GENE.evgMSTRG.105702.1~~evgMSTRG.105702.1.p1	5.62346	1.75148	0.00132416	0.0168873	evgMSTRG.105702.1.p1	unnamed protein product [Angiostrongylus costaricensis]	0.87	NA	NA	NA	NA	NA
GENE.evgMSTRG.34742.2~~evgMSTRG.34742.2.p1	2.25531	0.702668	0.00132902	0.0169115	evgMSTRG.34742.2.p1	PREDICTED: E3 ubiquitin-protein ligase NEDD4-like isoform X2 [Hydra vulgaris]	0	E3 ubiquitin-protein ligase	NA	ubiquitin protein ligase activity	protein ubiquitination	postsynaptic cytosol
GENE.evgtrinLocDN14581c1g1t3~~evgtrinLocDN14581c1g1t3.p1	7.63647	2.38029	0.00133562	0.0169648	evgtrinLocDN14581c1g1t3.p1	uncharacterized protein LOC110045927, partial [Orbicella faveolata]	4.62e-10	NA	NA	NA	NA	NA
GENE.evgMSTRG.7629.10~~evgMSTRG.7629.10.p1	2.25957	0.704611	0.00134208	0.0170241	evgMSTRG.7629.10.p1	PREDICTED: multidrug resistance protein 1 [Hydra vulgaris]	0	Multidrug resistance protein 1	ABCB4	ATPase activity, coupled to transmembrane movement of substances	transmembrane transport	intercellular canaliculus
GENE.evgMSTRG.105084.1~~evgMSTRG.105084.1.p1	3.71823	1.16013	0.00135062	0.0171096	evgMSTRG.105084.1.p1	SAM-dependent methyltransferase [Streptomyces sp. TSRI0261]	2.6	NA	NA	NA	NA	NA
GENE.evgtrinLocDN7849c0g2t4~~evgtrinLocDN7849c0g2t4.p1	3.52008	1.09843	0.00135233	0.0171199	evgtrinLocDN7849c0g2t4.p1	PREDICTED: probable ATP-dependent RNA helicase DHX37 [Hydra vulgaris]	7.14e-34	probable ATP-dependent RNA helicase kurz	NA	helicase activity	maturation of SSU-rRNA from tricistronic rRNA transcript (SSU-rRNA, 5.8S rRNA, LSU-rRNA)	nucleolus
GENE.evgMSTRG.42548.1~~evgMSTRG.42548.1.p2	3.34983	1.04569	0.00135778	0.0171434	evgMSTRG.42548.1.p2	uncharacterized protein LOC112906239 [Agrilus planipennis]	2.76e-33	NA	NA	NA	NA	NA
GENE.evgHyS_ScswcV5_1783.g7117.t1~~evgHyS_ScswcV5_1783.g7117.t1.p1	3.40268	1.06241	0.00136108	0.0171736	evgHyS_ScswcV5_1783.g7117.t1.p1	beta-1,3-galactosyltransferase 5-like [Orbicella faveolata]	1.24e-70	Hexosyltransferase	B3GNT4	galactosyltransferase activity	protein glycosylation	Golgi membrane
GENE.evgtrinLocDN7341c0g1t2~~evgtrinLocDN7341c0g1t2.p1	1.92998	0.60272	0.00136421	0.0172016	evgtrinLocDN7341c0g1t2.p1	PREDICTED: pleckstrin homology-like domain family B member 1 [Hydra vulgaris]	0	Pleckstrin homology-like domain family B member 2 (Fragment)	NA	DNA-binding transcription factor activity	positive regulation of basement membrane assembly involved in embryonic body morphogenesis	basal cortex
GENE.evgHyS_ScswcV5_3470.g14781.t1~~evgHyS_ScswcV5_3470.g14781.t1.p1	2.32274	0.725809	0.00137329	0.0172704	evgHyS_ScswcV5_3470.g14781.t1.p1	PREDICTED: neutral alpha-glucosidase AB [Hydra vulgaris]	0	Neutral alpha-glucosidase AB precursor	NA	carbohydrate binding	carbohydrate metabolic process	glucosidase II complex
GENE.evgtrinLocDN123782c0g2t13~~evgtrinLocDN123782c0g2t13.p1	6.97465	2.18055	0.00138106	0.0173567	evgtrinLocDN123782c0g2t13.p1	uncharacterized protein LOC107453613 [Parasteatoda tepidariorum]	2.44e-18	NA	NA	NA	NA	NA
GENE.evgtrinLocDN1700c12g1t8~~evgtrinLocDN1700c12g1t8.p1	4.26263	1.33316	0.00138677	0.0174055	evgtrinLocDN1700c12g1t8.p1	hypothetical protein AC249_AIPGENE2056 [Exaiptasia pallida]	5.73e-07	NA	NA	NA	NA	NA
GENE.evgtrinLocDN10361c0g1t23~~evgtrinLocDN10361c0g1t23.p1	4.79773	1.50065	0.00138822	0.0174122	evgtrinLocDN10361c0g1t23.p1	PREDICTED: uncharacterized protein LOC105845339 [Hydra vulgaris]	1.54e-33	39S ribosomal protein L4,mitochondrial	RPLD	structural constituent of ribosome	translation	ribosome
GENE.evgHyS_ScswcV5_3655.g15761.t1~~evgHyS_ScswcV5_3655.g15761.t1.p1	3.36704	1.05422	0.00140379	0.0175843	evgHyS_ScswcV5_3655.g15761.t1.p1	dynein heavy chain 8, axonemal-like [Exaiptasia pallida]	0	Dynein axonemal heavy chain 8	DNAH8	microtubule motor activity	microtubule-based movement	dynein complex
GENE.evgHyS_ScswcV5_66.g476.t1~~evgHyS_ScswcV5_66.g476.t1.p1	4.14632	1.29945	0.00141872	0.017713	evgHyS_ScswcV5_66.g476.t1.p1	PREDICTED: glutamyl-tRNA(Gln) amidotransferase subunit A, chloroplastic/mitochondrial-like isoform X1 [Hydra vulgaris]	0	Asp-tRNA(Asn)/Glu-tRNA(Gln) amidotransferase GatCAB subunit A	NA	indoleacetamide hydrolase activity	NA	NA
GENE.evgtrinLocDN42186c0g1t1~~evgtrinLocDN42186c0g1t1.p1	5.81412	1.82822	0.00147171	0.0182431	evgtrinLocDN42186c0g1t1.p1	hypothetical protein LCMAC101_05750 [Marseillevirus LCMAC101]	5e-17	NA	NA	NA	NA	NA
GENE.evgtrinLocDN8878c0g1t5~~evgtrinLocDN8878c0g1t5.p2	3.28465	1.03395	0.00148902	0.0184189	evgtrinLocDN8878c0g1t5.p2	PREDICTED: uncharacterized protein K02A2.6-like [Hydra vulgaris]	3.95e-20	NA	NA	NA	NA	NA
GENE.evgMSTRG.123493.1~~evgMSTRG.123493.1.p1	4.66197	1.46776	0.0014919	0.0184297	evgMSTRG.123493.1.p1	J domain-containing protein [Mesorhizobium sp. B2.3]	6	NA	NA	NA	NA	NA
GENE.evgtrinLocDN13474c0g1t10~~evgtrinLocDN13474c0g1t10.p1	5.14419	1.61984	0.00149449	0.0184297	NA	NA	NA	NA	NA	NA	NA	NA
GENE.evgtrinLocDN154660c0g1t18~~evgtrinLocDN154660c0g1t18.p1	7.25396	2.28651	0.00151131	0.0185887	evgtrinLocDN154660c0g1t18.p1	hypothetical protein [Saccharothrix sp. ALI-22-I]	0.34	NA	NA	NA	NA	NA
GENE.evgtrinLocDN89471c0g1t10~~evgtrinLocDN89471c0g1t10.p1	3.48223	1.10077	0.00155907	0.0190805	evgtrinLocDN89471c0g1t10.p1	DMT family transporter [Flavobacterium album]	4.2	NA	NA	NA	NA	NA
GENE.evgHyS_ScswcV5_2427.g9189.t1~~evgHyS_ScswcV5_2427.g9189.t1.p1	2.27635	0.719902	0.00156674	0.0191345	evgHyS_ScswcV5_2427.g9189.t1.p1	PREDICTED: kinesin-II 85 kDa subunit-like [Hydra vulgaris]	3.2e-93	NA	NA	NA	NA	NA
GENE.evgtrinLocDN40084c0g1t6~~evgtrinLocDN40084c0g1t6.p1	6.64084	2.10087	0.00157229	0.019169	evgtrinLocDN40084c0g1t6.p1	PREDICTED: uncharacterized protein LOC754317 [Strongylocentrotus purpuratus]	0.02	NA	NA	NA	NA	NA
GENE.evgtrinLocDN16314c0g2t12~~evgtrinLocDN16314c0g2t12.p1	6.34366	2.00693	0.00157296	0.019169	evgtrinLocDN16314c0g2t12.p1	LOW QUALITY PROTEIN: protein bassoon-like [Labrus bergylta]	0.009	NA	NA	NA	NA	NA
GENE.evgHyS_ScswcV5_4079.g18980.t1~~evgHyS_ScswcV5_4079.g18980.t1.p1	3.43746	1.08754	0.00157362	0.019169	evgHyS_ScswcV5_4079.g18980.t1.p1	DNA excision repair protein ERCC-6-like 2 [Stylophora pistillata]	0	ERCC excision repair 6 like 2	NA	ATP binding	interstrand cross-link repair	centrosome
GENE.evgMSTRG.47365.1~~evgMSTRG.47365.1.p1	4.74926	1.50284	0.00157661	0.019169	evgMSTRG.47365.1.p1	nucleolar protein [Nematocida parisii ERTm1]	0.46	NA	NA	NA	NA	NA
GENE.evgHyS_ScswcV5_4270.g19680.t1~~evgHyS_ScswcV5_4270.g19680.t1.p1	6.24458	1.97723	0.00158718	0.0192628	evgHyS_ScswcV5_4270.g19680.t1.p1	PREDICTED: discoidin domain-containing receptor 2 isoform X2 [Hydra vulgaris]	3.98e-73	NA	NA	NA	NA	NA
GENE.evgtrinLocDN310099c0g1t1~~evgtrinLocDN310099c0g1t1.p1	7.71165	2.4419	0.00158824	0.0192628	NA	NA	NA	NA	NA	NA	NA	NA
GENE.evgtrinLocDN21102c0g1t13~~evgtrinLocDN21102c0g1t13.p1	2.66948	0.845788	0.00159837	0.0193347	evgtrinLocDN21102c0g1t13.p1	PREDICTED: non-specific lipid-transfer protein-like [Hydra vulgaris]	0	Acetyl-CoA acyltransferase	SCP2	transferase activity, transferring acyl groups other than amino-acyl groups	positive regulation of intracellular lipid transport	peroxisome
GENE.evgMSTRG.34805.1~~evgMSTRG.34805.1.p1	7.01933	2.22566	0.00161149	0.0194441	evgMSTRG.34805.1.p1	Uncharacterized protein 259R [Exaiptasia pallida]	3.54e-11	NA	NA	NA	NA	NA
GENE.evgtrinLocDN8427c0g1t10~~evgtrinLocDN8427c0g1t10.p1	5.02405	1.59332	0.00161488	0.0194726	evgtrinLocDN8427c0g1t10.p1	uncharacterized protein K02A2.6-like [Temnothorax curvispinosus]	2.09e-34	NA	NA	NA	NA	NA
GENE.evgtrinLocDN18234c0g2t4~~evgtrinLocDN18234c0g2t4.p1	7.58177	2.40612	0.00162696	0.0195687	evgtrinLocDN18234c0g2t4.p1	protein of unknown function (DUF4116) [Candidatus Kentron sp. TC]	1.67e-14	NA	NA	NA	NA	NA
GENE.evgMSTRG.66884.1~~evgMSTRG.66884.1.p3	4.04181	1.28283	0.00162877	0.0195781	evgMSTRG.66884.1.p3	PREDICTED: uncharacterized protein LOC107399197 [Tribolium castaneum]	5.71e-27	NA	NA	NA	NA	NA
GENE.evgHyS_ScswcV5_674.g3098.t1~~evgHyS_ScswcV5_674.g3098.t1.p1	2.3954	0.760569	0.00163562	0.0196233	evgHyS_ScswcV5_674.g3098.t1.p1	PREDICTED: mitogen-activated protein kinase kinase kinase 1-like [Hydra vulgaris]	0	Mitogen-activated protein kinase kinase kinase 1 (Fragment)	NA	protein kinase activity	protein phosphorylation	cytoplasm
GENE.evgMSTRG.117155.1~~evgMSTRG.117155.1.p1	6.76617	2.14884	0.0016397	0.0196598	evgMSTRG.117155.1.p1	PREDICTED: uncharacterized protein LOC101236484 [Hydra vulgaris]	5.96e-48	NA	NA	NA	NA	NA
GENE.evgHyS_ScswcV5_4475.g21276.t1~~evgHyS_ScswcV5_4475.g21276.t1.p1	2.56274	0.814219	0.00164681	0.0197327	evgHyS_ScswcV5_4475.g21276.t1.p1	PREDICTED: uncharacterized protein LOC100200608 isoform X1 [Hydra vulgaris]	1.97e-112	NA	NA	NA	NA	NA
GENE.evgMSTRG.37124.1~~evgMSTRG.37124.1.p1	2.85778	0.908345	0.0016544	0.0197955	evgMSTRG.37124.1.p1	MULTISPECIES: orotate phosphoribosyltransferase [Sporomusaceae]	5.2	NA	NA	NA	NA	NA
GENE.evgHyS_ScswcV5_4270.g20007.t1~~evgHyS_ScswcV5_4270.g20007.t1.p1	2.73361	0.869013	0.00165715	0.0197955	evgHyS_ScswcV5_4270.g20007.t1.p1	PREDICTED: protein EFR3 homolog B-like [Hydra vulgaris]	0	Protein EFR3 like protein B	EFR3BB	NA	protein localization to plasma membrane	plasma membrane
GENE.evgtrinLocDN1838c0g2t2~~evgtrinLocDN1838c0g2t2.p1	6.1861	1.96885	0.00167804	0.0199937	NA	NA	NA	NA	NA	NA	NA	NA
GENE.evgMSTRG.17510.1~~evgMSTRG.17510.1.p1	4.9398	1.57242	0.00168068	0.0200006	evgMSTRG.17510.1.p1	hypothetical protein B0A48_15804 [Rachicladosporium antarcticum]	0.59	NA	NA	NA	NA	NA
GENE.evgMSTRG.139951.1~~evgMSTRG.139951.1.p1	3.56498	1.13667	0.00171077	0.0202821	evgMSTRG.139951.1.p1	PREDICTED: uncharacterized protein LOC107738138 [Sinocyclocheilus rhinocerous]	3.26e-24	NA	NA	NA	NA	NA
GENE.evgHyS_ScswcV5_2333.g8589.t1~~evgHyS_ScswcV5_2333.g8589.t1.p1	2.10595	0.671597	0.00171425	0.0203107	evgHyS_ScswcV5_2333.g8589.t1.p1	PREDICTED: amyloid beta A4 precursor protein-binding family A member 2-like [Hydra vulgaris]	0	Amyloid beta precursor protein binding family A member 2	APBA2	amyloid-beta binding	chemical synaptic transmission	synaptic vesicle
GENE.evgMSTRG.132792.1~~evgMSTRG.132792.1.p1	6.87076	2.19141	0.00171671	0.0203272	evgMSTRG.132792.1.p1	uncharacterized protein LOC111716290 [Eurytemora affinis]	1.35e-08	NA	NA	NA	NA	NA
GENE.evgtrinLocDN307337c0g2t1~~evgtrinLocDN307337c0g2t1.p1	8.25888	2.63432	0.00171792	0.0203288	evgtrinLocDN307337c0g2t1.p1	hypothetical protein [Alteromonas macleodii]	6.29e-138	NA	NA	NA	NA	NA
GENE.evgHyS_ScswcV5_1750.g6570.t1~~evgHyS_ScswcV5_1750.g6570.t1.p1	4.86893	1.5543	0.00173293	0.0204448	evgHyS_ScswcV5_1750.g6570.t1.p1	PREDICTED: uncharacterized protein LOC105846571 [Hydra vulgaris]	7.23e-40	NA	NA	NA	NA	NA
GENE.evgHyS_ScswcV5_1219.g4562.t1~~evgHyS_ScswcV5_1219.g4562.t1.p1	2.84288	0.907683	0.00173612	0.0204679	evgHyS_ScswcV5_1219.g4562.t1.p1	high-affinity lysophosphatidic acid receptor-like [Orbicella faveolata]	7.23e-82	high-affinity lysophosphatidic acid receptor	GPR45	G protein-coupled receptor activity	G protein-coupled receptor signaling pathway	integral component of membrane
GENE.evgMSTRG.65197.1~~evgMSTRG.65197.1.p1	3.86978	1.2357	0.00173827	0.0204806	evgMSTRG.65197.1.p1	glycosyltransferase WbuB [Nostoc sp. 3335mG]	5.4	NA	NA	NA	NA	NA
GENE.evgHyS_ScswcV5_3470.g14665.t1~~evgHyS_ScswcV5_3470.g14665.t1.p1	2.22779	0.711751	0.001748	0.0205445	evgHyS_ScswcV5_3470.g14665.t1.p1	PREDICTED: transcription factor 12-like isoform X1 [Hydra vulgaris]	7.9e-112	Transcription factor 4	TCF3	protein dimerization activity	positive regulation of neuron differentiation	transcription factor complex
GENE.evgMSTRG.55895.1~~evgMSTRG.55895.1.p1	4.57249	1.46096	0.00174932	0.0205472	evgMSTRG.55895.1.p1	hypothetical protein AC578_1595 [Pseudocercospora eumusae]	9.4	NA	NA	NA	NA	NA
GENE.evgHyS_ScswcV5_366.g1461.t1~~evgHyS_ScswcV5_366.g1461.t1.p1	2.36013	0.754331	0.00175541	0.0205892	evgHyS_ScswcV5_366.g1461.t1.p1	PREDICTED: uncharacterized protein LOC105848317 [Hydra vulgaris]	3.89e-19	NA	NA	NA	NA	NA
GENE.evgHyS_ScswcV5_1748.g6351.t1~~evgHyS_ScswcV5_1748.g6351.t1.p1	5.2074	1.66439	0.00175577	0.0205892	evgHyS_ScswcV5_1748.g6351.t1.p1	hypothetical protein RF11_07293 [Thelohanellus kitauei]	0.000478	NA	NA	NA	NA	NA
GENE.evgMSTRG.127990.1~~evgMSTRG.127990.1.p1	5.69448	1.82011	0.00175614	0.0205892	NA	NA	NA	NA	NA	NA	NA	NA
GENE.evgHyS_ScswcV5_3470.g14448.t1~~evgHyS_ScswcV5_3470.g14448.t1.p1	5.26275	1.68371	0.00177389	0.0207589	evgHyS_ScswcV5_3470.g14448.t1.p1	hypothetical protein BRAFLDRAFT_99970 [Branchiostoma floridae]	7.87e-08	NA	NA	NA	NA	NA
GENE.evgHyS_ScswcV5_664.g2850.t1~~evgHyS_ScswcV5_664.g2850.t1.p1	1.96585	0.629441	0.00178918	0.0208657	evgHyS_ScswcV5_664.g2850.t1.p1	PREDICTED: atrial natriuretic peptide receptor 1-like [Hydra vulgaris]	0	Guanylate cyclase	NA	guanylate cyclase activity	cGMP biosynthetic process	integral component of membrane
GENE.evgMSTRG.17071.1~~evgMSTRG.17071.1.p1	2.09319	0.67023	0.00178959	0.0208657	evgMSTRG.17071.1.p1	hypothetical protein AC249_AIPGENE20895 [Exaiptasia pallida]	0	Sulfatase-modifying factor 1	NA	G-rich strand telomeric DNA binding	heteroduplex formation	DNA replication factor A complex
GENE.evgtrinLocDN15145c0g1t9~~evgtrinLocDN15145c0g1t9.p1	5.61589	1.80147	0.00182454	0.021192	evgtrinLocDN15145c0g1t9.p1	uncharacterized protein LOC110251424, partial [Exaiptasia pallida]	9.63e-43	NA	NA	NA	NA	NA
GENE.evgtrinLocDN68044c1g1t3~~evgtrinLocDN68044c1g1t3.p1	7.74303	2.48438	0.00182899	0.0212082	NA	NA	NA	NA	NA	NA	NA	NA
GENE.evgHyS_ScswcV5_644.g2192.t1~~evgHyS_ScswcV5_644.g2192.t1.p1	2.8176	0.906239	0.00187651	0.0216718	evgHyS_ScswcV5_644.g2192.t1.p1	glutamate receptor ionotropic, NMDA 1-like [Pocillopora damicornis]	8.46e-56	NA	NA	NA	NA	NA
GENE.evgtrinLocDN22400c2g1t13~~evgtrinLocDN22400c2g1t13.p1	5.70615	1.83534	0.00187693	0.0216718	evgtrinLocDN22400c2g1t13.p1	protein kinase [Melittangium boletus]	1.1	NA	NA	NA	NA	NA
GENE.evgtrinLocDN41973c0g1t14~~evgtrinLocDN41973c0g1t14.p1	6.23261	2.006	0.00189003	0.0217714	evgtrinLocDN41973c0g1t14.p1	pyrroline-5-carboxylate reductase [Gammaproteobacteria bacterium]	3	NA	NA	NA	NA	NA
GENE.evgHyS_ScswcV5_2556.g10560.t1~~evgHyS_ScswcV5_2556.g10560.t1.p1	2.15414	0.693323	0.00189013	0.0217714	evgHyS_ScswcV5_2556.g10560.t1.p1	dynein heavy chain 6, axonemal-like [Stylophora pistillata]	0	Dynein axonemal heavy chain 6	DNAH6	microtubule motor activity	cilium-dependent cell motility	axonemal dynein complex
GENE.evgMSTRG.90583.1~~evgMSTRG.90583.1.p1	7.22172	2.32458	0.00189206	0.0217804	evgMSTRG.90583.1.p1	Tachykinin-like peptides receptor 86C [Camponotus floridanus]	0.005	NA	NA	NA	NA	NA
GENE.evgtrinLocDN41999c0g1t7~~evgtrinLocDN41999c0g1t7.p1	4.93563	1.58947	0.0019015	0.0218626	evgtrinLocDN41999c0g1t7.p1	PREDICTED: uncharacterized protein LOC101239129 [Hydra vulgaris]	6.69e-42	NA	NA	NA	NA	NA
GENE.evgtrinLocDN81138c0g1t9~~evgtrinLocDN81138c0g1t9.p3	6.72619	2.16934	0.00193146	0.0221137	evgtrinLocDN81138c0g1t9.p3	PREDICTED: uncharacterized protein LOC105445158 [Strongylocentrotus purpuratus]	1.64e-06	NA	NA	NA	NA	NA
GENE.evgHyS_ScswcV5_1219.g4548.t1~~evgHyS_ScswcV5_1219.g4548.t1.p1	2.52228	0.814582	0.00195881	0.022373	evgHyS_ScswcV5_1219.g4548.t1.p1	PREDICTED: telomerase protein component 1-like [Hydra vulgaris]	0	Telomerase protein component 1	NA	RNA binding	NA	NA
GENE.evgtrinLocDN1284c1g1t1~~evgtrinLocDN1284c1g1t1.p1	2.0494	0.662324	0.0019731	0.0224823	evgtrinLocDN1284c1g1t1.p1	PREDICTED: 1-phosphatidylinositol 4,5-bisphosphate phosphodiesterase classes I and II-like [Hydra vulgaris]	0	1-phosphatidylinositol 4,5-bisphosphate phosphodiesterase	NA	phosphatidylinositol phospholipase C activity	lipid catabolic process	cell
GENE.evgtrinLocDN2180c0g1t9~~evgtrinLocDN2180c0g1t9.p1	2.0481	0.66213	0.00198008	0.0225439	evgtrinLocDN2180c0g1t9.p1	PREDICTED: uncharacterized protein LOC105847614 isoform X1 [Hydra vulgaris]	1.17e-42	NA	NA	NA	NA	NA
GENE.evgMSTRG.17556.1~~evgMSTRG.17556.1.p1	3.40746	1.10179	0.00198372	0.0225627	NA	NA	NA	NA	NA	NA	NA	NA
GENE.evgMSTRG.97815.6~~evgMSTRG.97815.6.p1	2.41924	0.78271	0.00199586	0.0226738	evgMSTRG.97815.6.p1	PREDICTED: synaptotagmin-16-like isoform X1 [Hydra vulgaris]	0	Synaptotagmin-16	NA	structural constituent of nuclear pore	exocytosis	integral component of membrane
GENE.evgtrinLocDN130c0g1t6~~evgtrinLocDN130c0g1t6.p1	3.96585	1.28363	0.0020046	0.0227459	evgtrinLocDN130c0g1t6.p1	chymotrypsin-like protease 1 [Nemopilema nomurai]	7.7e-42	LOW QUALITY PROTEIN: coagulation factor XII	NA	serine-type endopeptidase activity	proteolysis	extracellular region
GENE.evgtrinLocDN34768c0g1t2~~evgtrinLocDN34768c0g1t2.p1	5.54865	1.79686	0.0020153	0.0228401	evgtrinLocDN34768c0g1t2.p1	hypothetical protein AWC38_SpisGene23823 [Stylophora pistillata]	0.002	NA	NA	NA	NA	NA
GENE.evgtrinLocDN27614c0g1t1~~evgtrinLocDN27614c0g1t1.p1	5.94142	1.92472	0.00202256	0.0228973	NA	NA	NA	NA	NA	NA	NA	NA
GENE.evgtrinLocDN4663c1g1t3~~evgtrinLocDN4663c1g1t3.p1	7.17443	2.32417	0.00202276	0.0228973	NA	NA	NA	NA	NA	NA	NA	NA
GENE.evgtrinLocDN17530c0g1t20~~evgtrinLocDN17530c0g1t20.p1	4.5914	1.49117	0.0020765	0.023436	evgtrinLocDN17530c0g1t20.p1	PREDICTED: uncharacterized protein LOC580961 [Strongylocentrotus purpuratus]	1.47e-08	NA	NA	NA	NA	NA
GENE.evgMSTRG.61113.1~~evgMSTRG.61113.1.p1	5.28791	1.71783	0.0020822	0.0234725	evgMSTRG.61113.1.p1	predicted protein [Nematostella vectensis]	1.13e-137	NA	NA	NA	NA	NA
GENE.evgHyS_ScswcV5_66.g663.t1~~evgHyS_ScswcV5_66.g663.t1.p1	2.49268	0.809953	0.00208701	0.0235128	evgHyS_ScswcV5_66.g663.t1.p1	atrial natriuretic peptide receptor 1-like isoform X1 [Pocillopora damicornis]	0	Guanylate cyclase	NA	guanylate cyclase activity	cGMP biosynthetic process	integral component of membrane
GENE.evgHyS_ScswcV5_644.g2398.t1~~evgHyS_ScswcV5_644.g2398.t1.p1	6.79565	2.2091	0.00209653	0.0235782	evgHyS_ScswcV5_644.g2398.t1.p1	PREDICTED: potassium voltage-gated channel subfamily KQT member 1-like [Hydra vulgaris]	1.31e-70	Potassium voltage-gated channel subfamily KQT member	NA	voltage-gated potassium channel activity	potassium ion transmembrane transport	voltage-gated potassium channel complex
GENE.evgMSTRG.3878.1~~evgMSTRG.3878.1.p1	5.96886	1.94071	0.00210076	0.0236118	evgMSTRG.3878.1.p1	hypothetical protein DMN91_004056 [Ooceraea biroi]	1.52e-136	Zinc finger protein 771	NA	zinc ion binding	DNA biosynthetic process	NA
GENE.evgtrinLocDN41181c1g3t6~~evgtrinLocDN41181c1g3t6.p1	7.13888	2.32154	0.0021046	0.023641	evgtrinLocDN41181c1g3t6.p1	PREDICTED: uncharacterized protein LOC105845569, partial [Hydra vulgaris]	5.28e-15	NA	NA	NA	NA	NA
GENE.evgtrinLocDN1712c0g1t1~~evgtrinLocDN1712c0g1t1.p1	5.48955	1.7881	0.00214024	0.0239848	evgtrinLocDN1712c0g1t1.p1	hypothetical protein VR65_04180 [Desulfobulbaceae bacterium BRH_c16a]	2.3	NA	NA	NA	NA	NA
GENE.evgHyS_ScswcV5_1951.g7978.t1~~evgHyS_ScswcV5_1951.g7978.t1.p1	7.01521	2.28807	0.00216945	0.0242426	evgHyS_ScswcV5_1951.g7978.t1.p1	uncharacterized protein LOC113671524 [Pocillopora damicornis]	3.71e-42	Hexosyltransferase	NA	UDP-galactosyltransferase activity	protein glycosylation	Golgi membrane
GENE.evgtrinLocDN65194c0g1t4~~evgtrinLocDN65194c0g1t4.p1	7.81669	2.55086	0.00218152	0.0243613	evgtrinLocDN65194c0g1t4.p1	conserved hypothetical protein [Ixodes scapularis]	1.48e-20	NA	NA	NA	NA	NA
GENE.evgtrinLocDN489c0g1t10~~evgtrinLocDN489c0g1t10.p1	7.54569	2.46266	0.00218369	0.0243713	evgtrinLocDN489c0g1t10.p1	uncharacterized protein LOC110849074 [Folsomia candida]	2.16e-13	NA	NA	NA	NA	NA
GENE.evgtrinLocDN618c0g1t11~~evgtrinLocDN618c0g1t11.p1	1.90034	0.620354	0.00218899	0.0244162	evgtrinLocDN618c0g1t11.p1	homeobox transcription factor Orthopedia [Clytia hemisphaerica]	9.9e-20	NA	NA	NA	NA	NA
GENE.evgHyS_ScswcV5_3964.g17775.t1~~evgHyS_ScswcV5_3964.g17775.t1.p1	2.5761	0.842203	0.00222252	0.0247441	evgHyS_ScswcV5_3964.g17775.t1.p1	PREDICTED: beta-adrenergic receptor kinase 2-like [Hydra vulgaris]	0	G protein-coupled receptor kinase	NA	G protein-coupled receptor kinase activity	protein phosphorylation	dendrite terminus
GENE.evgHyS_ScswcV5_1748.g6361.t1~~evgHyS_ScswcV5_1748.g6361.t1.p1	4.51262	1.47613	0.00223522	0.024859	evgHyS_ScswcV5_1748.g6361.t1.p1	uncharacterized protein LOC113669629 [Pocillopora damicornis]	6.35e-48	NA	NA	NA	NA	NA
GENE.evgMSTRG.86216.2~~evgMSTRG.86216.2.p1	2.8823	0.943454	0.00225021	0.0249819	evgMSTRG.86216.2.p1	NF-kappa-B inhibitor alpha-like [Stylophora pistillata]	3.21e-41	NA	NA	NA	NA	NA
GENE.evgMSTRG.25805.1~~evgMSTRG.25805.1.p1	5.17692	1.69484	0.00225415	0.0250043	evgMSTRG.25805.1.p1	RNA-directed DNA polymerase from mobile element jockey [Stylophora pistillata]	1.3e-18	Rna-directed dna polymerase from mobile element jockey-like	NA	RNA-directed DNA polymerase activity	RNA-dependent DNA biosynthetic process	transcriptional repressor complex
GENE.evgMSTRG.121248.1~~evgMSTRG.121248.1.p1	5.78866	1.89517	0.00225485	0.0250043	evgMSTRG.121248.1.p1	BRO-D [Chrysodeixis chalcites nucleopolyhedrovirus]	4.29e-05	NA	NA	NA	NA	NA
GENE.evgMSTRG.36254.1~~evgMSTRG.36254.1.p1	2.33711	0.766387	0.00229212	0.0253585	evgMSTRG.36254.1.p1	PREDICTED: alsin-like [Hydra vulgaris]	0	Amyotrophic lateral sclerosis 2 (Juvenile)	ALS2	Rho guanyl-nucleotide exchange factor activity	regulation of Rho protein signal transduction	dendritic spine
GENE.evgMSTRG.95720.1~~evgMSTRG.95720.1.p1	7.58147	2.49164	0.00234418	0.0257549	evgMSTRG.95720.1.p1	peptide chain release factor 2 [Cellulomonas sp. NEAU-YY56]	1.6	NA	NA	NA	NA	NA
GENE.evgHyS_ScswcV5_3470.g14483.t1~~evgHyS_ScswcV5_3470.g14483.t1.p1	6.35417	2.08882	0.00235024	0.0258066	evgHyS_ScswcV5_3470.g14483.t1.p1	PREDICTED: ubiA prenyltransferase domain-containing protein 1 [Callorhinchus milii]	1.17e-87	UbiA prenyltransferase domain-containing protein 1	UBIAD1	prenyltransferase activity	vitamin K biosynthetic process	integral component of Golgi membrane
GENE.evgtrinLocDN1074c0g1t14~~evgtrinLocDN1074c0g1t14.p1	3.7956	1.24872	0.00236896	0.0259821	evgtrinLocDN1074c0g1t14.p1	PREDICTED: anoctamin-7-like isoform X1 [Hydra vulgaris]	0	Anoctamin	NA	protein dimerization activity	calcium activated phospholipid scrambling	integral component of membrane
GENE.evgHyS_ScswcV5_1336.g5042.t1~~evgHyS_ScswcV5_1336.g5042.t1.p1	5.7102	1.87946	0.00237981	0.0260711	evgHyS_ScswcV5_1336.g5042.t1.p1	PREDICTED: protein boule-like [Hydra vulgaris]	2.57e-38	RNA-binding protein 38	NA	mRNA binding	germ cell development	perikaryon
GENE.evgHyS_ScswcV5_3470.g14693.t1~~evgHyS_ScswcV5_3470.g14693.t1.p1	1.97748	0.651415	0.00240006	0.0262628	evgHyS_ScswcV5_3470.g14693.t1.p1	ectopic P granules protein 5 homolog [Stylophora pistillata]	0	NA	NA	NA	NA	NA
GENE.evgMSTRG.116487.2~~evgMSTRG.116487.2.p1	1.92843	0.636375	0.00244285	0.0266697	evgMSTRG.116487.2.p1	PREDICTED: uncharacterized protein LOC100211324 [Hydra vulgaris]	0	NA	NA	NA	NA	NA
GENE.evgtrinLocDN23711c0g1t5~~evgtrinLocDN23711c0g1t5.p1	8.12813	2.68285	0.00244825	0.0267067	evgtrinLocDN23711c0g1t5.p1	hypothetical protein DOTSEDRAFT_31863 [Dothistroma septosporum NZE10]	2.9	NA	NA	NA	NA	NA
GENE.evgtrinLocDN7579c0g1t5~~evgtrinLocDN7579c0g1t5.p1	3.1016	1.02378	0.00244905	0.0267067	NA	NA	NA	NA	NA	NA	NA	NA
GENE.evgtrinLocDN86200c0g1t3~~evgtrinLocDN86200c0g1t3.p1	5.1114	1.68995	0.00248973	0.0270573	evgtrinLocDN86200c0g1t3.p1	murein biosynthesis integral membrane protein MurJ [Clostridium sp. DL-VIII]	9	NA	NA	NA	NA	NA
GENE.evgHyS_ScswcV5_2090.g8170.t1~~evgHyS_ScswcV5_2090.g8170.t1.p1	2.23396	0.739129	0.00250764	0.0271899	evgHyS_ScswcV5_2090.g8170.t1.p1	PREDICTED: uncharacterized protein LOC101240655 [Hydra vulgaris]	1.5e-52	NA	NA	NA	NA	NA
GENE.evgMSTRG.63894.1~~evgMSTRG.63894.1.p1	2.78448	0.921585	0.00251609	0.027235	evgMSTRG.63894.1.p1	hypothetical protein AV955_gp004 [Diadromus pulchellus ascovirus 4a]	4.1e-05	NA	NA	NA	NA	NA
GENE.evgtrinLocDN21858c0g1t10~~evgtrinLocDN21858c0g1t10.p1	4.53575	1.50287	0.00254408	0.0274444	evgtrinLocDN21858c0g1t10.p1	PREDICTED: uncharacterized protein LOC100199667 [Hydra vulgaris]	8.01e-43	NA	NA	NA	NA	NA
GENE.evgtrinLocDN8238c0g2t9~~evgtrinLocDN8238c0g2t9.p1	3.29122	1.09176	0.00257315	0.0277108	evgtrinLocDN8238c0g2t9.p1	PREDICTED: trace amine-associated receptor 7d-like [Hydra vulgaris]	2.46e-20	NA	NA	NA	NA	NA
GENE.evgMSTRG.113459.1~~evgMSTRG.113459.1.p1	3.04127	1.00931	0.00258481	0.0278207	evgMSTRG.113459.1.p1	hypothetical protein EGW08_017577 [Elysia chlorotica]	1.24e-13	Retrovirus-related Pol poly from transposon (Fragment)	NA	aspartic-type endopeptidase activity	DNA integration	integral component of membrane
GENE.evgHyS_ScswcV5_66.g491.t1~~evgHyS_ScswcV5_66.g491.t1.p1	3.75929	1.24801	0.00259328	0.0278961	evgHyS_ScswcV5_66.g491.t1.p1	PREDICTED: kelch-like protein 2 [Hydra vulgaris]	0	Kelch like family member 2	KLHL2	actin binding	protein ubiquitination	Cul3-RING ubiquitin ligase complex
GENE.evgHyS_ScswcV5_644.g2097.t1~~evgHyS_ScswcV5_644.g2097.t1.p1	4.05497	1.3466	0.00260168	0.0279707	NA	NA	NA	NA	NA	NA	NA	NA
GENE.evgHyS_ScswcV5_3781.g16332.t1~~evgHyS_ScswcV5_3781.g16332.t1.p1	2.88035	0.957016	0.00261489	0.0280651	evgHyS_ScswcV5_3781.g16332.t1.p1	PREDICTED: N-terminal kinase-like protein isoform X2 [Hydra vulgaris]	0	N-terminal kinase-like protein isoform A	SCYL1	protein kinase activity	protein phosphorylation	endoplasmic reticulum-Golgi intermediate compartment
GENE.evgtrinLocDN61333c0g1t4~~evgtrinLocDN61333c0g1t4.p1	6.80762	2.26204	0.00261677	0.0280695	evgtrinLocDN61333c0g1t4.p1	uncharacterized protein LOC111042323, partial [Myzus persicae]	3.16e-14	NA	NA	NA	NA	NA
GENE.evgMSTRG.51945.2~~evgMSTRG.51945.2.p1	1.92253	0.639558	0.0026468	0.0283119	evgMSTRG.51945.2.p1	PREDICTED: DNA polymerase zeta catalytic subunit-like [Hydra vulgaris]	0	DNA polymerase zeta catalytic subunit	REV3L	DNA-directed DNA polymerase activity	translesion synthesis	zeta DNA polymerase complex
GENE.evgMSTRG.106061.1~~evgMSTRG.106061.1.p1	5.00433	1.66563	0.00266049	0.0284104	evgMSTRG.106061.1.p1	transposase IS66 family protein [Escherichia coli 2875000]	5.1	NA	NA	NA	NA	NA
GENE.evgHyS_ScswcV5_4378.g20735.t1~~evgHyS_ScswcV5_4378.g20735.t1.p1	4.04868	1.34784	0.00266607	0.0284541	evgHyS_ScswcV5_4378.g20735.t1.p1	PREDICTED: probable E3 ubiquitin-protein ligase makorin-1 [Hydra vulgaris]	1.73e-140	zinc finger CCCH domain-containing protein 69	NA	metal ion binding	protein ubiquitination	nucleus
GENE.evgMSTRG.69827.1~~evgMSTRG.69827.1.p1	3.78944	1.26233	0.0026826	0.0285702	evgMSTRG.69827.1.p1	MULTISPECIES: termination factor Rho [Pseudomonas]	0.57	NA	NA	NA	NA	NA
GENE.evgtrinLocDN30416c0g1t1~~evgtrinLocDN30416c0g1t1.p1	7.54082	2.51373	0.00270112	0.0287154	evgtrinLocDN30416c0g1t1.p1	hypothetical protein YYC_04946 [Plasmodium yoelii 17X]	0.36	NA	NA	NA	NA	NA
GENE.evgHyS_ScswcV5_1734.g5872.t1~~evgHyS_ScswcV5_1734.g5872.t1.p1	2.32318	0.775153	0.00272593	0.0289468	evgHyS_ScswcV5_1734.g5872.t1.p1	PREDICTED: brefeldin A-inhibited guanine nucleotide-exchange protein 1-like [Hydra vulgaris]	0	ADP ribosylation factor guanine nucleotide exchange factor 1	ARFGEF1	ARF guanyl-nucleotide exchange factor activity	regulation of ARF protein signal transduction	perinuclear region of cytoplasm
GENE.evgtrinLocDN22188c0g1t9~~evgtrinLocDN22188c0g1t9.p1	5.75886	1.92274	0.00274329	0.0291149	evgtrinLocDN22188c0g1t9.p1	kynureninase [Nocardia pseudobrasiliensis]	1.3	NA	NA	NA	NA	NA
GENE.evgHyS_ScswcV5_66.g550.t1~~evgHyS_ScswcV5_66.g550.t1.p1	2.53556	0.846699	0.00274762	0.0291284	evgHyS_ScswcV5_66.g550.t1.p1	ABC transporter permease [Agrococcus casei]	8.4	NA	NA	NA	NA	NA
GENE.evgtrinLocDN46258c0g1t4~~evgtrinLocDN46258c0g1t4.p1	4.53197	1.51561	0.00278806	0.0294915	NA	NA	NA	NA	NA	NA	NA	NA
GENE.evgtrinLocDN3448c0g1t1~~evgtrinLocDN3448c0g1t1.p1	3.80813	1.2739	0.00279563	0.0295551	evgtrinLocDN3448c0g1t1.p1	hypothetical protein AWC38_SpisGene25070, partial [Stylophora pistillata]	0.049	NA	NA	NA	NA	NA
GENE.evgMSTRG.38792.1~~evgMSTRG.38792.1.p1	4.77392	1.59756	0.00280575	0.0296457	evgMSTRG.38792.1.p1	C007-H6 G-protein coupled receptor [Acropora millepora]	1.69e-73	Putative 5-hydroxytryptamine receptor 4-like	NA	G protein-coupled receptor activity	G protein-coupled receptor signaling pathway	integral component of plasma membrane
GENE.evgtrinLocDN30385c0g1t19~~evgtrinLocDN30385c0g1t19.p1	5.62228	1.88172	0.0028096	0.0296698	evgtrinLocDN30385c0g1t19.p1	sensor histidine kinase [Psychroserpens sp. Hel_I_66]	2.6	NA	NA	NA	NA	NA
GENE.evgMSTRG.87932.1~~evgMSTRG.87932.1.p1	3.99101	1.33813	0.00285887	0.0300402	evgMSTRG.87932.1.p1	uncharacterized protein LOC107444937 [Parasteatoda tepidariorum]	9.35e-75	Gastrula zinc finger protein xlcgf46.1: PROVISIONAL	NA	zinc ion binding	NA	NA
GENE.evgMSTRG.132318.1~~evgMSTRG.132318.1.p1	2.78829	0.935318	0.00287207	0.0301455	evgMSTRG.132318.1.p1	hypothetical protein C8259_34685, partial [Nocardia nova]	3.81e-06	NA	NA	NA	NA	NA
GENE.evgHyS_ScswcV5_644.g2020.t1~~evgHyS_ScswcV5_644.g2020.t1.p1	3.16189	1.0613	0.00288955	0.0302957	evgHyS_ScswcV5_644.g2020.t1.p1	PREDICTED: dnaJ homolog subfamily C member 22-like [Hydra vulgaris]	3.16e-134	DnaJ like protein subfamily C member 22	NA	unfolded protein binding	protein folding	integral component of membrane
GENE.evgMSTRG.17024.2~~evgMSTRG.17024.2.p1	2.34819	0.788781	0.00291103	0.0304874	evgMSTRG.17024.2.p1	paired-like homeodomain protein [Clytia hemisphaerica]	4.86e-64	Aristaless homeodomain transcription factor	NA	sequence-specific DNA binding	regulation of transcription, DNA-templated	nucleus
GENE.evgHyS_ScswcV5_3978.g17863.t1~~evgHyS_ScswcV5_3978.g17863.t1.p1	3.74501	1.25838	0.00291986	0.030563	evgHyS_ScswcV5_3978.g17863.t1.p1	atrial natriuretic peptide receptor 1-like [Orbicella faveolata]	0	Guanylate cyclase	NA	guanylate cyclase activity	cGMP biosynthetic process	integral component of membrane
GENE.evgtrinLocDN150245c1g1t3~~evgtrinLocDN150245c1g1t3.p1	5.71705	1.92303	0.00294962	0.0307182	evgtrinLocDN150245c1g1t3.p1	hypothetical protein pdam_00025616 [Pocillopora damicornis]	2.26e-09	NA	NA	NA	NA	NA
GENE.evgHyS_ScswcV5_1325.g4922.t1~~evgHyS_ScswcV5_1325.g4922.t1.p1	3.87323	1.30284	0.00294981	0.0307182	evgHyS_ScswcV5_1325.g4922.t1.p1	PREDICTED: filamin-C-like [Hydra vulgaris]	0	NA	NA	NA	NA	NA
GENE.evgHyS_ScswcV5_3062.g12086.t1~~evgHyS_ScswcV5_3062.g12086.t1.p1	2.21769	0.746095	0.00295482	0.0307431	evgHyS_ScswcV5_3062.g12086.t1.p1	PREDICTED: potassium channel subfamily K member 4-like [Acropora digitifera]	3.43e-51	Potassium channel subfamily K member 16	NA	potassium channel activity	potassium ion transmembrane transport	integral component of membrane
GENE.evgtrinLocDN53985c0g1t4~~evgtrinLocDN53985c0g1t4.p1	5.20772	1.75276	0.00296686	0.0308347	evgtrinLocDN53985c0g1t4.p1	hypothetical protein [Burkholderia pseudomallei]	0.006	NA	NA	NA	NA	NA
GENE.evgMSTRG.73905.1~~evgMSTRG.73905.1.p1	3.012	1.01399	0.00297371	0.0308889	evgMSTRG.73905.1.p1	uncharacterized protein LOC111319323 [Stylophora pistillata]	2.83e-40	Pao retrotransposon peptidase domain-containing protein (Fragment)	NA	nucleic acid binding	DNA integration	integral component of membrane
GENE.evgtrinLocDN155664c0g1t3~~evgtrinLocDN155664c0g1t3.p1	7.6665	2.5829	0.00299574	0.0310285	evgtrinLocDN155664c0g1t3.p1	hypothetical protein CNBG_5144, partial [Cryptococcus gattii VGII R265]	0.42	NA	NA	NA	NA	NA
GENE.evgHyS_ScswcV5_364.g1258.t1~~evgHyS_ScswcV5_364.g1258.t1.p1	7.78177	2.62183	0.0029968	0.0310285	evgHyS_ScswcV5_364.g1258.t1.p1	PREDICTED: lipid phosphate phosphohydrolase 1-like [Hydra vulgaris]	2.99e-39	NA	NA	NA	NA	NA
GENE.evgMSTRG.40225.1~~evgMSTRG.40225.1.p1	5.11729	1.7259	0.00302689	0.0312369	evgMSTRG.40225.1.p1	hypothetical protein LCMAC101_05750 [Marseillevirus LCMAC101]	5.69e-37	NA	NA	NA	NA	NA
GENE.evgtrinLocDN8363c2g1t8~~evgtrinLocDN8363c2g1t8.p1	4.25137	1.43554	0.00306131	0.0315407	evgtrinLocDN8363c2g1t8.p1	hypothetical protein OJAV_G00235410 [Oryzias javanicus]	9.96e-66	Retrovirus-related Pol polyprotein from transposon 17.6	NA	nucleic acid binding	DNA integration	nucleus
GENE.evgtrinLocDN10544c0g1t18~~evgtrinLocDN10544c0g1t18.p1	2.83828	0.958777	0.0030733	0.0316472	evgtrinLocDN10544c0g1t18.p1	PREDICTED: lysine histidine transporter-like 4 [Hydra vulgaris]	7.01e-142	Proton-coupled amino acid transporter 4	NA	NA	NA	integral component of membrane
GENE.evgtrinLocDN3089c0g2t8~~evgtrinLocDN3089c0g2t8.p1	4.53546	1.53231	0.00307756	0.0316739	evgtrinLocDN3089c0g2t8.p1	uncharacterized protein LOC111085920 [Limulus polyphemus]	6.04e-09	NA	NA	NA	NA	NA
GENE.evgtrinLocDN21601c0g1t15~~evgtrinLocDN21601c0g1t15.p1	2.24135	0.757304	0.00308	0.031682	evgtrinLocDN21601c0g1t15.p1	PREDICTED: myb-like protein D [Hydra vulgaris]	2.96e-07	NA	NA	NA	NA	NA
GENE.evgMSTRG.72907.10~~evgMSTRG.72907.10.p1	3.29193	1.11387	0.00312263	0.031965	NA	NA	NA	NA	NA	NA	NA	NA
GENE.evgHyS_ScswcV5_3204.g12862.t1~~evgHyS_ScswcV5_3204.g12862.t1.p1	3.61626	1.2238	0.00312734	0.0319939	evgHyS_ScswcV5_3204.g12862.t1.p1	PREDICTED: adhesion G-protein coupled receptor D1-like [Acropora digitifera]	1.76e-29	NA	NA	NA	NA	NA
GENE.evgtrinLocDN59175c0g1t15~~evgtrinLocDN59175c0g1t15.p1	6.65404	2.25238	0.00313447	0.0320345	evgtrinLocDN59175c0g1t15.p1	biogenic amine-like GPCR [Tripedalia cystophora]	5.9e-11	NA	NA	NA	NA	NA
GENE.evgtrinLocDN8500c0g1t16~~evgtrinLocDN8500c0g1t16.p1	3.58622	1.21498	0.00316056	0.0322665	evgtrinLocDN8500c0g1t16.p1	dual specificity protein phosphatase 22 isoform X1 [Pseudonaja textilis]	4.44e-30	Dual specificity phosphatase 22a	DUSP22A	protein tyrosine/serine/threonine phosphatase activity	protein dephosphorylation	cytosol
GENE.evgMSTRG.101719.1~~evgMSTRG.101719.1.p1	2.25099	0.76479	0.00324754	0.0330277	evgMSTRG.101719.1.p1	PREDICTED: exonuclease mut-7 homolog isoform X3 [Hydra vulgaris]	0	Exonuclease 3'-5' domain containing 3	EXD3	3'-5' exonuclease activity	nucleic acid phosphodiester bond hydrolysis	ciliary basal body
GENE.evgMSTRG.20659.1~~evgMSTRG.20659.1.p1	4.81413	1.63589	0.0032523	0.0330437	NA	NA	NA	NA	NA	NA	NA	NA
GENE.evgtrinLocDN76446c0g1t4~~evgtrinLocDN76446c0g1t4.p1	6.97363	2.36988	0.00325459	0.0330493	evgtrinLocDN76446c0g1t4.p1	hypothetical protein ASPWEDRAFT_24112 [Aspergillus wentii DTO 134E9]	0.7	NA	NA	NA	NA	NA
GENE.evgHyS_ScswcV5_3309.g13885.t1~~evgHyS_ScswcV5_3309.g13885.t1.p1	2.2117	0.752242	0.00328065	0.0332961	evgHyS_ScswcV5_3309.g13885.t1.p1	PREDICTED: angiogenic factor with G patch and FHA domains 1-like isoform X2 [Hydra vulgaris]	9.89e-148	Angiogenic factor with G patch and FHA domains 1	NA	nucleic acid binding	positive regulation of angiogenesis	preribosome, small subunit precursor
GENE.evgHyS_ScswcV5_4270.g19915.t1~~evgHyS_ScswcV5_4270.g19915.t1.p1	2.82673	0.961689	0.0032891	0.0333641	evgHyS_ScswcV5_4270.g19915.t1.p1	PREDICTED: intraflagellar transport protein 81 homolog [Hydra vulgaris]	0	Intraflagellar transport protein 81	IFT81	tubulin binding	intraciliary transport	intraciliary transport particle B
GENE.evgMSTRG.135370.1~~evgMSTRG.135370.1.p1	3.22592	1.09839	0.00331447	0.0335678	evgMSTRG.135370.1.p1	uncharacterized protein LOC111117557 isoform X2 [Crassostrea virginica]	0.001	NA	NA	NA	NA	NA
GENE.evgMSTRG.72785.1~~evgMSTRG.72785.1.p1	2.43887	0.830545	0.00331972	0.0335911	evgMSTRG.72785.1.p1	hypothetical protein AC249_AIPGENE26930 [Exaiptasia pallida]	1.85e-24	NA	NA	NA	NA	NA
GENE.evgHyS_ScswcV5_2333.g8521.t1~~evgHyS_ScswcV5_2333.g8521.t1.p1	2.03279	0.69264	0.00333713	0.0337083	evgHyS_ScswcV5_2333.g8521.t1.p1	ras-specific guanine nucleotide-releasing factor 1-like [Exaiptasia pallida]	0	ras-specific guanine nucleotide-releasing factor 1	NA	Rho guanyl-nucleotide exchange factor activity	regulation of Rho protein signal transduction	growth cone
GENE.evgtrinLocDN6362c0g1t7~~evgtrinLocDN6362c0g1t7.p1	6.09567	2.077	0.00333719	0.0337083	evgtrinLocDN6362c0g1t7.p1	predicted protein [Nematostella vectensis]	3.23e-21	NA	NA	NA	NA	NA
GENE.evgHyS_ScswcV5_4475.g21355.t1~~evgHyS_ScswcV5_4475.g21355.t1.p1	4.38751	1.49637	0.00336682	0.0339463	evgHyS_ScswcV5_4475.g21355.t1.p1	uncharacterized protein LOC110255103, partial [Exaiptasia pallida]	1.7e-10	NA	NA	NA	NA	NA
GENE.evgtrinLocDN19978c0g1t1~~evgtrinLocDN19978c0g1t1.p2	6.72864	2.29509	0.0033705	0.0339463	evgtrinLocDN19978c0g1t1.p2	PREDICTED: uncharacterized protein LOC108669458 isoform X7 [Hyalella azteca]	0.28	NA	NA	NA	NA	NA
GENE.evgtrinLocDN1936c0g2t4~~evgtrinLocDN1936c0g2t4.p1	5.22392	1.78189	0.00337146	0.0339463	NA	NA	NA	NA	NA	NA	NA	NA
GENE.evgMSTRG.8533.3~~evgMSTRG.8533.3.p1	4.0198	1.37136	0.00337607	0.0339748	evgMSTRG.8533.3.p1	N-acetyltransferase [Desulfospira joergensenii]	4.2	NA	NA	NA	NA	NA
GENE.evgtrinLocDN37160c0g2t6~~evgtrinLocDN37160c0g2t6.p1	6.9381	2.36971	0.00341338	0.0342959	evgtrinLocDN37160c0g2t6.p1	hypothetical protein X777_16036 [Ooceraea biroi]	0.009	NA	NA	NA	NA	NA
GENE.evgtrinLocDN40670c0g1t6~~evgtrinLocDN40670c0g1t6.p1	7.03035	2.40187	0.00342216	0.034366	evgtrinLocDN40670c0g1t6.p1	uncharacterized protein LOC111116666 [Crassostrea virginica]	1.6e-13	NA	NA	NA	NA	NA
GENE.evgHyS_ScswcV5_98.g826.t1~~evgHyS_ScswcV5_98.g826.t1.p1	2.60239	0.890497	0.0034734	0.0347888	evgHyS_ScswcV5_98.g826.t1.p1	uncharacterized protein LOC111321936 isoform X2 [Stylophora pistillata]	1.67e-40	Amino acid ABC transporter substrate-binding protein, PAAT family	NA	voltage-gated potassium channel activity	potassium ion transmembrane transport	voltage-gated potassium channel complex
GENE.evgMSTRG.112187.1~~evgMSTRG.112187.1.p1	4.34436	1.48726	0.00348855	0.0349038	evgMSTRG.112187.1.p1	hypothetical protein CAPTEDRAFT_213860 [Capitella teleta]	5.19e-27	NA	NA	NA	NA	NA
GENE.evgHyS_ScswcV5_3186.g12615.t1~~evgHyS_ScswcV5_3186.g12615.t1.p1	1.96989	0.674643	0.00350139	0.0349772	evgHyS_ScswcV5_3186.g12615.t1.p1	predicted protein [Nematostella vectensis]	7.02e-151	Tyrosine kinase non receptor 2	TNK2	protein tyrosine kinase activity	peptidyl-tyrosine phosphorylation	Grb2-EGFR complex
GENE.evgMSTRG.28331.1~~evgMSTRG.28331.1.p1	4.71519	1.6155	0.00351466	0.0350913	NA	NA	NA	NA	NA	NA	NA	NA
GENE.evgHyS_ScswcV5_3896.g16974.t1~~evgHyS_ScswcV5_3896.g16974.t1.p1	3.07996	1.05648	0.00355355	0.0354031	evgHyS_ScswcV5_3896.g16974.t1.p1	hypothetical protein CVT24_010333 [Panaeolus cyanescens]	5.8	NA	NA	NA	NA	NA
GENE.evgHyS_ScswcV5_324.g1179.t1~~evgHyS_ScswcV5_324.g1179.t1.p1	5.39524	1.851	0.00355962	0.0354031	evgHyS_ScswcV5_324.g1179.t1.p1	PREDICTED: dual specificity mitogen-activated protein kinase kinase 4-like [Hydra vulgaris]	0	Dual specificity mitogen-activated protein kinase kinase 4	NA	protein serine/threonine kinase activity	protein phosphorylation	axon
GENE.evgHyS_ScswcV5_3081.g12151.t1~~evgHyS_ScswcV5_3081.g12151.t1.p1	6.58233	2.25842	0.0035618	0.0354031	evgHyS_ScswcV5_3081.g12151.t1.p1	PREDICTED: tyrosine aminotransferase-like [Hydra vulgaris]	0	tyrosine aminotransferase	TAT	L-tyrosine aminotransferase activity	aromatic amino acid family metabolic process	mitochondrion
GENE.evgtrinLocDN45820c0g1t7~~evgtrinLocDN45820c0g1t7.p1	5.12891	1.76143	0.00359358	0.0356549	evgtrinLocDN45820c0g1t7.p1	PREDICTED: uncharacterized protein LOC102808314 [Saccoglossus kowalevskii]	1.18e-20	NA	NA	NA	NA	NA
GENE.evgtrinLocDN118790c0g1t7~~evgtrinLocDN118790c0g1t7.p1	7.3661	2.53025	0.00360021	0.0356835	evgtrinLocDN118790c0g1t7.p1	ras-related protein Rac1 [Frankliniella occidentalis]	3.79e-44	Small GTP-binding protein domain	NA	GTPase activity	small GTPase mediated signal transduction	cell projection
GENE.evgMSTRG.129627.3~~evgMSTRG.129627.3.p2	4.15796	1.42853	0.00360669	0.0357291	NA	NA	NA	NA	NA	NA	NA	NA
GENE.evgtrinLocDN111629c0g1t4~~evgtrinLocDN111629c0g1t4.p1	7.37074	2.53463	0.00363728	0.0359947	evgtrinLocDN111629c0g1t4.p1	ribonucleoside-diphosphate reductase subunit beta [Campylobacter gracilis]	9	NA	NA	NA	NA	NA
GENE.evgtrinLocDN35688c0g1t14~~evgtrinLocDN35688c0g1t14.p1	2.69018	0.925298	0.00364481	0.0360505	evgtrinLocDN35688c0g1t14.p1	trace amine-associated receptor 13c-like [Astatotilapia calliptera]	0.000109	NA	NA	NA	NA	NA
GENE.evgHyS_ScswcV5_2548.g9949.t1~~evgHyS_ScswcV5_2548.g9949.t1.p1	6.59526	2.27048	0.00367497	0.036282	evgHyS_ScswcV5_2548.g9949.t1.p1	PREDICTED: riboflavin kinase-like [Hydra vulgaris]	3.06e-68	Riboflavin kinase	RFK	riboflavin kinase activity	riboflavin biosynthetic process	mitochondrial inner membrane
GENE.evgtrinLocDN90045c0g1t2~~evgtrinLocDN90045c0g1t2.p1	7.21877	2.48566	0.00368234	0.0362897	evgtrinLocDN90045c0g1t2.p1	serine hydroxymethyltransferase [Blastococcus saxobsidens]	0.79	NA	NA	NA	NA	NA
GENE.evgMSTRG.140393.2~~evgMSTRG.140393.2.p1	1.98794	0.685646	0.00373916	0.0367546	evgMSTRG.140393.2.p1	PREDICTED: protein NDRG3-like [Hydra vulgaris]	7.86e-157	Misexpression suppressor of KSR	NA	NA	positive regulation of Ras protein signal transduction	cytoplasm
GENE.evgMSTRG.67735.1~~evgMSTRG.67735.1.p1	3.09937	1.07019	0.00377822	0.0369931	evgMSTRG.67735.1.p1	Adhesive plaque matrix protein [Symbiodinium microadriaticum]	4.49e-25	NA	NA	NA	NA	NA
GENE.evgMSTRG.42700.1~~evgMSTRG.42700.1.p1	2.24915	0.777124	0.00380134	0.0371929	evgMSTRG.42700.1.p1	PREDICTED: probable glutamate receptor [Hydra vulgaris]	1.11e-70	NA	NA	NA	NA	NA
GENE.evgMSTRG.40830.5~~evgMSTRG.40830.5.p1	2.36284	0.816726	0.003815	0.0373075	evgMSTRG.40830.5.p1	PREDICTED: non-POU domain-containing octamer-binding protein-like isoform X2 [Hydra vulgaris]	4.35e-145	Splicing factor proline/glutamine rich (Polypyrimidine tract binding protein associated)	SFPQ	RNA binding	midbrain-hindbrain boundary initiation	paraspeckles
GENE.evgtrinLocDN907c17g1t4~~evgtrinLocDN907c17g1t4.p1	6.07957	2.102	0.0038245	0.0373811	evgtrinLocDN907c17g1t4.p1	protein ANTAGONIST OF LIKE HETEROCHROMATIN PROTEIN 1-like [Anoplophora glabripennis]	1.94e-20	NA	NA	NA	NA	NA
GENE.evgHyS_ScswcV5_3305.g13711.t1~~evgHyS_ScswcV5_3305.g13711.t1.p1	3.39971	1.17563	0.00383007	0.0374164	evgHyS_ScswcV5_3305.g13711.t1.p1	coiled-coil domain-containing protein 136-like isoform X4 [Pocillopora damicornis]	7.64e-87	NA	NA	NA	NA	NA
GENE.evgtrinLocDN18568c0g1t14~~evgtrinLocDN18568c0g1t14.p1	6.17484	2.1368	0.00385532	0.0376437	evgtrinLocDN18568c0g1t14.p1	LIM class homeobox transcription factor Lmx [Mnemiopsis leidyi]	2.35e-16	NA	NA	NA	NA	NA
GENE.evgHyS_ScswcV5_2750.g11333.t1~~evgHyS_ScswcV5_2750.g11333.t1.p1	1.79041	0.619961	0.00387775	0.0378046	evgHyS_ScswcV5_2750.g11333.t1.p1	PREDICTED: uncharacterized protein LOC100373140 [Saccoglossus kowalevskii]	1.93e-36	NA	NA	NA	NA	NA
GENE.evgtrinLocDN11112c0g3t1~~evgtrinLocDN11112c0g3t1.p1	6.10107	2.11579	0.00393176	0.0381553	NA	NA	NA	NA	NA	NA	NA	NA
GENE.evgtrinLocDN6616c0g2t6~~evgtrinLocDN6616c0g2t6.p1	2.07564	0.720757	0.0039791	0.0385558	evgtrinLocDN6616c0g2t6.p1	PREDICTED: uncharacterized protein LOC105844737 [Hydra vulgaris]	0	Polycystic kidney disease protein 1-like protein 2-like protein (Fragment)	NA	calcium ion binding	kidney development	integral component of membrane
GENE.evgMSTRG.40249.1~~evgMSTRG.40249.1.p1	3.13898	1.09073	0.0040036	0.0387537	evgMSTRG.40249.1.p1	predicted protein [Nematostella vectensis]	0	NA	NA	NA	NA	NA
GENE.evgMSTRG.73747.1~~evgMSTRG.73747.1.p1	4.527	1.57404	0.0040269	0.0389397	NA	NA	NA	NA	NA	NA	NA	NA
GENE.evgHyS_ScswcV5_1734.g6006.t1~~evgHyS_ScswcV5_1734.g6006.t1.p1	1.98262	0.689463	0.00403265	0.0389755	evgHyS_ScswcV5_1734.g6006.t1.p1	PREDICTED: uncharacterized protein LOC101236414 [Hydra vulgaris]	1.56e-176	NA	NA	NA	NA	NA
GENE.evgHyS_ScswcV5_4270.g19951.t1~~evgHyS_ScswcV5_4270.g19951.t1.p1	2.65766	0.924295	0.00403588	0.0389869	evgHyS_ScswcV5_4270.g19951.t1.p1	glutathione reductase, mitochondrial-like [Mizuhopecten yessoensis]	0	Glutathione-disulfide reductase	NA	glutathione-disulfide reductase activity	glutathione metabolic process	cytoplasm
GENE.evgtrinLocDN2806c0g1t6~~evgtrinLocDN2806c0g1t6.p1	2.9408	1.02461	0.00410247	0.0394092	evgtrinLocDN2806c0g1t6.p1	hypothetical protein AC249_AIPGENE24995, partial [Exaiptasia pallida]	2.61e-52	RNA-directed DNA polymerase from mobile element jockey	POL	RNA-directed DNA polymerase activity	RNA-dependent DNA biosynthetic process	integral component of membrane
GENE.evgtrinLocDN20315c1g1t8~~evgtrinLocDN20315c1g1t8.p1	5.44609	1.89758	0.00410443	0.0394092	evgtrinLocDN20315c1g1t8.p1	predicted protein [Nematostella vectensis]	3.08e-23	NA	NA	NA	NA	NA
GENE.evgHyS_ScswcV5_807.g3464.t1~~evgHyS_ScswcV5_807.g3464.t1.p1	2.59494	0.905424	0.00415701	0.0397736	evgHyS_ScswcV5_807.g3464.t1.p1	uncharacterized protein LOC110233584 [Exaiptasia pallida]	4.52e-124	NA	NA	NA	NA	NA
GENE.evgMSTRG.132763.1~~evgMSTRG.132763.1.p1	4.46296	1.55787	0.00417306	0.0398931	evgMSTRG.132763.1.p1	muscle, skeletal receptor tyrosine-protein kinase [Gouania willdenowi]	1.85e-14	NA	NA	NA	NA	NA
GENE.evgHyS_ScswcV5_457.g1647.t1~~evgHyS_ScswcV5_457.g1647.t1.p1	2.21457	0.773451	0.00419338	0.0400612	evgHyS_ScswcV5_457.g1647.t1.p1	PREDICTED: uncharacterized protein LOC105312051 [Amphimedon queenslandica]	0	NA	NA	NA	NA	NA
GENE.evgMSTRG.95123.1~~evgMSTRG.95123.1.p1	4.69437	1.63975	0.00419845	0.0400895	evgMSTRG.95123.1.p1	unnamed protein product [Schistocephalus solidus]	0.014	NA	NA	NA	NA	NA
GENE.evgtrinLocDN37984c1g1t2~~evgtrinLocDN37984c1g1t2.p1	4.80507	1.67917	0.00421543	0.0401991	evgtrinLocDN37984c1g1t2.p1	PREDICTED: uncharacterized protein LOC105847536, partial [Hydra vulgaris]	0.026	NA	NA	NA	NA	NA
GENE.evgtrinLocDN18465c0g3t5~~evgtrinLocDN18465c0g3t5.p1	7.8853	2.75582	0.0042187	0.0401991	evgtrinLocDN18465c0g3t5.p1	isopeptide-forming domain-containing fimbrial protein, partial [Streptococcus oralis]	9.1	NA	NA	NA	NA	NA
GENE.evgHyS_ScswcV5_457.g1682.t1~~evgHyS_ScswcV5_457.g1682.t1.p1	2.70923	0.946881	0.00422025	0.0401991	evgHyS_ScswcV5_457.g1682.t1.p1	PREDICTED: serine/threonine-protein kinase A-Raf-like [Hydra vulgaris]	0	Serine/threonine-protein kinase B-raf	BRAF	protein serine/threonine kinase activity	protein phosphorylation	mitochondrion
GENE.evgHyS_ScswcV5_2988.g11832.t1~~evgHyS_ScswcV5_2988.g11832.t1.p1	2.18425	0.763663	0.00423337	0.0402808	evgHyS_ScswcV5_2988.g11832.t1.p1	NACHT domain- and WD repeat-containing protein 1-like [Pocillopora damicornis]	8.13e-30	NA	NA	NA	NA	NA
GENE.evgMSTRG.59903.1~~evgMSTRG.59903.1.p1	3.19285	1.11635	0.00423541	0.0402808	evgMSTRG.59903.1.p1	predicted protein [Nematostella vectensis]	4.99e-132	NA	NA	NA	NA	NA
GENE.evgHyS_ScswcV5_1823.g7466.t1~~evgHyS_ScswcV5_1823.g7466.t1.p1	2.65919	0.930004	0.00424541	0.0403356	evgHyS_ScswcV5_1823.g7466.t1.p1	PREDICTED: mitogen-activated protein kinase kinase kinase MLT-like [Hydra vulgaris]	0	Mitogen-activated protein kinase kinase kinase 20	MAP3K20	MAP kinase kinase kinase activity	activation of MAPKK activity	cytosol
GENE.evgHyS_ScswcV5_3964.g17449.t1~~evgHyS_ScswcV5_3964.g17449.t1.p1	6.3062	2.20729	0.00427682	0.0405107	evgHyS_ScswcV5_3964.g17449.t1.p1	PREDICTED: tyramine receptor Ser-2-like [Acropora digitifera]	2.16e-12	Type-1 angiotensin II receptor A	CX3CR1	G protein-coupled peptide receptor activity	angiotensin-activated signaling pathway	cell surface
GENE.evgMSTRG.42516.1~~evgMSTRG.42516.1.p1	6.24286	2.18559	0.00428512	0.0405107	evgMSTRG.42516.1.p1	PREDICTED: putative nuclease HARBI1 [Acropora digitifera]	3.23e-50	NA	NA	NA	NA	NA
GENE.evgHyS_ScswcV5_644.g2314.t1~~evgHyS_ScswcV5_644.g2314.t1.p1	2.77606	0.972534	0.00431102	0.0407354	evgHyS_ScswcV5_644.g2314.t1.p1	collagen alpha-5(VI) chain-like [Brachionus plicatilis]	1.6e-09	NA	NA	NA	NA	NA
GENE.evgMSTRG.61427.1~~evgMSTRG.61427.1.p1	3.40497	1.19329	0.00432507	0.0408479	NA	NA	NA	NA	NA	NA	NA	NA
GENE.evgMSTRG.61400.4~~evgMSTRG.61400.4.p1	6.06762	2.12675	0.0043308	0.0408817	evgMSTRG.61400.4.p1	hypothetical protein CAPTEDRAFT_211147, partial [Capitella teleta]	1.36e-19	NA	NA	NA	NA	NA
GENE.evgMSTRG.121342.2~~evgMSTRG.121342.2.p1	3.74985	1.31446	0.00433397	0.0408914	evgMSTRG.121342.2.p1	hypothetical protein LCMAC101_03940 [Marseillevirus LCMAC101]	0.13	NA	NA	NA	NA	NA
GENE.evgHyS_ScswcV5_17.g87.t1~~evgHyS_ScswcV5_17.g87.t1.p1	2.58495	0.906748	0.00436105	0.0410452	evgHyS_ScswcV5_17.g87.t1.p1	Glutathione S-transferase Mu 3 [Anoplopoma fimbria]	1.4e-88	Mu class glutathione S-transferase	NA	glutathione transferase activity	nitrobenzene metabolic process	intercellular bridge
GENE.evgMSTRG.127777.1~~evgMSTRG.127777.1.p1	2.70079	0.949315	0.00444127	0.0416446	evgMSTRG.127777.1.p1	actin [Galdieria sulphuraria]	7.69e-128	NA	NA	NA	NA	NA
GENE.evgtrinLocDN42118c0g1t12~~evgtrinLocDN42118c0g1t12.p1	2.69686	0.94819	0.00445197	0.0417153	evgtrinLocDN42118c0g1t12.p1	PREDICTED: DNA damage-regulated autophagy modulator protein 1-like [Hydra vulgaris]	8.93e-34	DNA damage-regulated autophagy modulator protein 1	NA	NA	regulation of autophagy	integral component of membrane
GENE.evgtrinLocDN656c2g1t6~~evgtrinLocDN656c2g1t6.p1	4.51926	1.59055	0.00449285	0.0420157	evgtrinLocDN656c2g1t6.p1	PREDICTED: voltage-dependent L-type calcium channel subunit alpha-1D-like [Hydra vulgaris]	7.78e-72	Voltage-dependent L-type calcium channel subunit alpha	NA	voltage-gated calcium channel activity	calcium ion transmembrane transport	voltage-gated calcium channel complex
GENE.evgtrinLocDN29645c0g1t3~~evgtrinLocDN29645c0g1t3.p1	2.67274	0.940827	0.00449945	0.0420567	evgtrinLocDN29645c0g1t3.p1	PREDICTED: uncharacterized protein LOC100214568 isoform X1 [Hydra vulgaris]	3.14e-12	NA	NA	NA	NA	NA
GENE.evgtrinLocDN9730c0g1t5~~evgtrinLocDN9730c0g1t5.p1	5.4505	1.91915	0.00451043	0.0421305	evgtrinLocDN9730c0g1t5.p1	PREDICTED: protein YIPF1-like [Hydra vulgaris]	0.16	NA	NA	NA	NA	NA
GENE.evgHyS_ScswcV5_457.g1885.t1~~evgHyS_ScswcV5_457.g1885.t1.p1	2.77396	0.977011	0.00452216	0.0421862	evgHyS_ScswcV5_457.g1885.t1.p1	PREDICTED: potassium voltage-gated channel subfamily A member 7-like [Hydra vulgaris]	4.73e-180	Potassium voltage-gated channel protein Shaker	NA	voltage-gated potassium channel activity	regulation of ion transmembrane transport	voltage-gated potassium channel complex
GENE.evgMSTRG.79235.1~~evgMSTRG.79235.1.p1	5.18861	1.83077	0.00459537	0.0427226	evgMSTRG.79235.1.p1	ubiquitin carboxyl-terminal hydrolase 26 [Micractinium conductrix]	0.006	NA	NA	NA	NA	NA
GENE.evgMSTRG.112429.1~~evgMSTRG.112429.1.p2	5.89267	2.08199	0.0046504	0.0431289	evgMSTRG.112429.1.p2	hypothetical protein AC249_AIPGENE26928 [Exaiptasia pallida]	0.49	NA	NA	NA	NA	NA
GENE.evgtrinLocDN45421c0g1t4~~evgtrinLocDN45421c0g1t4.p1	3.51324	1.24305	0.00470881	0.0435433	evgtrinLocDN45421c0g1t4.p1	E3 ubiquitin-protein ligase RNF5 [Trypanosoma cruzi]	0.13	NA	NA	NA	NA	NA
GENE.evgtrinLocDN4721c0g4t1~~evgtrinLocDN4721c0g4t1.p1	5.89191	2.08499	0.0047152	0.0435813	evgtrinLocDN4721c0g4t1.p1	PREDICTED: uncharacterized protein LOC107334110 [Acropora digitifera]	4.66e-31	Nuclease harbi1	NA	nucleic acid binding	NA	integral component of membrane
GENE.evgtrinLocDN8825c1g1t7~~evgtrinLocDN8825c1g1t7.p1	1.81996	0.644399	0.00473882	0.0437359	evgtrinLocDN8825c1g1t7.p1	PREDICTED: ubiquitin carboxyl-terminal hydrolase CYLD-like [Hydra vulgaris]	1.11e-148	Ubiquitin carboxyl-terminal hydrolase CYLD	NA	thiol-dependent ubiquitinyl hydrolase activity	protein deubiquitination	cytosol
GENE.evgMSTRG.84932.1~~evgMSTRG.84932.1.p1	5.52784	1.95777	0.00474965	0.0437625	evgMSTRG.84932.1.p1	predicted protein [Nematostella vectensis]	8.51e-28	NA	NA	NA	NA	NA
GENE.evgMSTRG.79652.2~~evgMSTRG.79652.2.p3	4.5933	1.62684	0.0047509	0.0437625	NA	NA	NA	NA	NA	NA	NA	NA
GENE.evgtrinLocDN35020c0g1t17~~evgtrinLocDN35020c0g1t17.p1	3.23209	1.14546	0.00477756	0.0439868	evgtrinLocDN35020c0g1t17.p1	PREDICTED: LOW QUALITY PROTEIN: tigger transposable element-derived protein 4-like, partial [Acropora digitifera]	0.34	NA	NA	NA	NA	NA
GENE.evgtrinLocDN31702c1g1t5~~evgtrinLocDN31702c1g1t5.p1	5.41234	1.91992	0.00481672	0.0442404	evgtrinLocDN31702c1g1t5.p1	imidazole glycerol phosphate synthase, glutamine amidotransferase subunit [Ktedonobacter sp. 13_2_20CM_53_11]	0.95	NA	NA	NA	NA	NA
GENE.evgtrinLocDN1096c0g1t4~~evgtrinLocDN1096c0g1t4.p1	5.92556	2.10271	0.00483148	0.0443119	evgtrinLocDN1096c0g1t4.p1	piggyBac transposable element-derived protein 4-like, partial [Athalia rosae]	1.12e-35	PiggyBac transposable element-derived protein 4	PGBD4	G protein-coupled GABA receptor activity	translational elongation	eukaryotic translation elongation factor 1 complex
GENE.evgtrinLocDN18145c0g1t3~~evgtrinLocDN18145c0g1t3.p2	7.41475	2.63155	0.00483785	0.0443276	evgtrinLocDN18145c0g1t3.p2	uncharacterized protein LOC111345028 [Stylophora pistillata]	1.16e-22	NA	NA	NA	NA	NA
GENE.evgtrinLocDN40061c0g1t20~~evgtrinLocDN40061c0g1t20.p1	6.6335	2.35492	0.00484951	0.0443703	evgtrinLocDN40061c0g1t20.p1	PREDICTED: myosin-2 heavy chain-like, partial [Hydra vulgaris]	3.63e-15	NA	NA	NA	NA	NA
GENE.evgMSTRG.31190.1~~evgMSTRG.31190.1.p1	3.89918	1.38462	0.00486162	0.0444358	evgMSTRG.31190.1.p1	uncharacterized protein LOC111333124 [Stylophora pistillata]	1.93e-20	NA	NA	NA	NA	NA
GENE.evgMSTRG.37628.1~~evgMSTRG.37628.1.p1	1.9466	0.691526	0.00487873	0.0445094	evgMSTRG.37628.1.p1	THAP domain-containing protein 6-like isoform X3 [Gouania willdenowi]	2.62e-05	NA	NA	NA	NA	NA
GENE.evgtrinLocDN8340c0g1t5~~evgtrinLocDN8340c0g1t5.p1	1.85166	0.658797	0.00494386	0.0450168	evgtrinLocDN8340c0g1t5.p1	PREDICTED: ubiquitin-associated protein 1-like isoform X1 [Hydra vulgaris]	7.39e-36	Ubiquitin-associated protein 1 (Fragment)	NA	ubiquitin binding	ubiquitin-dependent protein catabolic process via the multivesicular body sorting pathway	ESCRT I complex
GENE.evgMSTRG.119628.4~~evgMSTRG.119628.4.p1	2.42008	0.861207	0.00495253	0.0450531	evgMSTRG.119628.4.p1	H(+)/Cl(-) exchange transporter 5-like [Orbicella faveolata]	0	Chloride channel protein (Fragment)	NA	voltage-gated chloride channel activity	chloride transmembrane transport	early endosome
GENE.evgHyS_ScswcV5_2604.g10805.t1~~evgHyS_ScswcV5_2604.g10805.t1.p1	1.95448	0.695951	0.00497954	0.0451833	evgHyS_ScswcV5_2604.g10805.t1.p1	PREDICTED: putative pyridoxal-dependent decarboxylase domain-containing protein 2 [Hydra vulgaris]	0	Pyridoxal-dependent decarboxylase domain-containing protein 1	PDXDC1	carboxy-lyase activity	carboxylic acid metabolic process	endomembrane system
GENE.evgtrinLocDN2221c0g4t2~~evgtrinLocDN2221c0g4t2.p1	6.54705	2.3315	0.00498366	0.0451833	evgtrinLocDN2221c0g4t2.p1	HlyC/CorC family transporter [Actinospica robiniae]	3	NA	NA	NA	NA	NA
GENE.evgHyS_ScswcV5_2548.g9811.t1~~evgHyS_ScswcV5_2548.g9811.t1.p1	2.53507	0.903171	0.00500269	0.045299	evgHyS_ScswcV5_2548.g9811.t1.p1	PREDICTED: uncharacterized protein LOC101240335 [Hydra vulgaris]	1.23e-24	NA	NA	NA	NA	NA
GENE.evgtrinLocDN40525c0g3t2~~evgtrinLocDN40525c0g3t2.p1	5.18437	1.84749	0.00501334	0.0453679	evgtrinLocDN40525c0g3t2.p1	dihydrofolate reductase [Vibrio phage PWH3a-P1]	1.9	NA	NA	NA	NA	NA
GENE.evgMSTRG.91076.1~~evgMSTRG.91076.1.p1	2.45349	0.874981	0.00504646	0.0456026	evgMSTRG.91076.1.p1	sodium/calcium exchanger 2-like isoform X2 [Exaiptasia pallida]	1.63e-125	Sodium/calcium exchanger 3	LOC100177290	calcium:sodium antiporter activity	sodium ion transmembrane transport	integral component of membrane
GENE.evgtrinLocDN141c0g1t5~~evgtrinLocDN141c0g1t5.p1	2.10366	0.750406	0.00505724	0.0456381	evgtrinLocDN141c0g1t5.p1	PREDICTED: LOW QUALITY PROTEIN: dmX-like protein 2 [Oryctolagus cuniculus]	0	Dmx like 1	DMXL1	NA	NA	integral component of membrane
GENE.evgHyS_ScswcV5_2707.g11125.t1~~evgHyS_ScswcV5_2707.g11125.t1.p1	2.74838	0.980389	0.00505741	0.0456381	evgHyS_ScswcV5_2707.g11125.t1.p1	PREDICTED: glycoprotein-N-acetylgalactosamine 3-beta-galactosyltransferase 1-like [Hydra vulgaris]	2.88e-149	Glycoprotein-N-acetylgalactosamine 3-beta-galactosyltransferase 1	NA	beta-1,3-galactosyltransferase activity	O-glycan processing	membrane
GENE.evgtrinLocDN9925c0g1t12~~evgtrinLocDN9925c0g1t12.p1	2.55972	0.913843	0.00509372	0.0458647	evgtrinLocDN9925c0g1t12.p1	peripheral plasma membrane protein CASK-like [Pocillopora damicornis]	2.52e-86	Peripheral plasma membrane protein CASK	NA	protein kinase activity	protein phosphorylation	nuclear lamina
GENE.evgMSTRG.38240.1~~evgMSTRG.38240.1.p1	3.53885	1.26343	0.00509474	0.0458647	evgMSTRG.38240.1.p1	predicted protein [Nematostella vectensis]	1.61e-47	NA	NA	NA	NA	NA
GENE.evgMSTRG.87562.1~~evgMSTRG.87562.1.p1	3.97193	1.41845	0.00510727	0.045948	evgMSTRG.87562.1.p1	uncharacterized protein LOC110246960 [Exaiptasia pallida]	4.76e-58	Zinc finger protein 771: PROVISIONAL	NA	NA	NA	NA
GENE.evgHyS_ScswcV5_4075.g18657.t1~~evgHyS_ScswcV5_4075.g18657.t1.p1	5.21134	1.86113	0.00510882	0.045948	evgHyS_ScswcV5_4075.g18657.t1.p1	PREDICTED: ATP-dependent DNA helicase Q1-like [Hydra vulgaris]	0	ATP-dependent DNA helicase	RECQL	purine NTP-dependent helicase activity	DNA recombination	nucleus
GENE.evgtrinLocDN151512c1g1t2~~evgtrinLocDN151512c1g1t2.p1	3.74013	1.33693	0.00514912	0.046185	evgtrinLocDN151512c1g1t2.p1	PREDICTED: snRNA-activating protein complex subunit 1-like [Hydra vulgaris]	1.26e-88	snRNA-activating protein complex subunit 1	SNAPC1	NA	NA	NA
GENE.evgHyS_ScswcV5_3978.g17908.t1~~evgHyS_ScswcV5_3978.g17908.t1.p1	3.91738	1.40144	0.00518591	0.0464439	evgHyS_ScswcV5_3978.g17908.t1.p1	hypothetical protein AWC38_SpisGene5150 [Stylophora pistillata]	9.36e-23	NA	NA	NA	NA	NA
GENE.evgtrinLocDN8879c0g1t16~~evgtrinLocDN8879c0g1t16.p1	3.25422	1.16433	0.00519097	0.0464673	evgtrinLocDN8879c0g1t16.p1	peroxisomal NADH pyrophosphatase NUDT12 isoform X1 [Amphiprion ocellaris]	2.02e-88	NAD+ diphosphatase	NUDT12	hydrolase activity	NA	NA
GENE.evgtrinLocDN1321c10g2t5~~evgtrinLocDN1321c10g2t5.p1	5.70394	2.0413	0.00520183	0.0465208	evgtrinLocDN1321c10g2t5.p1	ATP-dependent DNA helicase PIF1 [Exaiptasia pallida]	2.18e-25	NA	NA	NA	NA	NA
GENE.evgtrinLocDN11147c0g1t1~~evgtrinLocDN11147c0g1t1.p1	6.6235	2.37073	0.00520828	0.0465567	evgtrinLocDN11147c0g1t1.p1	DUF4116 domain-containing protein, partial [Flavobacterium sp.]	8.78e-18	NA	NA	NA	NA	NA
GENE.evgtrinLocDN9815c1g2t2~~evgtrinLocDN9815c1g2t2.p1	5.28736	1.8929	0.00521807	0.0465835	evgtrinLocDN9815c1g2t2.p1	uncharacterized protein LOC110044322 [Orbicella faveolata]	2.52e-11	NA	NA	NA	NA	NA
GENE.evgMSTRG.101342.2~~evgMSTRG.101342.2.p1	2.6653	0.954558	0.0052353	0.0466885	evgMSTRG.101342.2.p1	PREDICTED: phosphatidate phosphatase LPIN1-like [Hydra vulgaris]	0	Phosphatidate phosphatase LPIN2	NA	NA	NA	NA
GENE.evgMSTRG.103193.7~~evgMSTRG.103193.7.p1	3.15405	1.13005	0.00525322	0.0468264	evgMSTRG.103193.7.p1	purine-binding chemotaxis protein CheW [Collimonas pratensis]	1.8	NA	NA	NA	NA	NA
GENE.evgMSTRG.132512.1~~evgMSTRG.132512.1.p1	6.05174	2.16949	0.00527933	0.0470372	evgMSTRG.132512.1.p1	predicted protein [Nematostella vectensis]	0.01	NA	NA	NA	NA	NA
GENE.evgHyS_ScswcV5_3906.g17311.t1~~evgHyS_ScswcV5_3906.g17311.t1.p1	3.56626	1.27872	0.00528838	0.0470917	evgHyS_ScswcV5_3906.g17311.t1.p1	Golgi-associated PDZ and coiled-coil motif-containing protein-like [Orbicella faveolata]	4.29e-163	Golgi associated PDZ and coiled-coil motif containing	GOPC	frizzled binding	regulation of Golgi to plasma membrane CFTR protein transport	Golgi apparatus
GENE.evgtrinLocDN12013c0g1t5~~evgtrinLocDN12013c0g1t5.p1	2.24746	0.806641	0.00533303	0.0473605	evgtrinLocDN12013c0g1t5.p1	PREDICTED: gamma-glutamyltranspeptidase 1-like [Priapulus caudatus]	1.96e-55	Gamma-glutamyltranspeptidase	NA	glutathione hydrolase activity	glutathione catabolic process	integral component of membrane
GENE.evgMSTRG.118293.1~~evgMSTRG.118293.1.p1	3.84574	1.38046	0.00533877	0.0473893	evgMSTRG.118293.1.p1	MerR family transcriptional regulator [Marinomonas fungiae]	0.2	NA	NA	NA	NA	NA
GENE.evgHyS_ScswcV5_2457.g9556.t1~~evgHyS_ScswcV5_2457.g9556.t1.p1	4.17396	1.49873	0.00535271	0.0474467	evgHyS_ScswcV5_2457.g9556.t1.p1	PREDICTED: protein DVR-1 homolog [Hydra vulgaris]	2.61e-61	Transforming growth factor 4 protein (Fragment)	NA	growth factor activity	regulation of signaling receptor activity	extracellular region
GENE.evgMSTRG.133404.1~~evgMSTRG.133404.1.p2	4.1913	1.50515	0.00535878	0.0474784	evgMSTRG.133404.1.p2	hypothetical protein AWC38_SpisGene21476 [Stylophora pistillata]	2.06e-24	NA	NA	NA	NA	NA
GENE.evgMSTRG.95578.4~~evgMSTRG.95578.4.p1	2.11896	0.761021	0.00536316	0.0474951	evgMSTRG.95578.4.p1	uncharacterized protein LOC110249179 [Exaiptasia pallida]	1.35e-12	NA	NA	NA	NA	NA
GENE.evgtrinLocDN44141c0g1t12~~evgtrinLocDN44141c0g1t12.p1	6.73464	2.41913	0.00537077	0.0474998	NA	NA	NA	NA	NA	NA	NA	NA
GENE.evgtrinLocDN1092c0g1t9~~evgtrinLocDN1092c0g1t9.p1	5.79759	2.08263	0.00537288	0.0474998	evgtrinLocDN1092c0g1t9.p1	PREDICTED: putative E3 ubiquitin-protein ligase UBR7 [Hydra vulgaris]	7.75e-20	NA	NA	NA	NA	NA
GENE.evgHyS_ScswcV5_457.g1737.t1~~evgHyS_ScswcV5_457.g1737.t1.p1	2.34603	0.842899	0.0053811	0.0475435	evgHyS_ScswcV5_457.g1737.t1.p1	PREDICTED: low-density lipoprotein receptor 2-like isoform X1 [Hydra vulgaris]	0	Lipophorin receptor	NA	calcium ion binding	BMP signaling pathway	receptor complex
GENE.evgMSTRG.74885.1~~evgMSTRG.74885.1.p1	4.66935	1.67967	0.00543716	0.0479566	evgMSTRG.74885.1.p1	MULTISPECIES: AraC family transcriptional regulator [Pseudomonas]	1	NA	NA	NA	NA	NA
GENE.evgMSTRG.34892.1~~evgMSTRG.34892.1.p1	4.22858	1.52114	0.00543793	0.0479566	NA	NA	NA	NA	NA	NA	NA	NA
GENE.evgtrinLocDN6870c0g1t8~~evgtrinLocDN6870c0g1t8.p1	3.13904	1.12982	0.00546371	0.0481171	evgtrinLocDN6870c0g1t8.p1	Retrovirus-related Pol polyprotein from transposon opus [Exaiptasia pallida]	3.61e-105	NA	NA	NA	NA	NA
GENE.evgtrinLocDN10980c0g6t1~~evgtrinLocDN10980c0g6t1.p1	4.54611	1.63646	0.00546911	0.0481423	evgtrinLocDN10980c0g6t1.p1	uncharacterized protein LOC112466153 isoform X1 [Temnothorax curvispinosus]	9.56e-26	NA	NA	NA	NA	NA
GENE.evgHyS_ScswcV5_1325.g4835.t1~~evgHyS_ScswcV5_1325.g4835.t1.p1	2.01201	0.724356	0.0054752	0.0481737	evgHyS_ScswcV5_1325.g4835.t1.p1	predicted protein [Nematostella vectensis]	6.58e-16	NA	NA	NA	NA	NA
GENE.evgMSTRG.131177.1~~evgMSTRG.131177.1.p1	7.38096	2.65925	0.00551043	0.0483496	evgMSTRG.131177.1.p1	hypothetical protein A2103_04280 [Gammaproteobacteria bacterium GWF2_41_13]	5.3	NA	NA	NA	NA	NA
GENE.evgHyS_ScswcV5_3493.g15119.t1~~evgHyS_ScswcV5_3493.g15119.t1.p1	2.70571	0.975538	0.00554468	0.0486053	evgHyS_ScswcV5_3493.g15119.t1.p1	atrial natriuretic peptide receptor 1-like [Stylophora pistillata]	0	Olfactory guanylyl cyclase GC-D	GUCY2F	guanylate cyclase activity	cGMP biosynthetic process	integral component of membrane
GENE.evgHyS_ScswcV5_704.g3213.t1~~evgHyS_ScswcV5_704.g3213.t1.p1	2.70503	0.975361	0.00554796	0.0486116	evgHyS_ScswcV5_704.g3213.t1.p1	PREDICTED: uncharacterized protein LOC100206476 [Hydra vulgaris]	1.13e-62	Zinc finger CCCH domain-containing protein 3	ZC3H3	R-SMAD binding	regulation of mRNA export from nucleus	mRNA cleavage and polyadenylation specificity factor complex
GENE.evgtrinLocDN27482c0g1t11~~evgtrinLocDN27482c0g1t11.p2	6.76768	2.44092	0.00556124	0.0486832	evgtrinLocDN27482c0g1t11.p2	unnamed protein product [Oncorhynchus mykiss]	1.33e-39	NA	NA	NA	NA	NA
GENE.evgHyS_ScswcV5_2427.g9144.t1~~evgHyS_ScswcV5_2427.g9144.t1.p1	4.19761	1.51619	0.00563092	0.0491576	evgHyS_ScswcV5_2427.g9144.t1.p1	PREDICTED: lanC-like protein 3 [Hydra vulgaris]	0	Lanthionine synthetase c like protein 1	LANCL3	catalytic activity	ionotropic glutamate receptor signaling pathway	plasma membrane
GENE.evgHyS_ScswcV5_3204.g12807.t1~~evgHyS_ScswcV5_3204.g12807.t1.p1	3.04788	1.10114	0.00564132	0.0492258	evgHyS_ScswcV5_3204.g12807.t1.p1	PREDICTED: amiloride-sensitive sodium channel subunit alpha-like [Acropora digitifera]	4.16e-44	NA	NA	NA	NA	NA
GENE.evgtrinLocDN59887c0g1t9~~evgtrinLocDN59887c0g1t9.p1	4.345	1.57046	0.0056626	0.0493663	evgtrinLocDN59887c0g1t9.p1	hypothetical protein BP5553_10008 [Phialophora cf. hyalina BP 5553]	6	NA	NA	NA	NA	NA
GENE.evgtrinLocDN6651c0g1t8~~evgtrinLocDN6651c0g1t8.p1	1.82724	0.660786	0.00568797	0.0494871	evgtrinLocDN6651c0g1t8.p1	PREDICTED: coiled-coil and C2 domain-containing protein 1A-like [Hydra vulgaris]	9.68e-175	LOW QUALITY PROTEIN: coiled-coil and C2 domain-containing protein 1A	CC2D1A	DNA-binding transcription repressor activity, RNA polymerase II-specific	negative regulation of transcription by RNA polymerase II	fibrillar center
GENE.evgtrinLocDN19533c1g1t7~~evgtrinLocDN19533c1g1t7.p1	5.11079	1.84841	0.00569288	0.0494871	NA	NA	NA	NA	NA	NA	NA	NA
GENE.evgHyS_ScswcV5_4418.g21026.t1~~evgHyS_ScswcV5_4418.g21026.t1.p1	2.07849	0.751726	0.00569315	0.0494871	evgHyS_ScswcV5_4418.g21026.t1.p1	PREDICTED: low-density lipoprotein receptor-related protein 6-like [Hydra vulgaris]	0	Low-density lipoprotein receptor-related protein 6	LRP6	Wnt-protein binding	canonical Wnt signaling pathway	Wnt-Frizzled-LRP5/6 complex
GENE.evgMSTRG.130227.18~~evgMSTRG.130227.18.p1	2.55008	0.922432	0.00570071	0.0495171	evgMSTRG.130227.18.p1	PREDICTED: ankyrin repeat and fibronectin type-III domain-containing protein 1-like [Hydra vulgaris]	0	Ankyrin repeat and fibronectin type-III domain-containing protein 1	LOC106159834	NA	signal transduction	BLOC-1 complex
GENE.evgMSTRG.138069.1~~evgMSTRG.138069.1.p3	4.51922	1.63498	0.00570844	0.049539	evgMSTRG.138069.1.p3	hypothetical protein AC249_AIPGENE10204 [Exaiptasia pallida]	1.76e-16	NA	NA	NA	NA	NA
GENE.evgtrinLocDN5867c0g1t15~~evgtrinLocDN5867c0g1t15.p1	4.51711	1.63459	0.00571934	0.0496111	evgtrinLocDN5867c0g1t15.p1	alpha/beta fold hydrolase [Amycolatopsis sp. GLM-1]	7	NA	NA	NA	NA	NA
GENE.evgtrinLocDN21595c0g2t11~~evgtrinLocDN21595c0g2t11.p1	4.34244	1.57208	0.00574068	0.0497282	evgtrinLocDN21595c0g2t11.p1	Uncharacterized protein 259R [Exaiptasia pallida]	9.5	NA	NA	NA	NA	NA
GENE.evgMSTRG.31135.1~~evgMSTRG.31135.1.p1	3.36382	1.21922	0.00579793	0.0500874	evgMSTRG.31135.1.p1	trichohyalin-like [Orbicella faveolata]	5.83e-06	NA	NA	NA	NA	NA
GENE.evgMSTRG.98361.4~~evgMSTRG.98361.4.p1	4.47012	1.62048	0.00580653	0.0501389	evgMSTRG.98361.4.p1	hypothetical protein CAPTEDRAFT_213860 [Capitella teleta]	1.46e-06	NA	NA	NA	NA	NA
GENE.evgMSTRG.80322.1~~evgMSTRG.80322.1.p1	2.44717	0.887338	0.00581781	0.0502136	evgMSTRG.80322.1.p1	precursor protein for RFamide [Hydractinia echinata]	0	Precursor protein for RFamide	NA	NA	neuropeptide signaling pathway	extracellular region
GENE.evgHyS_ScswcV5_3796.g16405.t1~~evgHyS_ScswcV5_3796.g16405.t1.p1	2.27982	0.826925	0.00583379	0.0502756	evgHyS_ScswcV5_3796.g16405.t1.p1	PREDICTED: uncharacterized protein LOC105848655 [Hydra vulgaris]	0	Adaptor protein, phosphotyrosine interaction, PH domain and leucine zipper containing 2	TUBGCP6	gamma-tubulin binding	microtubule nucleation	spindle pole
GENE.evgHyS_ScswcV5_3339.g14177.t1~~evgHyS_ScswcV5_3339.g14177.t1.p1	3.78705	1.37372	0.00583741	0.0502756	evgHyS_ScswcV5_3339.g14177.t1.p1	PREDICTED: glutamine-rich protein 2-like [Hydra vulgaris]	1.1e-112	Glutamine-rich protein 2	NA	NA	NA	NA
GENE.evgMSTRG.27245.4~~evgMSTRG.27245.4.p1	1.96801	0.713891	0.0058382	0.0502756	evgMSTRG.27245.4.p1	long-chain fatty acid transport protein 4 [Fundulus heteroclitus]	0	Long-chain fatty acid transport protein 4	NA	very long-chain fatty acid-CoA ligase activity	fatty acid transport	integral component of membrane
GENE.evgMSTRG.95620.1~~evgMSTRG.95620.1.p1	1.70509	0.618604	0.00584508	0.0503121	evgMSTRG.95620.1.p1	PREDICTED: protein unc-13 homolog A-like [Hydra vulgaris]	0	Phorbol ester/diacylglycerol-binding protein unc-13	UNC-13	diacylglycerol binding	chemical synaptic transmission	terminal bouton
GENE.evgHyS_ScswcV5_644.g2135.t1~~evgHyS_ScswcV5_644.g2135.t1.p1	3.46156	1.25681	0.00588292	0.0505644	evgHyS_ScswcV5_644.g2135.t1.p1	PREDICTED: uncharacterized protein LOC105844134 [Hydra vulgaris]	0	Putative RNA-directed DNA polymerase from transposon BS	NA	RNA-directed DNA polymerase activity	RNA-dependent DNA biosynthetic process	NA
GENE.evgHyS_ScswcV5_3470.g14618.t1~~evgHyS_ScswcV5_3470.g14618.t1.p1	4.86365	1.76595	0.00588502	0.0505644	evgHyS_ScswcV5_3470.g14618.t1.p1	Poly [ADP-ribose] polymerase 14 [Mizuhopecten yessoensis]	0.39	NA	NA	NA	NA	NA
GENE.evgtrinLocDN38509c0g1t11~~evgtrinLocDN38509c0g1t11.p1	3.21012	1.16671	0.00593373	0.0509208	evgtrinLocDN38509c0g1t11.p1	predicted protein [Nematostella vectensis]	7.52e-20	Ligand-gated ion channel	NA	ionotropic glutamate receptor activity	ionotropic glutamate receptor signaling pathway	voltage-gated potassium channel complex
GENE.evgtrinLocDN11647c0g1t2~~evgtrinLocDN11647c0g1t2.p1	4.47853	1.62774	0.00593451	0.0509208	evgtrinLocDN11647c0g1t2.p1	hypothetical protein DRO88_05825 [Candidatus Lokiarchaeota archaeon]	0.58	NA	NA	NA	NA	NA
GENE.evgtrinLocDN33181c0g1t17~~evgtrinLocDN33181c0g1t17.p1	6.10734	2.22071	0.00595628	0.0510845	evgtrinLocDN33181c0g1t17.p1	elongation factor Tu [Desulfomicrobium baculatum]	0.85	NA	NA	NA	NA	NA
GENE.evgHyS_ScswcV5_2444.g9402.t1~~evgHyS_ScswcV5_2444.g9402.t1.p1	4.61401	1.67831	0.00597426	0.0511657	evgHyS_ScswcV5_2444.g9402.t1.p1	TNF receptor-associated factor 6-B-like isoform X1 [Orbicella faveolata]	2.35e-34	NA	NA	NA	NA	NA
GENE.evgHyS_ScswcV5_2436.g9311.t1~~evgHyS_ScswcV5_2436.g9311.t1.p1	2.65696	0.966548	0.00597919	0.0511657	evgHyS_ScswcV5_2436.g9311.t1.p1	PREDICTED: uncharacterized protein LOC105320693 [Crassostrea gigas]	3.83e-111	3-hydroxybutyrate dehydrogenase type 2	NA	oxidoreductase activity	oxidation-reduction process	integral component of membrane
GENE.evgMSTRG.60669.1~~evgMSTRG.60669.1.p1	7.36492	2.68164	0.0060248	0.0514866	evgMSTRG.60669.1.p1	PREDICTED: uncharacterized protein LOC101239129 [Hydra vulgaris]	8.59e-94	Zinc knuckle (Fragment)	POL	zinc ion binding	proteolysis	NA
GENE.evgMSTRG.119654.2~~evgMSTRG.119654.2.p1	2.84707	1.03751	0.00606704	0.0517779	evgMSTRG.119654.2.p1	PREDICTED: myotubularin-related protein 6 [Hydra vulgaris]	0	Myotubularin	NA	phosphatidylinositol phosphate phosphatase activity	phosphatidylinositol dephosphorylation	nuclear envelope
GENE.evgHyS_ScswcV5_2461.g9651.t1~~evgHyS_ScswcV5_2461.g9651.t1.p1	1.86206	0.678616	0.00607117	0.0517864	evgHyS_ScswcV5_2461.g9651.t1.p1	PREDICTED: cytoskeleton-associated protein 5-like [Hydra vulgaris]	0	Cytoskeleton-associated protein 5	CKAP5	microtubule plus-end binding	establishment or maintenance of microtubule cytoskeleton polarity	microtubule plus-end
GENE.evgMSTRG.72802.1~~evgMSTRG.72802.1.p1	2.26806	0.826671	0.0060769	0.0517864	evgMSTRG.72802.1.p1	hypothetical protein CAPTEDRAFT_213860 [Capitella teleta]	2.63e-24	NA	NA	NA	NA	NA
GENE.evgtrinLocDN1114c1g1t18~~evgtrinLocDN1114c1g1t18.p1	2.09642	0.764115	0.00607697	0.0517864	evgtrinLocDN1114c1g1t18.p1	PREDICTED: fascin-like [Hydra vulgaris]	1.34e-165	Fascin actin-bundling protein 2, retinal	NA	protein binding, bridging	actin filament organization	cytoskeleton
GENE.evgtrinLocDN13888c0g1t9~~evgtrinLocDN13888c0g1t9.p1	1.99313	0.726494	0.00607892	0.0517864	evgtrinLocDN13888c0g1t9.p1	PREDICTED: pericentriolar material 1 protein-like, partial [Hydra vulgaris]	0	NA	NA	NA	NA	NA
GENE.evgtrinLocDN14149c0g1t4~~evgtrinLocDN14149c0g1t4.p1	3.20327	1.16863	0.00612443	0.0521042	NA	NA	NA	NA	NA	NA	NA	NA
GENE.evgMSTRG.91466.1~~evgMSTRG.91466.1.p1	3.70325	1.35198	0.00616	0.0522337	evgMSTRG.91466.1.p1	hypothetical protein PBRA_004217 [Plasmodiophora brassicae]	2.68e-45	NA	NA	NA	NA	NA
GENE.evgMSTRG.28241.1~~evgMSTRG.28241.1.p1	5.95554	2.1743	0.0061616	0.0522337	NA	NA	NA	NA	NA	NA	NA	NA
GENE.evgHyS_ScswcV5_3415.g14332.t1~~evgHyS_ScswcV5_3415.g14332.t1.p1	7.41371	2.70774	0.00618188	0.0523654	evgHyS_ScswcV5_3415.g14332.t1.p1	PREDICTED: rhamnose-binding lectin-like [Hydra vulgaris]	6.87e-44	NA	NA	NA	NA	NA
GENE.evgHyS_ScswcV5_1783.g6958.t1~~evgHyS_ScswcV5_1783.g6958.t1.p1	2.40353	0.87841	0.00621488	0.052511	evgHyS_ScswcV5_1783.g6958.t1.p1	predicted protein [Nematostella vectensis]	0	Solute carrier family 12 (sodium/potassium/chloride transporter), member 1	SLC12A3	cation:chloride symporter activity	chloride transmembrane transport	apical plasma membrane
GENE.evgtrinLocDN37743c0g1t8~~evgtrinLocDN37743c0g1t8.p1	2.84769	1.04081	0.00621835	0.052511	evgtrinLocDN37743c0g1t8.p1	PREDICTED: putative uncharacterized protein DDB_G0274535 [Hydra vulgaris]	2.58e-07	NA	NA	NA	NA	NA
GENE.evgMSTRG.47433.1~~evgMSTRG.47433.1.p1	5.17996	1.8936	0.00622842	0.0525196	evgMSTRG.47433.1.p1	hypothetical protein [Streptomyces graminilatus]	2.1	NA	NA	NA	NA	NA
GENE.evgMSTRG.72695.5~~evgMSTRG.72695.5.p1	5.40067	1.97516	0.00625131	0.0526892	evgMSTRG.72695.5.p1	PREDICTED: uncharacterized protein LOC100197757 [Hydra vulgaris]	9.2e-131	NA	NA	NA	NA	NA
GENE.evgMSTRG.135947.8~~evgMSTRG.135947.8.p1	2.18881	0.800661	0.00626176	0.0527539	evgMSTRG.135947.8.p1	PREDICTED: uncharacterized protein LOC100204660 [Hydra vulgaris]	1e-121	NA	NA	NA	NA	NA
GENE.evgMSTRG.74427.1~~evgMSTRG.74427.1.p1	2.58305	0.945401	0.00629081	0.052905	evgMSTRG.74427.1.p1	hypothetical protein BSL78_28434 [Apostichopus japonicus]	1.39e-34	NA	NA	NA	NA	NA
GENE.evgHyS_ScswcV5_3339.g14082.t1~~evgHyS_ScswcV5_3339.g14082.t1.p1	3.59163	1.31479	0.00630068	0.0529413	evgHyS_ScswcV5_3339.g14082.t1.p1	PREDICTED: probable acyl-CoA dehydrogenase 6 [Hydra vulgaris]	0	Guanine nucleotide-binding protein subunit gamma	NA	acyl-CoA dehydrogenase activity	oxidation-reduction process	plasma membrane
GENE.evgtrinLocDN9928c0g1t1~~evgtrinLocDN9928c0g1t1.p1	6.46599	2.36948	0.0063553	0.0532661	evgtrinLocDN9928c0g1t1.p1	hypothetical protein NEMVEDRAFT_v1g225245 [Nematostella vectensis]	3.63e-11	NA	NA	NA	NA	NA
GENE.evgtrinLocDN39478c0g1t16~~evgtrinLocDN39478c0g1t16.p1	2.38321	0.873583	0.0063702	0.0533371	evgtrinLocDN39478c0g1t16.p1	PREDICTED: very long-chain specific acyl-CoA dehydrogenase, mitochondrial-like [Hydra vulgaris]	1.53e-94	Very long-chain specific acyl-CoA dehydrogenase	NA	acyl-CoA dehydrogenase activity	oxidation-reduction process	mitochondrial nucleoid
[truncated: 385 more rows]

## Sheet: RFamide-high vs control
gene_id	log2_fc	log2_FC_SE	pval	padj	transcript_id	best_BLAST_hit	eval	pannzer_description	pannzer_gene_name	molecular_function	biological_processes	cellular_component
[truncated: 800 more rows]

[truncated: 5 more sheets: RFamide-low vs Soxb2, RFamide high vs Soxb2, Soxb2 vs RFamide-low, Soxb2 vs RFamide-high, Soxb2 vs control]
