# Supplementary material for: A cellular and molecular analysis of SoxB-driven neurogenesis in a cnidarian
Source: eLife. 2022 May 24;11:e78793. doi: 10.7554/eLife.78793 (PMC9173746; doi:10.7554/eLife.78793)
Supplement: Supplementary file 4. [file elife-78793-supp4.xlsx]

## Sheet: SRA_accession_information
BioProject	Library_ID	Sample_name	Biosample_accession	Accession
PRJNA549873	P1_2	Piwi1_1.2_progenitors	SAMN18789452	SRR14265608
PRJNA549873	P1_3	Piwi1_1.3_nematocytes	SAMN18789453	SRR14265607
PRJNA549873	P2_2	Piwi1_2.2 progenitors	SAMN18789454	SRR14265617
PRJNA549873	P2_3	Piwi1_2.3_nematocytes	SAMN18789455	SRR14265615
PRJNA549873	P3_2	Piwi1_3.2_progenitors	SAMN18789456	SRR14265614
PRJNA549873	P3_3	Piwi1_3.3_nematocytes	SAMN18789457	SRR14265613
PRJNA549873	S1_1	SoxB2_1.1_neural_progenitors	SAMN18789458	SRR14265612
PRJNA549873	S1_2	SoxB2_1.2_negative	SAMN18789459	SRR14265611
PRJNA549873	S2_1	SoxB2_2.1_neural_progenitors	SAMN18789460	SRR14265610
PRJNA549873	S2_2	SoxB2_2.2_negative	SAMN18789461	SRR14265609
PRJNA549873	S3_1	SoxB2_3.1_neural_progenitors	SAMN18789462	SRR14265606
PRJNA549873	S3_2	SoxB2_3.2_negative	SAMN18789463	SRR14265626
PRJNA549873	RF1_1	Rfamide_1.1_sensory	SAMN18789464	SRR14265625
PRJNA549873	RF1_2	Rfamide_1.2_ganglionic	SAMN18789465	SRR14265624
PRJNA549873	RF1_3	Rfamide_1.3_negative	SAMN18789466	SRR14265623
PRJNA549873	RF2_1	Rfamide_2.1_sensory	SAMN18789467	SRR14265622
PRJNA549873	RF2_2	Rfamide_2.2_ganglionic	SAMN18789468	SRR14265621
PRJNA549873	RF2_3	Rfamide_2.3_negative	SAMN18789469	SRR14265620
PRJNA549873	RF3_1	Rfamide_3.1_sensory	SAMN18789470	SRR14265619
PRJNA549873	RF3_2	Rfamide_3.2_ganglionic	SAMN18789471	SRR14265618
PRJNA549873	RF3_3	Rfamide_3.3_negative	SAMN18789472	SRR14265616

## Sheet: metadata-9463564-processed-ok
accession	study	object_status	bioproject_accession	biosample_accession	sample_name	library_ID	title	library_strategy	library_source	library_selection	library_layout	platform	instrument_model	design_description	filetype	filename	filename2	filename3	filename4	assembly	fasta_file
SRR14265608	SRP201979	new	PRJNA549873	SAMN18789452	Piwi1_1.2_progenitors	P1_2	RNAseq of Hydractinia symbiolongicarpus: bulk cell sorted adult polyp	RNA-Seq	TRANSCRIPTOMIC	PolyA	paired	ILLUMINA	Illumina NovaSeq 6000	The bulk cell-sorted RNA samples were amplified with the Ovation RNA-Seq System V2 kit, and sequencing libraries were made with the Illumina TruSeq Stranded mRNA Library Prep Kit.	fastq	HC3THDSXX_18338974_S99_L002_R1_001.fastq.gz	HC3THDSXX_18338974_S99_L002_R2_001.fastq.gz	HC53WDSXX_18338974_S27_L001_R1_001.fastq.gz	HC53WDSXX_18338974_S27_L001_R2_001.fastq.gz
SRR14265607	SRP201979	new	PRJNA549873	SAMN18789453	Piwi1_1.3_nematocytes	P1_3	RNAseq of Hydractinia symbiolongicarpus: bulk cell sorted adult polyp	RNA-Seq	TRANSCRIPTOMIC	PolyA	paired	ILLUMINA	Illumina NovaSeq 6000	The bulk cell-sorted RNA samples were amplified with the Ovation RNA-Seq System V2 kit, and sequencing libraries were made with the Illumina TruSeq Stranded mRNA Library Prep Kit.	fastq	HC3THDSXX_18338966_S91_L002_R1_001.fastq.gz	HC3THDSXX_18338966_S91_L002_R2_001.fastq.gz	HC53WDSXX_18338966_S19_L001_R1_001.fastq.gz	HC53WDSXX_18338966_S19_L001_R2_001.fastq.gz
SRR14265617	SRP201979	new	PRJNA549873	SAMN18789454	Piwi1_2.2 progenitors	P2_2	RNAseq of Hydractinia symbiolongicarpus: bulk cell sorted adult polyp	RNA-Seq	TRANSCRIPTOMIC	PolyA	paired	ILLUMINA	Illumina NovaSeq 6000	The bulk cell-sorted RNA samples were amplified with the Ovation RNA-Seq System V2 kit, and sequencing libraries were made with the Illumina TruSeq Stranded mRNA Library Prep Kit.	fastq	HC53WDSXX_18338968_S21_L001_R1_001.fastq.gz	HC53WDSXX_18338968_S21_L001_R2_001.fastq.gz	HC3THDSXX_18338968_S93_L002_R1_001.fastq.gz	HC3THDSXX_18338968_S93_L002_R2_001.fastq.gz
SRR14265615	SRP201979	new	PRJNA549873	SAMN18789455	Piwi1_2.3_nematocytes	P2_3	RNAseq of Hydractinia symbiolongicarpus: bulk cell sorted adult polyp	RNA-Seq	TRANSCRIPTOMIC	PolyA	paired	ILLUMINA	Illumina NovaSeq 6000	The bulk cell-sorted RNA samples were amplified with the Ovation RNA-Seq System V2 kit, and sequencing libraries were made with the Illumina TruSeq Stranded mRNA Library Prep Kit.	fastq	HC53WDSXX_18338955_S8_L001_R1_001.fastq.gz	HC53WDSXX_18338955_S8_L001_R2_001.fastq.gz	HC3THDSXX_18338955_S80_L002_R1_001.fastq.gz	HC3THDSXX_18338955_S80_L002_R2_001.fastq.gz
SRR14265614	SRP201979	new	PRJNA549873	SAMN18789456	Piwi1_3.2_progenitors	P3_2	RNAseq of Hydractinia symbiolongicarpus: bulk cell sorted adult polyp	RNA-Seq	TRANSCRIPTOMIC	PolyA	paired	ILLUMINA	Illumina NovaSeq 6000	The bulk cell-sorted RNA samples were amplified with the Ovation RNA-Seq System V2 kit, and sequencing libraries were made with the Illumina TruSeq Stranded mRNA Library Prep Kit.	fastq	HC3THDSXX_18338950_S75_L002_R1_001.fastq.gz	HC3THDSXX_18338950_S75_L002_R2_001.fastq.gz	HC53WDSXX_18338950_S3_L001_R1_001.fastq.gz	HC53WDSXX_18338950_S3_L001_R2_001.fastq.gz
SRR14265613	SRP201979	new	PRJNA549873	SAMN18789457	Piwi1_3.3_nematocytes	P3_3	RNAseq of Hydractinia symbiolongicarpus: bulk cell sorted adult polyp	RNA-Seq	TRANSCRIPTOMIC	PolyA	paired	ILLUMINA	Illumina NovaSeq 6000	The bulk cell-sorted RNA samples were amplified with the Ovation RNA-Seq System V2 kit, and sequencing libraries were made with the Illumina TruSeq Stranded mRNA Library Prep Kit.	fastq	HC3THDSXX_18338962_S87_L002_R1_001.fastq.gz	HC3THDSXX_18338962_S87_L002_R2_001.fastq.gz	HC53WDSXX_18338962_S15_L001_R1_001.fastq.gz	HC53WDSXX_18338962_S15_L001_R2_001.fastq.gz
SRR14265612	SRP201979	new	PRJNA549873	SAMN18789458	SoxB2_1.1_neural_progenitors	S1_1	RNAseq of Hydractinia symbiolongicarpus: bulk cell sorted adult polyp	RNA-Seq	TRANSCRIPTOMIC	PolyA	paired	ILLUMINA	Illumina NovaSeq 6000	The bulk cell-sorted RNA samples were amplified with the Ovation RNA-Seq System V2 kit, and sequencing libraries were made with the Illumina TruSeq Stranded mRNA Library Prep Kit.	fastq	HC3THDSXX_18338972_S97_L002_R1_001.fastq.gz	HC3THDSXX_18338972_S97_L002_R2_001.fastq.gz	HC53WDSXX_18338972_S25_L001_R1_001.fastq.gz	HC53WDSXX_18338972_S25_L001_R2_001.fastq.gz
SRR14265611	SRP201979	new	PRJNA549873	SAMN18789459	SoxB2_1.2_negative	S1_2	RNAseq of Hydractinia symbiolongicarpus: bulk cell sorted adult polyp	RNA-Seq	TRANSCRIPTOMIC	PolyA	paired	ILLUMINA	Illumina NovaSeq 6000	The bulk cell-sorted RNA samples were amplified with the Ovation RNA-Seq System V2 kit, and sequencing libraries were made with the Illumina TruSeq Stranded mRNA Library Prep Kit.	fastq	HC53WDSXX_18338954_S7_L001_R1_001.fastq.gz	HC53WDSXX_18338954_S7_L001_R2_001.fastq.gz	HC3THDSXX_18338954_S79_L002_R1_001.fastq.gz	HC3THDSXX_18338954_S79_L002_R2_001.fastq.gz
SRR14265610	SRP201979	new	PRJNA549873	SAMN18789460	SoxB2_2.1_neural_progenitors	S2_1	RNAseq of Hydractinia symbiolongicarpus: bulk cell sorted adult polyp	RNA-Seq	TRANSCRIPTOMIC	PolyA	paired	ILLUMINA	Illumina NovaSeq 6000	The bulk cell-sorted RNA samples were amplified with the Ovation RNA-Seq System V2 kit, and sequencing libraries were made with the Illumina TruSeq Stranded mRNA Library Prep Kit.	fastq	HC3THDSXX_18338965_S90_L002_R1_001.fastq.gz	HC3THDSXX_18338965_S90_L002_R2_001.fastq.gz	HC53WDSXX_18338965_S18_L001_R1_001.fastq.gz	HC53WDSXX_18338965_S18_L001_R2_001.fastq.gz
SRR14265609	SRP201979	new	PRJNA549873	SAMN18789461	SoxB2_2.2_negative	S2_2	RNAseq of Hydractinia symbiolongicarpus: bulk cell sorted adult polyp	RNA-Seq	TRANSCRIPTOMIC	PolyA	paired	ILLUMINA	Illumina NovaSeq 6000	The bulk cell-sorted RNA samples were amplified with the Ovation RNA-Seq System V2 kit, and sequencing libraries were made with the Illumina TruSeq Stranded mRNA Library Prep Kit.	fastq	HC53WDSXX_18338949_S2_L001_R1_001.fastq.gz	HC53WDSXX_18338949_S2_L001_R2_001.fastq.gz	HC3THDSXX_18338949_S74_L002_R1_001.fastq.gz	HC3THDSXX_18338949_S74_L002_R2_001.fastq.gz
SRR14265606	SRP201979	new	PRJNA549873	SAMN18789462	SoxB2_3.1_neural_progenitors	S3_1	RNAseq of Hydractinia symbiolongicarpus: bulk cell sorted adult polyp	RNA-Seq	TRANSCRIPTOMIC	PolyA	paired	ILLUMINA	Illumina NovaSeq 6000	The bulk cell-sorted RNA samples were amplified with the Ovation RNA-Seq System V2 kit, and sequencing libraries were made with the Illumina TruSeq Stranded mRNA Library Prep Kit.	fastq	HC3THDSXX_18338967_S92_L002_R1_001.fastq.gz	HC3THDSXX_18338967_S92_L002_R2_001.fastq.gz	HC53WDSXX_18338967_S20_L001_R1_001.fastq.gz	HC53WDSXX_18338967_S20_L001_R2_001.fastq.gz
SRR14265626	SRP201979	new	PRJNA549873	SAMN18789463	SoxB2_3.2_negative	S3_2	RNAseq of Hydractinia symbiolongicarpus: bulk cell sorted adult polyp	RNA-Seq	TRANSCRIPTOMIC	PolyA	paired	ILLUMINA	Illumina NovaSeq 6000	The bulk cell-sorted RNA samples were amplified with the Ovation RNA-Seq System V2 kit, and sequencing libraries were made with the Illumina TruSeq Stranded mRNA Library Prep Kit.	fastq	HC53WDSXX_18338978_S31_L001_R1_001.fastq.gz	HC53WDSXX_18338978_S31_L001_R2_001.fastq.gz	HC3THDSXX_18338978_S103_L002_R1_001.fastq.gz	HC3THDSXX_18338978_S103_L002_R2_001.fastq.gz
SRR14265625	SRP201979	new	PRJNA549873	SAMN18789464	Rfamide_1.1_sensory	RF1_1	RNAseq of Hydractinia symbiolongicarpus: bulk cell sorted adult polyp	RNA-Seq	TRANSCRIPTOMIC	PolyA	paired	ILLUMINA	Illumina NovaSeq 6000	The bulk cell-sorted RNA samples were amplified with the Ovation RNA-Seq System V2 kit, and sequencing libraries were made with the Illumina TruSeq Stranded mRNA Library Prep Kit.	fastq	HC53WDSXX_18338948_S1_L001_R1_001.fastq.gz	HC53WDSXX_18338948_S1_L001_R2_001.fastq.gz	HC3THDSXX_18338948_S73_L002_R1_001.fastq.gz	HC3THDSXX_18338948_S73_L002_R2_001.fastq.gz
SRR14265624	SRP201979	new	PRJNA549873	SAMN18789465	Rfamide_1.2_ganglionic	RF1_2	RNAseq of Hydractinia symbiolongicarpus: bulk cell sorted adult polyp	RNA-Seq	TRANSCRIPTOMIC	PolyA	paired	ILLUMINA	Illumina NovaSeq 6000	The bulk cell-sorted RNA samples were amplified with the Ovation RNA-Seq System V2 kit, and sequencing libraries were made with the Illumina TruSeq Stranded mRNA Library Prep Kit.	fastq	HC3THDSXX_18338989_S114_L002_R1_001.fastq.gz	HC3THDSXX_18338989_S114_L002_R2_001.fastq.gz	HC53WDSXX_18338989_S42_L001_R1_001.fastq.gz	HC53WDSXX_18338989_S42_L001_R2_001.fastq.gz
SRR14265623	SRP201979	new	PRJNA549873	SAMN18789466	Rfamide_1.3_negative	RF1_3	RNAseq of Hydractinia symbiolongicarpus: bulk cell sorted adult polyp	RNA-Seq	TRANSCRIPTOMIC	PolyA	paired	ILLUMINA	Illumina NovaSeq 6000	The bulk cell-sorted RNA samples were amplified with the Ovation RNA-Seq System V2 kit, and sequencing libraries were made with the Illumina TruSeq Stranded mRNA Library Prep Kit.	fastq	HC3THDSXX_18338959_S84_L002_R1_001.fastq.gz	HC3THDSXX_18338959_S84_L002_R2_001.fastq.gz	HC53WDSXX_18338959_S12_L001_R1_001.fastq.gz	HC53WDSXX_18338959_S12_L001_R2_001.fastq.gz
SRR14265622	SRP201979	new	PRJNA549873	SAMN18789467	Rfamide_2.1_sensory	RF2_1	RNAseq of Hydractinia symbiolongicarpus: bulk cell sorted adult polyp	RNA-Seq	TRANSCRIPTOMIC	PolyA	paired	ILLUMINA	Illumina NovaSeq 6000	The bulk cell-sorted RNA samples were amplified with the Ovation RNA-Seq System V2 kit, and sequencing libraries were made with the Illumina TruSeq Stranded mRNA Library Prep Kit.	fastq	HC3THDSXX_18338977_S102_L002_R1_001.fastq.gz	HC3THDSXX_18338977_S102_L002_R2_001.fastq.gz	HC53WDSXX_18338977_S30_L001_R1_001.fastq.gz	HC53WDSXX_18338977_S30_L001_R2_001.fastq.gz
SRR14265621	SRP201979	new	PRJNA549873	SAMN18789468	Rfamide_2.2_ganglionic	RF2_2	RNAseq of Hydractinia symbiolongicarpus: bulk cell sorted adult polyp	RNA-Seq	TRANSCRIPTOMIC	PolyA	paired	ILLUMINA	Illumina NovaSeq 6000	The bulk cell-sorted RNA samples were amplified with the Ovation RNA-Seq System V2 kit, and sequencing libraries were made with the Illumina TruSeq Stranded mRNA Library Prep Kit.	fastq	HC3THDSXX_18338985_S110_L002_R1_001.fastq.gz	HC3THDSXX_18338985_S110_L002_R2_001.fastq.gz	HC53WDSXX_18338985_S38_L001_R1_001.fastq.gz	HC53WDSXX_18338985_S38_L001_R2_001.fastq.gz
SRR14265620	SRP201979	new	PRJNA549873	SAMN18789469	Rfamide_2.3_negative	RF2_3	RNAseq of Hydractinia symbiolongicarpus: bulk cell sorted adult polyp	RNA-Seq	TRANSCRIPTOMIC	PolyA	paired	ILLUMINA	Illumina NovaSeq 6000	The bulk cell-sorted RNA samples were amplified with the Ovation RNA-Seq System V2 kit, and sequencing libraries were made with the Illumina TruSeq Stranded mRNA Library Prep Kit.	fastq	HC53WDSXX_18338970_S23_L001_R1_001.fastq.gz	HC53WDSXX_18338970_S23_L001_R2_001.fastq.gz	HC3THDSXX_18338970_S95_L002_R1_001.fastq.gz	HC3THDSXX_18338970_S95_L002_R2_001.fastq.gz
SRR14265619	SRP201979	new	PRJNA549873	SAMN18789470	Rfamide_3.1_sensory	RF3_1	RNAseq of Hydractinia symbiolongicarpus: bulk cell sorted adult polyp	RNA-Seq	TRANSCRIPTOMIC	PolyA	paired	ILLUMINA	Illumina NovaSeq 6000	The bulk cell-sorted RNA samples were amplified with the Ovation RNA-Seq System V2 kit, and sequencing libraries were made with the Illumina TruSeq Stranded mRNA Library Prep Kit.	fastq	HC3THDSXX_18338988_S113_L002_R1_001.fastq.gz	HC3THDSXX_18338988_S113_L002_R2_001.fastq.gz	HC53WDSXX_18338988_S41_L001_R1_001.fastq.gz	HC53WDSXX_18338988_S41_L001_R2_001.fastq.gz
SRR14265618	SRP201979	new	PRJNA549873	SAMN18789471	Rfamide_3.2_ganglionic	RF3_2	RNAseq of Hydractinia symbiolongicarpus: bulk cell sorted adult polyp	RNA-Seq	TRANSCRIPTOMIC	PolyA	paired	ILLUMINA	Illumina NovaSeq 6000	The bulk cell-sorted RNA samples were amplified with the Ovation RNA-Seq System V2 kit, and sequencing libraries were made with the Illumina TruSeq Stranded mRNA Library Prep Kit.	fastq	HC53WDSXX_18338987_S40_L001_R1_001.fastq.gz	HC53WDSXX_18338987_S40_L001_R2_001.fastq.gz	HC3THDSXX_18338987_S112_L002_R1_001.fastq.gz	HC3THDSXX_18338987_S112_L002_R2_001.fastq.gz
SRR14265616	SRP201979	new	PRJNA549873	SAMN18789472	Rfamide_3.3_negative	RF3_3	RNAseq of Hydractinia symbiolongicarpus: bulk cell sorted adult polyp	RNA-Seq	TRANSCRIPTOMIC	PolyA	paired	ILLUMINA	Illumina NovaSeq 6000	The bulk cell-sorted RNA samples were amplified with the Ovation RNA-Seq System V2 kit, and sequencing libraries were made with the Illumina TruSeq Stranded mRNA Library Prep Kit.	fastq	HC53WDSXX_18338957_S10_L001_R1_001.fastq.gz	HC53WDSXX_18338957_S10_L001_R2_001.fastq.gz	HC3THDSXX_18338957_S82_L002_R1_001.fastq.gz	HC3THDSXX_18338957_S82_L002_R2_001.fastq.gz
