# Supplementary figures and images for: A cellular and molecular analysis of SoxB-driven neurogenesis in a cnidarian
Source: eLife journal article supplement (doi:10.7554/elife.78793), 2022-05-24

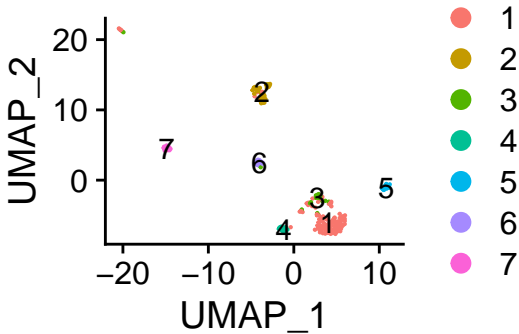

Supplement: supp3 [file elife-78793-supp3-v3.zip]

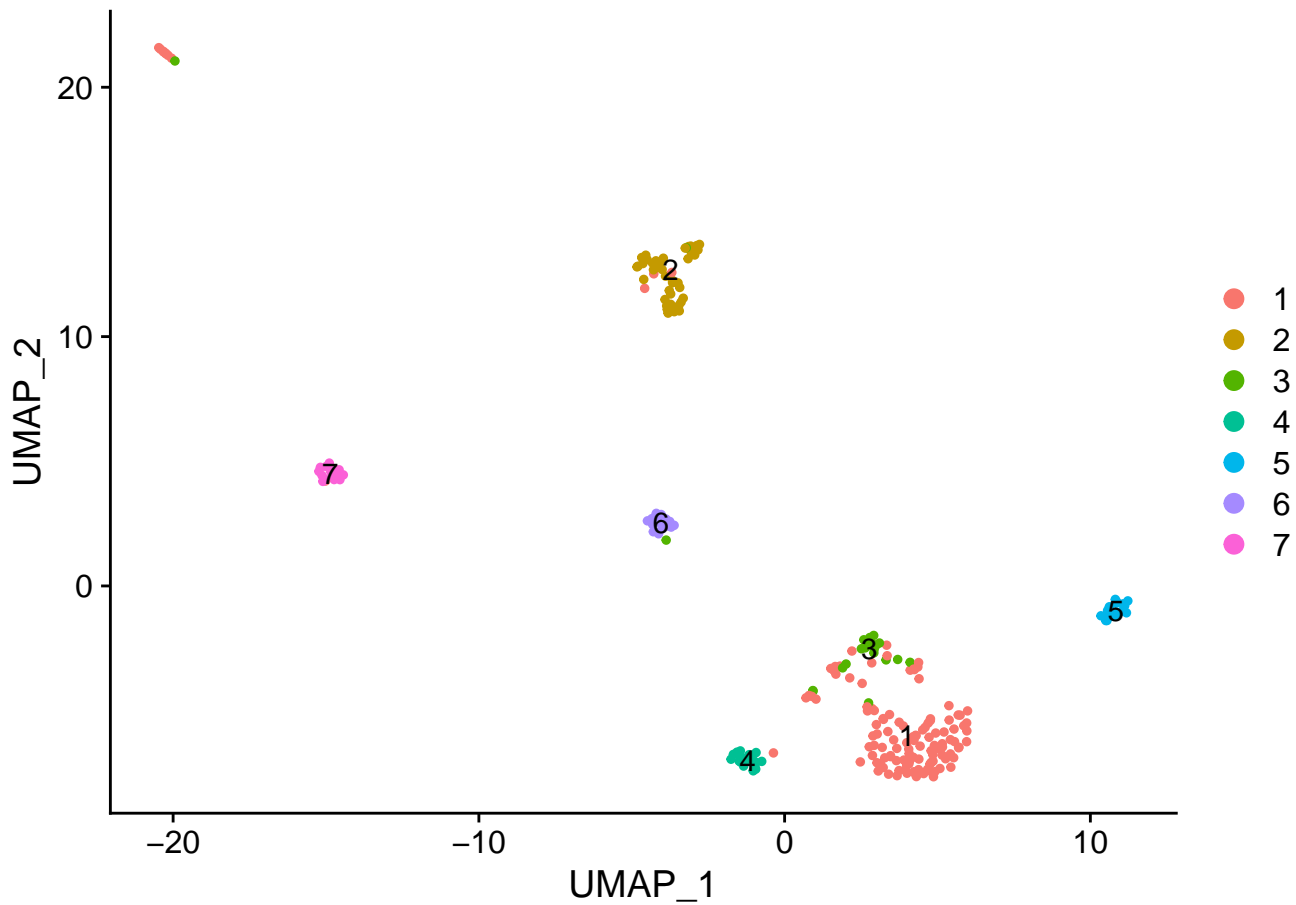

Supplement: supp3 [file elife-78793-supp3-v3.zip]

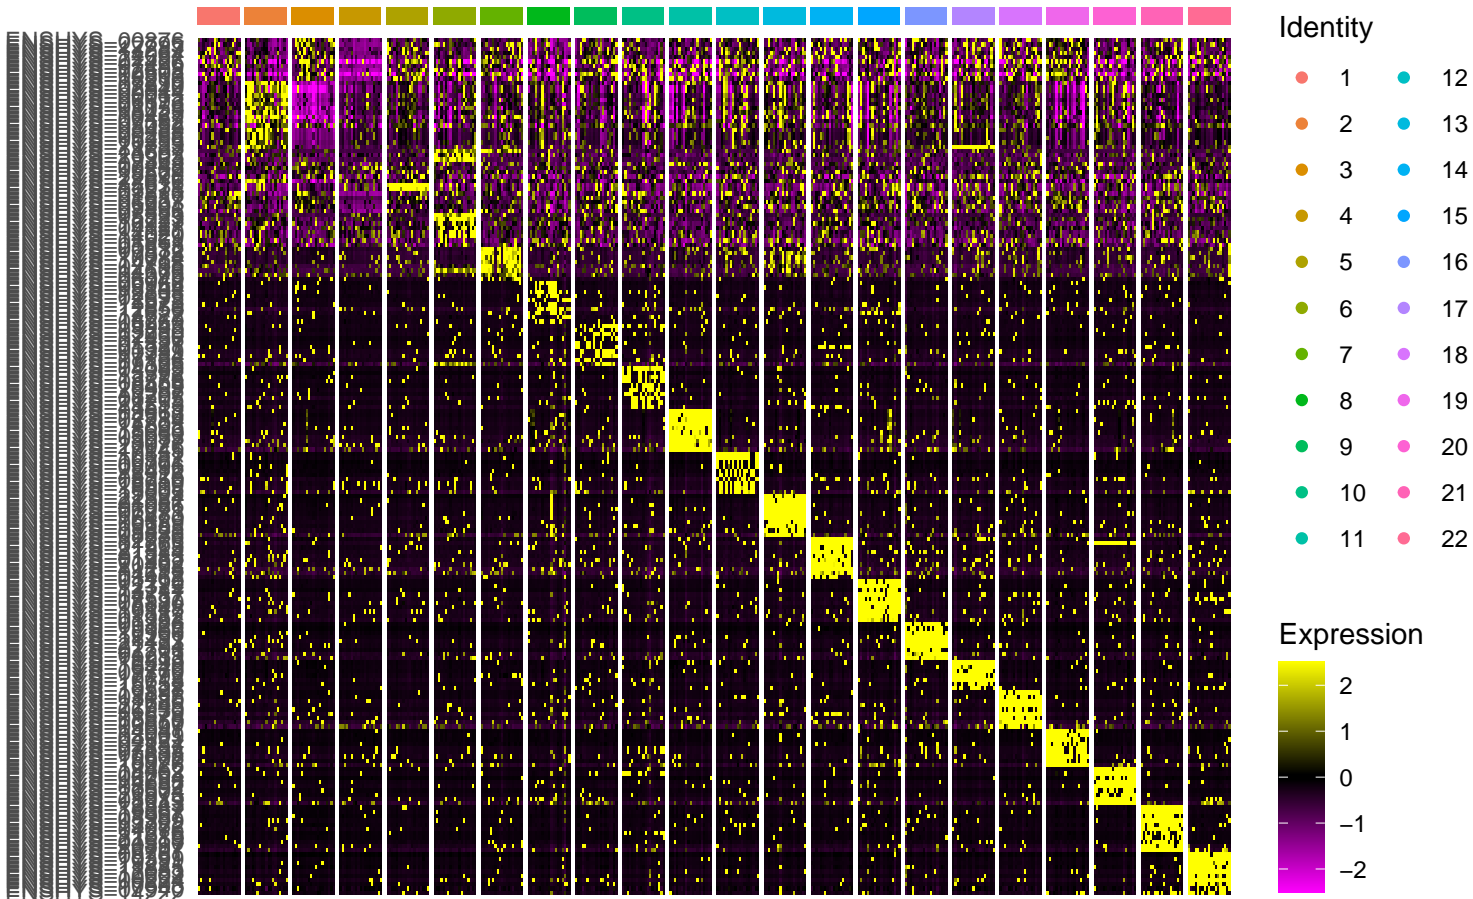

Supplement: supp3 [file elife-78793-supp3-v3.zip]

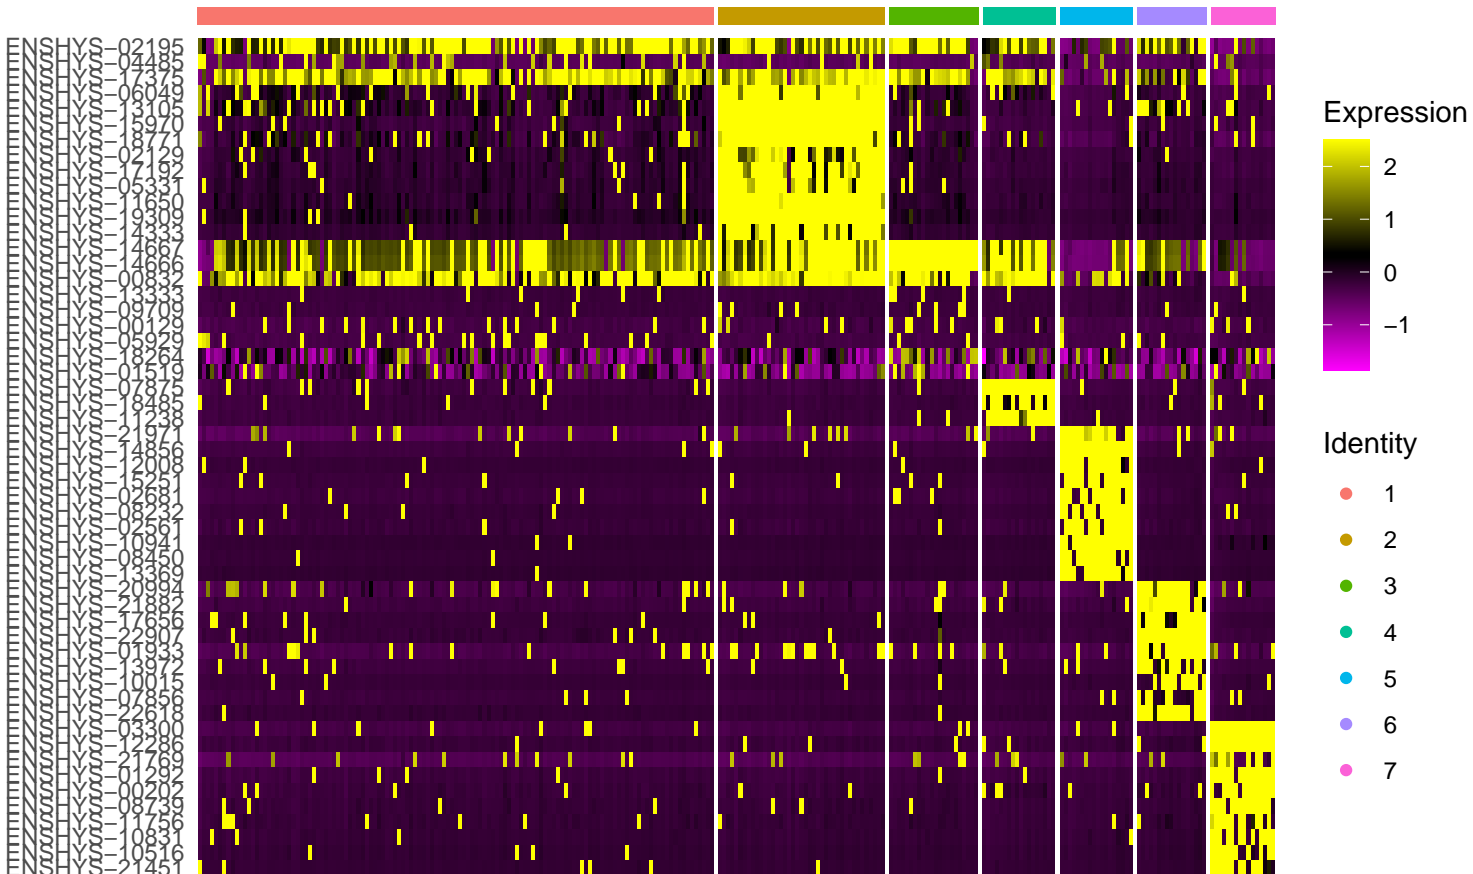

Supplement: supp3 [file elife-78793-supp3-v3.zip]

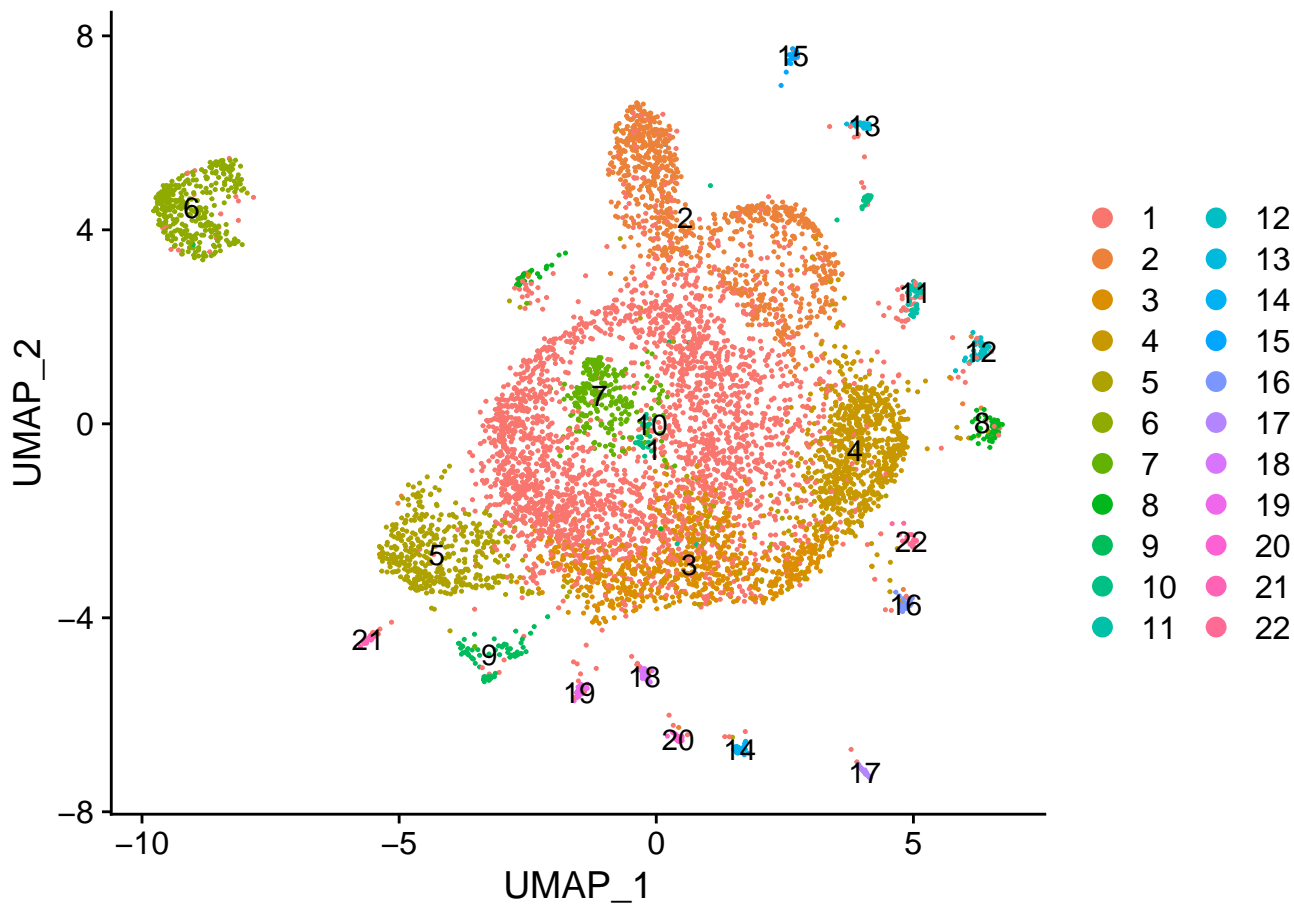

Supplement: supp3 [file elife-78793-supp3-v3.zip]

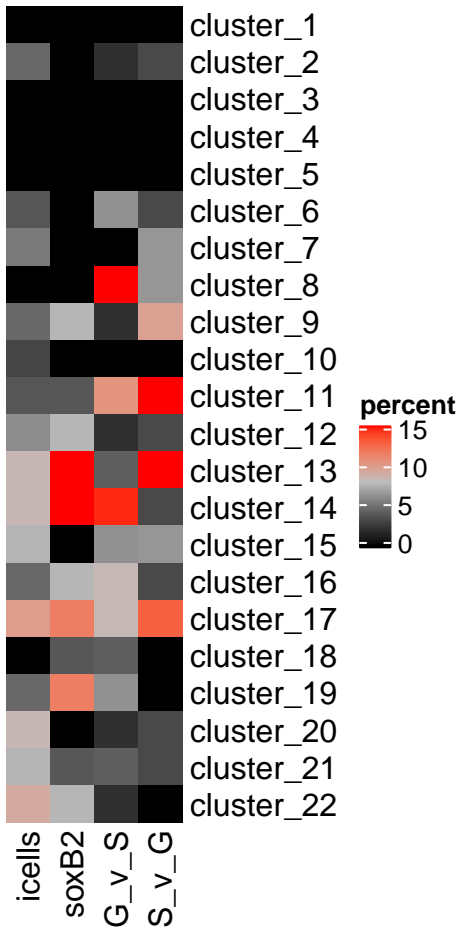

Supplement: supp3 [file elife-78793-supp3-v3.zip]

**ENSHYS-02209**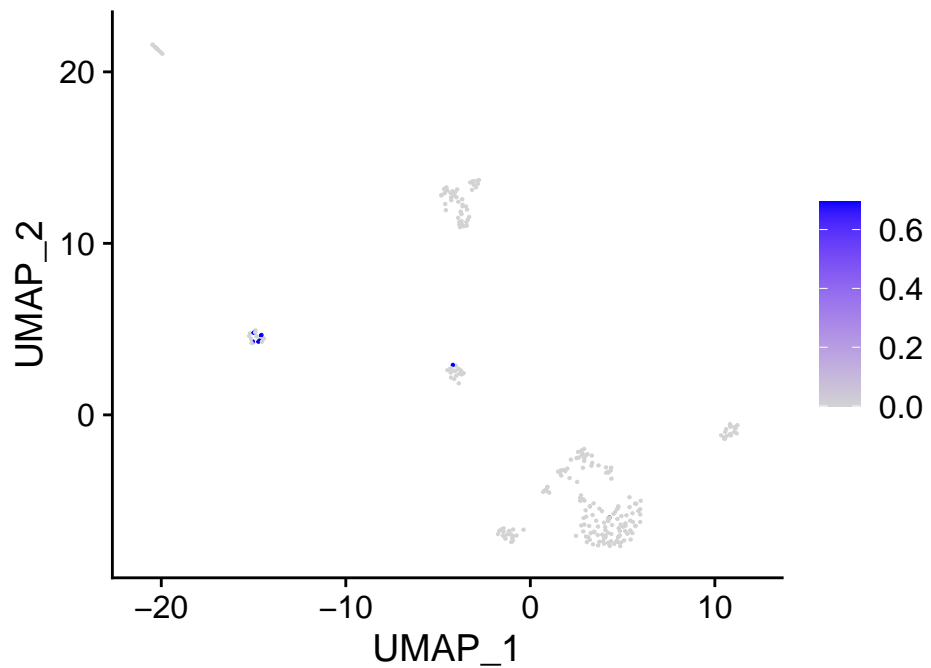**ENSHYS-01775**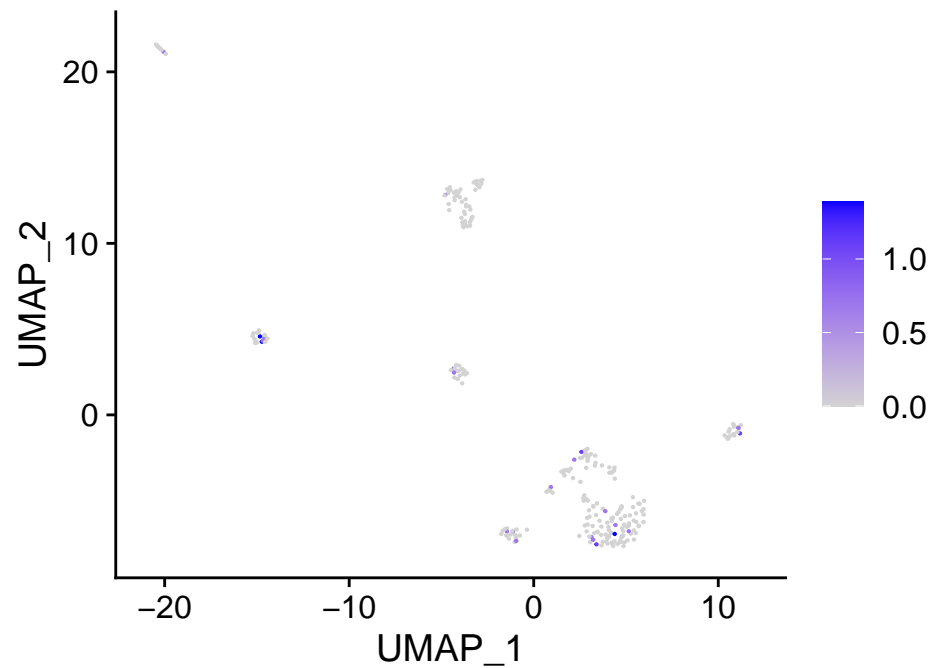**ENSHYS-18955**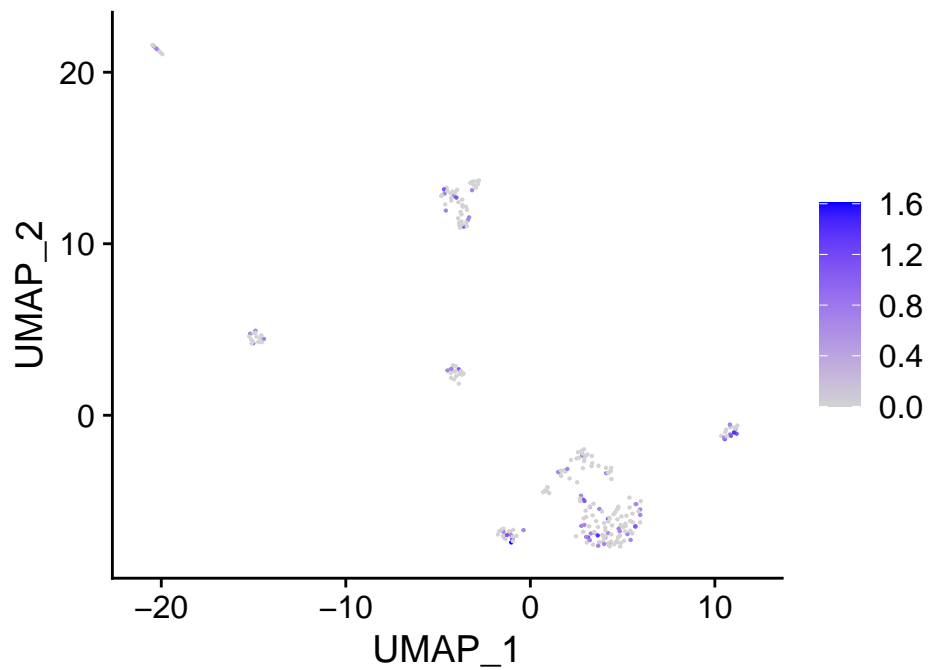**ENSHYS-19760**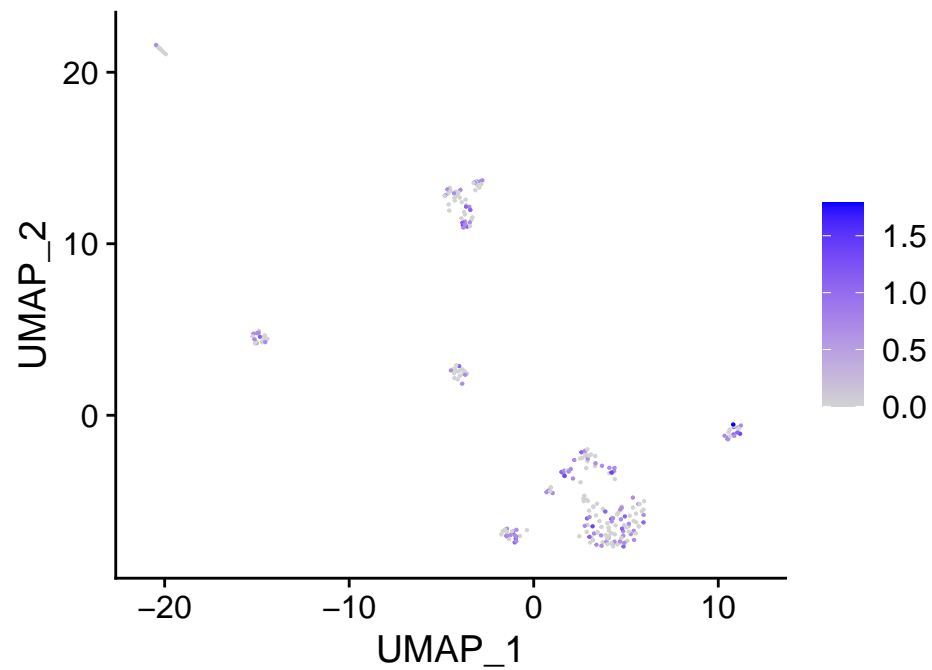

Supplement: supp3 [file elife-78793-supp3-v3.zip]

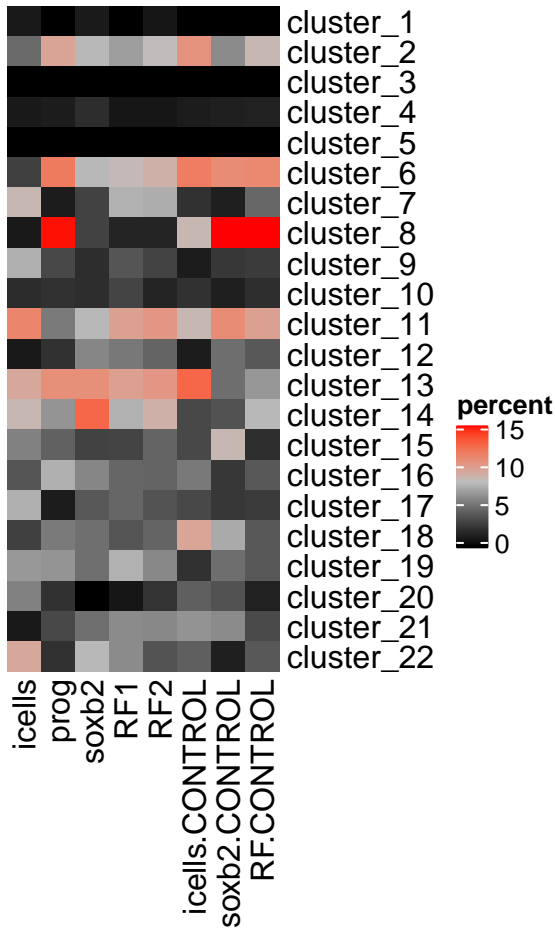

Supplement: supp3 [file elife-78793-supp3-v3.zip]
